# Supplementary material for: Borna Disease Virus 1 Phosphoprotein Forms a Tetramer and Interacts with Host Factors Involved in DNA Double-Strand Break Repair and mRNA Processing
Source: Viruses. 2022 Oct 26;14(11):2358. doi: 10.3390/v14112358 (PMC9692295; doi:10.3390/v14112358)
Supplement: Supplementary file 1 [file viruses-14-02358-s001.zip › Table S3 BioID.xlsx]

## Sheet: a. High confidence interactors
High-confidence interactors (green cells) are defined as a q-value<0.01 and a log2fc>1 between N- or C-ter FlagBirA*-tagged P triplicates against the top 3 control runs between 20 of BirA* alone
Interactors differentially represented between N- and C-ter constructs are highlighted in orange (based on LFQ of tab b.)				N-ter FlagBirA* P		C-ter BirA*Flag P		C-ter vs. N-ter
Uniprot ID	Gene	Alias	Full name	Log2fc	q-value	Log2fc	q-value	Log2fc	p-value
Q9H7C9	AAMDC	AAMDC	Mth938 domain-containing protein	0.67838	0.00174441	1.02418	0.00136	0.345833	0.0837925
Q4L235	AASDH	AASDH	Acyl-CoA synthetase family member 4	2.20022	0.000552113	2.83526	0	0.635033	0.110684
O96019	ACTL6A	ACTL6A	Actin-like protein 6A	0.619381	0.00145629	1.21049	0.000786355	0.591133	0.0270635
Q9UPW5	AGTPBP1	AGTPBP1	Cytosolic carboxypeptidase 1	1.9453	0	-0.253838	0.0965403	-2.19913	0.000673296
Q9NQW6	ANLN	ANLN	Actin-binding protein anillin	0.970191	0.00321951	1.4171	0	0.446867	0.177379
Q8IVW6	ARID3B	ARID3B	AT-rich interactive domain-containing protein 3B	1.00013	0.00048	0.971921	0.000108352	-0.0282333	0.640083
Q6VMQ6	ATF7IP	ATF7IP	Activating transcription factor 7-interacting protein 1	1.24919	0.000539202	0.303811	0.0633754	-0.945367	0.0159139
Q8WY36	BBX	BBX	HMG box transcription factor BBX	1.9373	0	1.66236	0	-0.2749	0.156836
Q6W2J9	BCOR	BCOR	BCL-6 corepressor	0.773786	0.000186408	1.41874	0.000115942	0.644967	0.0203885
Q9NZM4	GLTSCR1	BICRA	BRD4 interacting chromatin remodeling complex associated protein	0.0758673	0.266228	1.14878	0.00414086	1.07293	0.020557
O60885	BRD4	BRD4	Bromodomain-containing protein 4	0.848166	0	1.28026	0	0.432133	0.00638608
Q9BX63	BRIP1	BRIP1	Fanconi anemia group J protein	1.44109	0	1.48556	0	0.0445	0.462016
O14981	BTAF1	BTAF1	TATA-binding protein-associated factor 172	1.17547	0.00021286	0.689657	0.00283357	-0.4858	0.0498762
O00193	SMAP	C11orf58	Small acidic protein	2.04324	0	1.41257	0	-0.6307	0.00984115
Q9NZ63	C9orf78	C9orf78	Uncharacterized protein C9orf78	1.06929	0.000474684	0.683035	0	-0.386267	0.0304699
Q8WUQ7	CACTIN	CACTIN	Cactin	1.0886	0.00113907	1.20654	0	0.1179	0.45188
Q9P2K1	CC2D2A	CC2D2A	Coiled-coil and C2 domain-containing protein 2A	1.49615	0.0028093	0.830312	0.0671697	-0.665867	0.260157
Q6PII3	CCDC174	CCDC174	Coiled-coil domain-containing protein 174	2.00401	0.00154135	1.29646	0.00283563	-0.707567	0.130489
O60826	CCDC22	CCDC22	Coiled-coil domain-containing protein 22	0.328846	0.323386	3.77781	0	3.449	0.000620663
P20248	CCNA2	CCNA2	Cyclin-A2	1.02232	0.00078628	0.894939	0.000105495	-0.1274	0.205085
P51946	CCNH	CCNH	Cyclin-H	1.36628	0.00146191	0.419827	0.00403478	-0.946433	0.0115367
O75909	CCNK	CCNK	Cyclin-K	0.674725	0.00315134	1.05587	0.000297382	0.3812	0.0522319
O60563	CCNT1	CCNT1	Cyclin-T1	1.07533	0.000169611	1.10058	0	0.0252667	0.852078
O95400	CD2BP2	CD2BP2	CD2 antigen cytoplasmic tail-binding protein 2	0.687213	0	1.00266	0	0.315467	0.00750222
O14735	CDIPT	CDIPT	CDP-diacylglycerol--inositol 3-phosphatidyltransferase	1.0124	0.00257857	0.125561	0.20619	-0.886833	0.0106452
P49336	CDK8	CDK8	Cyclin-dependent kinase 8	0.886752	0.000968523	1.75761	0.00107285	0.870833	0.0523101
P50750	CDK9	CDK9	Cyclin-dependent kinase 9	0.947299	0	1.2542	0	0.3069	0.00044
Q96JM3	CHAMP1	CHAMP1	Chromosome alignment-maintaining phosphoprotein 1	0.677495	0.000205567	1.10338	0	0.4259	0.00415326
Q9P2D1	CHD7	CHD7	Chromodomain-helicase-DNA-binding protein 7	0.971741	0.0329041	2.45275	0	1.481	0.0269975
Q9HCK8	CHD8	CHD8	Chromodomain-helicase-DNA-binding protein 8	1.23656	0.000221198	1.48772	0	0.251133	0.136382
Q96RK0	CIC	CIC	Protein capicua homolog	1.09242	0.000442478	2.13211	0	1.03967	0.0161512
Q9HAW4	CLSPN	CLSPN	Claspin	0.799211	0.0741963	1.12936	0.00645801	0.330133	0.462542
Q8N1G2	CMTR1	CMTR1	Cap-specific mRNA (nucleoside-2-O-)-methyltransferase 1	1.10011	0.000218679	0.894074	0.000115108	-0.206033	0.179256
Q9UBI1	COMMD3	COMMD3	COMM domain-containing protein 3	-0.633836	0.000162988	1.92329	0	2.55713	1.85307e-05
Q9H0A8	COMMD4	COMMD4	COMM domain-containing protein 4	0.724071	0.00299621	0.998765	0.00216954	0.27475	0.319757
O95639	CPSF4	CPSF4	Cleavage and polyadenylation specificity factor subunit 4	0.689674	0.000972053	1.0157	0.00291372	0.326033	0.233809
P46108	CRK	CRK	Adapter molecule crk	1.00182	0	0.976474	0	-0.0253333	0.735941
P46109	CRKL	CRKL	Crk-like protein	0.885179	0.000167247	1.2057	0	0.320467	0.0249647
P33240	CSTF2	CSTF2	Cleavage stimulation factor subunit 2	1.36868	0	1.03375	0	-0.334933	0.049862
P39880	CUX1	CUX1	Homeobox protein cut-like 1	1.59243	0.00167812	0.788539	0.00271345	-0.803867	0.0379364
Q6UX04	CWC27	CWC27	Peptidyl-prolyl cis-trans isomerase CWC27 homolog	1.25783	0	0.736455	0.000664093	-0.521367	0.00190998
Q2TBE0	CWF19L2	CWF19L2	CWF19-like protein 2	0.834145	0.03294	1.05603	0.00978645	0.221867	0.617799
Q13561	DCTN2	DCTN2	Dynactin subunit 2	1.06768	0	-0.313138	0.000203024	-1.3808	2.61897e-05
Q9UJW0	DCTN4	DCTN4	Dynactin subunit 4	1.43257	0.000175182	-0.962572	0.0040973	-2.39513	0.00289031
O75398	DEAF1	DEAF1	Deformed epidermal autoregulatory factor 1 homolog	0.564184	0.00168421	1.48841	0	0.924233	2.48369e-06
Q92620	DHX38	DHX38	Pre-mRNA-splicing factor ATP-dependent RNA helicase PRP16	1.04007	0	1.03491	0	-0.00513333	0.957949
Q8IX18	DHX40	DHX40	Probable ATP-dependent RNA helicase DHX40	1.20229	0.00278769	0.0636285	0.941556	-1.13867	0.0250808
Q9BTC0	DIDO1	DIDO1	Death-inducer obliterator 1	0.891401	0.000667557	1.26886	0	0.377467	0.0419349
Q9NYP3	DONSON	DONSON	Protein downstream neighbor of Son	0.660874	0.0385928	1.61534	0.000202368	0.9544	0.0603521
Q9NX74	DUS2	DUS2	tRNA-dihydrouridine(20) synthase [NAD(P)+]-like	1.13716	0.00153558	0.380972	0.00486642	-0.7562	0.0161984
Q15723	ELF2	ELF2	ETS-related transcription factor Elf-2	1.07963	0.00131483	0.975204	0.00265103	-0.104433	0.672526
Q7Z589	EMSY	EMSY	Protein EMSY	1.00738	0.00265495	1.59223	0	0.584867	0.0564558
Q96L91	EP400	EP400	E1A-binding protein p400	1.6494	0.00168727	2.06809	0	0.4187	0.269328
Q86X53	ERICH1	ERICH1	Glutamate-rich protein 1	2.22605	0	0.906841	0.000790614	-1.3192	0.00165743
Q96DF8	DGCR14	ESS2	ess-2 splicing factor homolog	1.90377	0.000222222	2.5988	0	0.695033	0.0495979
Q99504	EYA3	EYA3	Eyes absent homolog 3	1.07292	0	1.07824	0.0006765	0.00533333	0.973702
Q96E09	FAM122A	FAM122A	Protein FAM122A	0.832774	0.0119395	1.1987	0.00435006	0.3659	0.437807
Q01167	FOXK2	FOXK2	Forkhead box protein K2	1.25303	0	1.20808	0.000801464	-0.0449333	0.835151
Q8IXQ4	GPALPP1	GPALPP1	GPALPP motifs-containing protein 1	1.14044	0.000193159	0.763003	0	-0.377433	0.0508267
Q92917	GPKOW	GPKOW	G patch domain and KOW motifs-containing protein	1.51722	0	1.2022	0	-0.315067	0.00443595
Q14687	GSE1	GSE1	Genetic suppressor element 1	1.49411	0	1.83275	0	0.338667	0.0225259
Q9UKN8	GTF3C4	GTF3C4	General transcription factor 3C polypeptide 4	1.08405	0	1.23428	0	0.150233	0.0296493
P51610	HCFC1	HCFC1	Host cell factor 1	1.25525	0	1.59383	0	0.3386	0.010866
Q13547	HDAC1	HDAC1	Histone deacetylase 1	1.38942	0	1.14478	0.000999167	-0.244667	0.292755
O94992	HEXIM1	HEXIM1	Protein HEXIM1	1.23079	0.000662252	1.0813	0.0013923	-0.1495	0.481823
P09429	HMGB1	HMGB1	High mobility group protein B1	5.09521	0	2.9279	0	-2.1673	4.06267e-05
P26583	HMGB2	HMGB2	High mobility group protein B2	3.17931	0	1.80039	0	-1.37893	4.3296e-05
O15347	HMGB3	HMGB3	High mobility group protein B3	1.25638	0.000236453	-0.408296	0.245933	-1.66463	0.0140806
Q9H0C8	ILKAP	ILKAP	Integrin-linked kinase-associated serine/threonine phosphatase 2C	1.20069	0	1.10783	0	-0.0928667	0.460313
Q8NFU5	IPMK	IPMK	Inositol polyphosphate multikinase	1.16583	0.0083173	0.420214	0.0038783	-0.7456	0.112317
Q7Z5L9	IRF2BP2	IRF2BP2	Interferon regulatory factor 2-binding protein 2	1.10909	0	1.01579	0	-0.0933	0.407835
Q15652	JMJD1C	JMJD1C	Probable JmjC domain-containing histone demethylation protein 2C	0.853809	0	2.03637	0	1.18253	0.000313088
O60341	KDM1A	KDM1A	Lysine-specific histone demethylase 1A	1.20522	0	1.55869	0	0.353433	0.060782
Q9Y4C1	KDM3A	KDM3A	Lysine-specific demethylase 3A	1.62945	0.000178439	2.26396	0	0.634533	0.00966127
Q7LBC6	KDM3B	KDM3B	Lysine-specific demethylase 3B	1.45628	0	1.61068	0	0.1544	0.141661
Q96AT1	KIAA1143	KIAA1143	Uncharacterized protein KIAA1143	1.65232	0.00156612	1.08107	0.00232114	-0.571233	0.071297
O95239	KIF4A	KIF4A	Chromosome-associated kinesin KIF4A	1.12822	0.000192	1.04819	0	-0.0800333	0.411149
Q8NG31	CASC5	KLN1	kinetochore scaffold 1	0.810945	0.00237225	1.19269	0.0019036	0.3817	0.257948
Q03164	KMT2A	KMT2A	Histone-lysine N-methyltransferase 2A	0.456256	0.0560021	1.70855	0	1.2523	0.00803015
Q9NS86	LANCL2	LANCL2	LanC-like protein 2	-0.000301679	1	1.02316	0.00250992	1.0235	0.0318053
Q96PV6	LENG8	LENG8	Leukocyte receptor cluster member 8	1.82471	0	2.32054	0	0.495867	0.00475841
Q6MZP7	LIN54	LIN54	Protein lin-54 homolog	1.56264	0.000174863	1.65079	0.000115663	0.0881	0.536041
Q5TKA1	LIN9	LIN9	Protein lin-9 homolog	0	1	1.45011	0.0041519	1.45	0.0015
Q9Y333	LSM2	LSM2	U6 snRNA-associated Sm-like protein LSm2	1.64398	0.00087021	1.69579	0	0.0518	0.799514
P62310	LSM3	LSM3	U6 snRNA-associated Sm-like protein LSm3	1.8771	0	1.91481	0	0.0377	0.758058
O95777	LSM8	LSM8	U6 snRNA-associated Sm-like protein LSm8	1.47638	0.000172352	1.4999	0	0.0235667	0.854024
Q92585	MAML1	MAML1	Mastermind-like protein 1	1.91899	0	2.12036	0	0.201333	0.166845
Q96GX5	MASTL	MASTL	Serine/threonine-protein kinase greatwall	1.67193	0	1.55663	0	-0.1153	0.457855
Q9UBB5	MBD2	MBD2	Methyl-CpG-binding domain protein 2	1.0619	0.0052507	1.54782	0	0.4859	0.164027
O95983	MBD3	MBD3	Methyl-CpG-binding domain protein 3	1.08298	0	0.983109	0	-0.0999	0.319886
Q15648	MED1	MED1	Mediator of RNA polymerase II transcription subunit 1	1.55163	0.000167832	1.45188	0	-0.0997333	0.442092
Q96G25	MED8	MED8	Mediator of RNA polymerase II transcription subunit 8	1.36344	0	1.0303	0.000295525	-0.33315	0.165908
Q14814	MEF2D	MEF2D	Myocyte-specific enhancer factor 2D	1.21258	0	1.3679	0	0.1553	0.0647501
Q86U44	METTL3	METTL3	N6-adenosine-methyltransferase 70 kDa subunit	1.06605	0.00022069	0.931515	0	-0.134533	0.214015
P40692	MLH1	MLH1	DNA mismatch repair protein Mlh1	1.38097	0.000741294	1.2534	0	-0.127567	0.54655
Q6P1R3	MSANTD2	MSANTD2	Myb/SANT-like DNA-binding domain-containing protein 2	1.15286	0.001527	1.24962	0	0.0967333	0.5814
Q96RE7	NACC1	NACC1	Nucleus accumbens-associated protein 1	0.942427	0.000773022	1.21801	0	0.275633	0.0754028
O60934	NBN	NBN	Nibrin	1.01923	0.000160804	0.740465	0	-0.2788	0.0992235
Q09161	NCBP1	NCBP1	Nuclear cap-binding protein subunit 1	1.67523	0.00216783	1.47528	0	-0.199933	0.599344
Q14686	NCOA6	NCOA6	Nuclear receptor coactivator 6	1.22222	0	2.1407	0	0.9185	0.00514463
O75376	NCOR1	NCOR1	Nuclear receptor corepressor 1	1.87431	0.00131343	2.35504	0.000110855	0.480733	0.311526
Q9H3P2	NELFA	NELFA	Negative elongation factor A	0.370478	0.03924	1.38182	0	1.01133	0.0106972
P18615	NELFE	NELFE	Negative elongation factor E	1.70305	0	1.26652	0	-0.436567	0.000324184
Q9NX24	NHP2	NHP2	H/ACA ribonucleoprotein complex subunit 2	1.49884	0	1.12077	0	-0.3781	0.045876
Q14207	NPAT	NPAT	Protein NPAT	1.34898	0.00465906	0.60894	0.00182831	-0.74	0.0710926
Q96L73	NSD1	NSD1	Histone-lysine N-methyltransferase, H3 lysine-36 and H4 lysine-20 specific	0.362486	0.0151836	1.02307	0	0.660567	0.00897473
Q9H0G5	NSRP1	NSRP1	Nuclear speckle splicing regulatory protein 1	1.04469	0.000761175	-0.329798	0.0140911	-1.37447	0.0019278
P0C799	P	P	Bornavirus P phosphoprotein	30.3745	0	29.6614	0	-0.713067	0.000113442
P51003	PAPOLA	PAPOLA	Poly(A) polymerase alpha	1.31509	0	1.38302	0	0.0679333	0.270508
Q9Y5B6	PAXBP1	PAXBP1	PAX3- and PAX7-binding protein 1	0.901213	0	1.08101	0	0.179767	0.163435
P49585	PCYT1A	PCYT1A	Choline-phosphate cytidylyltransferase A	1.27309	0.00054979	1.0884	0	-0.184733	0.365897
P78364	PHC1	PHC1	Polyhomeotic-like protein 1	0.607907	0.0152742	1.52596	0.000780749	0.918067	0.00731109
P54277	PMS1	PMS1	PMS1 protein homolog 1	1.14653	0.000191235	1.11618	0	-0.0303333	0.76532
P54278	PMS2	PMS2	Mismatch repair endonuclease PMS2	1.48089	0.00256616	1.11002	0.00010596	-0.3709	0.335001
P09884	POLA1	POLA1	DNA polymerase alpha catalytic subunit	1.40154	0.000228029	0.783431	0.000108108	-0.6181	0.00303724
P28340	POLD1	POLD1	DNA polymerase delta catalytic subunit	0.786126	0	1.10068	0	0.314533	0.0879912
Q15054	POLD3	POLD3	DNA polymerase delta subunit 3	1.34573	0	1.32432	0	-0.0213667	0.730456
Q9Y253	POLH	POLH	DNA polymerase eta	1.37612	0.00150583	1.70512	0.000114014	0.328967	0.276182
Q8NAT1	POMGNT2	POMGNT2	Protein O-linked-mannose beta-1,4-N-acetylglucosaminyltransferase 2	7.63314	0.000187135	0.702976	0.882021	-6.9302	0.0001
Q9Y3C6	PPIL1	PPIL1	Peptidyl-prolyl cis-trans isomerase-like 1	1.04799	0.00572055	1.73521	0.00341944	0.687233	0.156356
Q13356	PPIL2	PPIL2	Peptidyl-prolyl cis-trans isomerase-like 2	1.09502	0	1.85925	0	0.764233	0.00104043
Q9H2H8	PPIL3	PPIL3	Peptidyl-prolyl cis-trans isomerase-like 3	1.23497	0	1.23814	0	0.00316667	0.982439
Q8WUA2	PPIL4	PPIL4	Peptidyl-prolyl cis-trans isomerase-like 4	1.41881	0	0.326592	0.00251361	-1.0922	3.41589e-05
Q96QC0	PPP1R10	PPP1R10	Serine/threonine-protein phosphatase 1 regulatory subunit 10	0.943618	0.000782152	1.07209	0	0.1285	0.13274
P60510	PPP4C	PPP4C	Serine/threonine-protein phosphatase 4 catalytic subunit	1.38754	0	0.536613	0.0120248	-0.850933	0.0152688
Q9NY27	PPP4R2	PPP4R2	Serine/threonine-protein phosphatase 4 regulatory subunit 2	2.42406	0.000469484	0.875514	0.00491713	-1.54853	0.00166366
Q6IN85	SMEK1	PPP4R3A	Serine/threonine-protein phosphatase 4 regulatory subunit 3A	1.41878	0	0.639935	0.000115523	-0.778867	0.000532263
Q96BP3	PPWD1	PPWD1	Peptidylprolyl isomerase domain and WD repeat-containing protein 1	0.886215	0.00547107	1.04596	0.000784946	0.159733	0.556831
O60828	PQBP1	PQBP1	Polyglutamine-binding protein 1	1.10664	0.000555241	1.17466	0.000202151	0.0681	0.662048
Q92733	PRCC	PRCC	Proline-rich protein PRCC	1.59357	0	1.46481	0	-0.128767	0.115138
Q9H875	PRKRIP1	PRKRIP1	PRKR-interacting protein 1	1.47436	0.00313188	0.885477	0.00978084	-0.5889	0.0589737
Q8WWY3	PRPF31	PRPF31	U4/U6 small nuclear ribonucleoprotein Prp31	1.16359	0.00153441	0.237916	0.0458556	-0.925667	0.0166675
Q9GZU8	FAM192A	PSME3IP1	proteasome activator subunit 3 interacting protein 1	1.00419	0.000666667	0.421137	0.00707288	-0.583	0.00991595
Q7Z5J4	RAI1	RAI1	Retinoic acid-induced protein 1	0.635891	0.0175499	1.86623	0.000109966	1.2303	0.0196964
P98175	RBM10	RBM10	RNA-binding protein 10	1.08057	0	0.958275	0	-0.122333	0.205499
Q9NW64	RBM22	RBM22	Pre-mRNA-splicing factor RBM22	1.69197	0	3.90073	0	2.20877	0.000137438
P52756	RBM5	RBM5	RNA-binding protein 5	1.20155	0.000481541	0.929345	0.000944688	-0.2722	0.0476524
Q9UKL0	RCOR1	RCOR1	REST corepressor 1	1.10321	0	1.02808	0	-0.0751333	0.320162
P22670	RFX1	RFX1	MHC class II regulatory factor RFX1	0.649111	0.00118485	1.11986	0.000945518	0.470767	0.0505336
P48382	RFX5	RFX5	DNA-binding protein RFX5	0.907073	0.00216405	1.15346	0.000115385	0.246367	0.125328
O15541	RNF113A	RNF113A	RING finger protein 113A	2.48804	0	2.12837	0	-0.3597	0.00786763
O76064	RNF8	RNF8	E3 ubiquitin-protein ligase RNF8	1.13268	0.00308996	1.11847	0.000507042	-0.0142333	0.965074
P27694	RPA1	RPA1	Replication protein A 70 kDa DNA-binding subunit	1.08823	0.000165232	1.22097	0	0.1327	0.314549
P35244	RPA3	RPA3	Replication protein A 14 kDa subunit	0.902358	0.000766067	1.1189	0.000511156	0.216567	0.337181
Q5VT52	RPRD2	RPRD2	Regulation of nuclear pre-mRNA domain-containing protein 2	0.806129	0.000767053	1.02213	0	0.216	0.147376
Q92541	RTF1	RTF1	RNA polymerase-associated protein RTF1 homolog	1.09929	0	0.980267	0	-0.119	0.32903
Q9Y467	SALL2	SALL2	Sal-like protein 2	1.31539	0	1.69564	0	0.3802	0.0091228
Q9UHR5	SAP30BP	SAP30BP	SAP30-binding protein	1.29079	0	1.07795	0	-0.212867	0.105667
A3KN83	SBNO1	SBNO1	Protein strawberry notch homolog 1	1.52113	0	1.40138	0	-0.119733	0.459079
Q6IQ49	SDE2	SDE2	Protein SDE2 homolog	1.40276	0	1.55383	0	0.151067	0.316623
Q9GZR1	SENP6	SENP6	Sentrin-specific protease 6	1.58435	0.000969697	1.19567	0.000110727	-0.388667	0.143184
Q15637	SF1	SF1	Splicing factor 1	0.553644	0.00154571	1.03803	0	0.484367	0.00703439
Q12874	SF3A3	SF3A3	Splicing factor 3A subunit 3	1.02743	0	0.943172	0	-0.0842333	0.435711
O75182	SIN3B	SIN3B	Paired amphipathic helix protein Sin3b	0.479635	0.00526169	1.26282	0	0.783167	6.96318e-05
Q9UIU6	SIX4	SIX4	Homeobox protein SIX4	0.754588	0.0129744	1.11266	0.00291785	0.358033	0.0583627
Q13309	SKP2	SKP2	S-phase kinase-associated protein 2	1.14476	0.00237705	0.550018	0.00763251	-0.594767	0.070664
Q9BWU0	SLC4A1AP	SLC4A1AP	Kanadaptin	1.29138	0.000229117	1.61504	0	0.323633	0.0490325
O95391	SLU7	SLU7	Pre-mRNA-splicing factor SLU7	1.84666	0	1.50288	0.000670565	-0.343767	0.191225
Q8TAQ2	SMARCC2	SMARCC2	SWI/SNF complex subunit SMARCC2	0.733161	0	1.04774	0	0.314567	0.00451539
Q969G3	SMARCE1	SMARCE1	SWI/SNF-related matrix-associated actin-dependent regulator of chromatin subfamily E member 1	0.762361	0.00276273	1.26384	0	0.501467	0.0434132
O75391	SPAG7	SPAG7	Sperm-associated antigen 7	1.20823	0.00047619	0.953856	0.000304394	-0.254367	0.0746992
Q96EA4	SPDL1	SPDL1	Protein Spindly	2.08078	0	1.90751	0	-0.173267	0.00310394
Q96T58	SPEN	SPEN	Msx2-interacting protein	0.754624	0	1.11307	0	0.358467	0.0111213
Q6ZRS2	SRCAP	SRCAP	Helicase SRCAP	0.103322	0.734066	1.64253	0.000203905	1.5392	0.00597895
Q9H7L9	SUDS3	SUDS3	Sin3 histone deacetylase corepressor complex component SDS3	1.14455	0.0118007	1.24322	0.00418478	0.0986667	0.866563
Q8IWZ8	SUGP1	SUGP1	SURP and G-patch domain-containing protein 1	1.34077	0	1.49099	0	0.1503	0.0154132
Q96BN2	TADA1	TADA1	Transcriptional adapter 1	1.68118	0.00400873	0.898701	0.00372093	-0.782533	0.164841
O75528	TADA3	TADA3	Transcriptional adapter 3	1.01212	0.00115566	0.43469	0.0425713	-0.577433	0.108955
P21675	TAF1	TAF1	Transcription initiation factor TFIID subunit 1	1.06869	0.0071826	0.641192	0.00413811	-0.4275	0.277316
Q15542	TAF5	TAF5	Transcription initiation factor TFIID subunit 5	1.20438	0	0.580226	0.0130848	-0.624167	0.0661893
P49848	TAF6	TAF6	Transcription initiation factor TFIID subunit 6	1.27259	0.00279414	1.62225	0.000723915	0.349667	0.264623
Q9Y6J9	TAF6L	TAF6L	TAF6-like RNA polymerase II p300/CBP-associated factor-associated factor 65 kDa subunit 6L	1.05856	0.000775033	1.30946	0	0.2509	0.177394
Q16594	TAF9	TAF9	Transcription initiation factor TFIID subunit 9	1.55051	0.000961538	0.823866	0.051432	-0.726617	0.103328
Q5VWN6	FAM208B	TASOR2	transcription activation suppressor family member 2	1.03297	0.00155967	1.294	0	0.261033	0.241699
Q9BZK7	TBL1XR1	TBL1XR1	F-box-like/WD repeat-containing protein TBL1XR1	0.962322	0.00153909	1.68627	0	0.723967	0.0116541
P62380	TBPL1	TBPL1	TATA box-binding protein-like protein 1	1.85465	0.000468019	1.58867	0.00251732	-0.265967	0.53955
Q9UGU0	TCF20	TCF20	Transcription factor 20	1.6871	0	2.44994	0	0.762867	0.0313744
O95551	TDP2	TDP2	Tyrosyl-DNA phosphodiesterase 2	4.28529	0	2.86149	0	-1.4238	0.00046575
Q9UBB9	TFIP11	TFIP11	Tuftelin-interacting protein 11	1.50959	0	1.18241	0	-0.3272	0.039228
Q96FV9	THOC1	THOC1	THO complex subunit 1	1.12054	0	1.03422	0	-0.0863333	0.354742
Q86W42	THOC6	THOC6	THO complex subunit 6 homolog	1.04313	0	1.35034	0	0.307233	0.0812955
P29401	TKT	TKT	Transketolase	1.12898	0	0.598575	0.00601463	-0.5304	0.0331809
O94842	TOX4	TOX4	TOX high mobility group box family member 4	1.21667	0	1.47402	0	0.257367	0.00620951
Q12888	TP53BP1	TP53BP1	Tumor suppressor p53-binding protein 1	1.22639	0.00364568	0.59461	0.0106818	-0.631767	0.146594
Q9UPN9	TRIM33	TRIM33	E3 ubiquitin-protein ligase TRIM33	1.3001	0.000161345	1.05027	0.000727948	-0.2498	0.0477509
P40222	TXLNA	TXLNA	Alpha-taxilin	0.442043	0.0100138	1.04137	0	0.599333	0.0127236
Q9NUQ3	TXLNG	TXLNG	Gamma-taxilin	0.862083	0.000778068	1.47485	0	0.612767	0.00412701
Q9BTA9	WAC	WAC	WW domain-containing adapter protein with coiled-coil	0.835094	0.000458716	1.10367	0	0.2686	0.0957412
O75554	WBP4	WBP4	WW domain-binding protein 4	1.71413	0.000455235	1.24981	0.000111888	-0.464333	0.0452458
O75717	WDHD1	WDHD1	WD repeat and HMG-box DNA-binding protein 1	1.18382	0.00157098	0.848091	0.00292406	-0.335767	0.213058
Q9NW82	WDR70	WDR70	WD repeat-containing protein 70	1.02012	0	0.826611	0	-0.1935	0.0171711
Q15007	WTAP	WTAP	Pre-mRNA-splicing regulator WTAP	0.421471	0.00472934	1.01638	0.00103004	0.5949	0.0196379
Q9HCS7	XAB2	XAB2	Pre-mRNA-splicing factor SYF1	1.05938	0.000774026	1.04143	0	-0.0179333	0.870564
Q9ULM3	YEATS2	YEATS2	YEATS domain-containing protein 2	2.65081	0	2.19464	0	-0.456167	0.0751486
O95619	YEATS4	YEATS4	YEATS domain-containing protein 4	1.06389	0.000185328	0.79929	0.000683217	-0.264633	0.0814073
Q9BW85	CCDC94	YJU2	YJU2 splicing factor homolog	1.11089	0.000166667	1.0999	0	-0.0109667	0.944736
Q9ULJ3	ZBTB21	ZBTB21	Zinc finger and BTB domain-containing protein 21	1.04823	0.0012244	1.10587	0	0.0576	0.754624
Q86T24	ZBTB33	ZBTB33	Transcriptional regulator Kaiso	0.187057	0.0442579	1.07353	0	0.8865	0.00113987
Q9UQR1	ZNF148	ZNF148	Zinc finger protein 148	1.09784	0.00150846	1.11384	0	0.0159333	0.932725
O75362	ZNF217	ZNF217	Zinc finger protein 217	0.582516	0.00913203	1.29842	0.00296275	0.7159	0.181691
Q9Y2X9	ZNF281	ZNF281	Zinc finger protein 281	1.09059	0	1.53707	0	0.446433	0.00104186
Q5VUA4	ZNF318	ZNF318	Zinc finger protein 318	0.836982	0.000742217	1.16173	0	0.324767	0.0694058
Q5T0B9	ZNF362	ZNF362	Zinc finger protein 362	0.401931	0.0235278	1.14268	0.000111111	0.740767	0.0270982
Q9Y4E5	ZNF451	ZNF451	Zinc finger protein 451	1.07556	0.00476716	0.714638	0.00792706	-0.360933	0.248458
Q9ULD9	ZNF608	ZNF608	Zinc finger protein 608	1.09852	0.0011714	1.19045	0.00491101	0.0919167	0.700224
Q9UEG4	ZNF629	ZNF629	Zinc finger protein 629	0.889811	0.0105093	1.07957	0	0.189733	0.561205
Q9H7S9	ZNF703	ZNF703	Zinc finger protein 703	1.42702	0.9996	2.38414	0.00386263	0.957167	0.001
Q8TBC5	ZSCAN18	ZSCAN18	Zinc finger and SCAN domain-containing protein 18	1.37623	0.000675676	1.18372	0.00348128	-0.192467	0.584764

## Sheet: b. Raw data - Stat. analysis
T: Majority protein IDs	T: Gene names	T: Protein names	top Ctrl1	top Ctrl2	top Ctrl3	LFQ intensity FB_P_A	LFQ intensity FB_P_B	LFQ intensity FB_P_C	LFQ intensity P-BF_A	LFQ intensity P-BF_B	LFQ intensity P-BF_C	log2fc	p-val	C: Only identified by site	C: Reverse	C: Potential contaminant	C: Student's T-test Significant FB-P_Ctrl	C: Student's T-test Significant P-BF_Ctrl	C: Student's T-test significant	N: Peptides	N: Razor + unique peptides	N: Unique peptides	N: Sequence coverage [%]	N: Unique + razor sequence coverage [%]	N: Unique sequence coverage [%]	N: Mol. weight [kDa]	N: Q-value	N: Score	N: Intensity	N: MS/MS count	N: -Log Student's T-test p-value FB-P_Ctrl	N: Student's T-test q-value FB-P_Ctrl	N: Student's T-test Difference FB-P_Ctrl	N: Student's T-test Test statistic FB-P_Ctrl	N: -Log Student's T-test p-value P-BF_Ctrl	N: Student's T-test q-value P-BF_Ctrl	N: Student's T-test Difference P-BF_Ctrl	N: Student's T-test Test statistic P-BF_Ctrl	T: Protein IDs
P0C799	P	Bornavirus P phosphoprotein	21.7094	21.4565	21.2525	51.873	51.8704	51.7984	51.0915	51.2153	51.0958	-0.713067	0.000113442				+	+	FB-P_Ctrl;P-BF_Ctrl	21	21	21	84.6	84.6	84.6	22.363	0	323.31	9158400000000000	5874	8.63828	0	30.3745	225.993	8.548	0	29.6614	214.547	P0C799
P06709	BirA*	Bifunctional ligase/repressor BirA (R118G mutant)	52.6273	52.0131	52.0061	52.412	52.5173	49.0956	51.4343	51.4741	51.5393	0.140933	0.906255					+	P-BF_Ctrl	37	37	37	92	92	92	39.04	0	323.31	5.5869e+16	17367	0.312618	0.500258	-0.873912	-0.765145	1.61219	0.00465992	-0.732972	-3.52119	A0A025
A0FGR8	ESYT2	Extended synaptotagmin-2	27.7044	27.6714	27.5981	26.641	26.6122	26.5147	26.7753	26.9705	26.5618	0.1799	0.220617				+	+	FB-P_Ctrl;P-BF_Ctrl	16	16	16	26.7	26.7	26.7	102.36	0	64.347	2724600000	121	4.56607	0	-1.06869	-21.6028	2.72249	0.000297694	-0.888783	-7.27717	A0FGR8
A0MZ66	KIAA1598	Shootin-1	29.1832	29.055	29.0525	28.9149	28.7227	28.7263	28.3892	28.042	28.2482	-0.5615	0.00921788				+	+	FB-P_Ctrl;P-BF_Ctrl	22	22	22	39.6	39.6	39.6	71.639	0	216.77	7863900000	261	1.80158	0.00349486	-0.308945	-4.02558	2.86547	0.00010872	-0.870441	-7.93884	A0MZ66
A1X283	SH3PXD2B	SH3 and PX domain-containing protein 2B	26.7279	26.7231	26.6621	26.611	26.6294	26.6847	25.746	25.8447	25.097	-1.07913	0.0101753					+	P-BF_Ctrl	13	13	13	22.7	22.7	22.7	101.58	0	35.306	1275300000	55	0.956974	0.0368643	-0.0626634	-2.04421	2.07846	0.00209166	-1.1418	-4.8487	A1X283;Q5TCZ1
A3KN83	SBNO1	Protein strawberry notch homolog 1	27.1281	27.0679	27.0648	28.3899	28.5948	28.8395	28.619	28.3958	28.4502	-0.119733	0.459079				+	+	FB-P_Ctrl;P-BF_Ctrl	25	25	25	24.7	24.7	24.7	154.31	0	174.5	2341300000	141	3.49505	0	1.52113	11.5601	4.42802	0	1.40138	19.9402	A3KN83;Q9Y2G9
A5YKK6	CNOT1	CCR4-NOT transcription complex subunit 1	28.266	28.2273	28.2259	27.515	27.2963	27.2925	26.9632	26.8249	26.9802	-0.445167	0.00732396				+	+	FB-P_Ctrl;P-BF_Ctrl	32	32	32	16.8	16.8	16.8	266.94	0	83.663	4120300000	192	3.51075	0	-0.871807	-11.6676	4.87747	0	-1.31695	-25.8718	A5YKK6
A6NHR9	SMCHD1	Structural maintenance of chromosomes flexible hinge domain-containing protein 1	29.2355	29.2305	29.1785	29.0054	29.0503	29.1668	29.3908	29.449	29.3661	0.3278	0.00372255					+	P-BF_Ctrl	41	41	41	24.9	24.9	24.9	226.37	0	230.77	8296200000	336	1.2828	0.0136584	-0.140675	-2.73555	2.44239	0.000955595	0.187146	6.11976	A6NHR9
A6NKD9	CCDC85C	Coiled-coil domain-containing protein 85C	27.9575	27.7516	27.7486	27.5628	28.064	27.8296	26.9527	26.9412	26.8961	-0.8888	0.00366382					+	P-BF_Ctrl	13	13	13	40.3	40.3	40.3	45.209	0	161.39	3246400000	108	0.000811289	1	-0.000399272	-0.00248843	3.62471	0	-0.88921	-12.4773	A6NKD9
A8CG34	POM121C	Nuclear envelope pore membrane protein POM 121C;Nuclear envelope pore membrane protein POM 121;Putative nuclear envelope pore membrane protein POM 121B	25.9521	25.9272	25.825	24.7236	24.3781	24.4952	25.6743	25.2252	25.3145	0.872367	0.00692876				+	+	FB-P_Ctrl;P-BF_Ctrl	6	6	6	9	9	9	125.09	0	16.019	745220000	36	3.64146	0	-1.36915	-12.6008	1.59681	0.00468801	-0.496789	-3.48207	A8CG34;Q96HA1;A6NF01
P62308	SNRPG	Small nuclear ribonucleoprotein G;Putative small nuclear ribonucleoprotein G-like protein 15	26.2405	26.0339	25.7107	26.707	26.9556	27.0566	26.0643	26.2313	26.7667	-0.5523	0.0793161				+		FB-P_Ctrl	2	2	2	17.1	17.1	17.1	8.496	0	18.536	1280200000	53	2.0952	0.00235038	0.911375	4.90216	0.615355	0.105493	0.359073	1.37031	P62308;A8MWD9
C9JLW8	FAM195B	Protein FAM195B	26.6253	26.5949	26.5041	26.1097	25.9556	26.041	26.0255	25.777	25.6532	-0.216867	0.14043				+	+	FB-P_Ctrl;P-BF_Ctrl	4	4	4	50.5	50.5	50.5	10.92	0	35.575	1237200000	68	3.14158	0.000169312	-0.53935	-9.37274	2.55297	0.000646617	-0.756208	-6.55615	C9JLW8
E9PAV3	NACA	Nascent polypeptide-associated complex subunit alpha, muscle-specific form;Nascent polypeptide-associated complex subunit alpha	30.2776	30.2474	30.1663	29.5764	29.3207	29.3055	29.3473	29.2098	29.3661	-0.0931333	0.407572				+	+	FB-P_Ctrl;P-BF_Ctrl	5	5	5	3.4	3.4	3.4	205.42	0	283.95	11936000000	246	3.04198	0.000480769	-0.829565	-8.83018	3.99778	0	-0.922733	-15.5239	E9PAV3;Q13765;Q9BZK3
E9PRG8	C11orf98	Uncharacterized protein C11orf98	28.2021	27.7674	27.7543	26.0552	26.481	26.2822	27.2728	27.162	27.1509	0.922433	0.00202478				+	+	FB-P_Ctrl;P-BF_Ctrl	2	2	2	21.1	21.1	21.1	14.234	0	29.882	2690700000	52	2.98369	0.000459418	-1.63513	-8.5262	2.02558	0.00251176	-0.712641	-4.68281	E9PRG8
L0R819	ASNSD1	Asparagine synthetase domain-containing protein 1	25.2617	25.1613	25.1419	25.0209	24.7211	24.959	24.7224	24.9327	24.8811	-0.0549333	0.64706					+	P-BF_Ctrl	4	4	4	59.4	59.4	59.4	11.25	0	6.3828	523510000	24	1.36409	0.0115409	-0.287966	-2.92002	2.02259	0.00257373	-0.34288	-4.67355	L0R819
O00139	KIF2A	Kinesin-like protein KIF2A	27.9543	27.9214	27.9151	28.2566	28.0442	27.9986	28.1879	28.1875	28.1683	0.0814333	0.364989					+	P-BF_Ctrl	15	15	14	20.5	20.5	19.3	79.954	0	66.999	3766000000	124	0.988216	0.033337	0.169531	2.10775	4.27587	0	0.250956	18.2535	O00139
O00148	DDX39A	ATP-dependent RNA helicase DDX39A	26.8094	26.385	26.322	25.7823	26.0874	25.8419	25.3087	25.8995	25.8926	-0.2036	0.40107				+	+	FB-P_Ctrl;P-BF_Ctrl	15	4	4	38.9	17.6	17.6	49.129	0	17.066	1476700000	79	1.54648	0.00737105	-0.601608	-3.35587	1.49929	0.00624787	-0.805195	-3.23999	O00148
O00151	PDLIM1	PDZ and LIM domain protein 1	32.1243	31.9684	31.9636	32.0994	32.1632	32.1967	31.0787	31.1877	31.1799	-1.00433	2.43758e-05					+	P-BF_Ctrl	15	15	15	57.1	57.1	57.1	36.071	0	323.31	58551000000	953	1.05172	0.0274324	0.134306	2.23846	3.78754	0	-0.870039	-13.7284	O00151
O00154	ACOT7	Cytosolic acyl coenzyme A thioester hydrolase	29.0271	28.949	28.9047	26.5334	25.905	25.591	26.702	25.9409	26.5769	0.3968	0.336585				+	+	FB-P_Ctrl;P-BF_Ctrl	11	11	11	35.5	35.5	35.5	41.796	0	70.867	5048900000	215	3.34237	0.000208696	-2.95045	-10.5621	3.36663	0	-2.55368	-10.715	O00154
O00159	MYO1C	Unconventional myosin-Ic	25.9112	25.8783	25.836	25.7004	25.1192	25.3064	24.8138	23.9243	24.4909	-0.965667	0.036157					+	P-BF_Ctrl	9	9	9	12.2	12.2	12.2	121.68	0	19.588	799740000	39	1.35311	0.0116669	-0.499822	-2.89477	2.30665	0.00130921	-1.46548	-5.6176	O00159
O00161	SNAP23	Synaptosomal-associated protein 23	28.3648	28.3123	28.2817	27.0124	27.6767	27.8173	27.0814	26.6269	26.8875	-0.636867	0.0860444				+	+	FB-P_Ctrl;P-BF_Ctrl	8	8	8	42.2	42.2	42.2	23.354	0	42.078	4527600000	106	1.51479	0.00832271	-0.817439	-3.2778	3.38951	0	-1.45434	-10.8612	O00161
O00178	GTPBP1	GTP-binding protein 1	27.7075	27.2951	27.2206	26.0756	26.8595	26.8409	26.1604	26.345	26.794	-0.158867	0.645132					+	P-BF_Ctrl	12	12	12	32.4	32.4	32.4	72.453	0	60.372	2285700000	105	1.278	0.0139988	-0.815774	-2.72483	1.80504	0.00383685	-0.974596	-4.03519	O00178
O00193	SMAP	Small acidic protein	28.3167	28.2389	28.2185	30.4755	30.1315	30.2969	29.4838	29.7671	29.7609	-0.6307	0.00984115				+	+	FB-P_Ctrl;P-BF_Ctrl	5	5	5	25.7	25.7	25.7	20.332	0	323.31	6700700000	285	4.40696	0	2.04324	19.6979	3.86892	0	1.41257	14.3982	O00193
O00203	AP3B1	AP-3 complex subunit beta-1	29.4503	29.4069	29.3523	28.8924	28.6525	28.6353	28.482	28.4208	28.4456	-0.277267	0.0308707				+	+	FB-P_Ctrl;P-BF_Ctrl	29	29	23	31.4	31.4	25.2	121.32	0	177	8757600000	286	2.81802	0.000664894	-0.676471	-7.71351	5.04443	0	-0.953731	-28.4942	O00203
O00213	APBB1	Amyloid beta A4 precursor protein-binding family B member 1	27.0249	26.8431	26.7824	26.6994	26.6067	26.5068	26.5344	26.1113	26.1195	-0.349233	0.0808874					+	P-BF_Ctrl	6	6	6	14.8	14.8	14.8	77.243	0	69.136	1670300000	90	1.41871	0.0102914	-0.279204	-3.0472	1.7883	0.00391935	-0.628395	-3.98876	O00213
O00231	PSMD11	26S proteasome non-ATPase regulatory subunit 11	28.2379	28.1366	28.0732	27.8974	27.8388	27.8771	27.5815	27.5187	27.4468	-0.355433	0.00112163				+	+	FB-P_Ctrl;P-BF_Ctrl	14	14	14	38.9	38.9	38.9	47.463	0	30.682	3378300000	106	2.26102	0.00150874	-0.278147	-5.45659	3.2928	0	-0.633589	-10.256	O00231
O00264	PGRMC1	Membrane-associated progesterone receptor component 1	29.2635	29.1741	29.1721	27.9223	27.3386	27.2395	27.3654	27.6572	27.3102	-0.0558667	0.82642				+	+	FB-P_Ctrl;P-BF_Ctrl	10	10	10	39	39	39	21.671	0	137.86	6136500000	254	2.86071	0.000539945	-1.7031	-7.91597	4.02087	0	-1.75895	-15.7345	O00264
O00267	SUPT5H	Transcription elongation factor SPT5	27.9046	27.7559	27.64	28.081	28.2527	28.565	27.8724	27.7394	28.2546	-0.3441	0.175929				+		FB-P_Ctrl	20	20	20	25.5	25.5	25.5	121	0	140.77	2859100000	126	1.52703	0.00814388	0.53272	3.30784	0.474642	0.198977	0.188623	1.09444	O00267
O00299	CLIC1	Chloride intracellular channel protein 1	28.2718	28.2354	28.2137	27.8827	27.8731	28.0382	27.4636	27.4178	27.4934	-0.473067	0.00121749				+	+	FB-P_Ctrl;P-BF_Ctrl	8	8	8	41.1	41.1	41.1	26.922	0	69.922	3066600000	122	2.27539	0.00152558	-0.309008	-5.5069	5.02501	0	-0.782047	-28.1762	O00299
O00303	EIF3F	Eukaryotic translation initiation factor 3 subunit F	27.8034	27.7449	27.725	26.8749	26.8673	26.941	26.7734	26.6389	26.5149	-0.252	0.0322364				+	+	FB-P_Ctrl;P-BF_Ctrl	10	10	10	39.8	39.8	39.8	37.563	0	55.001	3056800000	126	4.88745	0	-0.863363	-26.0216	3.85126	0	-1.11535	-14.2503	O00303
O00400	SLC33A1	Acetyl-coenzyme A transporter 1	25.6324	25.6141	25.5703	24.7766	24.6574	24.658	24.5188	Not detected	24.7665	-0.0546833	0.64017				+	+	FB-P_Ctrl;P-BF_Ctrl	4	4	4	9.1	9.1	9.1	60.908	0	8.65	663420000	35	4.49892	0	-0.908313	-20.7778	2.6845	0.000512195	-0.962982	-10.0991	O00400
O00410	IPO5	Importin-5	27.8759	27.6538	27.6081	25.2058	25.7722	25.3557	25.1052	25.2418	25.5054	-0.160433	0.479921				+	+	FB-P_Ctrl;P-BF_Ctrl	11	11	11	16.9	16.9	16.9	123.63	0	47.415	2450100000	121	3.56272	0	-2.26804	-12.0305	4.14397	0	-2.42846	-16.9049	O00410
O00418	EEF2K	Eukaryotic elongation factor 2 kinase	25.5858	25.4538	25.156	Not detected	24.3593	24.5283	Not detected	24.5999	24.314	0.01315	0.944092				+	+	FB-P_Ctrl;P-BF_Ctrl	7	7	7	11.2	11.2	11.2	82.143	0	9.1932	475670000	16	1.91171	0.00277914	-0.954718	-5.43062	1.76726	0.00409333	-0.941592	-4.81218	O00418
O00422	SAP18	Histone deacetylase complex subunit SAP18	27.0341	27.0324	26.8521	Not detected	Not detected	Not detected	25.9098	26.5339	25.9845	#DIV/0!	#DIV/0!					+	P-BF_Ctrl	7	7	7	50.3	50.3	50.3	17.561	0	198.32	1184000000	21	0	0.951015	Not detected	0	1.80434	0.00383164	-0.830175	-4.03325	O00422
O00425	IGF2BP3	Insulin-like growth factor 2 mRNA-binding protein 3	27.6827	27.4964	27.4689	26.8869	26.8123	26.7733	27.0749	27.0893	27.0268	0.2395	0.00333826				+	+	FB-P_Ctrl;P-BF_Ctrl	11	9	9	25.9	21.9	21.9	63.704	0	82.658	3387300000	131	3.19407	0.000178108	-0.725169	-9.67099	2.64988	0.000681188	-0.485668	-6.96029	O00425
O00429	DNM1L	Dynamin-1-like protein	28.8985	28.7737	28.6879	27.9951	27.8385	28.1188	27.6975	27.7268	27.6708	-0.285767	0.0259227				+	+	FB-P_Ctrl;P-BF_Ctrl	24	24	24	46.1	46.1	46.1	81.876	0	292.03	6550700000	271	2.85784	0.000538462	-0.802572	-7.90222	4.17479	0	-1.08831	-17.211	O00429
O00505	KPNA3	Importin subunit alpha-4	27.6804	27.6552	27.6184	28.4361	28.4983	28.396	27.353	26.2672	27.1531	-1.51903	0.0105384				+		FB-P_Ctrl	9	9	7	25.3	25.3	19.8	57.81	0	102.21	2885200000	82	4.65752	0	0.792122	22.7787	1.02128	0.0237166	-0.726905	-2.17554	O00505
O00541	PES1	Pescadillo homolog	28.947	28.8656	28.8432	27.7551	27.676	27.8165	28.2622	27.8688	28.0498	0.311067	0.0615648				+	+	FB-P_Ctrl;P-BF_Ctrl	13	13	13	26	26	26	68.002	0	43.94	5973800000	156	4.60393	0	-1.13605	-22.0822	2.65758	0.000685259	-0.82498	-6.99333	O00541
O00567	NOP56	Nucleolar protein 56	30.2517	30.0194	29.989	28.3633	29.2461	28.78	29.2597	29.1232	29.1152	0.369567	0.227144				+	+	FB-P_Ctrl;P-BF_Ctrl	19	19	19	39.6	39.6	39.6	66.049	0	200.64	12452000000	287	2.06688	0.00232312	-1.29024	-4.81202	3.19254	0	-0.920686	-9.66218	O00567
O00571	DDX3X	ATP-dependent RNA helicase DDX3X;ATP-dependent RNA helicase DDX3Y	32.7512	32.7015	32.6259	31.5483	32.2034	32.0183	31.6472	31.7455	31.6398	-0.245833	0.282086				+	+	FB-P_Ctrl;P-BF_Ctrl	37	37	36	58.6	58.6	56.9	73.243	0	323.31	99944000000	1197	1.74849	0.0042536	-0.769521	-3.87976	4.46397	0	-1.01535	-20.3606	O00571;O15523;Q9NQI0
O00743	PPP6C	Serine/threonine-protein phosphatase 6 catalytic subunit;Serine/threonine-protein phosphatase 6 catalytic subunit, N-terminally processed	27.0933	27.0496	27.0275	27.8667	27.7749	27.7403	26.8164	26.6877	26.7622	-1.03853	4.01437e-05				+	+	FB-P_Ctrl;P-BF_Ctrl	7	7	7	27.9	27.9	27.9	35.144	0	23.994	2176600000	86	4.19316	0	0.737164	17.396	2.69842	0.000519053	-0.301359	-7.17076	O00743
O00762	UBE2C	Ubiquitin-conjugating enzyme E2 C	24.1348	23.8846	23.8815	Not detected	23.5593	23.5515	23.6174	23.5989	Not detected	0.05275	0.03436				+	+	FB-P_Ctrl;P-BF_Ctrl	2	2	2	16.8	16.8	16.8	19.652	0.0016456	2.8275	112550000	9	1.494	0.00874293	-0.41162	-3.79733	1.34139	0.00936885	-0.358846	-3.305	O00762
O00763	ACACB	Acetyl-CoA carboxylase 2;Biotin carboxylase	30.4466	30.3635	30.3607	28.7882	28.7148	28.5088	30.3236	30.2398	30.1436	1.56507	9.16244e-05				+		FB-P_Ctrl	69	55	55	32.9	26.4	26.4	276.54	0	260.11	10492000000	448	4.38827	0	-1.71966	-19.4853	1.22783	0.0126019	-0.154596	-2.61387	O00763
O14497	ARID1A	AT-rich interactive domain-containing protein 1A	26.9324	26.8606	26.7372	26.9611	26.811	26.736	26.961	27.0892	27.0835	0.208533	0.0561587					+	P-BF_Ctrl	19	19	18	11.9	11.9	11	242.04	0	38.951	1732300000	73	0.0283829	1	-0.00737826	-0.0844778	1.33194	0.00959353	0.201178	2.84639	O14497
O14531	DPYSL4	Dihydropyrimidinase-related protein 4	30.3262	30.2492	30.1159	30.2946	30.1621	30.1928	29.2248	29.0233	29.2261	-1.05843	0.00017406					+	P-BF_Ctrl	22	21	21	57.3	56.1	56.1	61.877	0	249.94	16565000000	413	0.0663701	0.974511	-0.0139605	-0.190382	3.52455	0	-1.07239	-11.7629	O14531
O14562	UBFD1	Ubiquitin domain-containing protein UBFD1	29.9686	29.7524	29.7155	28.4962	28.1563	28.2768	27.9744	27.9387	27.9411	-0.358367	0.0232106				+	+	FB-P_Ctrl;P-BF_Ctrl	9	9	9	40.5	40.5	40.5	33.382	0	93.086	8118700000	234	3.53416	0	-1.50236	-11.8297	4.69848	0	-1.86074	-23.3255	O14562
O14579	COPE	Coatomer subunit epsilon	27.8062	27.6036	27.211	26.7778	26.7987	26.6751	27.1511	26.8136	27.0471	0.2534	0.0766919				+		FB-P_Ctrl	12	12	12	63	63	63	34.482	0	75.355	2186700000	88	1.93762	0.00281585	-0.789733	-4.41623	1.25142	0.0120452	-0.536328	-2.6658	O14579
O14617	AP3D1	AP-3 complex subunit delta-1	29.3497	29.3245	29.2831	28.6991	28.5414	28.7995	28.6855	28.7621	28.5985	0.00203333	0.982818				+	+	FB-P_Ctrl;P-BF_Ctrl	23	23	23	27.5	27.5	27.5	130.16	0	178.45	9836200000	253	2.9266	0.000436047	-0.639097	-8.23782	3.62295	0	-0.637052	-12.4644	O14617
O14639	ABLIM1	Actin-binding LIM protein 1	27.7372	27.6122	27.4706	26.7991	26.941	26.8658	26.3734	25.9932	26.125	-0.704767	0.00404192				+	+	FB-P_Ctrl;P-BF_Ctrl	15	15	15	25.4	25.4	25.4	87.687	0	113.13	2365300000	126	2.9703	0.000451807	-0.738015	-8.45776	3.35625	0	-1.44279	-10.6493	O14639
O14640	DVL1	Segment polarity protein dishevelled homolog DVL-1;Putative segment polarity protein dishevelled homolog DVL1P1	27.1776	27.0433	27.0027	25.9571	26.2741	26.0621	26.2291	25.9008	26.1469	-0.0055	0.969617				+	+	FB-P_Ctrl;P-BF_Ctrl	9	7	7	16.7	14	14	75.186	0	32.72	1287600000	42	3.09486	0.00016	-0.976745	-9.11452	3.03221	0	-0.98228	-8.77856	O14640;P54792
O14641	DVL2	Segment polarity protein dishevelled homolog DVL-2	30.1758	30.0933	30.0181	30.376	30.1823	30.2562	29.5836	29.626	29.277	-0.775967	0.00328549					+	P-BF_Ctrl	18	18	15	37	37	31.7	78.947	0	322.83	14113000000	427	1.13998	0.0207064	0.175752	2.42402	2.13861	0.00191827	-0.600198	-5.04283	O14641
O14646	CHD1	Chromodomain-helicase-DNA-binding protein 1	24.9306	24.8558	24.6645	23.6649	23.7394	Not detected	23.7284	Not detected	Not detected	0.02625	#DIV/0!				+		FB-P_Ctrl	5	4	2	4	3.5	2.2	196.69	0	8.4856	217980000	18	2.73643	0.000749686	-1.1148	-10.5192	0	0.9987	-1.0886	0	O14646
O14654	IRS4	Insulin receptor substrate 4	31.0933	30.9188	30.9031	29.5811	29.7309	29.7634	29.8555	29.8766	29.7998	0.152167	0.0660845				+	+	FB-P_Ctrl;P-BF_Ctrl	36	36	36	35.7	35.7	35.7	133.77	0	323.31	28490000000	675	3.98969	0	-1.27994	-15.4508	4.1861	0	-1.12778	-17.3248	O14654
O14735	CDIPT	CDP-diacylglycerol--inositol 3-phosphatidyltransferase	26.803	26.5519	26.4405	27.2296	27.8231	27.7799	26.6742	26.8126	26.6853	-0.886833	0.0106452				+		FB-P_Ctrl	5	5	5	27.2	27.2	27.2	23.539	0	17.417	1889700000	60	2.00554	0.00257857	1.0124	4.62107	0.46834	0.20619	0.125561	1.08195	O14735
O14737	PDCD5	Programmed cell death protein 5	30.5345	30.4224	30.3866	30.6539	30.5652	30.6707	30.1289	30.2899	30.2096	-0.420467	0.00178159				+	+	FB-P_Ctrl;P-BF_Ctrl	7	7	7	45.6	45.6	45.6	14.285	0	189.75	17746000000	291	1.52192	0.00813325	0.182121	3.29527	1.68248	0.00429515	-0.238369	-3.70337	O14737
O14744	PRMT5	Protein arginine N-methyltransferase 5;Protein arginine N-methyltransferase 5, N-terminally processed	27.8434	27.7405	27.7123	26.3815	26.8987	26.8531	26.91	26.6148	26.6217	0.0044	0.982798				+	+	FB-P_Ctrl;P-BF_Ctrl	14	14	14	22.8	22.8	22.8	72.683	0	38.365	2742100000	78	2.46317	0.00158246	-1.05434	-6.19981	3.24848	0	-1.04992	-9.98942	O14744
O14745	SLC9A3R1	Na(+)/H(+) exchange regulatory cofactor NHE-RF1	27.1114	27.053	27.0526	26.7089	26.4467	26.6718	25.9751	26.0426	26.0878	-0.573967	0.00288022				+	+	FB-P_Ctrl;P-BF_Ctrl	7	7	7	28.8	28.8	28.8	38.868	0	42.424	1767500000	97	2.27349	0.00152416	-0.463198	-5.50024	4.9647	0	-1.03714	-27.2106	O14745
O14776	TCERG1	Transcription elongation regulator 1	30.6686	30.6432	30.635	30.5431	30.4772	30.4561	31.2643	31.0918	31.133	0.6709	0.000324223				+	+	FB-P_Ctrl;P-BF_Ctrl	30	30	30	23.6	23.6	23.6	123.9	0	288.23	21586000000	485	2.29626	0.00155009	-0.156762	-5.58062	3.19962	0	0.514099	9.70303	O14776;Q5VWI1
O14828	SCAMP3	Secretory carrier-associated membrane protein 3	27.8782	27.7766	27.7247	26.7709	26.9154	26.4187	26.7817	26.5373	26.4681	-0.105967	0.578579				+	+	FB-P_Ctrl;P-BF_Ctrl	7	7	7	32.9	32.9	32.9	38.287	0	76.925	2519100000	125	2.67691	0.000963855	-1.09153	-7.07682	3.46805	0	-1.19745	-11.3773	O14828
O14908	GIPC1	PDZ domain-containing protein GIPC1	26.8787	26.864	26.8618	26.5297	26.953	27.3661	26.3221	26.2237	26.4046	-0.6328	0.0625441					+	P-BF_Ctrl	11	11	11	45.3	45.3	45.3	36.049	0	35.549	1516300000	55	0.123305	0.890998	0.0814711	0.337331	3.33056	0	-0.551345	-10.4884	O14908;Q8TF64
O14929	HAT1	Histone acetyltransferase type B catalytic subunit	28.4536	28.3876	28.3315	28.9187	28.7877	28.7761	28.1265	28.1317	28.1436	-0.693567	0.000112791				+	+	FB-P_Ctrl;P-BF_Ctrl	8	8	8	28.2	28.2	28.2	49.512	0	102.19	4196600000	163	2.78444	0.000779085	0.436609	7.55758	2.70672	0.000294606	-0.256967	-7.20731	O14929
P19105	MYL12A	Myosin regulatory light chain 12A;Myosin regulatory light chain 12B;Myosin regulatory light polypeptide 9	28.2982	28.2563	28.0054	26.3727	26.3921	26.196	26.5878	26.3235	26.4196	0.123367	0.2819				+	+	FB-P_Ctrl;P-BF_Ctrl	7	7	7	50.9	50.9	50.9	19.794	0	41.05	2746800000	101	4.13964	0	-1.86637	-16.8624	3.88843	0	-1.74303	-14.5634	P19105;O14950;P24844
O14964	HGS	Hepatocyte growth factor-regulated tyrosine kinase substrate	26.558	26.1121	26.046	24.7952	25.2199	25.6609	25.0466	Not detected	Not detected	-0.178733	#DIV/0!				+		FB-P_Ctrl	6	6	6	10.3	10.3	10.3	86.191	0	14.549	770830000	23	1.5682	0.00695618	-1.0134	-3.41001	0	0.999846	-1.19206	0	O14964
O14966	RAB29	Ras-related protein Rab-7L1	27.3871	27.287	27.0088	26.3639	Not detected	26.4021	Not detected	Not detected	26.6041	0.2211	#DIV/0!				+		FB-P_Ctrl	3	3	2	15.8	15.8	10.3	23.155	0.00030211	4.1998	1241600000	10	1.98174	0.00272076	-0.844671	-5.75392	0	0.988527	-0.623519	0	O14966;P57729
O14974	PPP1R12A	Protein phosphatase 1 regulatory subunit 12A	27.6634	27.5731	27.5351	27.5456	27.3846	27.3582	26.4445	26.4918	26.6116	-0.9135	0.000286556					+	P-BF_Ctrl	17	17	17	21	21	21	115.28	0	48.433	2788900000	80	1.08425	0.0247563	-0.161073	-2.30631	4.17017	0	-1.07455	-17.1648	O14974
O14979	HNRNPDL	Heterogeneous nuclear ribonucleoprotein D-like	27.6233	27.261	27.1571	26.2046	26.231	26.0868	27.0893	26.6321	26.6584	0.619133	0.0161005				+		FB-P_Ctrl	6	5	5	14.3	12.4	12.4	46.437	0	19.211	1792200000	85	2.86163	0.00054069	-1.17301	-7.92035	1.26891	0.0111773	-0.553841	-2.70459	O14979
O14980	XPO1	Exportin-1	28.1642	27.7407	27.6962	25.2255	25.7543	Not detected	26.2228	26.3554	26.5262	0.878233	0.0306743				+	+	FB-P_Ctrl;P-BF_Ctrl	16	16	16	19	19	19	123.38	0	41.429	2798800000	98	2.48478	0.00150106	-2.37713	-8.62736	3.00962	0	-1.49888	-8.66024	O14980
O14981	BTAF1	TATA-binding protein-associated factor 172	27.0074	26.9058	26.8339	28.0589	27.9393	28.2752	27.7721	27.3174	27.7265	-0.4858	0.0498762				+	+	FB-P_Ctrl;P-BF_Ctrl	22	22	22	17.1	17.1	17.1	206.89	0	67.589	1995800000	101	3.35509	0.00021286	1.17547	10.6421	1.96748	0.00283357	0.689657	4.50545	O14981
O15027	SEC16A	Protein transport protein Sec16A	27.0926	27.0498	27.0394	26.2751	25.9754	25.9535	26.08	26.2075	26.0922	0.0585667	0.626906				+	+	FB-P_Ctrl;P-BF_Ctrl	18	18	18	12.8	12.8	12.8	251.89	0	40.668	1729200000	77	3.1558	0.000171123	-0.992573	-9.45268	4.54501	0	-0.934016	-21.3407	O15027
O15042	U2SURP	U2 snRNP-associated SURP motif-containing protein	31.0182	30.8193	30.7663	31.4624	31.3895	31.4931	31.4167	31.432	31.3975	-0.0329333	0.365607				+	+	FB-P_Ctrl;P-BF_Ctrl	36	36	36	38.8	38.8	38.8	118.29	0	323.31	27717000000	602	2.66534	0.00108612	0.5804	7.02672	2.67798	0.000510121	0.547493	7.08146	O15042
O15047	SETD1A	Histone-lysine N-methyltransferase SETD1A	25.7121	25.68	25.5986	26.448	26.6661	26.3064	26.5393	26.0853	26.3623	-0.144533	0.439426				+	+	FB-P_Ctrl;P-BF_Ctrl	12	12	12	11.6	11.6	11.6	186.03	0	30.868	728140000	39	2.74255	0.00075443	0.809937	7.36696	2.08813	0.00210272	0.665394	4.87953	O15047
O15056	SYNJ2	Synaptojanin-2	26.3731	26.3367	26.284	26.7176	26.3446	26.5859	25.7056	25.094	25.0262	-1.2741	0.00624209					+	P-BF_Ctrl	16	16	16	16.6	16.6	16.6	165.54	0	29.155	1168500000	44	0.906751	0.0425502	0.218121	1.94299	2.0797	0.00209639	-1.05599	-4.85265	O15056
O15067	PFAS	Phosphoribosylformylglycinamidine synthase	26.9883	26.9391	26.8962	25.2826	26.052	26.0642	Not detected	Not detected	25.4898	-0.3098	#DIV/0!				+		FB-P_Ctrl	10	10	10	11.1	11.1	11.1	144.73	0	31.678	1538000000	54	1.92957	0.00280495	-1.1416	-4.39238	0	0.989648	-1.45135	0	O15067
O15084	ANKRD28	Serine/threonine-protein phosphatase 6 regulatory ankyrin repeat subunit A	26.7308	26.6291	26.5891	25.5964	25.8458	25.8741	25.3435	25.1714	25.7405	-0.353633	0.136527				+	+	FB-P_Ctrl;P-BF_Ctrl	11	11	11	12	12	12	112.96	0	27.549	1325900000	64	3.06911	0.000156352	-0.877563	-8.97507	2.67939	0.000510638	-1.23116	-7.08761	O15084;Q8N8A2
O15144	ARPC2	Actin-related protein 2/3 complex subunit 2	27.2508	26.9182	26.8261	26.5942	26.5575	25.351	Not detected	25.7509	25.9292	-0.327517	0.581315					+	P-BF_Ctrl	7	7	7	33.3	33.3	33.3	34.333	0	12.955	1645200000	42	0.905157	0.0429968	-0.830828	-1.9398	2.12374	0.00190798	-1.15832	-6.46135	O15144
O15160	POLR1C	DNA-directed RNA polymerases I and III subunit RPAC1	26.4035	26.074	25.989	Not detected	Not detected	25.5391	25.2305	25.4668	25.3203	-0.1999	#DIV/0!					+	P-BF_Ctrl	6	6	6	24.3	24.3	24.3	39.249	0	48.788	822080000	47	0	0.944615	-0.616358	0	2.32148	0.00107019	-0.816311	-5.67074	O15160
O15164	TRIM24	Transcription intermediary factor 1-alpha	26.7636	26.3786	26.3114	26.2582	26.1585	26.2349	26.0397	26.0267	26.0982	-0.162333	0.0121207					+	P-BF_Ctrl	11	11	11	14.1	14.1	14.1	116.83	0	26.307	984730000	27	0.863186	0.0496392	-0.26734	-1.85603	1.40453	0.0079224	-0.429678	-3.01392	O15164
O15173	PGRMC2	Membrane-associated progesterone receptor component 2	29.6725	29.5003	29.4426	Not detected	26.1252	26.1915	27.794	27.7738	27.5644	1.55238	0.00054573				+	+	FB-P_Ctrl;P-BF_Ctrl	8	8	8	32.7	32.7	32.7	23.818	0	118.32	7112400000	119	4.34635	0	-3.38016	-36.5498	4.26511	0	-1.82773	-18.1397	O15173
O15212	PFDN6	Prefoldin subunit 6	27.7278	27.644	27.4241	26.6927	26.8451	26.6373	26.3439	26.6834	26.7996	-0.116067	0.482705				+	+	FB-P_Ctrl;P-BF_Ctrl	6	6	6	45	45	45	14.582	0	38.833	2347800000	54	2.86911	0.000544444	-0.873618	-7.95636	2.42027	0.00094386	-0.989686	-6.03547	O15212
O15213	WDR46	WD repeat-containing protein 46	26.2808	26.2087	26.0887	25.2887	25.129	25.0068	25.8807	26.2551	25.9562	0.889167	0.00318731				+		FB-P_Ctrl	6	6	6	17.4	17.4	17.4	68.07	0	25.051	991990000	39	3.35109	0.000211921	-1.05123	-10.6169	0.565389	0.129309	-0.162051	-1.27283	O15213
O15226	NKRF	NF-kappa-B-repressing factor	27.3347	27.2944	27.1899	26.5617	26.9815	26.8748	27.6297	27.1955	27.2877	0.564967	0.0363841				+		FB-P_Ctrl	13	13	13	23.9	23.9	23.9	77.672	0	49.866	2215400000	77	1.60668	0.00596761	-0.466967	-3.50715	0.284432	0.563452	0.0980053	0.705388	O15226
O15260	SURF4	Surfeit locus protein 4	28.368	28.2438	28.2334	27.8362	27.0852	27.632	26.6299	26.5759	26.4886	-0.953	0.0139072				+	+	FB-P_Ctrl;P-BF_Ctrl	5	5	5	22.7	22.7	22.7	30.394	0	96.532	5680900000	114	1.5423	0.00743233	-0.763911	-3.34553	5.06025	0	-1.71692	-28.7558	O15260
O15294	OGT	UDP-N-acetylglucosamine--peptide N-acetylglucosaminyltransferase 110 kDa subunit	28.3608	28.3571	28.3242	29.4895	29.0551	29.191	29.5897	29.2271	29.1599	0.0803667	0.686618				+	+	FB-P_Ctrl;P-BF_Ctrl	23	23	23	28.8	28.8	28.8	116.92	0	173.2	5304100000	204	2.65217	0.00122275	0.897821	6.9701	2.7276	0.000298006	0.978187	7.29996	O15294
O15344	MID1	E3 ubiquitin-protein ligase Midline-1	30.9885	30.2856	30.1147	28.7811	28.6553	28.073	28.9693	28.7544	28.8346	0.349633	0.198258				+	+	FB-P_Ctrl;P-BF_Ctrl	4	4	4	7.5	7.5	7.5	75.25	0	6.9799	12032000000	17	2.32396	0.00145211	-1.95977	-5.67967	2.37425	0.00102389	-1.61016	-5.86324	O15344
O15347	HMGB3	High mobility group protein B3	28.1949	27.9283	27.9247	29.2781	29.3855	29.1533	27.0844	27.3592	28.3794	-1.66463	0.0140806				+		FB-P_Ctrl	7	7	7	28	28	28	22.98	0	15.53	3164000000	67	3.44661	0.000236453	1.25638	11.2341	0.43256	0.245933	-0.408296	-1.01065	O15347
O15371	EIF3D	Eukaryotic translation initiation factor 3 subunit D	28.9941	28.8657	28.7556	28.169	28.3173	28.5889	28.1299	28.4945	28.3713	-0.0265	0.878762				+	+	FB-P_Ctrl;P-BF_Ctrl	15	15	15	30.7	30.7	30.7	63.972	0	72.651	6354600000	201	1.6592	0.00522523	-0.513414	-3.6424	1.87734	0.00336916	-0.539902	-4.24001	O15371
O15381	NVL	Nuclear valosin-containing protein-like	27.7489	27.6135	27.6053	27.9524	27.5038	27.5952	27.516	27.4753	27.4103	-0.2166	0.19747					+	P-BF_Ctrl	17	17	17	26.3	26.3	26.3	95.05	0	115.39	2550100000	133	0.0672276	0.97387	0.0278575	0.192691	1.55662	0.00532264	-0.188728	-3.38108	O15381
O15446	CD3EAP	DNA-directed RNA polymerase I subunit RPA34	26.0097	25.9869	25.8166	25.3323	Not detected	25.3907	25.6126	25.7016	Not detected	0.2956	0.0309246				+	+	FB-P_Ctrl;P-BF_Ctrl	4	4	4	15.9	15.9	15.9	54.985	0	22.082	770940000	37	2.23365	0.00168268	-0.576188	-7.06114	1.3357	0.009476	-0.28063	-3.28752	O15446
O15498	YKT6	Synaptobrevin homolog YKT6	29.9971	29.7725	29.7689	28.3492	28.933	28.8695	28.0492	28.3997	28.4081	-0.431567	0.120711				+	+	FB-P_Ctrl;P-BF_Ctrl	10	10	10	58.6	58.6	58.6	22.417	0	178.83	10026000000	214	2.31616	0.00144519	-1.12894	-5.65165	3.42998	0	-1.56052	-11.1243	O15498
O15541	RNF113A	RING finger protein 113A	27.709	27.5384	27.2728	29.9534	30.0941	29.9368	29.5591	29.6085	29.7376	-0.3597	0.00786763				+	+	FB-P_Ctrl;P-BF_Ctrl	7	7	7	26.8	26.8	26.8	38.787	0	72.677	3888900000	84	4.27494	0	2.48804	18.2436	3.99122	0	2.12837	15.4646	O15541
O43143	DHX15	Pre-mRNA-splicing factor ATP-dependent RNA helicase DHX15	31.1309	31.0278	31.0225	31.0718	31.4061	31.3668	31.5617	31.6203	31.5985	0.311933	0.0432973					+	P-BF_Ctrl	38	38	37	45.5	45.5	44.4	90.932	0	323.31	33618000000	940	0.92902	0.039758	0.221146	1.98774	3.77077	0	0.533076	13.5942	O43143
O43148	RNMT	mRNA cap guanine-N7 methyltransferase	27.6871	27.5281	27.3338	27.8412	27.9413	27.8652	27.9485	28.122	27.9686	0.130467	0.10533				+	+	FB-P_Ctrl;P-BF_Ctrl	11	11	11	28.8	28.8	28.8	54.843	0	32.228	2270100000	104	1.57932	0.00663558	0.366231	3.43792	1.89271	0.00302384	0.496676	4.28446	O43148
O43169	CYB5B	Cytochrome b5 type B	26.1288	25.9437	25.8811	Not detected	24.3972	23.9862	24.0576	Not detected	Not detected	-0.1341	#DIV/0!				+		FB-P_Ctrl	3	3	3	36.7	36.7	36.7	16.694	0	36.165	563170000	38	2.66147	0.00122857	-1.79289	-9.91799	0	0.994164	-1.92699	0	O43169
O43172	PRPF4	U4/U6 small nuclear ribonucleoprotein Prp4	29.0534	29.0493	29	29.8357	29.4994	29.6922	29.8577	29.6892	29.7614	0.0936667	0.438494				+	+	FB-P_Ctrl;P-BF_Ctrl	15	15	15	31.8	31.8	31.8	58.449	0	112.3	7845000000	260	2.53576	0.00123381	0.641529	6.48654	3.84651	0	0.735231	14.2107	O43172
O43175	PHGDH	D-3-phosphoglycerate dehydrogenase	29.1388	29.1117	29.0905	28.3832	28.0088	28.0082	28.1468	28.4312	28.1238	0.100533	0.562215				+	+	FB-P_Ctrl;P-BF_Ctrl	9	9	9	20.8	20.8	20.8	56.65	0	133.29	7563000000	209	2.83632	0.000678426	-0.980278	-7.79975	3.03854	0	-0.879754	-8.81197	O43175
O43237	DYNC1LI2	Cytoplasmic dynein 1 light intermediate chain 2	27.7436	27.631	27.5988	27.0254	27.1998	27.0756	26.3937	26.3543	26.6827	-0.623367	0.00575262				+	+	FB-P_Ctrl;P-BF_Ctrl	13	13	13	37.4	37.4	37.4	54.099	0	73.16	2681200000	78	2.92082	0.000434153	-0.55755	-8.20912	3.33269	0	-1.18089	-10.5017	O43237
O43242	PSMD3	26S proteasome non-ATPase regulatory subunit 3	30.5142	30.51	30.4587	29.5367	29.6605	29.6449	29.3995	29.487	29.4567	-0.1663	0.0234372				+	+	FB-P_Ctrl;P-BF_Ctrl	24	24	24	49.8	49.8	49.8	60.977	0	274.38	18224000000	637	4.47974	0	-0.88026	-20.5479	5.32369	0	-1.04656	-33.4824	O43242
O43290	SART1	U4/U6.U5 tri-snRNP-associated protein 1	29.904	29.8732	29.8428	30.2597	30.2245	30.2954	30.4048	30.2651	30.393	0.0944333	0.127307				+	+	FB-P_Ctrl;P-BF_Ctrl	29	29	29	44.2	44.2	44.2	90.254	0	323.31	13723000000	366	3.85651	0	0.386531	14.2941	3.24996	0	0.480981	9.99823	O43290
O43314	PPIP5K2	Inositol hexakisphosphate and diphosphoinositol-pentakisphosphate kinase 2	27.1531	27.1319	27.0645	26.8386	26.6934	26.9187	26.1563	25.9918	25.8968	-0.801933	0.00133524				+	+	FB-P_Ctrl;P-BF_Ctrl	13	13	13	13.4	13.4	13.4	140.41	0	50.918	1568000000	54	1.86744	0.00306435	-0.299604	-4.21154	3.78447	0	-1.10148	-13.7038	O43314;Q6PFW1
O43318	MAP3K7	Mitogen-activated protein kinase kinase kinase 7	26.5012	26.4599	26.4489	26.6398	25.9838	26.4391	25.6763	25.6635	25.5949	-0.709333	0.0222682					+	P-BF_Ctrl	9	9	9	20.8	20.8	20.8	67.195	0	27.542	1000600000	21	0.233483	0.684294	-0.115769	-0.594554	4.9904	0	-0.825073	-27.6179	O43318
O43324	EEF1E1	Eukaryotic translation elongation factor 1 epsilon-1	27.5448	27.445	27.3596	25.8981	25.954	26.0418	26.7636	26.6996	26.6857	0.751667	9.88302e-05				+	+	FB-P_Ctrl;P-BF_Ctrl	8	8	8	50.6	50.6	50.6	19.81	0	49.64	2107600000	93	4.58675	0	-1.48518	-21.8633	3.62871	0	-0.733511	-12.5067	O43324
O43390	HNRNPR	Heterogeneous nuclear ribonucleoprotein R	29.9334	29.5287	29.512	28.3615	28.1192	28.332	28.8178	28.4879	28.4948	0.329267	0.0684334				+	+	FB-P_Ctrl;P-BF_Ctrl	20	16	16	33.5	29.1	29.1	70.942	0	89.487	8800000000	231	3.03773	0.000477707	-1.38717	-8.80769	2.41765	0.000941382	-1.05789	-6.02556	O43390
O43395	PRPF3	U4/U6 small nuclear ribonucleoprotein Prp3	29.4026	29.3053	29.3009	29.9697	29.7153	29.7387	30.0576	29.7079	29.7565	0.0327667	0.821719				+	+	FB-P_Ctrl;P-BF_Ctrl	22	22	22	38.7	38.7	38.7	77.528	0	160.41	9446200000	331	2.23831	0.00169035	0.471621	5.37789	1.93661	0.00294496	0.504425	4.41323	O43395
O43396	TXNL1	Thioredoxin-like protein 1	34.1409	34.1062	34.0769	29.5804	30.1648	30.0321	27.0574	26.7152	27.5112	-2.83117	0.000621481				+	+	FB-P_Ctrl;P-BF_Ctrl	18	18	18	60.2	60.2	60.2	32.251	0	323.31	1078200000000000	841	4.71255	0	-4.18224	-23.5165	5.15213	0	-7.01343	-30.3238	O43396
O43399	TPD52L2	Tumor protein D54	27.5422	27.4885	27.4734	28.1259	27.5339	27.8273	26.7062	26.7127	26.729	-1.11307	0.00287696					+	P-BF_Ctrl	9	9	9	66.5	66.5	66.5	22.237	0	74.363	2751900000	114	0.886781	0.0460774	0.327679	1.90304	5.43982	0	-0.785395	-35.8037	O43399
O43426	SYNJ1	Synaptojanin-1	28.7173	28.6561	28.6151	28.7735	28.5322	28.5814	28.0939	27.9686	27.8931	-0.643833	0.00238436					+	P-BF_Ctrl	32	32	32	27.4	27.4	27.4	173.1	0	106.76	5700700000	273	0.159452	0.832771	-0.0337391	-0.424997	3.30349	0	-0.677621	-10.3213	O43426
O43432	EIF4G3	Eukaryotic translation initiation factor 4 gamma 3	30.2192	30.2073	30.1054	29.2227	29.1302	29.2719	28.5523	28.6986	28.6616	-0.570767	0.000701609				+	+	FB-P_Ctrl;P-BF_Ctrl	34	31	31	24.7	23.2	23.2	176.65	0	164.91	14821000000	285	4.21334	0	-0.969	-17.6015	4.95614	0	-1.53981	-27.0762	O43432
O43482	OIP5	Protein Mis18-beta	26.579	26.5593	26.5358	26.6411	26.7532	26.6223	26.0407	25.8375	26.057	-0.6938	0.00104836					+	P-BF_Ctrl	4	4	4	35.4	35.4	35.4	24.691	0	22.626	1154300000	60	1.25437	0.0146205	0.114162	2.67231	2.89483	0.000110472	-0.579613	-8.08117	O43482
O43491	EPB41L2	Band 4.1-like protein 2	31.8072	31.7909	31.7688	30.3757	30.1383	30.347	29.7818	29.5315	29.5816	-0.655367	0.00359631				+	+	FB-P_Ctrl;P-BF_Ctrl	46	46	42	53.9	53.9	50.6	112.59	0	323.31	50132000000	881	4.42147	0	-1.50196	-19.8646	5.00927	0	-2.15732	-27.9208	O43491
O43583	DENR	Density-regulated protein	26.4649	26.4589	26.3168	25.6709	25.9608	25.1845	25.7294	25.6224	25.5146	0.0167333	0.94661				+	+	FB-P_Ctrl;P-BF_Ctrl	4	4	4	22.7	22.7	22.7	22.092	0	139.26	859450000	55	1.59982	0.0064404	-0.808154	-3.48973	3.2603	0	-0.791392	-10.0599	O43583
O43592	XPOT	Exportin-T	27.2003	27.1123	26.9837	26.228	26.1179	26.1984	26.0709	25.643	26.1627	-0.222567	0.245032				+	+	FB-P_Ctrl;P-BF_Ctrl	13	13	13	15.9	15.9	15.9	109.96	0	64.774	1715200000	131	3.68455	0	-0.917335	-12.9238	2.56991	0.000652133	-1.13991	-6.62531	O43592
O43615	TIMM44	Mitochondrial import inner membrane translocase subunit TIM44	26.7308	26.5831	26.5276	24.9912	25.1348	24.7491	25.8768	25.4943	24.9856	0.493867	0.154326				+	+	FB-P_Ctrl;P-BF_Ctrl	9	9	9	24.1	24.1	24.1	51.355	0	18.908	930400000	41	3.68815	0	-1.65544	-12.9511	1.92554	0.0029303	-1.16156	-4.3805	O43615
O43684	BUB3	Mitotic checkpoint protein BUB3	30.6545	30.3092	30.2229	30.5112	30.382	30.3387	30.7767	30.8192	30.7998	0.387933	0.00188679					+	P-BF_Ctrl	12	12	12	39	39	39	37.154	0	177.58	18958000000	401	0.0360367	1	0.0150789	0.106421	1.41691	0.00760071	0.40305	3.04297	O43684
O43707	ACTN4	Alpha-actinin-4	29.3803	29.366	29.3388	28.1347	28.339	28.6927	27.9559	27.4946	27.8129	-0.634333	0.0405307				+	+	FB-P_Ctrl;P-BF_Ctrl	29	29	29	42.2	42.2	42.2	104.85	0	210.59	9100300000	294	2.39815	0.00152056	-0.972851	-5.95215	3.52167	0	-1.6072	-11.743	O43707;P12814;P35609;Q08043;Q9H254
O43709	WBSCR22	Probable 18S rRNA (guanine-N(7))-methyltransferase	28.1662	28.0015	27.3415	26.0246	26.1334	26.3844	27.2013	27.2329	27.6258	1.17253	0.0024832				+		FB-P_Ctrl	6	6	6	29.5	29.5	29.5	31.88	0	27.136	2235800000	58	2.42448	0.00153597	-1.6556	-6.05143	0.776809	0.0539788	-0.483075	-1.68545	O43709
O43719	HTATSF1	HIV Tat-specific factor 1	27.6949	27.4991	27.4785	28.236	28.1574	28.2864	28.467	27.7647	27.4473	-0.3336	0.333544				+		FB-P_Ctrl	15	15	15	26.2	26.2	26.2	85.852	0	161.94	2441400000	112	2.98298	0.000458015	0.669076	8.52259	0.470077	0.204435	0.335447	1.0854	O43719
O43768	ENSA	Alpha-endosulfine	29.7719	29.72	29.5149	28.8676	29.2389	29.5019	28.8315	28.3639	28.6757	-0.5791	0.0652602					+	P-BF_Ctrl	12	12	11	75.2	75.2	66.1	13.389	0	323.31	10175000000	185	1.09566	0.023897	-0.466119	-2.33025	2.56453	0.000650284	-1.04519	-6.60325	O43768
O43795	MYO1B	Unconventional myosin-Ib	27.9197	27.8284	27.7115	26.0506	26.5996	Not detected	26.3242	26.4501	Not detected	0.06205	0.846062				+	+	FB-P_Ctrl;P-BF_Ctrl	15	15	15	18.9	18.9	18.9	131.98	0	139.99	2904800000	69	2.19216	0.0018388	-1.49482	-6.82906	3.2564	0	-1.43276	-15.7716	O43795;Q9UBC5
O43809	NUDT21	Cleavage and polyadenylation specificity factor subunit 5	31.1796	31.1025	31.0519	31.5143	31.5604	31.5759	31.602	31.5465	31.5622	0.0200333	0.464508				+	+	FB-P_Ctrl;P-BF_Ctrl	16	16	16	67.8	67.8	67.8	26.227	0	292.16	33259000000	491	3.3452	0.000209607	0.438843	10.5799	3.45554	0	0.458918	11.2936	O43809
O43913	ORC5	Origin recognition complex subunit 5	24.992	24.9625	24.922	24.8658	Not detected	Not detected	25.76	25.4666	25.3872	0.672133	#DIV/0!					+	P-BF_Ctrl	5	5	5	12.9	12.9	12.9	50.282	0	9.4292	406370000	15	0	0.955128	-0.0930805	0	2.13383	0.00191385	0.57909	5.0272	O43913
O60231	DHX16	Putative pre-mRNA-splicing factor ATP-dependent RNA helicase DHX16	28.0921	27.9844	27.9837	28.8794	28.8747	28.9108	28.8062	28.6296	28.8244	-0.1349	0.0995045				+	+	FB-P_Ctrl;P-BF_Ctrl	26	25	25	30.5	29.7	29.7	119.26	0	247.63	4007100000	212	4.6731	0	0.868225	22.9851	3.28554	0	0.733318	10.2119	O60231
O60256	PRPSAP2	Phosphoribosyl pyrophosphate synthase-associated protein 2	27.063	27.0263	27.0263	25.8134	26.3879	26.2109	25.5756	25.8887	26.1074	-0.280167	0.28921				+	+	FB-P_Ctrl;P-BF_Ctrl	8	8	7	29.8	29.8	26	40.925	0	81.4	1726100000	84	2.21321	0.00166011	-0.901158	-5.29192	2.80018	0.000105263	-1.18132	-7.63031	O60256
O60264	SMARCA5	SWI/SNF-related matrix-associated actin-dependent regulator of chromatin subfamily A member 5	31.7433	31.728	31.6748	31.2628	31.1115	31.1747	31.6746	31.5083	31.5621	0.398667	0.00373916				+		FB-P_Ctrl	50	50	37	45.8	45.8	35.8	121.9	0	323.31	45038000000	1023	3.40633	0.000229665	-0.532386	-10.9698	1.1818	0.0149751	-0.133727	-2.51371	O60264
O60271	SPAG9	C-Jun-amino-terminal kinase-interacting protein 4	30.3553	30.2335	30.1992	29.4109	29.7081	29.4036	28.9762	28.6166	28.8704	-0.686467	0.00939453				+	+	FB-P_Ctrl;P-BF_Ctrl	39	39	39	39.7	39.7	39.7	146.2	0	275.7	17581000000	360	2.61397	0.00119031	-0.75515	-6.80809	3.60708	0	-1.44161	-12.3486	O60271;Q9UPT6
O60341	KDM1A	Lysine-specific histone demethylase 1A	27.7165	27.5138	27.4624	28.8561	28.7793	28.6731	29.3687	28.9533	29.0468	0.353433	0.060782				+	+	FB-P_Ctrl;P-BF_Ctrl	22	22	22	42.3	42.3	42.3	92.902	0	218.45	3424000000	172	3.67141	0	1.20522	12.8245	3.33979	0	1.55869	10.546	O60341
O60443	DFNA5	Non-syndromic hearing impairment protein 5	25.2292	25.1439	24.8823	25.1676	25.3713	25.1982	24.2947	24.1739	24.2391	-1.0098	0.000153185					+	P-BF_Ctrl	4	4	4	11.5	11.5	11.5	54.554	0	8.7721	415500000	25	0.586922	0.141481	0.160585	1.31488	2.81879	0.000106312	-0.849232	-7.71713	O60443
O60493	SNX3	Sorting nexin-3	26.0002	25.8969	25.8229	24.2327	24.7429	24.7911	24.5988	24.3976	24.5467	-0.0745333	0.712787				+	+	FB-P_Ctrl;P-BF_Ctrl	3	3	3	19.1	19.1	19.1	18.762	0	15.211	563380000	30	2.67955	0.000965018	-1.31774	-7.0883	4.2102	0	-1.3923	-17.5694	O60493
O60502	MGEA5	Protein O-GlcNAcase	27.6621	27.6518	27.5721	27.545	27.5625	27.4672	26.9298	27.0525	27.4092	-0.3944	0.0547798					+	P-BF_Ctrl	11	11	11	15.5	15.5	15.5	102.91	0	24.509	2807000000	76	1.19472	0.0177087	-0.103796	-2.54167	1.56387	0.00515985	-0.498205	-3.39918	O60502
O60506	SYNCRIP	Heterogeneous nuclear ribonucleoprotein Q	32.1055	31.8143	31.7877	30.1768	30.3927	30.5608	31.0278	30.8403	30.9854	0.5744	0.0100105				+	+	FB-P_Ctrl;P-BF_Ctrl	23	23	19	43.2	43.2	38.7	69.602	0	323.31	41559000000	775	3.27074	0.000189723	-1.52573	-10.1225	2.91118	0.00011124	-0.951342	-8.16144	O60506
O60563	CCNT1	Cyclin-T1	29.7014	29.6541	29.5466	30.9153	30.5717	30.6411	30.8693	30.6246	30.71	0.0252667	0.852078				+	+	FB-P_Ctrl;P-BF_Ctrl	18	18	16	33.7	33.7	29.6	80.684	0	212.22	11078000000	314	3.14531	0.000169611	1.07533	9.39366	3.68599	0	1.10058	12.9348	O60563
O60566	BUB1B	Mitotic checkpoint serine/threonine-protein kinase BUB1 beta	28.4312	28.3634	28.3573	28.1851	28.2127	28.2184	26.9148	27.0432	27.0677	-1.19683	1.60255e-05				+	+	FB-P_Ctrl;P-BF_Ctrl	23	23	23	29.6	29.6	29.6	119.54	0	142.4	4874100000	204	2.64103	0.00121412	-0.178584	-6.92253	4.88251	0	-1.37538	-25.9474	O60566
O60573	EIF4E2	Eukaryotic translation initiation factor 4E type 2	27.6275	27.6271	27.5063	25.9075	26.6834	27.0221	25.9304	26.4449	26.5845	-0.217733	0.602122				+	+	FB-P_Ctrl;P-BF_Ctrl	6	6	6	34.3	34.3	34.3	28.362	0	31.688	2302100000	55	1.46497	0.00909114	-1.04928	-3.15711	2.47438	0.00079276	-1.26704	-6.24338	O60573
O60610	DIAPH1	Protein diaphanous homolog 1	27.3174	26.8461	25.5592	25.2156	24.6748	24.2309	Not detected	25.2861	24.4497	0.1608	0.760604				+		FB-P_Ctrl	9	9	9	7.6	7.6	7.6	141.35	0	17.528	431630000	18	1.45127	0.00929975	-1.86718	-3.12435	0.973158	0.0275	-1.70635	-2.2857	O60610
O60645	EXOC3	Exocyst complex component 3	27.167	27.1035	27.0117	26.103	25.6936	25.7428	Not detected	24.9927	25.3236	-0.688317	0.0450294				+	+	FB-P_Ctrl;P-BF_Ctrl	13	13	13	20.5	20.5	20.5	85.566	0	22.911	1808800000	76	3.0973	0.000160267	-1.2476	-9.12788	3.1205	0	-1.93592	-14.1935	O60645
O60664	PLIN3	Perilipin-3	28.4713	28.4628	28.4592	28.8089	28.4834	28.6786	28.1601	28.0727	28.0461	-0.564	0.0049819					+	P-BF_Ctrl	14	14	14	53.9	53.9	53.9	47.074	0	167.8	6092700000	232	0.952142	0.0371771	0.192565	2.03442	3.3701	0	-0.371472	-10.7371	O60664
O60684	KPNA6	Importin subunit alpha-7	27.1327	27.1146	27.0089	27.166	27.1676	27.2641	26.8195	26.4807	26.4839	-0.604533	0.00666402					+	P-BF_Ctrl	9	9	4	19.8	19.8	11.2	60.029	0	205.67	1836700000	64	1.06075	0.0266054	0.113815	2.25724	1.83857	0.00354026	-0.490721	-4.12931	O60684
O60716	CTNND1	Catenin delta-1	27.9123	27.9095	27.8138	27.1184	27.0669	26.9702	27.072	26.861	26.9242	-0.0994333	0.261568				+	+	FB-P_Ctrl;P-BF_Ctrl	15	15	15	21.6	21.6	21.6	108.17	0	95.227	3562000000	141	3.96746	0	-0.826717	-15.2516	3.71421	0	-0.926129	-13.1507	O60716
O60749	SNX2	Sorting nexin-2	28.3171	28.2908	28.2187	26.541	27.2939	27.5573	27.3148	26.93	27.2115	0.0213667	0.950812				+	+	FB-P_Ctrl;P-BF_Ctrl	15	13	13	34.3	30.3	30.3	58.47	0	111.85	4051900000	102	1.6972	0.00488231	-1.14484	-3.74226	3.15793	0	-1.12344	-9.46473	O60749
O60762	DPM1	Dolichol-phosphate mannosyltransferase subunit 1	26.4778	26.3334	26.2486	25.1325	25.1108	25.4916	Not detected	Not detected	23.9679	-1.27707	#DIV/0!				+		FB-P_Ctrl	5	5	5	27.7	27.7	27.7	29.634	0	34.99	961590000	48	2.85592	0.000537723	-1.10829	-7.89299	0	1	-2.38537	0	O60762
O60763	USO1	General vesicular transport factor p115	27.5179	27.1983	27.1951	26.0638	26.0566	26.2869	Not detected	Not detected	Not detected	#DIV/0!	#DIV/0!				+		FB-P_Ctrl	9	9	9	12.2	12.2	12.2	107.89	0	109.64	1813600000	57	3.0572	0.000154589	-1.16797	-8.91121	0	1	Not detected	0	O60763
Q99880	HIST1H2BL	Histone H2B type 1-L;Histone H2B type 1-M;Histone H2B type 1-N;Histone H2B type 1-H;Histone H2B type 2-F;Histone H2B type 1-C/E/F/G/I;Histone H2B type 1-D;Histone H2B type F-S;Histone H2B type 1-K;Histone H2B type 1-A	32.9863	32.7853	32.6185	30.7852	30.3679	30.1076	31.3649	31.3365	31.4932	0.977967	0.00856027				+	+	FB-P_Ctrl;P-BF_Ctrl	6	2	2	41.3	7.9	7.9	13.952	0	10.973	65490000000	204	3.34862	0.000210989	-2.37644	-10.6013	3.55535	0	-1.39845	-11.9783	Q99880;Q99879;Q99877;Q93079;Q5QNW6;P62807;P58876;P57053;O60814;Q96A08;A0A2R8Y619
O60826	CCDC22	Coiled-coil domain-containing protein 22	26.1512	26.1215	26.1161	27.0822	25.8864	26.4068	29.9805	29.7606	29.9813	3.449	0.000620663					+	P-BF_Ctrl	20	20	20	41.6	41.6	41.6	70.755	0	165.36	1651100000	121	0.402138	0.323386	0.328846	0.949457	6.04929	0	3.77781	50.884	O60826
O60828	PQBP1	Polyglutamine-binding protein 1	26.1981	25.9388	25.8423	27.2135	27.1561	26.9294	26.9937	27.3866	27.123	0.0681	0.662048				+	+	FB-P_Ctrl;P-BF_Ctrl	6	6	6	37.4	37.4	37.4	30.472	0	96.837	845940000	53	2.89217	0.000555241	1.10664	8.0682	2.76775	0.000202151	1.17466	7.48111	O60828
O60832	DKC1	H/ACA ribonucleoprotein complex subunit 4	29.3731	29.364	29.2384	28.9133	28.7235	28.8875	29.2137	29	29.2562	0.3152	0.0334931				+		FB-P_Ctrl	17	17	17	38.3	38.3	38.3	57.673	0	90.027	8399800000	191	2.55629	0.0011505	-0.483744	-6.56966	0.867371	0.0389943	-0.16855	-1.86435	O60832
O60841	EIF5B	Eukaryotic translation initiation factor 5B	30.0562	29.9892	29.8821	29.0307	28.8657	29.0695	28.8931	28.8777	28.77	-0.1417	0.126142				+	+	FB-P_Ctrl;P-BF_Ctrl	30	30	30	32.5	32.5	32.5	138.83	0	202.31	13677000000	420	3.59617	0	-0.9872	-12.2697	4.22246	0	-1.12889	-17.6952	O60841
O60869	EDF1	Endothelial differentiation-related factor 1	32.8335	32.5538	32.1608	30.8244	31.1122	30.8184	31.8065	32.2085	32.012	1.09067	0.0019595				+		FB-P_Ctrl	8	8	8	43.9	43.9	43.9	16.368	0	134.66	57079000000	347	2.73509	0.000746867	-1.59769	-7.33345	1.04919	0.0213062	-0.506994	-2.23322	O60869
O60870	KIN	DNA/RNA-binding protein KIN17	27.8606	27.4032	27.2991	27.3621	27.1308	26.1536	26.3366	26.0842	25.8775	-0.782733	0.117513					+	P-BF_Ctrl	7	7	7	20.6	20.6	20.6	45.373	0	18.517	2208400000	54	0.714594	0.0853473	-0.63881	-1.56369	2.54695	0.000644799	-1.42156	-6.53172	O60870
O60884	DNAJA2	DnaJ homolog subfamily A member 2	29.167	28.8906	28.8376	28.3911	28.1256	28.2264	28.6879	28.2153	28.4177	0.1926	0.287848				+	+	FB-P_Ctrl;P-BF_Ctrl	11	11	11	34.5	34.5	34.5	45.745	0	49.58	6454400000	173	2.30123	0.0015545	-0.717336	-5.59827	1.42925	0.00743839	-0.524732	-3.07206	O60884
O60885	BRD4	Bromodomain-containing protein 4	30.6928	30.6586	30.5791	31.5581	31.3694	31.5475	32.028	31.9049	31.8385	0.432133	0.00638608				+	+	FB-P_Ctrl;P-BF_Ctrl	34	34	28	32.2	32.2	28.3	152.22	0	323.31	26937000000	542	3.57779	0	0.848166	12.1377	4.40851	0	1.28026	19.7157	O60885;Q58F21
O60925	PFDN1	Prefoldin subunit 1	27.6418	27.535	27.4796	27.2077	27.2489	27.0434	27.1876	27.3399	26.8006	-0.0573	0.756244				+		FB-P_Ctrl	5	5	5	37.7	37.7	37.7	14.21	0	35.905	2398900000	42	2.09271	0.00234841	-0.385443	-4.89417	1.24156	0.0121124	-0.442731	-2.64405	O60925
O60934	NBN	Nibrin	27.4554	27.4515	27.4124	28.6651	28.4248	28.2872	28.3156	28.087	28.1381	-0.2788	0.0992235				+	+	FB-P_Ctrl;P-BF_Ctrl	17	17	17	35.4	35.4	35.4	84.958	0	64.316	2815700000	141	3.10303	0.000160804	1.01923	9.15922	3.33007	0	0.740465	10.4854	O60934
O60942	RNGTT	mRNA-capping enzyme;Polynucleotide 5-triphosphatase;mRNA guanylyltransferase	27.7108	27.6028	27.3436	27.3395	28.0152	27.9164	28.1892	28.0174	28.2133	0.382933	0.156071					+	P-BF_Ctrl	14	14	14	29.6	29.6	29.6	68.556	0	71.358	1920100000	81	0.359576	0.398641	0.204653	0.862729	2.02887	0.00252103	0.587579	4.693	O60942
O75027	ABCB7	ATP-binding cassette sub-family B member 7, mitochondrial	25.5039	25.3941	25.3296	Not detected	22.7331	Not detected	23.1609	23.3113	23.5652	0.6127	#DIV/0!					+	P-BF_Ctrl	3	3	3	4.7	4.7	4.7	82.64	0.00031898	5.0302	434930000	32	0	0.942644	-2.67614	0	4.05587	0	-2.06338	-16.059	O75027
O75113	N4BP1	NEDD4-binding protein 1	29.1248	29.0844	29.0319	29.6006	29.4405	29.6443	29.5737	29.3065	29.3341	-0.157033	0.209274				+	+	FB-P_Ctrl;P-BF_Ctrl	28	28	28	44.5	44.5	44.5	100.38	0	318.33	8357300000	279	2.68914	0.000857491	0.481459	7.13009	1.66025	0.00435287	0.324398	3.64515	O75113
O75131	CPNE3	Copine-3	27.2811	26.6909	26.6771	26.909	26.0032	26.016	26.0676	26.0553	26.178	-0.2091	0.527245					+	P-BF_Ctrl	6	5	5	11.5	9.9	9.9	60.13	0	8.2752	1368900000	26	0.73006	0.0806194	-0.573636	-1.5939	1.74057	0.00411625	-0.782739	-3.85834	O75131;Q96FN4;Q96A23;O95741;Q9UBL6
O75150	RNF40	E3 ubiquitin-protein ligase BRE1B	28.5006	28.0735	27.9829	28.8508	28.3789	28.4583	28.9064	28.9593	28.5975	0.2584	0.233774					+	P-BF_Ctrl	25	25	22	33	33	30	113.68	0	102.48	3630500000	154	0.806372	0.0607517	0.377001	1.74359	1.50371	0.00618978	0.635403	3.25075	O75150
O75153	CLUH	Clustered mitochondria protein homolog	27.134	27.1302	27.1201	25.3272	Not detected	26.167	Not detected	Not detected	Not detected	#DIV/0!	#DIV/0!				+		FB-P_Ctrl	16	16	16	14.2	14.2	14.2	146.67	0	23.693	1888900000	63	1.66538	0.00525802	-1.38095	-4.41178	0	1	Not detected	0	O75153;Q9Y5I4
O75165	DNAJC13	DnaJ homolog subfamily C member 13	25.6461	25.4867	25.3316	24.1382	24.3533	24.4369	24.2021	24.4251	24.3387	0.0125	0.915104				+	+	FB-P_Ctrl;P-BF_Ctrl	7	7	7	4.4	4.4	4.4	254.41	0	10.415	458900000	33	3.12355	0.000164948	-1.17869	-9.27235	3.32399	0	-1.16618	-10.4476	O75165
O75179	ANKRD17	Ankyrin repeat domain-containing protein 17	29.1594	29.1002	29.0781	28.3514	28.233	28.0931	27.9464	27.852	27.8107	-0.356133	0.0136818				+	+	FB-P_Ctrl;P-BF_Ctrl	33	20	20	18.3	12.5	12.5	274.25	0	146.37	7633200000	231	3.45564	0	-0.886712	-11.2942	4.91805	0	-1.24288	-26.4862	O75179
O75182	SIN3B	Paired amphipathic helix protein Sin3b	28.0335	27.9927	27.6465	28.3787	28.2874	28.4455	29.158	29.1568	29.1463	0.783167	6.96318e-05				+	+	FB-P_Ctrl;P-BF_Ctrl	28	28	28	30.2	30.2	30.2	133.06	0	122.13	3271100000	144	1.66613	0.00526169	0.479635	3.66049	3.29705	0	1.26282	10.2819	O75182
O75340	PDCD6	Programmed cell death protein 6	26.6667	26.6294	26.5634	25.4563	25.0674	25.3838	25.5083	25.8449	25.5616	0.335767	0.101741				+	+	FB-P_Ctrl;P-BF_Ctrl	3	3	3	17.8	17.8	17.8	21.868	0	12.496	1143300000	69	3.36332	0.000216216	-1.31732	-10.6941	3.07884	0	-0.981556	-9.02752	O75340
O75348	ATP6V1G1	V-type proton ATPase subunit G 1;V-type proton ATPase subunit G 2	26.0685	25.7512	25.6603	Not detected	24.4539	25.1002	Not detected	Not detected	Not detected	#DIV/0!	#DIV/0!				+		FB-P_Ctrl	2	2	2	22	22	22	13.757	0	19.868	569770000	50	1.44422	0.00941798	-1.04963	-3.63147	0	1	Not detected	0	O75348;O95670
O75352	MPDU1	Mannose-P-dolichol utilization defect 1 protein	26.5716	26.1807	26.1446	24.8472	25.0896	24.7953	Not detected	Not detected	Not detected	#DIV/0!	#DIV/0!				+		FB-P_Ctrl	3	3	3	13.8	13.8	13.8	26.638	0	17.276	898420000	33	2.9713	0.000452489	-1.38825	-8.46287	0	1	Not detected	0	O75352
O75362	ZNF217	Zinc finger protein 217	24.9891	24.9021	24.8379	25.2943	Not detected	25.6901	26.8023	25.8515	25.9705	0.7159	0.181691				+	+	FB-P_Ctrl;P-BF_Ctrl	7	7	7	9.2	9.2	9.2	115.27	0	27.297	406980000	18	1.46116	0.00913203	0.582516	3.6873	1.89655	0.00296275	1.29842	4.29561	O75362
O75367	H2AFY	Core histone macro-H2A.1	30.2387	30.0545	29.9176	28.8299	28.8717	28.881	29.7093	29.8096	29.6832	0.873167	3.04758e-05				+	+	FB-P_Ctrl;P-BF_Ctrl	11	11	9	41.1	41.1	34.1	39.617	0	83.545	12991000000	409	3.67056	0	-1.20935	-12.8181	1.53967	0.00550123	-0.336211	-3.33901	O75367
O75369	FLNB	Filamin-B	31.701	31.6095	31.5665	31.2304	30.9174	31.0144	30.3417	30.3635	30.4705	-0.662167	0.002769				+	+	FB-P_Ctrl;P-BF_Ctrl	84	74	73	42.5	39.7	39.1	278.16	0	323.31	38545000000	1119	2.3239	0.00145072	-0.571573	-5.67945	4.59401	0	-1.23372	-21.9555	O75369
O75376	NCOR1	Nuclear receptor corepressor 1	26.5744	26.5492	26.5365	28.8438	27.8524	28.587	29.4058	28.4003	28.9193	0.480733	0.311526				+	+	FB-P_Ctrl;P-BF_Ctrl	26	26	25	14	14	13.6	270.21	0	141.01	2008800000	75	2.49018	0.00131343	1.87431	6.30522	2.89991	0.000110855	2.35504	8.10605	O75376;Q9H4R4
O75381	PEX14	Peroxisomal membrane protein PEX14	28.6976	28.6081	28.5884	27.308	27.3988	27.2999	27.6091	27.2883	27.4799	0.123533	0.277805				+	+	FB-P_Ctrl;P-BF_Ctrl	11	11	11	43	43	43	41.236	0	76.229	5223400000	124	5.01774	0	-1.29583	-28.0579	3.53474	0	-1.17227	-11.8338	O75381
O75390	CS	Citrate synthase, mitochondrial	27.7294	27.5985	27.4647	27.0506	27.2054	26.9439	26.2458	27.1226	26.8977	-0.311267	0.31888				+	+	FB-P_Ctrl;P-BF_Ctrl	10	10	10	29	29	29	51.712	0	50.695	2076800000	80	2.10366	0.00236226	-0.53089	-4.92932	1.43084	0.0074428	-0.842164	-3.07583	O75390
O75391	SPAG7	Sperm-associated antigen 7	28.253	28.0318	27.8755	29.4277	29.1911	29.1662	29.0866	28.8767	29.0586	-0.254367	0.0746992				+	+	FB-P_Ctrl;P-BF_Ctrl	11	11	11	46.7	46.7	46.7	26.034	0	158.14	3962000000	137	3.03227	0.00047619	1.20823	8.77888	2.76419	0.000304394	0.953856	7.46489	O75391
O75396	SEC22B	Vesicle-trafficking protein SEC22b	25.9072	25.8375	25.8075	25.4964	25.1648	25.6418	25.2682	24.7688	Not detected	-0.415833	0.208663					+	P-BF_Ctrl	4	4	4	25.6	25.6	25.6	24.74	0	78.243	940290000	63	1.34989	0.0117936	-0.41641	-2.88739	1.65693	0.0043389	-0.832223	-4.37979	O75396
O75398	DEAF1	Deformed epidermal autoregulatory factor 1 homolog	24.8865	24.6015	24.555	25.2661	25.2109	25.2585	26.1659	26.1985	26.1438	0.924233	2.48369e-06				+	+	FB-P_Ctrl;P-BF_Ctrl	4	4	4	10.8	10.8	10.8	59.327	0	15.817	250010000	30	2.23605	0.00168421	0.564184	5.37008	3.84481	0	1.48841	14.1965	O75398
O75400	PRPF40A	Pre-mRNA-processing factor 40 homolog A	28.3045	28.2293	28.1089	28.251	28.2764	28.3526	28.6789	28.6332	28.6419	0.358	0.000438848					+	P-BF_Ctrl	16	16	16	17.7	17.7	17.7	108.8	0	69.732	3883100000	139	0.540668	0.170936	0.079134	1.22446	2.76109	0.000303743	0.437097	7.45079	O75400
O75410	TACC1	Transforming acidic coiled-coil-containing protein 1	27.9445	27.8089	27.7793	26.6703	26.3754	26.4203	26.1186	25.9295	25.3204	-0.699167	0.0533658				+	+	FB-P_Ctrl;P-BF_Ctrl	15	15	14	26.6	26.6	25.2	87.793	0	95.45	2923800000	148	3.68437	0	-1.35551	-12.9225	2.94851	0.00011415	-2.05469	-8.34742	O75410
O75449	KATNA1	Katanin p60 ATPase-containing subunit A1	27.129	27.0015	26.9627	27.4798	27.651	27.754	26.9629	26.753	26.7771	-0.797267	0.00155007				+		FB-P_Ctrl	11	11	11	25.5	25.5	25.5	55.964	0	32.698	2141800000	81	2.49489	0.00120472	0.597175	6.32377	1.13101	0.0167501	-0.200069	-2.40494	O75449;Q9BW62
O75475	PSIP1	PC4 and SFRS1-interacting protein	30.6825	30.6419	30.6105	29.8679	29.5768	29.7737	30.1359	29.9879	29.9917	0.299033	0.0387071				+	+	FB-P_Ctrl;P-BF_Ctrl	16	16	15	29.6	29.6	28.1	60.103	0	135.57	18520000000	375	3.29362	0.000197938	-0.905505	-10.261	3.47856	0	-0.606451	-11.4481	O75475
O75489	NDUFS3	NADH dehydrogenase [ubiquinone] iron-sulfur protein 3, mitochondrial	26.6438	26.6335	26.3534	25.5	25.5603	25.6058	26.1177	26.2707	26.0932	0.605167	0.00067393				+	+	FB-P_Ctrl;P-BF_Ctrl	8	8	8	35.6	35.6	35.6	30.241	0	30.572	1011300000	70	3.23118	0.000184261	-0.988194	-9.88713	1.59482	0.00474984	-0.383044	-3.47705	O75489
O75528	TADA3	Transcriptional adapter 3	25.1653	25.0787	25.0738	26.3889	26.0958	25.8695	26.0076	25.2344	25.3799	-0.577433	0.108955				+		FB-P_Ctrl	7	7	7	21.8	21.8	21.8	48.902	0	13.989	493670000	28	2.56464	0.00115566	1.01212	6.6037	0.844167	0.0425713	0.43469	1.81827	O75528
O75530	EED	Polycomb protein EED	25.6975	25.571	25.3966	Not detected	Not detected	24.7054	24.8012	25.1086	25.2005	0.331367	#DIV/0!					+	P-BF_Ctrl	6	6	6	16.1	16.1	16.1	50.197	0	8.626	610700000	23	0	0.929802	-0.849689	0	1.596	0.00468507	-0.518305	-3.48002	O75530
O75533	SF3B1	Splicing factor 3B subunit 1	32.0243	31.8465	31.7732	32.1619	32.2306	32.3126	32.3204	32.1961	32.1702	-0.00613333	0.927826				+	+	FB-P_Ctrl;P-BF_Ctrl	58	58	58	57.2	57.2	57.2	145.83	0	323.31	57141000000	1492	1.82681	0.00315367	0.353671	4.09612	1.77782	0.00397051	0.347563	3.95989	O75533
O75534	CSDE1	Cold shock domain-containing protein E1	32.2661	32.2233	32.2059	31.7961	31.7476	31.6963	30.553	30.3181	30.395	-1.32463	6.00704e-05				+	+	FB-P_Ctrl;P-BF_Ctrl	33	33	33	37.2	37.2	37.2	88.884	0	323.31	73515000000	978	3.85737	0	-0.485105	-14.3012	4.84168	0	-1.80976	-25.3416	O75534
O75554	WBP4	WW domain-binding protein 4	25.3592	24.9669	24.9287	26.8202	26.5337	27.0433	26.4636	26.2469	26.2937	-0.464333	0.0452458				+	+	FB-P_Ctrl;P-BF_Ctrl	5	5	5	27.1	27.1	27.1	42.506	0	17.247	545970000	30	2.9781	0.000455235	1.71413	8.49759	2.91762	0.000111888	1.24981	8.19324	O75554
O75582	RPS6KA5	Ribosomal protein S6 kinase alpha-5	24.0777	24.0414	23.9159	24.6995	24.3902	25.6136	24.5896	24.4952	24.4889	-0.376533	0.364888					+	P-BF_Ctrl	5	5	5	6.2	6.2	6.2	89.864	0	5.4208	191270000	20	1.12891	0.0216684	0.889437	2.40049	3.01984	0	0.512897	8.71358	O75582;O75676
O75607	NPM3	Nucleoplasmin-3	28.45	28.3474	28.3461	27.8606	27.755	27.5707	27.5152	Not detected	27.3754	-0.283467	0.101214				+	+	FB-P_Ctrl;P-BF_Ctrl	2	2	2	17.4	17.4	17.4	19.343	0	318.13	3829600000	62	2.69001	0.000859585	-0.652415	-7.1339	3.07238	0	-0.935882	-13.6725	O75607
O75643	SNRNP200	U5 small nuclear ribonucleoprotein 200 kDa helicase	30.8418	30.7807	30.7284	30.9525	30.7974	30.8104	31.2539	31.0654	31.161	0.306667	0.0141212					+	P-BF_Ctrl	78	78	78	43.2	43.2	43.2	244.5	0	323.31	26827000000	988	0.514298	0.192274	0.0697746	1.1727	2.39139	0.00092599	0.376478	5.92689	O75643
O75663	TIPRL	TIP41-like protein	32.7087	32.5837	32.5679	32.4036	32.7968	32.9339	31.8617	32.0957	32.2291	-0.649267	0.0276532					+	P-BF_Ctrl	18	18	18	70.2	70.2	70.2	31.444	0	323.31	95175000000	850	0.215151	0.726385	0.0913671	0.553622	2.06289	0.00232287	-0.557928	-4.79943	O75663
O75665	OFD1	Oral-facial-digital syndrome 1 protein	26.1917	26.0089	25.9429	26.0265	25.544	25.6752	25.2451	Not detected	24.9767	-0.637667	0.0567574					+	P-BF_Ctrl	11	11	11	13.2	13.2	13.2	116.67	0	38.915	870720000	49	0.857976	0.0505612	-0.299252	-1.84567	2.17896	0.00176388	-0.936945	-6.75669	O75665
O75694	NUP155	Nuclear pore complex protein Nup155	27.0966	27.0657	27.0563	26.34	25.9417	26.7538	26.7074	26.571	27.1484	0.463767	0.187554				+		FB-P_Ctrl	18	18	18	18	18	18	155.2	0	48.777	2046900000	89	1.44091	0.00953229	-0.727725	-3.0997	0.687568	0.0747772	-0.263927	-1.51097	O75694
O75717	WDHD1	WD repeat and HMG-box DNA-binding protein 1	28.0812	27.9099	27.7106	29.1584	28.7787	29.3161	29.0687	28.552	28.6252	-0.335767	0.213058				+	+	FB-P_Ctrl;P-BF_Ctrl	23	23	23	28.3	28.3	28.3	125.97	0	250.61	3485600000	168	2.45341	0.00157098	1.18382	6.1621	1.92472	0.00292406	0.848091	4.37807	O75717
O75794	CDC123	Cell division cycle protein 123 homolog	26.7356	26.5377	26.5274	Not detected	25.9303	25.9139	25.6362	25.7133	25.6927	-0.241367	0.00415682				+	+	FB-P_Ctrl;P-BF_Ctrl	8	8	8	26.5	26.5	26.5	39.134	0	17.006	1190900000	41	2.34765	0.00146615	-0.678131	-7.73625	3.67505	0	-0.919516	-12.8519	O75794
O75818	RPP40	Ribonuclease P protein subunit p40	27.445	26.9705	26.4663	24.3634	26.5072	27.0513	25.4619	24.9769	25.182	-0.767033	0.408957					+	P-BF_Ctrl	6	6	6	24.8	24.8	24.8	41.833	0	25.716	1036100000	31	0.496158	0.208171	-0.986623	-1.13698	2.28952	0.00138889	-1.75365	-5.55673	O75818
O75821	EIF3G	Eukaryotic translation initiation factor 3 subunit G	29.8378	29.7537	29.6315	29.2252	29.3225	29.4463	28.7874	28.4985	28.7106	-0.665833	0.00345493				+	+	FB-P_Ctrl;P-BF_Ctrl	12	12	12	33.8	33.8	33.8	35.611	0	232.68	12437000000	195	2.02313	0.00260163	-0.409673	-4.67524	3.28865	0	-1.0755	-10.2308	O75821
O75822	EIF3J	Eukaryotic translation initiation factor 3 subunit J	28.0387	27.6349	27.6057	26.6599	26.4271	26.8913	26.2759	25.2418	26.8393	-0.540433	0.328987				+	+	FB-P_Ctrl;P-BF_Ctrl	9	9	9	33.7	33.7	33.7	29.062	0	30.45	2340400000	75	2.325	0.0014535	-1.10032	-5.68342	1.54846	0.00539248	-1.64077	-3.36079	O75822
O75874	IDH1	Isocitrate dehydrogenase [NADP] cytoplasmic	27.2083	27.0568	26.9163	26.8411	27.0021	26.8109	26.3362	26.4696	26.5332	-0.438367	0.00616714					+	P-BF_Ctrl	9	9	8	29	29	26.8	46.659	0	35.452	1805100000	55	0.786668	0.0653469	-0.175789	-1.70482	2.41042	0.000939738	-0.61416	-5.99826	O75874
O75909	CCNK	Cyclin-K	28.7555	28.5237	28.3407	28.9894	29.3146	29.34	29.5999	29.7356	29.4521	0.3812	0.0522319				+	+	FB-P_Ctrl;P-BF_Ctrl	9	9	9	24.5	24.5	24.5	64.239	0	153.32	5528800000	173	1.82654	0.00315134	0.674725	4.09537	2.72042	0.000297382	1.05587	7.26799	O75909
O75934	BCAS2	Pre-mRNA-splicing factor SPF27	28.2243	28.0865	27.9782	27.8451	27.4178	27.634	27.7832	27.8232	27.7446	0.151367	0.29398				+	+	FB-P_Ctrl;P-BF_Ctrl	9	9	9	41.8	41.8	41.8	26.131	0	82.852	3000500000	141	1.50659	0.00847607	-0.464052	-3.25777	1.85738	0.00347165	-0.312695	-4.18275	O75934
O75937	DNAJC8	DnaJ homolog subfamily C member 8	30.0926	30.0276	29.8704	30.5314	30.6192	30.5957	30.4241	30.6721	30.421	-0.0763667	0.43074				+	+	FB-P_Ctrl;P-BF_Ctrl	11	11	11	53.4	53.4	53.4	29.841	0	285.96	13528000000	175	2.92784	0.000437956	0.585254	8.244	2.06102	0.0023194	0.508888	4.79352	O75937
O75947	ATP5H	ATP synthase subunit d, mitochondrial	27.4828	27.4034	27.3398	Not detected	25.873	27.8685	26.3049	26.5865	26.2255	-0.49845	0.557269					+	P-BF_Ctrl	6	6	6	50.9	50.9	50.9	18.491	0	16.454	1817500000	61	0.281685	0.575234	-0.537922	-0.721452	3.04618	0	-1.03634	-8.85247	O75947
O75962	TRIO	Triple functional domain protein	22.6429	22.5751	#NUM!	Not detected	22.9257	22.8552	Not detected	Not detected	Not detected	#DIV/0!	#DIV/0!				+		FB-P_Ctrl	3	3	3	2.4	2.4	2.4	346.9	0.0011198	3.0925	73162000	9	1.5396	0.00764328	0.281466	5.75749	Not detected	1	0	Not detected	O75962
O75964	ATP5L	ATP synthase subunit g, mitochondrial	28.3136	28.3103	28.1452	25.5681	26.7186	26.5154	26.4102	26.7045	26.2632	0.191933	0.637919				+	+	FB-P_Ctrl;P-BF_Ctrl	4	4	4	46.6	46.6	46.6	11.428	0	42.404	2855900000	63	2.2856	0.00153991	-1.989	-5.54287	3.65898	0	-1.79708	-12.7312	O75964
O76003	GLRX3	Glutaredoxin-3	27.6445	27.5936	27.4997	26.5677	26.3937	26.4648	25.9235	26.0848	26.1501	-0.4226	0.00738394				+	+	FB-P_Ctrl;P-BF_Ctrl	8	8	8	24.8	24.8	24.8	37.432	0	14.09	2106300000	58	4.12679	0	-1.10386	-16.7367	4.36062	0	-1.52645	-19.175	O76003
O76021	RSL1D1	Ribosomal L1 domain-containing protein 1	29.8501	29.8354	29.6374	27.3942	28.0423	28.068	28.3846	28.7164	28.513	0.703167	0.0431731				+	+	FB-P_Ctrl;P-BF_Ctrl	19	19	19	41.4	41.4	41.4	54.972	0	123.3	9882600000	237	2.95909	0.000447761	-1.93947	-8.40084	3.32225	0	-1.2363	-10.4369	O76021
O76041	NEBL	Nebulette	25.9597	25.8502	25.2478	24.5233	24.3062	Not detected	Not detected	Not detected	Not detected	#DIV/0!	#DIV/0!				+		FB-P_Ctrl	2	2	2	3.7	3.7	3.7	116.45	0	56.155	340710000	18	1.63042	0.00570102	-1.27117	-4.28065	0	1	Not detected	0	O76041
O76064	RNF8	E3 ubiquitin-protein ligase RNF8	25.9086	25.7851	25.6969	27.1146	27.2733	26.4009	26.6523	27.1572	26.9366	-0.0142333	0.965074				+	+	FB-P_Ctrl;P-BF_Ctrl	8	8	8	21.9	21.9	21.9	55.517	0	17.867	842480000	41	1.83367	0.00308996	1.13268	4.11546	2.67195	0.000507042	1.11847	7.05531	O76064
O76094	SRP72	Signal recognition particle subunit SRP72	28.498	28.324	28.2895	27.2161	27.4165	27.3078	27.5951	27.6054	27.3487	0.202933	0.117388				+	+	FB-P_Ctrl;P-BF_Ctrl	12	12	12	26.1	26.1	26.1	74.605	0	148.36	4116900000	153	3.58513	0	-1.05699	-12.1902	2.89226	0.000110345	-0.854108	-8.06862	O76094
O94763	URI1	Unconventional prefoldin RPB5 interactor 1	26.4195	26.3867	26.324	26.1935	25.9193	25.8365	26.1192	26.3446	Not detected	0.2488	0.223573				+		FB-P_Ctrl	9	9	9	27.1	27.1	27.1	59.832	0	25.568	1168400000	44	1.61631	0.00586034	-0.393622	-3.53173	0.675033	0.0788947	-0.144854	-1.58413	O94763
O94776	MTA2	Metastasis-associated protein MTA2	28.9699	28.8708	28.8378	29.5229	29.4757	29.5607	29.8942	29.5282	29.6219	0.161667	0.224031				+	+	FB-P_Ctrl;P-BF_Ctrl	21	18	17	36.7	32	31	75.022	0	175.95	7980400000	184	3.75046	0	0.626933	13.4333	2.60144	0.000660903	0.788586	6.75568	O94776
O94788	ALDH1A2	Retinal dehydrogenase 2	30.9061	30.7734	30.6285	29.8974	29.8978	29.9532	29.5495	29.5302	29.5922	-0.358833	0.000161159				+	+	FB-P_Ctrl;P-BF_Ctrl	22	22	21	50	50	48.5	56.723	0	323.31	21576000000	532	3.31178	0.000200837	-0.853219	-10.3722	3.90952	0	-1.21205	-14.7441	O94788;P47895;P05091;P00352
O94842	TOX4	TOX high mobility group box family member 4	30.9146	30.7773	30.7769	32.1262	31.9882	32.0044	32.3088	32.3279	32.2542	0.257367	0.00620951				+	+	FB-P_Ctrl;P-BF_Ctrl	16	16	16	36.2	36.2	36.2	66.194	0	323.31	34055000000	623	4.36724	0	1.21667	19.2488	5.07382	0	1.47402	28.9823	O94842;O15405;O94900;Q96NM4
O94874	UFL1	E3 UFM1-protein ligase 1	25.9471	25.9188	25.8941	25.4798	Not detected	25.5402	Not detected	25.3087	25.1926	-0.25935	0.0581606				+	+	FB-P_Ctrl;P-BF_Ctrl	10	10	10	14.2	14.2	14.2	89.594	0	33.771	841070000	37	3.07294	0.000156863	-0.410013	-13.6785	3.10991	0	-0.669374	-14.0772	O94874
O94903	PROSC	Proline synthase co-transcribed bacterial homolog protein	26.4288	26.4041	26.3	25.008	25.0445	Not detected	24.85	Not detected	Not detected	-0.17625	#DIV/0!				+		FB-P_Ctrl	5	5	5	20.7	20.7	20.7	30.344	0	8.9783	833820000	17	3.88412	0	-1.3514	-25.6097	0	1	-1.52758	0	O94903
O94905	ERLIN2	Erlin-2	27.9208	27.7246	27.6463	26.9143	26.3207	26.4367	26.4199	26.6975	26.539	-0.0051	0.980747				+	+	FB-P_Ctrl;P-BF_Ctrl	11	11	8	41.3	41.3	32.2	37.839	0	33.489	2780700000	80	2.42643	0.00154222	-1.20665	-6.05885	3.34464	0	-1.21176	-10.5764	O94905
O94906	PRPF6	Pre-mRNA-processing factor 6	28.0828	28.0627	27.8997	28.6245	27.7998	27.9638	27.8047	27.7494	27.7733	-0.353567	0.234121					+	P-BF_Ctrl	22	22	22	24	24	24	106.92	0	78.504	3396600000	105	0.16661	0.823212	0.114301	0.441931	1.78397	0.00391672	-0.239275	-3.97682	O94906
O94913	PCF11	Pre-mRNA cleavage complex 2 protein Pcf11	27.9528	27.8107	27.6475	28.0498	27.817	27.9623	28.3431	27.9971	28.2488	0.2533	0.109743					+	P-BF_Ctrl	22	22	22	18.3	18.3	18.3	173.05	0	64.806	2865600000	88	0.554821	0.161707	0.139382	1.25217	1.35143	0.00932792	0.392694	2.89093	O94913
O94927	HAUS5	HAUS augmin-like complex subunit 5	28.1497	28.1223	28.0611	27.9189	27.9586	27.9511	27.2948	27.445	27.6251	-0.4879	0.00713573				+	+	FB-P_Ctrl;P-BF_Ctrl	17	17	17	32.7	32.7	32.7	71.682	0	120.95	3675800000	95	2.36226	0.00147902	-0.168159	-5.81903	2.57045	0.000653371	-0.656066	-6.62752	O94927
O94992	HEXIM1	Protein HEXIM1	26.9303	26.5935	26.5805	28.1558	27.8035	27.8373	28.0757	27.5383	27.7341	-0.1495	0.481823				+	+	FB-P_Ctrl;P-BF_Ctrl	6	6	6	20.6	20.6	20.6	40.623	0	166.37	1612500000	77	2.81011	0.000662252	1.23079	7.67654	2.29151	0.0013923	1.0813	5.56378	O94992;Q96MH2
O95104	SCAF4	Splicing factor, arginine/serine-rich 15	28.3915	28.0437	28.0023	28.6472	28.7575	28.8586	28.9748	28.9159	29.0854	0.2376	0.0392113				+	+	FB-P_Ctrl;P-BF_Ctrl	10	10	7	14.6	14.6	12.3	125.87	0	192.95	4392000000	192	1.93889	0.00282023	0.608576	4.42001	2.50407	0.000802198	0.84614	6.36002	O95104
O95163	IKBKAP	Elongator complex protein 1	26.4887	26.4415	26.3819	26.6988	26.712	26.5523	25.6999	25.7488	26.0397	-0.8249	0.00218644				+	+	FB-P_Ctrl;P-BF_Ctrl	15	15	15	16.1	16.1	16.1	150.25	0	50.002	1339800000	77	1.65446	0.00536747	0.217014	3.63007	2.27413	0.00137652	-0.607894	-5.50248	O95163
O95218	ZRANB2	Zinc finger Ran-binding domain-containing protein 2	28.8634	28.5697	28.4735	28.102	28.3002	28.2161	28.1673	26.9844	27.6687	-0.5993	0.159827				+	+	FB-P_Ctrl;P-BF_Ctrl	9	9	9	26.7	26.7	26.7	37.404	0	32.354	3662700000	60	1.51934	0.00827397	-0.429404	-3.28895	1.32856	0.00957143	-1.02873	-2.83871	O95218
O95219	SNX4	Sorting nexin-4	25.8916	25.7678	25.643	25.8627	25.7886	25.9339	24.7789	24.7662	24.822	-1.0727	1.8723e-05					+	P-BF_Ctrl	7	7	7	20.2	20.2	20.2	51.908	0	18.644	755410000	35	0.494659	0.209698	0.0942669	1.13402	3.72974	0	-0.978446	-13.2711	O95219
O95232	LUC7L3	Luc7-like protein 3	29.4714	29.3929	29.2843	28.5976	28.4974	28.6692	29.3651	29.072	29.1969	0.623267	0.00318716				+		FB-P_Ctrl	10	10	10	26.4	26.4	26.4	51.466	0	283.05	8581700000	187	3.37827	0.000223256	-0.794772	-10.7892	0.785439	0.0527514	-0.17154	-1.7024	O95232
O95239	KIF4A	Chromosome-associated kinesin KIF4A	28.9893	28.894	28.6973	30.1267	29.9417	29.897	29.9892	29.9241	29.812	-0.0800333	0.411149				+	+	FB-P_Ctrl;P-BF_Ctrl	37	37	36	35	35	34.1	139.88	0	323.31	7560800000	251	3.27671	0.000192	1.12822	10.1585	3.32391	0	1.04819	10.4471	O95239;Q2VIQ3;Q6ZMV9
O95292	VAPB	Vesicle-associated membrane protein-associated protein B/C	29.2143	28.9818	28.8509	27.7624	27.3154	27.5834	27.8082	27.529	27.7182	0.1314	0.440929				+	+	FB-P_Ctrl;P-BF_Ctrl	7	6	6	28	28	28	27.228	0	34.388	5792400000	101	3.01933	0.000470219	-1.46196	-8.71093	3.23336	0	-1.33054	-9.89993	O95292
O95299	NDUFA10	NADH dehydrogenase [ubiquinone] 1 alpha subcomplex subunit 10, mitochondrial	27.0812	26.9808	26.9037	Not detected	25.4984	25.4229	25.5768	26.0871	24.7486	0.0101833	0.985157				+	+	FB-P_Ctrl;P-BF_Ctrl	7	7	7	21.4	21.4	21.4	40.75	0	21.353	1559700000	39	3.63916	0	-1.52792	-21.2025	1.74057	0.00411353	-1.51776	-3.85833	O95299
O95319	CELF2	CUGBP Elav-like family member 2	27.6686	27.1714	27.0909	25.6057	Not detected	Not detected	25.7634	26.2837	26.6436	0.624533	#DIV/0!					+	P-BF_Ctrl	4	4	4	11	11	11	54.284	0	57.127	1518400000	44	0	0.921431	-1.70465	0	1.58484	0.00486946	-1.08005	-3.45182	O95319
O95347	SMC2	Structural maintenance of chromosomes protein 2	28.8685	28.8514	28.8201	28.3278	28.1229	28.0466	28.4006	27.6546	27.8027	-0.213133	0.429943				+	+	FB-P_Ctrl;P-BF_Ctrl	32	32	32	29.7	29.7	29.7	135.65	0	72.154	6271700000	187	2.87722	0.00054902	-0.6809	-7.9955	1.76088	0.00414637	-0.894047	-3.91348	O95347
O95372	LYPLA2	Acyl-protein thioesterase 2	31.2807	30.9699	30.8835	26.3152	30.6577	30.3733	27.321	27.7655	28.2374	-1.34077	0.400708					+	P-BF_Ctrl	3	3	3	18.2	18.2	18.2	24.737	0	233.91	20631000000	121	0.615491	0.12677	-1.92932	-1.37057	3.44858	0	-3.27009	-11.2473	O95372
O95373	IPO7	Importin-7	27.9661	27.9341	27.8962	26.8486	26.9708	27.0053	27.1946	27.2255	27.1377	0.244367	0.0106471				+	+	FB-P_Ctrl;P-BF_Ctrl	14	14	14	17.6	17.6	17.6	119.52	0	56.43	3485400000	161	4.36132	0	-0.990551	-19.1828	4.66014	0	-0.746181	-22.8133	O95373
O95391	SLU7	Pre-mRNA-splicing factor SLU7	28.3333	28.1289	28.1014	30.0606	29.9008	30.1422	30.0505	29.3335	29.6883	-0.343767	0.191225				+	+	FB-P_Ctrl;P-BF_Ctrl	18	18	18	40.8	40.8	40.8	68.386	0	246.12	5060700000	151	4.26381	0	1.84666	18.126	2.62294	0.000670565	1.50288	6.84583	O95391
O95400	CD2BP2	CD2 antigen cytoplasmic tail-binding protein 2	26.6411	26.5792	26.5586	27.2764	27.2374	27.3267	27.6424	27.6634	27.4811	0.315467	0.00750222				+	+	FB-P_Ctrl;P-BF_Ctrl	6	6	6	24.3	24.3	24.3	37.646	0	37.227	1375600000	57	4.36179	0	0.687213	19.1879	4.04842	0	1.00266	15.9894	O95400
O95425	SVIL	Supervillin	27.0401	27.0205	26.908	27.1677	27.0339	27.421	26.0963	26.0707	26.3015	-1.05137	0.00146523					+	P-BF_Ctrl	19	19	19	12.5	12.5	12.5	247.74	0	72.205	1860600000	85	0.837697	0.0543495	0.217984	1.80546	3.24038	0	-0.833413	-9.94138	O95425
O95433	AHSA1	Activator of 90 kDa heat shock protein ATPase homolog 1	29.9123	29.6492	29.6303	29.369	29.4032	29.4209	28.6515	28.8791	28.9503	-0.570733	0.00335079				+	+	FB-P_Ctrl;P-BF_Ctrl	11	11	11	37	37	37	38.274	0	117	11770000000	251	1.64542	0.00547484	-0.332842	-3.60661	2.67187	0.000506533	-0.903571	-7.05496	O95433
O95453	PARN	Poly(A)-specific ribonuclease PARN	26.1188	26.0945	25.8266	25.6266	25.7575	25.7016	25.9766	25.6807	25.7194	0.097	0.388271				+		FB-P_Ctrl	8	8	8	14.9	14.9	14.9	73.45	0	12.303	860320000	25	1.4615	0.0091378	-0.318031	-3.1488	0.772296	0.0546014	-0.22106	-1.67659	O95453
O95456	PSMG1	Proteasome assembly chaperone 1	27.0103	26.7745	26.4912	25.4996	26.0764	26.0056	25.9693	26.0408	26.2712	0.233233	0.314991				+	+	FB-P_Ctrl;P-BF_Ctrl	6	6	6	24.3	24.3	24.3	32.854	0	29.157	1112100000	51	1.72344	0.00465574	-0.898131	-3.81222	1.71419	0.0040812	-0.664904	-3.78744	O95456
O95470	SGPL1	Sphingosine-1-phosphate lyase 1	27.9646	27.4815	27.2728	25.9608	26.1572	26.7075	25.9569	26.0581	26.4177	-0.130933	0.645467				+	+	FB-P_Ctrl;P-BF_Ctrl	8	8	8	19.4	19.4	19.4	63.523	0	12.937	1817100000	33	1.89135	0.00292765	-1.29781	-4.28051	2.34628	0.00100503	-1.42875	-5.76056	O95470
O95478	NSA2	Ribosome biogenesis protein NSA2 homolog	27.7829	27.7563	27.7236	27.2086	26.3644	26.5174	27.5737	27.5582	27.4126	0.818033	0.0365614				+	+	FB-P_Ctrl;P-BF_Ctrl	6	6	6	25	25	25	30.065	0	15.862	2904800000	72	1.81501	0.00335351	-1.05747	-4.06302	1.94068	0.00295129	-0.239463	-4.4253	O95478
O95486	SEC24A	Protein transport protein Sec24A	26.3734	26.3658	26.3409	25.8192	25.9066	25.8587	25.0176	25.0857	24.8587	-0.874167	0.000261842				+	+	FB-P_Ctrl;P-BF_Ctrl	12	12	12	15.2	15.2	15.2	119.75	0	86.083	976470000	65	4.28927	0	-0.498526	-18.3962	4.44986	0	-1.37269	-20.1947	O95486
O95551	TDP2	Tyrosyl-DNA phosphodiesterase 2	24.4106	24.1957	24.1382	28.6221	28.6772	28.3011	27.1352	27.2129	26.9809	-1.4238	0.00046575				+	+	FB-P_Ctrl;P-BF_Ctrl	7	7	7	17.7	17.7	17.7	40.929	0	44.222	961750000	32	5.12427	0	4.28529	29.8396	4.92928	0	2.86149	26.6588	O95551
O95573	ACSL3	Long-chain-fatty-acid--CoA ligase 3	26.5508	26.4178	26.3996	25.0761	Not detected	Not detected	Not detected	25.4141	25.6034	0.43265	#DIV/0!					+	P-BF_Ctrl	9	9	8	17.4	17.4	14.9	80.419	0	38.356	1127400000	64	0	0.922077	-1.38001	0	2.68715	0.000515337	-0.947345	-10.1201	O95573
O95619	YEATS4	YEATS domain-containing protein 4	26.3128	26.0986	26.0726	27.2712	27.327	27.0776	27.0915	26.7995	26.9909	-0.264633	0.0814073				+	+	FB-P_Ctrl;P-BF_Ctrl	8	8	8	41.9	41.9	41.9	26.499	0	13.912	1077100000	40	3.23655	0.000185328	1.06389	9.91875	2.65336	0.000683217	0.79929	6.97522	O95619
O95639	CPSF4	Cleavage and polyadenylation specificity factor subunit 4	25.8953	25.7042	25.6758	26.5705	26.3352	26.4387	27.2133	26.492	26.6172	0.326033	0.233809				+	+	FB-P_Ctrl;P-BF_Ctrl	6	6	6	37.9	37.9	37.9	30.255	0	18.87	566970000	36	2.68659	0.000972053	0.689674	7.11897	1.91867	0.00291372	1.0157	4.36027	O95639
O95677	EYA4	Eyes absent homolog 4	25.3743	25.3438	25.2746	26	26.283	26.4135	25.9627	25.94	26.0308	-0.254333	0.111733				+	+	FB-P_Ctrl;P-BF_Ctrl	7	7	7	16.1	16.1	16.1	69.504	0	14.372	570000000	33	2.70014	0.000864865	0.901307	7.17834	4.05951	0	0.646943	16.0931	O95677
O95684	FGFR1OP	FGFR1 oncogene partner	27.2159	27.1842	27.1369	26.8684	26.6576	26.519	25.811	25.632	25.7687	-0.944433	0.00119999				+	+	FB-P_Ctrl;P-BF_Ctrl	9	9	9	31.1	31.1	31.1	43.064	0	72.655	1995400000	64	2.05522	0.00231927	-0.497328	-4.77525	4.78812	0	-1.44181	-24.5682	O95684
O95707	POP4	Ribonuclease P protein subunit p29	26.3143	26.2047	26.1621	25.1733	25.4246	25.7869	26.1129	26.4367	25.7158	0.626867	0.0841971				+		FB-P_Ctrl	4	4	4	20.5	20.5	20.5	25.424	0	15.918	951480000	33	1.85106	0.00312481	-0.765453	-4.16475	0.258574	0.631194	-0.138605	-0.649634	O95707
O95721	SNAP29	Synaptosomal-associated protein 29	30.2751	30.2107	30.1857	29.3984	29.6979	29.6848	28.8389	28.8149	28.8651	-0.754067	0.00158226				+	+	FB-P_Ctrl;P-BF_Ctrl	11	11	11	54.3	54.3	54.3	28.97	0	167.37	16531000000	288	2.46852	0.00158743	-0.630107	-6.22058	5.8606	0	-1.3842	-45.6396	O95721
O95747	OXSR1	Serine/threonine-protein kinase OSR1	25.7303	25.4365	25.1679	24.1668	24.4594	24.2116	24.8893	24.8221	24.6024	0.492	0.0173052				+	+	FB-P_Ctrl;P-BF_Ctrl	3	3	2	5.5	5.5	4.2	58.022	0	5.4532	506840000	21	2.47893	0.00149474	-1.16566	-6.26112	1.66577	0.00435567	-0.673659	-3.65955	O95747
O95757	HSPA4L	Heat shock 70 kDa protein 4L	25.8971	25.8059	25.7912	25.5535	25.7517	25.8681	25.585	Not detected	25.5537	-0.155083	0.283929					+	P-BF_Ctrl	10	8	8	14.4	11.7	11.7	94.511	0	20.573	731450000	39	0.475187	0.227035	-0.106949	-1.09552	2.01449	0.00264908	-0.26204	-5.91075	O95757
O95777	LSM8	U6 snRNA-associated Sm-like protein LSm8	26.6757	26.3645	26.3477	27.748	28.1389	27.9302	28.0065	28.0005	27.8808	0.0235667	0.854024				+	+	FB-P_Ctrl;P-BF_Ctrl	7	7	7	99	99	99	10.403	0	38.606	1326500000	80	3.16507	0.000172352	1.47638	9.50517	3.71152	0	1.4999	13.1301	O95777
O95782	AP2A1	AP-2 complex subunit alpha-1	27.3	27.2821	27.2229	26.3719	26.1789	26.3698	26.6497	26.5714	26.4833	0.261267	0.0309424				+	+	FB-P_Ctrl;P-BF_Ctrl	15	15	11	21.2	21.2	16.1	107.54	0	67.749	2090200000	108	3.83559	0	-0.961464	-14.1201	3.7095	0	-0.700169	-13.1144	O95782
O95785	WIZ	Protein Wiz	27.4878	27.3326	27.2565	26.9393	26.5207	26.1312	26.45	26.8913	27.4749	0.408333	0.3403				+		FB-P_Ctrl	11	11	11	10.1	10.1	10.1	178.67	0	33.855	1764900000	37	1.56778	0.00695156	-0.828539	-3.40896	0.620282	0.1034	-0.420195	-1.37991	O95785
O95793	STAU1	Double-stranded RNA-binding protein Staufen homolog 1	29.0852	28.8909	28.7898	27.4433	27.4768	27.2218	27.8611	28.191	27.9835	0.631233	0.0072697				+	+	FB-P_Ctrl;P-BF_Ctrl	15	15	14	35.7	35.7	34.5	63.182	0	86.219	5731800000	189	3.7035	0	-1.54136	-13.0684	2.66494	0.000596	-0.910119	-7.02502	O95793
O95801	TTC4	Tetratricopeptide repeat protein 4	25.0926	25.0913	25.0179	Not detected	Not detected	Not detected	24.0961	24.3517	24.3643	#DIV/0!	#DIV/0!					+	P-BF_Ctrl	6	6	6	16	16	16	44.678	0	7.5606	382320000	20	0	0.922729	Not detected	0	3.03141	0	-0.796602	-8.77433	O95801
O95817	BAG3	BAG family molecular chaperone regulator 3	27.9912	27.9901	27.9775	28.3206	28.5919	28.4913	27.7005	27.5861	27.8353	-0.760633	0.00207162				+	+	FB-P_Ctrl;P-BF_Ctrl	15	15	15	41.2	41.2	41.2	61.594	0	53.169	3875500000	115	2.43062	0.00154536	0.481642	6.07478	1.74391	0.00412169	-0.278961	-3.86735	O95817
O95819	MAP4K4	Mitogen-activated protein kinase kinase kinase kinase 4	27.3853	27.2953	27.2434	27.0936	26.5501	26.9509	26.4982	Not detected	26.5577	-0.336917	0.208913					+	P-BF_Ctrl	15	15	10	16.3	16.3	12.3	142.1	0	61.684	2378100000	90	1.23948	0.0153843	-0.443089	-2.63947	3.05264	0	-0.779994	-13.4643	O95819;Q8N4C8
O95861	BPNT1	3(2),5-bisphosphate nucleotidase 1	28.6407	28.5755	28.3168	27.0032	27.1627	27.0088	26.7847	27.003	26.3943	-0.3309	0.149107				+	+	FB-P_Ctrl;P-BF_Ctrl	6	6	6	24.4	24.4	24.4	33.392	0	95.153	3024000000	96	3.69295	0	-1.45278	-12.9877	3.02818	0	-1.78369	-8.75735	O95861
O95905	ECD	Protein SGT1	29.6403	29.6311	29.5535	28.5867	28.6143	28.8013	27.6903	26.3285	27.4638	-1.50657	0.0242048				+	+	FB-P_Ctrl;P-BF_Ctrl	18	18	18	36.2	36.2	36.2	72.757	0	223.66	9959600000	293	3.68396	0	-0.940875	-12.9193	2.3563	0.00101095	-2.44747	-5.79716	O95905
O95983	MBD3	Methyl-CpG-binding domain protein 3	27.2108	27.0249	27.0236	28.0968	28.1491	28.2622	27.9607	28.2089	28.0388	-0.0999	0.319886				+	+	FB-P_Ctrl;P-BF_Ctrl	7	7	7	27.8	27.8	27.8	32.844	0	53.271	2562900000	106	3.78387	0	1.08298	13.6989	3.28851	0	0.983109	10.2299	O95983
O95985	TOP3B	DNA topoisomerase 3-beta-1	27.8644	27.844	27.6908	26.5415	26.4903	26.6732	26.8346	26.7853	26.3667	0.0938667	0.584682				+	+	FB-P_Ctrl;P-BF_Ctrl	15	15	14	21.1	21.1	19.8	96.661	0	43.994	2742500000	123	4.04293	0	-1.23142	-15.9383	2.70257	0.000293996	-1.13753	-7.189	O95985
O96007	MOCS2	Molybdopterin synthase catalytic subunit	27.3935	27.2867	27.2224	26.706	27.4236	26.9536	25.8922	25.7828	26.0469	-1.12043	0.00747487					+	P-BF_Ctrl	6	6	6	39.4	39.4	39.4	20.944	0	32.223	2000300000	85	0.560401	0.157866	-0.273184	-1.26308	3.96637	0	-1.39361	-15.242	O96007
O96008	TOMM40	Mitochondrial import receptor subunit TOM40 homolog	29.4437	29.1817	29.0806	27.6415	27.535	27.5444	27.314	27.1939	27.2936	-0.306467	0.00368442				+	+	FB-P_Ctrl;P-BF_Ctrl	7	7	7	32.7	32.7	32.7	37.893	0	83.641	6273200000	149	3.89849	0	-1.66168	-14.6493	4.17418	0	-1.96819	-17.205	O96008
O96013	PAK4	Serine/threonine-protein kinase PAK 4	28.5418	28.4063	28.3864	27.9689	27.9295	27.9596	27.5316	27.537	27.5128	-0.425533	6.92052e-06				+	+	FB-P_Ctrl;P-BF_Ctrl	13	13	13	32	32	32	64.071	0	47.149	4882700000	151	3.21506	0.000182163	-0.492182	-9.79271	4.30663	0	-0.917687	-18.5828	O96013;Q9NQU5;Q9P286
O96019	ACTL6A	Actin-like protein 6A	26.9906	26.8596	26.648	27.4278	27.5353	27.3932	28.2119	27.7071	28.2107	0.591133	0.0270635				+	+	FB-P_Ctrl;P-BF_Ctrl	8	8	8	29.4	29.4	29.4	47.46	0	30.644	1535900000	50	2.33049	0.00145629	0.619381	5.70326	2.46123	0.000786355	1.21049	6.1923	O96019
O96028	WHSC1	Histone-lysine N-methyltransferase NSD2	27.1628	27.137	27.1017	26.5754	26.6209	26.7273	27.1187	27.0896	27.0563	0.447	0.000769186				+		FB-P_Ctrl	11	11	11	11.4	11.4	11.4	152.26	0	41.403	1832600000	85	3.28145	0.000193548	-0.492643	-10.1871	0.837451	0.0434327	-0.0456161	-1.80497	O96028
P00338	LDHA	L-lactate dehydrogenase A chain	28.7017	28.521	28.4671	27.0587	27.2893	26.91	27.2616	27.7688	27.1682	0.313533	0.221618				+	+	FB-P_Ctrl;P-BF_Ctrl	11	11	11	38.3	38.3	38.3	36.688	0	70.112	4697300000	95	3.45057	0.000238213	-1.47728	-11.2604	2.36518	0.00101523	-1.16377	-5.82977	P00338
P00367	GLUD1	Glutamate dehydrogenase 1, mitochondrial;Glutamate dehydrogenase 2, mitochondrial	28.8017	28.6956	28.5965	28.3549	27.9381	28.2853	28.8345	28.5638	28.5642	0.4614	0.0426859				+		FB-P_Ctrl	15	15	15	30.6	30.6	30.6	61.397	0	65.749	5190800000	206	1.62761	0.00575989	-0.505166	-3.56069	0.151299	0.861869	-0.0437558	-0.405546	P00367;P49448
P00374	DHFR	Dihydrofolate reductase	27.5413	27.5085	27.1769	26.5461	26.6209	26.6006	26.5465	25.4961	25.7809	-0.648033	0.108331				+	+	FB-P_Ctrl;P-BF_Ctrl	5	5	5	36.4	36.4	36.4	21.452	0	22.129	1518600000	62	2.63999	0.00121269	-0.819704	-6.9181	1.92788	0.00293656	-1.4677	-4.38741	P00374
P00387	CYB5R3	NADH-cytochrome b5 reductase 3;NADH-cytochrome b5 reductase 3 membrane-bound form;NADH-cytochrome b5 reductase 3 soluble form	28.0334	27.6336	27.6206	26.9322	26.7925	27.0262	26.8436	26.9459	26.7538	-0.0692	0.474154				+	+	FB-P_Ctrl;P-BF_Ctrl	9	9	9	44.5	44.5	44.5	34.234	0	31.206	2580600000	95	2.29582	0.00154863	-0.845542	-5.57904	2.47537	0.000793478	-0.914766	-6.24723	P00387
P00491	PNP	Purine nucleoside phosphorylase	28.8491	28.7136	28.4926	27.0061	28.043	27.8196	27.351	27.24	27.3136	-0.321367	0.367694				+	+	FB-P_Ctrl;P-BF_Ctrl	15	15	15	66.4	66.4	66.4	32.118	0	151.45	5048000000	177	1.48353	0.00881481	-1.0622	-3.20179	3.65512	0	-1.38357	-12.7023	P00491
P00966	ASS1	Argininosuccinate synthase	27.4225	27.4002	27.2989	26.4073	25.7691	25.8501	25.4908	25.6822	25.9001	-0.3178	0.244044				+	+	FB-P_Ctrl;P-BF_Ctrl	10	10	10	27.2	27.2	27.2	46.53	0	35.655	2073700000	65	2.58452	0.00117808	-1.36503	-6.68545	3.76553	0	-1.68284	-13.5526	P00966
P02545	LMNA	Prelamin-A/C;Lamin-A/C	30.7266	30.5625	30.5485	29.2913	29.3579	29.2433	29.9805	29.9331	29.8886	0.636567	0.000115984				+	+	FB-P_Ctrl;P-BF_Ctrl	31	29	29	45.8	44.4	44.4	74.139	0	306.28	14578000000	420	4.42319	0	-1.31503	-19.8845	3.37405	0	-0.678457	-10.7622	P02545
P04075	ALDOA	Fructose-bisphosphate aldolase A	26.7024	26.4479	26.3608	26.7622	Not detected	Not detected	25.8295	25.956	25.825	-0.892033	#DIV/0!					+	P-BF_Ctrl	6	6	6	23.9	23.9	23.9	39.42	0	30.744	1034400000	27	0	0.941631	0.258474	0	2.33016	0.00107463	-0.633533	-5.70205	P04075
P04080	CSTB	Cystatin-B	29.0915	29.0866	28.9155	28.2552	28.1397	28.0925	27.8258	29.1604	29.2338	0.577533	0.277755				+		FB-P_Ctrl	3	3	3	45.9	45.9	45.9	11.139	0	23.354	5509300000	149	3.48958	0	-0.868754	-11.5228	0.250223	0.651867	-0.291217	-0.631415	P04080
P04083	ANXA1	Annexin A1	27.1183	26.8098	26.6476	25.163	25.6928	25.7064	24.6564	24.7207	24.5563	-0.876267	0.00909314				+	+	FB-P_Ctrl;P-BF_Ctrl	9	9	9	35.5	35.5	35.5	38.714	0	49.755	779420000	33	2.38951	0.00150696	-1.33783	-5.9199	3.95647	0	-2.2141	-15.154	P04083
P04181	OAT	Ornithine aminotransferase, mitochondrial;Ornithine aminotransferase, hepatic form;Ornithine aminotransferase, renal form	27.4994	27.4761	27.1319	Not detected	25.5121	Not detected	25.5784	25.7208	25.9124	0.2251	#DIV/0!					+	P-BF_Ctrl	11	11	11	34.6	34.6	34.6	48.534	0	22.802	1758200000	62	0	0.941972	-1.85707	0	3.35625	0	-1.63198	-10.6494	P04181
P04406	GAPDH	Glyceraldehyde-3-phosphate dehydrogenase	31.6405	31.0511	30.8129	30.6777	31.0759	31.0239	30.2964	29.9552	30.3093	-0.738867	0.0123086					+	P-BF_Ctrl	18	18	18	63.3	63.3	63.3	36.053	0	272.87	23717000000	449	0.367173	0.384313	-0.242328	-0.878318	1.64611	0.00445466	-0.981207	-3.6084	P04406;O14556
P04637	TP53	Cellular tumor antigen p53	28.371	28.219	28.1765	27.6893	28.091	28.2723	27.4209	27.3669	27.0941	-0.723567	0.0223131					+	P-BF_Ctrl	8	8	8	29.8	29.8	29.8	43.653	0	39.603	3640400000	89	0.582797	0.143657	-0.237991	-1.30683	2.92076	0.000112019	-0.961545	-8.20881	P04637
P04843	RPN1	Dolichyl-diphosphooligosaccharide--protein glycosyltransferase subunit 1	29.6271	29.4024	29.3202	28.7014	28.5316	28.729	28.8194	28.9842	28.8411	0.227567	0.0475073				+	+	FB-P_Ctrl;P-BF_Ctrl	23	23	23	53.9	53.9	53.9	68.569	0	194.85	9831300000	267	2.70492	0.000869136	-0.795891	-7.19939	2.24414	0.00144179	-0.568326	-5.39798	P04843
P04844	RPN2	Dolichyl-diphosphooligosaccharide--protein glycosyltransferase subunit 2	28.7875	28.5113	28.4525	27.8048	27.8538	27.8394	27.6657	27.7441	27.704	-0.128067	0.00890208				+	+	FB-P_Ctrl;P-BF_Ctrl	14	14	14	33.9	33.9	33.9	69.283	0	151.95	5075700000	190	2.70579	0.000872367	-0.751116	-7.20319	2.94255	0.000113609	-0.879173	-8.31746	P04844
P05023	ATP1A1	Sodium/potassium-transporting ATPase subunit alpha-1	29.1255	28.9327	28.8853	27.6479	27.4548	27.3034	27.691	27.5837	27.5895	0.1527	0.221717				+	+	FB-P_Ctrl;P-BF_Ctrl	19	19	19	24.1	24.1	24.1	112.89	0	144.21	6501700000	243	3.58858	0	-1.51245	-12.2149	4.12585	0	-1.35975	-16.7275	P05023;P13637;P50993;Q13733;P20648;P54707
P05114	HMGN1	Non-histone chromosomal protein HMG-14	29.541	29.5404	29.3321	26.1692	Not detected	26.9798	28.4071	27.851	27.6638	1.39947	0.0439897				+	+	FB-P_Ctrl;P-BF_Ctrl	7	7	7	37	37	37	10.659	0	92.964	5649400000	98	2.56493	0.00115955	-2.89666	-9.1918	2.51524	0.000720588	-1.49722	-6.40438	P05114
P05141	SLC25A5	ADP/ATP translocase 2;ADP/ATP translocase 2, N-terminally processed	33.108	33.0195	33.0129	32.0624	32.0567	32.0594	32.0862	32.2392	32.289	0.1453	0.0759554				+	+	FB-P_Ctrl;P-BF_Ctrl	13	13	5	35.6	35.6	14.8	32.852	0	88.661	96139000000	550	5.25397	0	-0.987293	-32.1612	3.60434	0	-0.84201	-12.3288	P05141;Q9H0C2
P05165	PCCA	Propionyl-CoA carboxylase alpha chain, mitochondrial	35.2938	35.2512	35.2258	33.8848	33.5651	33.5863	35.2535	35.0105	35.0451	1.4243	0.000372443				+		FB-P_Ctrl	44	44	44	55.2	55.2	55.2	80.058	0	323.31	3074400000000000	2602	3.94102	0	-1.57818	-15.018	0.916287	0.0331327	-0.153903	-1.96213	P05165
P05166	PCCB	Propionyl-CoA carboxylase beta chain, mitochondrial	34.8582	34.7999	34.7934	32.8376	32.7808	32.9053	34.6452	34.3586	34.3777	1.61927	8.26593e-05				+	+	FB-P_Ctrl;P-BF_Ctrl	23	23	23	52.3	52.3	52.3	58.215	0	323.31	2221200000000000	1543	5.9355	0	-1.97589	-47.6535	1.7052	0.00419569	-0.356632	-3.76348	P05166
P05198	EIF2S1	Eukaryotic translation initiation factor 2 subunit 1	27.5115	27.4451	27.3253	26.7033	26.7239	26.9813	26.2318	26.1735	26.0468	-0.652133	0.0033941				+	+	FB-P_Ctrl;P-BF_Ctrl	10	10	10	40	40	40	36.112	0	90.856	2157400000	85	2.40099	0.00152209	-0.624451	-5.96278	4.10741	0	-1.27659	-16.5488	P05198
P05387	RPLP2	60S acidic ribosomal protein P2	31.347	31.3177	31.0685	30.7705	30.6355	30.6182	29.9995	30.6412	30.6716	-0.2373	0.349864				+	+	FB-P_Ctrl;P-BF_Ctrl	9	9	9	80.9	80.9	80.9	11.665	0	258.22	31265000000	422	2.31892	0.00144656	-0.569719	-5.66156	1.57038	0.00503602	-0.806977	-3.41546	P05387
P05388	RPLP0	60S acidic ribosomal protein P0;60S acidic ribosomal protein P0-like	31.1422	30.4772	30.4615	29.2349	29.2146	29.0719	29.509	29.9699	29.9027	0.620067	0.0153142				+	+	FB-P_Ctrl;P-BF_Ctrl	11	11	11	40.1	40.1	40.1	34.273	0	109.89	17449000000	256	2.56476	0.00115695	-1.51986	-6.60422	1.55492	0.00531936	-0.899786	-3.37686	P05388;Q8NHW5
P05412	JUN	Transcription factor AP-1	26.8962	26.7827	26.7443	26.874	27.108	27.3234	27.2047	27.0137	26.9745	-0.0375	0.812431					+	P-BF_Ctrl	5	5	4	24.8	24.8	22.4	35.675	0	97.01	1010500000	64	1.00287	0.0317922	0.294037	2.13773	1.41471	0.00758726	0.256585	3.03781	P05412
P05455	SSB	Lupus La protein	29.9028	29.8552	29.6563	28.9058	29.8049	29.9734	29.0743	29.0581	29.3386	-0.404367	0.304527					+	P-BF_Ctrl	18	18	18	43.6	43.6	43.6	46.836	0	100.49	11444000000	171	0.289538	0.555562	-0.24343	-0.716288	2.26817	0.00137318	-0.647769	-5.48157	P05455
P05783	KRT18	Keratin, type I cytoskeletal 18	31.51	31.4598	31.4068	30.3775	30.128	30.5502	30.0885	30.1264	30.124	-0.238933	0.124374				+	+	FB-P_Ctrl;P-BF_Ctrl	27	25	19	62.1	58.4	46.5	48.057	0	213.19	29813000000	334	3.03197	0.000475436	-1.10696	-8.77729	5.70679	0	-1.3459	-41.7659	P05783;CON__H-INV:HIT000015463;CON__Q497I4
P06454	PTMA	Prothymosin alpha;Prothymosin alpha, N-terminally processed;Thymosin alpha-1	28.5981	28.4961	28.3179	25.9576	27.0646	26.8356	27.649	27.627	27.5809	0.9997	0.0416387				+	+	FB-P_Ctrl;P-BF_Ctrl	3	3	3	33.3	33.3	33.3	12.203	0	97.906	2328700000	47	2.22525	0.0016766	-1.85145	-5.33302	3.26733	0	-0.85172	-10.102	P06454
P06493	CDK1	Cyclin-dependent kinase 1	30.6553	30.4078	30.3824	29.8138	29.8273	29.9881	29.732	29.5753	29.615	-0.235633	0.0322031				+	+	FB-P_Ctrl;P-BF_Ctrl	19	18	17	72.1	69.4	65.7	34.095	0	143.55	18095000000	479	2.37061	0.00148337	-0.605452	-5.84978	2.97877	0.000116505	-0.841075	-8.50101	P06493
P06576	ATP5B	ATP synthase subunit beta, mitochondrial	30.8775	30.858	30.7101	29.3939	29.5239	29.2694	29.4996	29.6706	29.4387	0.140567	0.236691				+	+	FB-P_Ctrl;P-BF_Ctrl	25	25	25	69.8	69.8	69.8	56.559	0	323.31	23748000000	746	4.01533	0	-1.41945	-15.6838	3.89964	0	-1.27893	-14.6591	P06576
P06730	EIF4E	Eukaryotic translation initiation factor 4E	28.0396	27.8157	27.8043	27.3235	26.9671	27.4452	26.8799	26.8029	26.638	-0.471667	0.0422235				+	+	FB-P_Ctrl;P-BF_Ctrl	3	3	3	27.6	27.6	27.6	25.097	0	28.938	3402300000	70	1.7717	0.00400581	-0.641255	-3.94308	3.35309	0	-1.1129	-10.6294	P06730
P06733	ENO1	Alpha-enolase	33.7614	33.6356	33.5155	32.6678	33.0094	33.0113	32.3005	32.8113	32.619	-0.319233	0.164172				+	+	FB-P_Ctrl;P-BF_Ctrl	27	27	26	59.7	59.7	55.5	47.168	0	323.31	1587700000000000	1530	2.27723	0.00152842	-0.741343	-5.51338	2.52112	0.000722581	-1.06053	-6.42781	P06733;P13929
P06737	PYGL	Glycogen phosphorylase, liver form	27.8452	27.6636	27.6624	26.3488	25.4854	26.0509	25.9472	25.8257	25.9166	-0.0652	0.811391				+	+	FB-P_Ctrl;P-BF_Ctrl	19	19	16	27.6	27.6	23.3	97.147	0	39.17	2209300000	71	2.60409	0.00118894	-1.76203	-6.76672	4.87197	0	-1.82724	-25.7897	P06737;P11217
P06748	NPM1	Nucleophosmin	35.0282	35.0236	34.8461	33.5851	33.8471	33.8391	33.2969	33.5283	33.5882	-0.285967	0.0817906				+	+	FB-P_Ctrl;P-BF_Ctrl	14	14	14	49.7	49.7	49.7	32.575	0	323.31	3529200000000000	1510	3.49045	0	-1.20885	-11.5287	3.81494	0	-1.49478	-13.9505	P06748
Q16778	HIST2H2BE	Histone H2B type 2-E;Histone H2B type 1-B;Histone H2B type 1-O;Histone H2B type 1-J;Histone H2B type 3-B	34.4742	34.43	34.0779	32.9289	32.9507	32.8279	33.4363	33.5504	33.4999	0.593033	0.000294008				+	+	FB-P_Ctrl;P-BF_Ctrl	6	6	2	41.3	41.3	7.9	13.92	0	231.8	2261100000000000	873	3.39222	0.000225352	-1.42488	-10.8786	2.51795	0.000721915	-0.831875	-6.41516	Q16778;P33778;P23527;P06899;Q8N257;Q6DRA6;Q6DN03
P07195	LDHB	L-lactate dehydrogenase B chain	28.4264	28.3564	28.2469	27.7208	27.7378	27.7744	27.9498	28.0272	27.9853	0.2431	0.000890754				+	+	FB-P_Ctrl;P-BF_Ctrl	10	10	10	28.7	28.7	28.7	36.638	0	99.549	4507400000	119	3.4071	0.000230216	-0.598931	-10.9748	2.47914	0.000794198	-0.355829	-6.26197	P07195
P07305	H1F0	Histone H1.0;Histone H1.0, N-terminally processed	27.9742	27.9384	27.6824	Not detected	26.6877	27.268	26.9109	27.4394	27.4088	0.275183	0.439185					+	P-BF_Ctrl	6	6	6	27.8	27.8	27.8	20.863	0	17.806	2342300000	21	1.43353	0.01002	-0.887165	-3.59651	1.46149	0.00688756	-0.611999	-3.14877	P07305
P07355	ANXA2	Annexin A2;Putative annexin A2-like protein	31.6785	31.5769	31.518	30.3494	30.6275	30.6125	29.9688	30.1991	30.0335	-0.462667	0.0150948				+	+	FB-P_Ctrl;P-BF_Ctrl	24	24	24	55.8	55.8	55.8	38.604	0	323.31	35585000000	760	3.32163	0.00020339	-1.06133	-10.433	4.28518	0	-1.52397	-18.3525	P07355;A6NMY6
P07384	CAPN1	Calpain-1 catalytic subunit	26.0745	25.9675	25.8265	25.33	Not detected	25.0952	Not detected	24.7166	Not detected	-0.496	#DIV/0!				+		FB-P_Ctrl	7	7	7	12.2	12.2	12.2	81.889	0	10.081	775290000	36	1.99829	0.00266346	-0.74356	-5.8327	0	0.963059	-1.2395	0	P07384
P07437	TUBB	Tubulin beta chain	33.6334	33.3657	33.3453	32.1909	32.4179	32.5007	32.1644	32.4154	32.2661	-0.0878667	0.497349				+	+	FB-P_Ctrl;P-BF_Ctrl	20	20	5	52.3	52.3	16.2	49.67	0	323.31	1535400000000000	1771	2.92366	0.000434783	-1.0783	-8.22318	3.23005	0	-1.16617	-9.88046	P07437;CON__ENSEMBL:ENSBTAP00000025008;Q9H4B7
P07814	EPRS	Bifunctional glutamate/proline--tRNA ligase;Glutamate--tRNA ligase;Proline--tRNA ligase	30.9495	30.8818	30.8802	29.6583	29.5123	29.5536	29.9698	29.645	29.5594	0.15	0.320346				+	+	FB-P_Ctrl;P-BF_Ctrl	45	45	45	37.4	37.4	37.4	170.59	0	323.31	25301000000	528	4.95633	0	-1.32907	-27.0793	3.12472	0	-1.17907	-9.27879	P07814
P07900	HSP90AA1	Heat shock protein HSP 90-alpha	30.9024	30.7018	30.6681	28.7443	29.1625	29.1851	29.5692	29.592	29.4373	0.5022	0.0293449				+	+	FB-P_Ctrl;P-BF_Ctrl	35	18	18	43	25	25	84.659	0	208.72	19117000000	416	3.3694	0.00021968	-1.72682	-10.7326	3.81871	0	-1.22458	-13.9813	P07900;Q14568;Q58FG0;Q58FG1
P07910	HNRNPC	Heterogeneous nuclear ribonucleoproteins C1/C2;Heterogeneous nuclear ribonucleoprotein C-like 4;Heterogeneous nuclear ribonucleoprotein C-like 1;Heterogeneous nuclear ribonucleoprotein C-like 3;Heterogeneous nuclear ribonucleoprotein C-like 2	30.7336	30.6809	30.5583	29.7085	29.6246	29.441	30.3342	30.5018	30.4113	0.8244	0.000881776				+	+	FB-P_Ctrl;P-BF_Ctrl	11	11	11	28.8	28.8	28.8	33.67	0	82.688	18823000000	343	3.45345	0	-1.0662	-11.2796	1.5661	0.00516625	-0.241809	-3.40476	P07910;P0DMR1;O60812;B7ZW38;B2RXH8
P08195	SLC3A2	4F2 cell-surface antigen heavy chain	28.1842	28.1228	28.0997	25.8616	25.716	25.8766	24.5284	26.5263	26.462	0.0208333	0.976241				+	+	FB-P_Ctrl;P-BF_Ctrl	13	13	13	28.1	28.1	28.1	67.993	0	34.014	2317600000	82	5.65756	0	-2.31753	-40.5966	1.60428	0.00469981	-2.29666	-3.50106	P08195
P08237	PFKM	ATP-dependent 6-phosphofructokinase, muscle type	26.3344	26.2983	26.1118	25.9033	25.404	25.3339	25.9738	Not detected	Not detected	0.426733	#DIV/0!				+		FB-P_Ctrl	14	11	11	24.6	21.2	21.2	85.182	0	35.49	1016900000	48	1.66214	0.00523975	-0.701132	-3.65008	0	0.962355	-0.274432	0	P08237
P08238	HSP90AB1	Heat shock protein HSP 90-beta	33.1372	33.1357	33.0623	31.8807	31.9342	31.717	31.912	31.9462	31.8473	0.0578667	0.463613				+	+	FB-P_Ctrl;P-BF_Ctrl	38	38	17	49.9	49.9	27.3	83.263	0	323.31	1114500000000000	1266	4.26584	0	-1.26779	-18.1474	5.23185	0	-1.20992	-31.7529	P08238;Q58FF7
P08240	SRPR	Signal recognition particle receptor subunit alpha	27.7631	27.4758	27.4736	26.3727	26.2786	26.1668	26.6716	26.7955	26.6894	0.446133	0.00327169				+	+	FB-P_Ctrl;P-BF_Ctrl	13	13	13	26	26	26	69.81	0	40.422	2491300000	80	3.48339	0	-1.29811	-11.4808	2.92339	0.000112412	-0.85199	-8.22185	P08240
P08243	ASNS	Asparagine synthetase [glutamine-hydrolyzing]	30.6037	30.5008	30.4778	30.0251	30.1279	29.9341	29.0215	29.0807	29.243	-0.913967	0.000458103				+	+	FB-P_Ctrl;P-BF_Ctrl	25	25	25	53.1	53.1	53.1	64.369	0	189.41	19578000000	385	2.73235	0.000745932	-0.498377	-7.32119	4.29094	0	-1.41233	-18.4141	P08243
P08621	SNRNP70	U1 small nuclear ribonucleoprotein 70 kDa	29.1658	29.1233	29.0722	28.8571	28.7399	28.9313	29.188	29.0561	29.0999	0.2719	0.0160599				+		FB-P_Ctrl	14	14	14	38.7	38.7	38.7	51.556	0	116.18	7863200000	184	1.96005	0.00276489	-0.277649	-4.48313	0.0414427	1	-0.00575829	-0.121726	P08621
P08670	VIM	Vimentin	33.2637	33.2531	33.1173	32.8818	32.6846	32.7142	32.9368	32.9434	32.9276	0.175733	0.0461952				+	+	FB-P_Ctrl;P-BF_Ctrl	38	38	35	72.5	72.5	68.7	53.651	0	323.31	130200000000000	1651	2.365	0.00148047	-0.451187	-5.82909	2.36129	0.00101437	-0.275457	-5.81548	P08670;P17661;P41219;P07197
P08708	RPS17	40S ribosomal protein S17	28.0669	27.958	27.9396	27.0792	26.6815	27.1476	24.8853	25.6944	26.1848	-1.38127	0.0271789				+	+	FB-P_Ctrl;P-BF_Ctrl	5	5	5	43.7	43.7	43.7	15.55	0	140.79	2996500000	92	2.60307	0.00118757	-1.01873	-6.76248	2.48885	0.00079927	-2.4	-6.3	P08708
P09012	SNRPA	U1 small nuclear ribonucleoprotein A	28.6434	28.3795	28.3113	28.5767	28.3269	28.5476	29.0448	28.7109	28.836	0.380167	0.0386451					+	P-BF_Ctrl	7	5	5	30.9	25.5	25.5	31.279	0	54.823	4215200000	61	0.109905	0.911301	0.0390008	0.303814	1.39124	0.00802109	0.419162	2.9829	P09012
P09429	HMGB1	High mobility group protein B1	29.6483	29.4504	28.7197	34.442	34.4451	34.2169	32.1611	32.3572	32.0838	-2.1673	4.06267e-05				+	+	FB-P_Ctrl;P-BF_Ctrl	14	14	13	32.6	32.6	28.4	24.893	0	323.31	38935000000	301	4.19649	0	5.09521	17.4298	3.24398	0	2.9279	9.9627	P09429;B2RPK0
P09651	HNRNPA1	Heterogeneous nuclear ribonucleoprotein A1;Heterogeneous nuclear ribonucleoprotein A1, N-terminally processed;Heterogeneous nuclear ribonucleoprotein A1-like 2	34.331	34.0881	34.0684	32.7779	33.6439	33.3355	34.1725	34.1922	34.2439	0.950433	0.0201688				+		FB-P_Ctrl	17	17	17	44.4	44.4	44.4	38.746	0	323.31	2255300000000000	1102	1.56708	0.00694695	-0.910058	-3.40721	0.175822	0.81832	0.0403608	0.463535	P09651;Q32P51
P09661	SNRPA1	U2 small nuclear ribonucleoprotein A	30.6537	30.6192	30.5668	30.6225	30.5463	30.6088	30.2052	30.3611	30.3747	-0.278867	0.0092451					+	P-BF_Ctrl	17	17	17	63.9	63.9	63.9	28.415	0	323.31	18661000000	545	0.236507	0.678793	-0.0207233	-0.601247	2.12482	0.00190944	-0.299562	-4.99783	P09661
P09874	PARP1	Poly [ADP-ribose] polymerase 1	32.7229	32.6996	32.5763	32.0793	32.0078	32.1561	32.4023	32.2737	32.3429	0.258567	0.0103338				+	+	FB-P_Ctrl;P-BF_Ctrl	44	44	44	49.1	49.1	49.1	113.08	0	323.31	71944000000	1335	3.14061	0.000168421	-0.585191	-9.36735	2.29083	0.00139116	-0.326608	-5.56135	P09874
P09884	POLA1	DNA polymerase alpha catalytic subunit	28.3375	28.0766	28.0479	29.5494	29.4047	29.7125	28.9877	28.9598	28.8648	-0.6181	0.00303724				+	+	FB-P_Ctrl;P-BF_Ctrl	30	30	30	28.8	28.8	28.8	165.91	0	106.93	4767600000	167	3.40289	0.000228029	1.40154	10.9475	2.85411	0.000108108	0.783431	7.88437	P09884
Q71UI9	H2AFV	Histone H2A.V;Histone H2A.Z	29.6547	29.5291	29.4667	28.3688	27.6412	28.1255	28.4965	28.3506	28.5688	0.4268	0.128507				+	+	FB-P_Ctrl;P-BF_Ctrl	4	2	2	31.2	18.8	18.8	13.509	0	13.466	7390200000	88	2.6154	0.00119169	-1.50503	-6.81411	3.65861	0	-1.07824	-12.7284	Q71UI9;P0C0S5
Q99878	HIST1H2AJ	Histone H2A type 1-J;Histone H2A type 1-H;Histone H2A.J;Histone H2A type 1-D;Histone H2A type 1;Histone H2A type 2-C;Histone H2A type 2-A	34.2284	34.0369	34.0138	33.5813	33.6269	33.398	34.3864	34.968	34.5271	1.09177	0.00442903				+	+	FB-P_Ctrl;P-BF_Ctrl	5	5	1	58.6	58.6	8.6	13.936	0	133.8	2191800000000000	418	2.33402	0.00145769	-0.557636	-5.716	1.33013	0.009588	0.534129	2.84228	Q99878;Q96KK5;Q9BTM1;P20671;P0C0S8;Q16777;Q6FI13
P62987	UBA52	Ubiquitin-60S ribosomal protein L40;Ubiquitin;60S ribosomal protein L40;Ubiquitin-40S ribosomal protein S27a;Ubiquitin;40S ribosomal protein S27a;Polyubiquitin-B;Ubiquitin;Polyubiquitin-C;Ubiquitin	31.9151	31.8404	31.7939	31.0265	31.1338	30.9906	30.1492	31.4731	31.5029	-0.00856667	0.985673				+		FB-P_Ctrl	8	8	8	43	43	43	14.728	0	168.04	41533000000	531	3.86582	0	-0.799513	-14.3721	0.83728	0.0434104	-0.808063	-1.80463	P62987;P62979;P0CG47;P0CG48
P0CJ79	ZNF888	Zinc finger protein 888;Zinc finger protein 468;Zinc finger protein 28;Zinc finger protein 765;Zinc finger protein 813	27.4958	27.4406	27.3102	28.3176	28.3062	28.5327	28.6829	27.9695	28.5372	0.0110333	0.964				+	+	FB-P_Ctrl;P-BF_Ctrl	5	5	3	8.8	8.8	6	83.548	0	10.934	2729600000	35	3.33979	0.000208243	0.969976	10.546	1.92203	0.00292199	0.981016	4.37016	P0CJ79;Q5VIY5;P17035;Q7L2R6;Q6ZN06;Q5HY98;Q9NV72;Q86XN6;Q08AN1;Q9HCG1;Q6ZNA1
P0DMV9	HSPA1B	Heat shock 70 kDa protein 1B;Heat shock 70 kDa protein 1A	34.8368	34.8149	34.8058	34.6464	34.4549	34.5096	34.5446	34.5818	34.4507	-0.0112667	0.87826				+	+	FB-P_Ctrl;P-BF_Ctrl	31	29	18	52.6	50.5	28.9	70.051	0	323.31	4322400000000000	2713	2.09187	0.00234644	-0.2822	-4.89148	2.73169	0.000298319	-0.29346	-7.31826	P0DMV9;P0DMV8
P0DP25	CALM3	Calmodulin-3	29.0747	29.0079	28.9265	28.7376	28.6432	28.7496	27.7593	27.7503	27.6362	-0.994867	4.39024e-05				+	+	FB-P_Ctrl;P-BF_Ctrl	9	9	9	60.4	60.4	60.4	16.837	0	83.373	5236800000	109	2.23781	0.00168574	-0.292919	-5.37616	4.6024	0	-1.2878	-22.0626	P0DP25;P0DP24;P0DP23;P27482;P02585
P10398	ARAF	Serine/threonine-protein kinase A-Raf	26.1556	26.0573	25.8345	25.5889	25.2047	Not detected	24.7999	25.167	24.5569	-0.555533	0.131829					+	P-BF_Ctrl	7	7	4	12.4	12.4	7.8	67.585	0	11.002	757910000	32	1.33453	0.0119323	-0.61906	-3.28394	2.36774	0.00101695	-1.17458	-5.83921	P10398
P10412	HIST1H1E	Histone H1.4	34.9386	34.7484	34.6394	32.7449	33.0646	32.913	34.2602	34.4494	34.0839	1.357	0.000637955				+	+	FB-P_Ctrl;P-BF_Ctrl	11	11	3	26.9	26.9	9.6	21.865	0	224.96	2381500000000000	562	3.90337	0	-1.86796	-14.6912	1.6919	0.00430909	-0.51097	-3.72822	P10412
P10599	TXN	Thioredoxin	27.9879	27.8835	27.7867	26.9932	27.1758	27.3903	27.1149	27.5263	27.6264	0.2361	0.290644				+		FB-P_Ctrl	4	4	4	34.3	34.3	34.3	11.737	0	17.573	2382800000	65	2.25622	0.00150459	-0.699591	-5.43988	1.30091	0.0100799	-0.463495	-2.77617	P10599
P10636	MAPT	Microtubule-associated protein tau	28.3784	28.3028	28.1914	27.3217	28.2628	27.4916	27.1239	27.1655	26.5965	-0.730067	0.10011					+	P-BF_Ctrl	9	9	9	19.3	19.3	19.3	78.927	0	118.58	3760600000	96	0.951323	0.0373412	-0.598877	-2.03276	2.64922	0.000680514	-1.32894	-6.95747	P10636
P10809	HSPD1	60 kDa heat shock protein, mitochondrial	31.5661	31.4512	31.4051	29.7269	29.507	29.7335	30.138	30.2272	30.0022	0.466667	0.00924169				+	+	FB-P_Ctrl;P-BF_Ctrl	24	24	24	48	48	48	61.054	0	274.29	33716000000	535	4.47969	0	-1.81829	-20.5473	4.12047	0	-1.35162	-16.6751	P10809
P11021	HSPA5	78 kDa glucose-regulated protein	31.3213	31.2701	31.2658	30.7804	30.7	30.6903	30.2969	30.0976	30.3114	-0.488267	0.00282427				+	+	FB-P_Ctrl;P-BF_Ctrl	33	33	32	50.8	50.8	50.8	72.332	0	323.31	32621000000	765	4.12264	0	-0.562171	-16.6962	3.90967	0	-1.05045	-14.7454	P11021
P11142	HSPA8	Heat shock cognate 71 kDa protein	33.7254	33.6561	33.5976	34.406	34.1236	34.2557	34.1712	34.0175	34.052	-0.181533	0.125435				+	+	FB-P_Ctrl;P-BF_Ctrl	32	31	23	49.4	49.4	37.5	70.897	0	323.31	2151600000000000	2211	2.59369	0.00118349	0.602105	6.72344	2.67641	0.000508577	0.420572	7.07464	P11142
P11171	EPB41	Protein 4.1	32.0536	31.957	31.9443	30.9275	30.7754	30.7483	30.3326	30.1607	30.0711	-0.628933	0.00268388				+	+	FB-P_Ctrl;P-BF_Ctrl	34	33	32	48.7	47.6	45.8	97.016	0	323.31	54500000000	1068	4.23314	0	-1.16784	-17.8055	4.54686	0	-1.79679	-21.3635	P11171
P11172	UMPS	Uridine 5-monophosphate synthase;Orotate phosphoribosyltransferase;Orotidine 5-phosphate decarboxylase	24.9957	24.5003	24.1605	Not detected	Not detected	Not detected	23.518	23.6511	23.4377	#DIV/0!	#DIV/0!					+	P-BF_Ctrl	2	2	2	5.6	5.6	5.6	52.221	0.00031309	4.7659	174620000	14	0	0.931431	Not detected	0	1.8141	0.00377884	-1.01655	-4.06049	P11172
P11216	PYGB	Glycogen phosphorylase, brain form	26.2099	26.0877	25.9969	Not detected	Not detected	Not detected	24.8307	24.6652	Not detected	#DIV/0!	#DIV/0!					+	P-BF_Ctrl	9	6	6	14.7	10.3	10.3	96.695	0	21.761	706280000	36	0	0.934684	Not detected	0	3.0466	0	-1.35022	-13.4013	P11216
P11387	TOP1	DNA topoisomerase 1	29.9998	29.979	29.6923	27.893	28.0226	27.9284	28.8358	28.8942	28.8773	0.9211	2.65332e-05				+	+	FB-P_Ctrl;P-BF_Ctrl	18	18	18	26.8	26.8	26.8	90.725	0	132.3	9063900000	236	4.2744	0	-1.94232	-18.2379	3.2733	0	-1.02125	-10.1379	P11387;Q969P6
P11388	TOP2A	DNA topoisomerase 2-alpha	29.8418	29.7617	29.6799	28.5634	28.2429	28.5851	28.8545	28.7594	28.5226	0.248367	0.169165				+	+	FB-P_Ctrl;P-BF_Ctrl	38	38	29	27.7	27.7	22.3	174.38	0	144.61	9854100000	265	3.38029	0.000223776	-1.29729	-10.8021	3.18285	0	-1.04893	-9.60648	P11388
P11413	G6PD	Glucose-6-phosphate 1-dehydrogenase	27.1731	27.1667	27.0875	25.7907	26.0579	26.3193	25.7851	25.5902	25.4078	-0.4616	0.0695433				+	+	FB-P_Ctrl;P-BF_Ctrl	11	11	11	26	26	26	59.256	0	34.635	1686000000	91	2.66091	0.00122711	-1.0865	-7.00765	3.79387	0	-1.54809	-13.7794	P11413
P11498	PC	Pyruvate carboxylase, mitochondrial	35.9985	35.9739	35.9734	34.6992	34.679	34.7435	36.165	36.081	36.0084	1.37757	9.59597e-06				+		FB-P_Ctrl	54	54	54	59.9	59.9	59.9	129.63	0	323.31	6412600000000000	4548	6.37485	0	-1.2747	-61.3843	1.05132	0.0212017	0.102891	2.23763	P11498
P11586	MTHFD1	C-1-tetrahydrofolate synthase, cytoplasmic;Methylenetetrahydrofolate dehydrogenase;Methenyltetrahydrofolate cyclohydrolase;Formyltetrahydrofolate synthetase;C-1-tetrahydrofolate synthase, cytoplasmic, N-terminally processed	29.8223	29.7339	29.6159	28.8293	28.6931	28.5435	28.7437	28.8264	28.6599	0.0547	0.59749				+	+	FB-P_Ctrl;P-BF_Ctrl	25	25	25	31.6	31.6	31.6	101.53	0	141.42	10912000000	402	3.27716	0.000192771	-1.03544	-10.1612	3.66571	0	-0.980706	-12.7816	P11586
P11940	PABPC1	Polyadenylate-binding protein 1	30.2321	30.2238	30.1655	29.8669	29.7495	29.7765	29.6788	29.8037	29.749	-0.0538	0.348146				+	+	FB-P_Ctrl;P-BF_Ctrl	24	24	17	44.5	44.5	33.2	70.67	0	323.31	17494000000	574	3.23999	0.000185687	-0.409544	-9.93907	3.42506	0	-0.463321	-11.092	P11940;Q9H361;Q4VXU2;Q5JQF8;Q96DU9
P12004	PCNA	Proliferating cell nuclear antigen	27.0361	26.9277	26.9007	26.5902	25.724	25.9427	25.2228	25.5645	25.644	-0.608533	0.104173				+	+	FB-P_Ctrl;P-BF_Ctrl	6	6	6	26.8	26.8	26.8	28.768	0	43.334	1458000000	68	1.52412	0.00813856	-0.869217	-3.30069	3.39452	0	-1.47773	-10.8934	P12004
P12081	HARS	Histidine--tRNA ligase, cytoplasmic	28.2508	28.1627	28.0517	27.2828	27.2176	27.2207	27.0688	27.1206	27.0566	-0.158367	0.00540663				+	+	FB-P_Ctrl;P-BF_Ctrl	14	14	9	28.7	28.7	19.3	57.41	0	33.617	3492900000	144	3.92736	0	-0.914724	-14.8986	4.21633	0	-1.07308	-17.6322	P12081
P12235	SLC25A4	ADP/ATP translocase 1	26.3307	26.2412	26.1648	24.6688	25.4013	25.159	25.4074	25.2617	25.462	0.300667	0.24991				+	+	FB-P_Ctrl;P-BF_Ctrl	11	4	4	34.9	13.4	13.4	33.064	0	10.529	857450000	45	2.21477	0.00166308	-1.16921	-5.29723	3.46148	0	-0.868544	-11.3333	P12235
P12236	SLC25A6	ADP/ATP translocase 3;ADP/ATP translocase 3, N-terminally processed	28.9873	28.891	28.7447	28.9469	27.8057	27.9196	27.7985	28.2519	28.0321	-0.196567	0.637219					+	P-BF_Ctrl	12	4	3	40.3	16.4	12.8	32.866	0	17.082	5698000000	168	0.814099	0.0588316	-0.650227	-1.75883	2.32832	0.00107374	-0.846854	-5.6954	P12236
P12268	IMPDH2	Inosine-5-monophosphate dehydrogenase 2	27.4581	27.1929	27.1126	26.4849	26.4841	25.621	27.2075	26.5091	26.9358	0.687467	0.122816				+		FB-P_Ctrl	9	9	9	26.1	26.1	26.1	55.804	0	43.769	1810900000	46	1.58615	0.00658116	-1.05787	-3.45514	0.743866	0.0605045	-0.370373	-1.62089	P12268
P12270	TPR	Nucleoprotein TPR	32.1797	32.1128	31.9967	33.1522	32.8595	32.9117	33.2042	32.9615	32.9271	0.0564667	0.675856				+	+	FB-P_Ctrl;P-BF_Ctrl	106	106	106	48.5	48.5	48.5	267.29	0	323.31	59448000000	1552	2.95498	0.000446429	0.87803	8.38006	3.09916	0	0.934495	9.13805	P12270
P12277	CKB	Creatine kinase B-type	27.1947	27.1593	27.1248	27.4497	27.3417	27.3134	26.7137	26.7733	26.913	-0.568267	0.00140846				+	+	FB-P_Ctrl;P-BF_Ctrl	9	9	9	32.8	32.8	32.8	42.644	0	81.079	2024600000	144	1.97195	0.00278673	0.208644	4.51891	2.34718	0.00100587	-0.359634	-5.76381	P12277
P12532	CKMT1A	Creatine kinase U-type, mitochondrial	26.2479	26.1649	26.0766	Not detected	24.9236	24.9626	24.9303	25.8541	25.6956	0.550233	0.232222				+		FB-P_Ctrl	5	5	5	15.6	15.6	15.6	47.036	0	14.141	593870000	28	3.472	0	-1.22006	-18.635	1.0878	0.0193239	-0.66979	-2.31374	P12532
P13010	XRCC5	X-ray repair cross-complementing protein 5	28.5764	28.4697	28.3613	28.0888	28.1721	28.0871	28.5649	28.3344	28.5574	0.369567	0.0101658				+		FB-P_Ctrl	22	22	22	34.6	34.6	34.6	82.704	0	128.41	5301600000	182	2.18084	0.00210396	-0.353149	-5.18267	0.0581455	0.990754	0.0164439	0.168061	P13010
P13051	UNG	Uracil-DNA glycosylase	27.4472	27.4398	27.3656	27.8374	28.1934	28.3684	27.8392	28.2719	28.0212	-0.0889667	0.679967				+	+	FB-P_Ctrl;P-BF_Ctrl	11	11	11	48.2	48.2	48.2	34.645	0	42.117	2221700000	94	1.97143	0.00278233	0.715548	4.51736	2.09168	0.0021059	0.626544	4.89088	P13051
P13056	NR2C1	Nuclear receptor subfamily 2 group C member 1	26.8373	26.7457	26.6112	27.5632	27.5887	27.3036	26.9289	27.2299	26.8253	-0.490467	0.0318957				+		FB-P_Ctrl	11	10	10	29.2	28	28	67.314	0	323.31	1543900000	63	2.59114	0.00118213	0.753758	6.71282	0.889464	0.0356641	0.263279	1.9084	P13056
P13498	CYBA	Cytochrome b-245 light chain	27.2883	27.1214	27.087	25.6711	26.0059	26.2357	25.7142	25.8268	25.4966	-0.2917	0.20033				+	+	FB-P_Ctrl;P-BF_Ctrl	3	3	3	16.4	16.4	16.4	21.012	0.00030893	4.5382	1623400000	38	2.61554	0.00119306	-1.19467	-6.81469	3.68244	0	-1.48639	-12.9078	P13498
P13639	EEF2	Elongation factor 2	33.3205	33.0354	33.008	31.4647	31.7832	31.7163	31.3407	31.3932	31.2395	-0.330267	0.036631				+	+	FB-P_Ctrl;P-BF_Ctrl	34	33	33	42.2	41	41	95.337	0	323.31	1027300000000000	1100	3.33778	0.000207343	-1.46661	-10.5334	4.09094	0	-1.79687	-16.3907	P13639
P13796	LCP1	Plastin-2	30.4469	30.3565	30.3361	29.2001	29.4574	29.5529	28.9832	28.8653	29.0359	-0.442	0.0193664				+	+	FB-P_Ctrl;P-BF_Ctrl	28	28	23	55.5	55.5	47.5	70.288	0	323.31	14976000000	487	3.03931	0.000478469	-0.976323	-8.81609	4.69722	0	-1.41836	-23.3085	P13796
P13797	PLS3	Plastin-3	29.5397	29.5176	29.5125	28.4824	28.5533	28.6534	26.9021	27.1913	27.4245	-1.3904	0.000942999				+	+	FB-P_Ctrl;P-BF_Ctrl	26	21	19	47.5	39.5	35.4	70.81	0	160.17	8561300000	271	4.35274	0	-0.960293	-19.0873	3.99866	0	-2.35065	-15.532	P13797
P13804	ETFA	Electron transfer flavoprotein subunit alpha, mitochondrial	27.442	27.1749	27.1415	26.0023	26.3683	26.2689	26.7628	26.85	26.6179	0.5304	0.0145352				+	+	FB-P_Ctrl;P-BF_Ctrl	9	9	9	43.8	43.8	43.8	35.079	0	20.743	1646500000	62	2.70022	0.000865929	-1.03966	-7.17869	1.91986	0.00291578	-0.509241	-4.36376	P13804
P13861	PRKAR2A	cAMP-dependent protein kinase type II-alpha regulatory subunit	28.5429	28.538	28.5084	27.2576	27.4101	27.3435	26.3195	26.0064	26.4615	-1.0746	0.00161266				+	+	FB-P_Ctrl;P-BF_Ctrl	12	12	10	39.9	39.9	32.7	45.518	0	77.989	4776800000	146	4.90351	0	-1.19271	-26.2645	4.13419	0	-2.26731	-16.809	P13861
P13984	GTF2F2	General transcription factor IIF subunit 2	30.1719	30.1094	30.0865	30.7295	30.7655	30.7529	30.5423	30.3194	30.3874	-0.332933	0.00757304				+	+	FB-P_Ctrl;P-BF_Ctrl	16	16	16	68.7	68.7	68.7	28.38	0	198.47	16024000000	290	4.65135	0	0.626689	22.6974	1.84711	0.00355003	0.293779	4.15353	P13984
P14618	PKM	Pyruvate kinase PKM	32.4157	32.3645	32.3206	31.4981	31.653	31.6072	31.4618	31.3944	31.4521	-0.15	0.0412062				+	+	FB-P_Ctrl;P-BF_Ctrl	25	25	24	51.6	51.6	49.5	57.936	0	323.31	74985000000	1112	3.8913	0	-0.780858	-14.5879	4.94497	0	-0.930852	-26.9019	P14618
P14625	HSP90B1	Endoplasmin	28.985	28.9361	28.8367	26.6223	25.7266	25.968	25.7385	26.2931	Not detected	-0.0898333	0.837739				+	+	FB-P_Ctrl;P-BF_Ctrl	18	16	16	25.3	23.5	23.5	92.468	0	36.687	4962000000	146	3.31284	0.000201258	-2.81369	-10.3788	3.06113	0	-2.90344	-13.5535	P14625;Q58FF3
P63162	SNRPN	Small nuclear ribonucleoprotein-associated protein N;Small nuclear ribonucleoprotein-associated proteins B and B	28.7567	28.7028	28.6957	27.9412	27.8115	28.4224	27.959	28.5859	28.7838	0.384533	0.283109				+		FB-P_Ctrl	6	6	6	18.8	18.8	18.8	24.614	0	40.102	6785200000	224	1.6167	0.00586431	-0.660047	-3.53271	0.479909	0.1936	-0.275503	-1.10487	P63162;P14678
P14866	HNRNPL	Heterogeneous nuclear ribonucleoprotein L	31.4226	31.2808	31.2273	30.7511	30.5102	30.766	31.2461	31.0186	30.9773	0.4049	0.0262987				+		FB-P_Ctrl	17	17	17	43.3	43.3	43.3	64.132	0	323.31	34545000000	630	2.47935	0.00149631	-0.634469	-6.26276	1.05895	0.0208082	-0.229591	-2.2535	P14866
P14868	DARS	Aspartate--tRNA ligase, cytoplasmic	30.2356	30.1854	30.0927	29.0455	28.893	29.0207	29.1545	29.0181	29.1558	0.123067	0.134432				+	+	FB-P_Ctrl;P-BF_Ctrl	21	21	21	50.1	50.1	50.1	57.136	0	121.35	15488000000	373	4.32425	0	-1.18483	-18.7741	4.16774	0	-1.06179	-17.1406	P14868
P14923	JUP	Junction plakoglobin	27.6019	27.4919	27.4542	26.314	26.2536	26.0002	25.3172	25.7387	26.1929	-0.439667	0.179416				+	+	FB-P_Ctrl;P-BF_Ctrl	10	10	9	16.1	16.1	15.2	81.744	0	42.814	2305700000	62	3.63272	0	-1.32675	-12.5362	2.63121	0.000675835	-1.76637	-6.88081	P14923
P15170	GSPT1	Eukaryotic peptide chain release factor GTP-binding subunit ERF3A;Eukaryotic peptide chain release factor GTP-binding subunit ERF3B	29.6616	29.4689	29.3499	28.203	28.2283	27.8311	27.5853	27.353	27.6172	-0.568967	0.020508				+	+	FB-P_Ctrl;P-BF_Ctrl	14	14	14	33.9	33.9	33.9	55.755	0	93.415	8571100000	164	3.06258	0.00015534	-1.40597	-8.93997	4.05269	0	-1.97491	-16.0293	P15170;Q8IYD1
P15311	EZR	Ezrin	30.1703	30.1087	29.7798	29.2024	29.358	29.3785	29.1206	29.1473	29.1099	-0.187033	0.0299721				+	+	FB-P_Ctrl;P-BF_Ctrl	27	16	16	43.5	28.3	28.3	69.412	0	174.92	11961000000	212	2.21501	0.00166457	-0.706622	-5.29804	2.73662	0.000299262	-0.893672	-7.34029	P15311
P15531	NME1	Nucleoside diphosphate kinase A	30.1392	29.9826	29.9127	29.7652	29.9998	29.9375	28.9443	29.5909	29.5941	-0.5244	0.0821803					+	P-BF_Ctrl	10	10	6	64.5	64.5	39.5	17.149	0	149.15	12228000000	254	0.498359	0.206277	-0.110691	-1.14132	1.31477	0.00977523	-0.635068	-2.80744	P15531
P15822	HIVEP1	Zinc finger protein 40	24.4214	24.2481	24.2196	24.7407	24.5022	24.7566	24.9278	Not detected	24.9483	0.27155	0.0839513				+	+	FB-P_Ctrl;P-BF_Ctrl	5	5	5	2.8	2.8	2.8	296.86	0	6.4187	189280000	12	1.63139	0.00570492	0.370091	3.57039	2.36604	0.00101609	0.64165	7.85057	P15822
P15880	RPS2	40S ribosomal protein S2	32.3316	32.2432	32.2207	31.0526	31.2542	31.2376	30.7419	30.9854	30.8318	-0.328433	0.0268075				+	+	FB-P_Ctrl;P-BF_Ctrl	12	12	12	40.6	40.6	40.6	31.324	0	92.606	53837000000	516	3.92292	0	-1.08366	-14.86	4.24543	0	-1.41212	-17.9332	P15880
P15924	DSP	Desmoplakin	29.2816	29.2609	29.215	28.5508	28.7918	28.5857	27.8294	27.887	28.0751	-0.712267	0.00252124				+	+	FB-P_Ctrl;P-BF_Ctrl	43	43	43	19.7	19.7	19.7	331.77	0	145.42	8190700000	291	2.84536	0.00053406	-0.609697	-7.84263	4.17615	0	-1.32201	-17.2247	P15924
P15927	RPA2	Replication protein A 32 kDa subunit	26.6808	26.4767	26.4741	27.6911	27.2545	27.6409	27.7185	26.7015	27.7283	-0.146067	0.711333				+		FB-P_Ctrl	6	6	6	31.1	31.1	31.1	29.247	0	11.168	1336500000	61	2.5132	0.00122174	0.984905	6.39623	1.13538	0.0165145	0.838844	2.41422	P15927
P16104	H2AFX	Histone H2AX;Histone H2A type 1-A	28.1762	28.0548	27.8269	27.0344	26.1398	25.7727	Not detected	22.6443	23.5568	-3.21508	0.0122121				+	+	FB-P_Ctrl;P-BF_Ctrl	5	2	0	52.4	21	0	15.144	0	19.807	1880500000	28	1.92742	0.00280062	-1.70369	-4.38604	3.05418	0	-4.91877	-13.4805	P16104;Q96QV6
P16152	CBR1	Carbonyl reductase [NADPH] 1	28.7997	28.4809	28.0928	26.9925	27.0779	27.1669	26.5289	27.1167	27.0182	-0.191167	0.368097				+	+	FB-P_Ctrl;P-BF_Ctrl	11	11	9	55.2	55.2	44.8	30.375	0	173.88	2837400000	137	2.55145	0.00114286	-1.3787	-6.54998	2.3405	0.00100167	-1.56985	-5.73951	P16152
P16333	NCK1	Cytoplasmic protein NCK1	28.8969	28.7156	28.7152	29.0759	28.7861	28.9325	28.4073	28.5403	28.2301	-0.538933	0.0117838					+	P-BF_Ctrl	15	15	14	46.9	46.9	44.8	42.864	0	88.477	6093300000	226	0.685613	0.0943656	0.155591	1.50717	1.61925	0.00460506	-0.383326	-3.53923	P16333
P16615	ATP2A2	Sarcoplasmic/endoplasmic reticulum calcium ATPase 2	30.2194	29.9114	29.8834	29.214	29.1084	28.8127	29.473	29.4119	29.5148	0.421533	0.0271261				+	+	FB-P_Ctrl;P-BF_Ctrl	27	27	27	29.2	29.2	29.2	114.76	0	305.73	15560000000	369	2.39798	0.00151904	-0.95973	-5.95153	2.06886	0.00225749	-0.538182	-4.81826	P16615;O14983;Q93084
P16949	STMN1	Stathmin	31.0556	30.9636	30.9532	30.9253	30.944	30.8725	30.2332	30.422	30.3664	-0.5734	0.000668266					+	P-BF_Ctrl	9	9	6	44.3	44.3	32.2	17.302	0	69.043	26398000000	413	0.922521	0.0407419	-0.0769151	-1.97465	3.25647	0	-0.650293	-10.037	P16949
P16989	YBX3	Y-box-binding protein 3	28.5984	28.5832	28.522	27.9152	27.9155	27.6992	27.7861	28.1518	27.8076	0.0718667	0.63162				+	+	FB-P_Ctrl;P-BF_Ctrl	14	8	8	50.5	39.5	39.5	40.089	0	181.95	4468900000	172	3.17568	0.000174545	-0.724585	-9.56551	2.24627	0.00144524	-0.652704	-5.40535	P16989
P17096	HMGA1	High mobility group protein HMG-I/HMG-Y	30.3814	30.0995	30.0497	28.3652	28.9468	28.6199	29.8572	29.027	29.1639	0.7054	0.0832806				+	+	FB-P_Ctrl;P-BF_Ctrl	5	5	5	41.1	41.1	41.1	11.676	0	64.097	12725000000	308	2.82849	0.000671141	-1.53293	-7.76272	1.39348	0.00796716	-0.827518	-2.98811	P17096
P17612	PRKACA	cAMP-dependent protein kinase catalytic subunit alpha	26.1521	26.1018	26.074	Not detected	Not detected	Not detected	25.6152	Not detected	25.6009	#DIV/0!	#DIV/0!					+	P-BF_Ctrl	4	4	2	13.4	13.4	8.3	40.589	0	6.3441	778750000	13	0	0.933698	Not detected	0	3.33104	0	-0.501321	-16.7101	P17612
P17812	CTPS1	CTP synthase 1	31.9374	31.9364	31.9016	30.0443	30.1441	30.2044	29.3647	29.5497	29.4423	-0.6787	0.000672884				+	+	FB-P_Ctrl;P-BF_Ctrl	17	17	15	32.8	32.8	28.4	66.69	0	323.31	43390000000	575	5.50885	0	-1.79421	-37.259	5.83789	0	-2.47289	-45.0458	P17812
P17844	DDX5	Probable ATP-dependent RNA helicase DDX5	32.1691	31.6475	31.6102	30.7976	30.8722	30.6683	31.6047	31.0961	31.4144	0.592367	0.0207398				+		FB-P_Ctrl	28	22	22	42.2	33.7	33.7	69.147	0	303.15	38891000000	799	2.25012	0.00169808	-1.02953	-5.41871	0.871064	0.0382872	-0.437195	-1.8717	P17844
P17858	PFKL	ATP-dependent 6-phosphofructokinase, liver type	29.2284	29.2251	29.0336	28.1265	28.0351	27.9668	27.9506	28.1787	28.0166	0.00583333	0.946736				+	+	FB-P_Ctrl;P-BF_Ctrl	20	20	16	30.3	30.3	24.4	85.018	0	140.56	7517900000	223	3.83592	0	-1.11954	-14.1229	3.54637	0	-1.11372	-11.9151	P17858
P17980	PSMC3	26S protease regulatory subunit 6A	28.1819	28.176	28.1585	27.4574	27.884	27.8631	27.9864	27.554	27.3589	-0.101733	0.683206				+	+	FB-P_Ctrl;P-BF_Ctrl	17	17	17	45.8	45.8	45.8	49.203	0	80.914	4080000000	146	1.46009	0.00912626	-0.437286	-3.14542	1.35773	0.00925335	-0.539029	-2.90538	P17980
P17987	TCP1	T-complex protein 1 subunit alpha	32.4858	32.4801	32.4692	32.0467	31.8701	31.7788	31.6574	31.6968	31.8304	-0.170333	0.145704				+	+	FB-P_Ctrl;P-BF_Ctrl	24	24	24	56.7	56.7	56.7	60.343	0	323.31	84678000000	850	2.74063	0.000753477	-0.579847	-7.35831	3.85379	0	-0.750163	-14.2713	P17987
P18031	PTPN1	Tyrosine-protein phosphatase non-receptor type 1	27.3278	27.2234	27.0966	25.4524	25.6577	25.6567	Not detected	25.7827	25.6967	0.150767	0.20627				+	+	FB-P_Ctrl;P-BF_Ctrl	9	9	9	26	26	26	49.966	0	101.7	1921200000	87	4.15617	0	-1.62702	-17.0255	3.27755	0	-1.47627	-16.0321	P18031
P18077	RPL35A	60S ribosomal protein L35a	30.8948	30.6631	30.6426	28.9929	29.0241	28.9231	29.0639	29.3986	29.2027	0.2417	0.0760278				+	+	FB-P_Ctrl;P-BF_Ctrl	6	6	6	29.1	29.1	29.1	12.538	0	27.376	17677000000	110	4.46253	0	-1.75348	-20.3437	3.55356	0	-1.51182	-11.9657	P18077
P18085	ARF4	ADP-ribosylation factor 4	27.6382	27.2639	27.2403	26.0013	26.7167	26.8788	26.7722	26.4029	26.4748	0.0177	0.954622					+	P-BF_Ctrl	9	5	5	56.7	27.8	27.8	20.511	0	18.167	1848100000	83	1.32903	0.0121327	-0.848555	-2.83977	2.07778	0.00209009	-0.830856	-4.84655	P18085
P18124	RPL7	60S ribosomal protein L7	32.3814	32.3455	32.2335	30.6195	30.8966	30.7472	30.893	30.9919	31.0324	0.218	0.0728921				+	+	FB-P_Ctrl;P-BF_Ctrl	16	16	16	45.2	45.2	45.2	29.225	0	202.6	59022000000	383	4.16221	0	-1.56572	-17.0855	4.61037	0	-1.34771	-22.1647	P18124
P18206	VCL	Vinculin	29.4083	29.274	29.2523	29.0726	28.9799	28.8982	27.4986	28.2829	28.3365	-0.944233	0.0265867				+	+	FB-P_Ctrl;P-BF_Ctrl	37	37	37	40.6	40.6	40.6	123.8	0	145.23	8391300000	278	2.02362	0.00260374	-0.327991	-4.67674	2.0062	0.00271147	-1.27219	-4.62309	P18206
P18615	NELFE	Negative elongation factor E	29.654	29.6251	29.5446	31.3573	31.2533	31.3223	30.849	30.9191	30.8551	-0.436567	0.000324184				+	+	FB-P_Ctrl;P-BF_Ctrl	17	17	17	49.5	49.5	49.5	43.239	0	323.31	12884000000	454	5.54447	0	1.70305	38.0325	5.24093	0	1.26652	31.9198	P18615
P18621	RPL17	60S ribosomal protein L17	32.2865	31.9646	31.9363	30.7613	31.0145	31.0727	31.8886	32.1592	32.093	1.09743	0.000944696				+		FB-P_Ctrl	8	8	8	37.5	37.5	37.5	21.397	0	107.66	49752000000	529	2.78212	0.000776042	-1.11302	-7.5469	0.0380146	1	-0.0155443	-0.112039	P18621
P18669	PGAM1	Phosphoglycerate mutase 1	31.0215	30.9752	30.7932	30.4497	30.7788	30.7601	29.9008	29.9342	30.0924	-0.687067	0.00488932					+	P-BF_Ctrl	12	12	12	52.8	52.8	52.8	28.804	0	323.31	25416000000	367	0.982391	0.0341073	-0.267115	-2.09587	3.32308	0	-0.954152	-10.442	P18669;P15259;Q8N0Y7
P18754	RCC1	Regulator of chromosome condensation	30.4037	30.2066	30.1937	29.5005	29.3114	29.3522	29.8522	30.3158	30.0483	0.684067	0.00943834				+		FB-P_Ctrl	13	13	13	37.3	37.3	37.3	44.969	0	161.58	13144000000	314	3.2317	0.000184971	-0.879968	-9.89018	0.579823	0.120951	-0.19589	-1.30102	P18754
P18887	XRCC1	DNA repair protein XRCC1	28.164	28.1303	28.0822	28.4745	28.601	28.7907	29.1611	29.1467	29.0429	0.494833	0.00753742				+	+	FB-P_Ctrl;P-BF_Ctrl	12	12	12	25.8	25.8	25.8	69.476	0	56.863	3977600000	101	2.19556	0.00184698	0.496603	5.23212	4.63289	0	0.991453	22.4559	P18887
P19338	NCL	Nucleolin	31.6153	31.2268	31.1945	30.5763	30.5518	30.5605	30.3376	30.5027	30.5389	-0.103133	0.173547				+	+	FB-P_Ctrl;P-BF_Ctrl	24	24	24	30.8	30.8	30.8	76.613	0	323.31	31622000000	629	2.35193	0.00147184	-0.782662	-5.78116	2.39932	0.000928387	-0.885818	-5.95652	P19338
P19387	POLR2C	DNA-directed RNA polymerase II subunit RPB3	26.0656	25.9791	25.9225	25.732	25.2223	25.3822	26.1013	25.4223	25.8032	0.3301	0.253185				+		FB-P_Ctrl	6	6	6	31.3	31.3	31.3	31.441	0	20.114	781150000	38	1.59644	0.00641449	-0.543594	-3.48114	0.458678	0.21592	-0.21347	-1.06276	P19387
P19525	EIF2AK2	Interferon-induced, double-stranded RNA-activated protein kinase	27.1098	27.1055	26.9047	25.4167	25.8148	25.8318	25.8299	25.9706	25.8312	0.189467	0.257019				+	+	FB-P_Ctrl;P-BF_Ctrl	10	10	10	23	23	23	62.094	0	32.835	1578100000	55	3.05936	0.000155089	-1.35225	-8.92276	3.8386	0	-1.16274	-14.145	P19525
P19784	CSNK2A2	Casein kinase II subunit alpha	28.4669	28.4656	28.4371	28.4236	28.3499	28.5009	28.3026	28.1488	28.1851	-0.212633	0.0288564					+	P-BF_Ctrl	17	17	17	57.7	57.7	57.7	41.213	0	103.31	4604000000	175	0.28701	0.562033	-0.0317542	-0.710895	2.17219	0.00183826	-0.244346	-5.15379	P19784
P20020	ATP2B1	Plasma membrane calcium-transporting ATPase 1	27.2439	27.0726	27.0591	Not detected	25.5602	26.8769	26.1091	26.409	26.1306	-0.00231667	0.996636					+	P-BF_Ctrl	12	12	7	13.4	13.4	8	134.68	0	43.981	2029900000	101	0.781393	0.06637	-0.906655	-1.8254	2.88091	0.000109589	-0.908957	-8.01339	P20020;Q16720
P20042	EIF2S2	Eukaryotic translation initiation factor 2 subunit 2	29.4203	29.2753	29.2129	27.7316	27.7246	27.6958	28.7782	28.3264	28.3987	0.783767	0.00506775				+	+	FB-P_Ctrl;P-BF_Ctrl	12	12	12	35.7	35.7	35.7	38.388	0	151.61	6950300000	176	4.84595	0	-1.58548	-25.4043	2.19812	0.00141915	-0.801767	-5.24078	P20042
P20248	CCNA2	Cyclin-A2	25.066	24.9763	24.8558	Not detected	26.0532	25.9235	25.8838	Not detected	25.8381	-0.1274	0.205085				+	+	FB-P_Ctrl;P-BF_Ctrl	4	4	4	16.4	16.4	16.4	48.55	0	10.953	355460000	24	2.80223	0.00078628	1.02232	11.0756	2.8076	0.000105495	0.894939	11.1222	P20248
P20290	BTF3	Transcription factor BTF3	28.8077	28.803	28.7581	27.2696	27.2247	27.6412	27.4574	26.9349	27.1179	-0.208433	0.360695				+	+	FB-P_Ctrl;P-BF_Ctrl	8	8	8	51.9	51.9	51.9	22.168	0	312.79	5522800000	123	3.35095	0.000211454	-1.41109	-10.616	3.33645	0	-1.61951	-10.5251	P20290
P20340	RAB6A	Ras-related protein Rab-6A;Ras-related protein Rab-6B	28.5598	28.5475	28.5074	28.6118	28.3891	28.4046	28.2356	28.1816	28.1627	-0.2752	0.0214395					+	P-BF_Ctrl	6	6	6	33.2	33.2	33.2	23.593	0	88.504	6619100000	144	0.401663	0.324011	-0.069725	-0.948497	3.66591	0	-0.34492	-12.7831	P20340;Q9NRW1;Q53S08;Q14964
P20585	MSH3	DNA mismatch repair protein Msh3	26.2241	26.2058	26.1867	26.702	26.5585	26.568	26.412	25.819	25.9216	-0.558633	0.0415717				+		FB-P_Ctrl	15	15	15	20.8	20.8	20.8	127.41	0	27.725	1086400000	44	2.977	0.000453858	0.40395	8.49194	0.350454	0.390804	-0.154685	-0.843943	P20585
P20618	PSMB1	Proteasome subunit beta type-1	25.5106	25.4677	25.4178	24.7353	25.0912	Not detected	26.533	Not detected	Not detected	1.61975	#DIV/0!				+		FB-P_Ctrl	4	4	4	19.5	19.5	19.5	26.489	0.00031133	4.6629	577400000	15	1.56038	0.00692857	-0.552065	-4.02707	0	0.966624	1.06764	0	P20618
P20700	LMNB1	Lamin-B1	32.3307	32.0936	32.0928	30.5394	30.4691	30.5315	31.4829	31.3689	31.3916	0.901133	2.61782e-05				+	+	FB-P_Ctrl;P-BF_Ctrl	42	42	39	62.8	62.8	59	66.408	0	323.31	49282000000	810	4.44806	0	-1.65908	-20.1736	3.02902	0	-0.757929	-8.76177	P20700
P20810	CAST	Calpastatin	29.8776	29.3951	29.3757	29.3091	29.6228	29.4694	29.0859	28.9523	28.7156	-0.549167	0.0176818					+	P-BF_Ctrl	16	16	16	37.1	37.1	37.1	76.572	0	175.62	11255000000	246	0.165525	0.823417	-0.0823695	-0.439372	1.48766	0.00646582	-0.631526	-3.21177	P20810
P21281	ATP6V1B2	V-type proton ATPase subunit B, brain isoform	27.6246	27.5679	27.4749	26.9949	27.0154	26.7923	26.3684	26.2093	25.7021	-0.840933	0.0168839				+	+	FB-P_Ctrl;P-BF_Ctrl	12	12	9	33.7	33.7	25.8	56.5	0	38.255	2318800000	86	2.75965	0.000765083	-0.621606	-7.44426	2.68544	0.000513238	-1.46254	-7.11393	P21281
P21283	ATP6V1C1	V-type proton ATPase subunit C 1	24.6812	24.5092	24.496	Not detected	23.3564	23.7414	23.0708	22.9405	Not detected	-0.54325	0.116079				+	+	FB-P_Ctrl;P-BF_Ctrl	3	3	3	9.9	9.9	9.9	43.941	0	6.2717	262850000	16	2.0773	0.00233862	-1.01328	-6.22201	3.36072	0	-1.5565	-17.0984	P21283
P21333	FLNA	Filamin-A	51.4207	51.4165	51.2708	50.7333	47.2083	50.5914	49.8902	50.2013	50.2241	0.5942	0.634648					+	P-BF_Ctrl	134	134	120	53.4	53.4	50.6	280.74	0	323.31	2.8606e+16	11967	0.739082	0.0779459	-1.85831	-1.61153	3.36012	0	-1.26413	-10.6738	P21333
P21675	TAF1	Transcription initiation factor TFIID subunit 1;Transcription initiation factor TFIID subunit 1-like	26.3245	26.2643	26.0718	27.8746	26.8345	27.1575	27.1532	26.7121	26.7188	-0.4275	0.277316				+	+	FB-P_Ctrl;P-BF_Ctrl	14	14	14	11	11	11	212.67	0	29.181	942590000	59	1.5541	0.0071826	1.06869	3.37481	1.75419	0.00413811	0.641192	3.89525	P21675;Q8IZX4
P21796	VDAC1	Voltage-dependent anion-selective channel protein 1	30.5596	30.2755	30.2676	29.8042	29.6446	29.6466	29.1743	29.3444	29.3414	-0.411767	0.00594045				+	+	FB-P_Ctrl;P-BF_Ctrl	13	13	13	58.7	58.7	58.7	30.772	0	99.509	16433000000	366	2.43813	0.00155647	-0.669154	-6.10345	3.20124	0	-1.08086	-9.71236	P21796
P22061	PCMT1	Protein-L-isoaspartate(D-aspartate) O-methyltransferase	30.9326	30.867	30.8358	30.1327	30.343	30.3738	29.8486	29.9963	29.8814	-0.3744	0.0131113				+	+	FB-P_Ctrl;P-BF_Ctrl	13	13	13	58.6	58.6	58.6	24.636	0	323.31	21055000000	271	2.74005	0.000752525	-0.595313	-7.3557	4.2771	0	-0.969702	-18.2665	P22061
P22087	FBL	rRNA 2-O-methyltransferase fibrillarin	30.7228	30.4834	30.392	29.7376	29.7732	29.4395	30.4357	30.4222	30.3934	0.767	0.00197251				+		FB-P_Ctrl	13	13	12	49.2	49.2	45.8	33.784	0	136.94	20607000000	445	2.43787	0.00155487	-0.88263	-6.10244	0.50951	0.166575	-0.115649	-1.16328	P22087
P22102	GART	Trifunctional purine biosynthetic protein adenosine-3;Phosphoribosylamine--glycine ligase;Phosphoribosylformylglycinamidine cyclo-ligase;Phosphoribosylglycinamide formyltransferase	31.3313	31.2639	31.2517	30.0194	30.2193	29.9668	29.6133	29.8362	29.7226	-0.344467	0.0264154				+	+	FB-P_Ctrl;P-BF_Ctrl	31	31	31	37	37	37	107.77	0	279.92	33006000000	651	3.94174	0	-1.21381	-15.0242	4.64388	0	-1.55827	-22.5994	P22102
P22234	PAICS	Multifunctional protein ADE2;Phosphoribosylaminoimidazole-succinocarboxamide synthase;Phosphoribosylaminoimidazole carboxylase	31.19	31.176	31.1204	30.62	30.7486	30.6021	29.8579	29.9098	29.7747	-0.809433	0.000182125				+	+	FB-P_Ctrl;P-BF_Ctrl	19	19	19	36.5	36.5	36.5	47.079	0	323.31	32739000000	681	3.24098	0.000186047	-0.505198	-9.94494	5.09791	0	-1.31465	-29.3887	P22234
P22314	UBA1	Ubiquitin-like modifier-activating enzyme 1	29.0762	29.0667	29.0143	29.5286	29.305	29.347	28.9926	29.0595	29.0793	-0.349733	0.00889782				+		FB-P_Ctrl	24	24	24	32.4	32.4	32.4	117.85	0	248.68	7080400000	305	2.05865	0.00232119	0.341156	4.78606	0.0937736	0.945574	-0.00854238	-0.262643	P22314
P22392	NME2	Nucleoside diphosphate kinase B;Putative nucleoside diphosphate kinase	28.2788	28.1358	28.1286	26.571	27.539	27.6823	27.0447	27.6777	27.3771	0.1024	0.807766					+	P-BF_Ctrl	10	6	6	67.8	42.8	42.8	17.298	0	13.789	3906200000	88	1.2224	0.0165824	-0.916978	-2.60196	1.89952	0.00297111	-0.814602	-4.30426	P22392;O60361
P22626	HNRNPA2B1	Heterogeneous nuclear ribonucleoproteins A2/B1	33.3159	33.2984	33.1542	31.6535	32.127	32.2237	32.899	32.6378	32.7356	0.756067	0.0169744				+	+	FB-P_Ctrl;P-BF_Ctrl	19	19	19	61.5	61.5	61.5	37.429	0	323.31	1276800000000000	1362	2.62136	0.00119861	-1.25482	-6.83916	2.25364	0.00136546	-0.498717	-5.43091	P22626
P22670	RFX1	MHC class II regulatory factor RFX1	27.3497	27.1005	27.088	27.9024	27.8359	27.7472	28.5048	27.9748	28.4182	0.470767	0.0505336				+	+	FB-P_Ctrl;P-BF_Ctrl	15	15	15	23.4	23.4	23.4	104.76	0	95.946	2035500000	73	2.59695	0.00118485	0.649111	6.73699	2.42528	0.000945518	1.11986	6.05445	P22670;P48378;P48380
P22681	CBL	E3 ubiquitin-protein ligase CBL	27.0747	26.846	26.7757	26.159	26.3641	26.5561	26.2364	25.5877	25.7637	-0.497133	0.0917535				+	+	FB-P_Ctrl;P-BF_Ctrl	12	12	12	18	18	18	99.632	0	39.642	1648700000	79	1.67901	0.00521289	-0.539085	-3.69425	2.07862	0.00209323	-1.03618	-4.84923	P22681;Q13191
P22695	UQCRC2	Cytochrome b-c1 complex subunit 2, mitochondrial	29.1933	29.1907	29.1718	27.8683	27.7859	27.8175	27.8252	27.7787	27.7679	-0.0333	0.325673				+	+	FB-P_Ctrl;P-BF_Ctrl	11	11	11	35.1	35.1	35.1	48.442	0	106.89	6475500000	265	6.17062	0	-1.36136	-54.5694	6.70016	0	-1.39465	-74.0364	P22695
P23193	TCEA1	Transcription elongation factor A protein 1	24.8983	24.746	24.6608	25.2132	24.9895	25.041	24.8237	24.6398	24.8675	-0.304233	0.0351458				+		FB-P_Ctrl	3	3	3	10.6	10.6	10.6	33.969	0	7.298	234960000	13	1.49367	0.00873171	0.312827	3.22634	0.029311	1	0.00857989	0.0871562	P23193
P23246	SFPQ	Splicing factor, proline- and glutamine-rich	34.2299	34.1769	34.1276	33.8272	34.0106	34.0738	34.541	34.5814	34.4733	0.561367	0.00221273					+	P-BF_Ctrl	31	31	30	45.4	45.4	44.3	76.149	0	323.31	2617400000000000	1860	1.22474	0.01643	-0.207581	-2.60708	2.91545	0.000111758	0.353792	8.18253	P23246
Q9NRH3	TUBG2	Tubulin gamma-2 chain;Tubulin gamma-1 chain	26.9384	26.5737	26.4505	25.2723	24.9025	25.0793	Not detected	25.0413	25.1808	0.02635	0.869458				+	+	FB-P_Ctrl;P-BF_Ctrl	5	5	5	18.8	18.8	18.8	51.091	0	17.876	990520000	58	3.00922	0.000466563	-1.56951	-8.65814	2.36881	0.00102041	-1.54317	-7.86794	Q9NRH3;P23258
P23284	PPIB	Peptidyl-prolyl cis-trans isomerase B	32.3952	31.6088	31.5649	30.0682	30.2266	30.275	30.7725	31.058	31.0425	0.767733	0.00235262				+	+	FB-P_Ctrl;P-BF_Ctrl	13	13	13	51.4	51.4	51.4	23.742	0	212.92	28293000000	415	2.41567	0.00153286	-1.66637	-6.01808	1.46218	0.00689168	-0.898626	-3.15043	P23284
P23381	WARS	Tryptophan--tRNA ligase, cytoplasmic;T1-TrpRS;T2-TrpRS	30.8797	30.6864	30.6547	30.4271	30.8366	31.0599	29.942	29.8297	29.558	-0.997967	0.0101269					+	P-BF_Ctrl	23	23	23	58.4	58.4	58.4	53.165	0	323.31	25493000000	469	0.0599467	0.980658	0.034282	0.172976	2.70422	0.000294301	-0.963697	-7.1963	P23381
P23396	RPS3	40S ribosomal protein S3	32.8749	32.7848	32.7695	32.32	32.1206	32.0751	31.6278	31.7086	31.6823	-0.499	0.00319539				+	+	FB-P_Ctrl;P-BF_Ctrl	19	19	19	65.8	65.8	65.8	26.688	0	323.31	86079000000	1111	2.83052	0.000672948	-0.637817	-7.7723	5.01494	0	-1.13684	-28.0126	P23396
P23526	AHCY	Adenosylhomocysteinase	27.3535	27.084	27.0802	25.2431	25.3303	25.2898	25.4811	Not detected	25.3987	0.152167	0.0424054				+	+	FB-P_Ctrl;P-BF_Ctrl	7	7	7	17.8	17.8	17.8	47.716	0	27.372	1718900000	56	4.43911	0	-1.88481	-20.069	3.13434	0	-1.73264	-14.3468	P23526
P23528	CFL1	Cofilin-1	30.6574	30.4289	30.2618	29.4794	29.2983	29.2273	29.1872	29.4886	29.3855	0.0187667	0.879316				+	+	FB-P_Ctrl;P-BF_Ctrl	9	9	5	51.2	51.2	32.5	18.502	0	113.47	17394000000	273	2.90539	0.000564029	-1.11438	-8.13296	2.7864	0.000205016	-1.09559	-7.56659	P23528
P23588	EIF4B	Eukaryotic translation initiation factor 4B	32.6518	32.5929	32.51	31.4941	31.7025	31.7003	30.6301	30.9483	30.39	-0.976167	0.00515188				+	+	FB-P_Ctrl;P-BF_Ctrl	26	26	26	42.1	42.1	42.1	69.15	0	323.31	78323000000	697	3.53673	0	-0.952588	-11.8476	3.49501	0	-1.92877	-11.5598	P23588
P24390	KDELR1	ER lumen protein-retaining receptor 1	27.6369	27.5673	27.299	25.6404	26.3259	26.0883	25.419	24.7911	25.1749	-0.889867	0.0306162				+	+	FB-P_Ctrl;P-BF_Ctrl	2	2	1	14.2	14.2	9	24.542	0	57.724	2165800000	89	2.55552	0.00114922	-1.48288	-6.5665	3.45805	0	-2.37277	-11.3103	P24390
P24534	EEF1B2	Elongation factor 1-beta	28.9357	28.8039	28.7195	27.3673	27.0452	Not detected	27.0387	26.7046	27.0596	-0.27195	0.24955				+	+	FB-P_Ctrl;P-BF_Ctrl	5	5	5	27.6	27.6	27.6	24.763	0	91.611	5021200000	80	2.80892	0.000661376	-1.61348	-11.1337	3.86718	0	-1.8854	-14.3836	P24534
P24752	ACAT1	Acetyl-CoA acetyltransferase, mitochondrial	28.1046	27.9825	27.9089	26.7787	27.0089	27.1546	27.04	27.3627	27.3056	0.255367	0.159198				+	+	FB-P_Ctrl;P-BF_Ctrl	11	11	11	30.4	30.4	30.4	45.199	0	79.468	2862800000	102	2.92866	0.000438596	-1.01793	-8.24808	2.57646	0.000657116	-0.762588	-6.6522	P24752
P24928	POLR2A	DNA-directed RNA polymerase II subunit RPB1	27.8397	27.2781	27.0791	28.1582	28.033	28.2236	27.8984	27.6521	28.1206	-0.2479	0.165656				+		FB-P_Ctrl	18	18	18	12.1	12.1	12.1	217.17	0	46.674	3040900000	46	1.4631	0.00914358	0.739309	3.15262	0.862736	0.0399092	0.49143	1.85513	P24928
P24941	CDK2	Cyclin-dependent kinase 2	29.1165	28.8791	28.6935	29.4382	29.3241	29.316	29.1934	29.2148	29.1605	-0.169867	0.016167				+		FB-P_Ctrl	17	15	15	66.1	59.7	59.7	33.929	0	122.83	6648600000	179	1.64307	0.00545979	0.463069	3.60053	1.11706	0.017358	0.293196	2.37538	P24941;Q00526
P25054	APC	Adenomatous polyposis coli protein	25.1713	25.1441	25.1329	Not detected	24.5163	24.5731	Not detected	Not detected	Not detected	#DIV/0!	#DIV/0!				+		FB-P_Ctrl	9	9	9	5.1	5.1	5.1	311.64	0	19.07	452920000	20	3.77128	0	-0.604714	-23.4769	0	0.955338	Not detected	0	P25054
P25098	ADRBK1	Beta-adrenergic receptor kinase 1	26.9694	26.6929	26.4526	25.8419	26.23	25.9919	25.1561	24.9334	25.6853	-0.763	0.0379446				+	+	FB-P_Ctrl;P-BF_Ctrl	11	11	11	19	19	19	79.573	0	27.296	1287000000	44	1.66256	0.00524704	-0.68368	-3.65117	2.24207	0.00143949	-1.44667	-5.39083	P25098;P35626
P25205	MCM3	DNA replication licensing factor MCM3	29.5962	29.3495	29.3355	28.7835	28.9298	28.7097	29.0901	29.1482	29.1411	0.3188	0.00901727				+	+	FB-P_Ctrl;P-BF_Ctrl	28	28	28	44.9	44.9	44.9	90.98	0	237.61	9279700000	304	2.36112	0.00147758	-0.619385	-5.81485	1.59256	0.00481852	-0.300604	-3.47132	P25205
P25398	RPS12	40S ribosomal protein S12	30.3475	29.9532	29.883	28.343	26.8945	26.72	27.7284	28.1933	28.3555	0.773233	0.230822				+	+	FB-P_Ctrl;P-BF_Ctrl	3	3	3	30.3	30.3	30.3	14.515	0	134.54	11528000000	110	2.16559	0.00216216	-2.7421	-5.13184	2.9399	0.000113475	-1.96887	-8.3042	P25398
P25440	BRD2	Bromodomain-containing protein 2	27.9027	27.828	27.8132	27.1591	26.8699	27.2817	27.4037	27.2709	27.572	0.311967	0.106009				+	+	FB-P_Ctrl;P-BF_Ctrl	17	15	15	29.6	27.8	27.8	88.06	0	61.72	2559500000	91	2.3965	0.00151449	-0.744421	-5.94598	2.04076	0.00246771	-0.432467	-4.73	P25440
P25685	DNAJB1	DnaJ homolog subfamily B member 1	30.6551	30.5038	30.4769	30.8111	30.8474	30.7086	30.4975	30.7124	30.6336	-0.174533	0.0812709				+		FB-P_Ctrl	16	16	16	47.4	47.4	47.4	38.044	0	132.51	19661000000	421	1.61017	0.00597972	0.243748	3.51604	0.341884	0.410665	0.0691973	0.826223	P25685
P25705	ATP5A1	ATP synthase subunit alpha, mitochondrial	32.4715	32.4416	32.4051	31.6606	31.5098	31.3018	31.3896	31.5652	31.3974	-0.04	0.753152				+	+	FB-P_Ctrl;P-BF_Ctrl	27	27	27	55.2	55.2	55.2	59.75	0	323.31	75272000000	1187	3.06776	0.000156098	-0.948696	-8.96777	4.08843	0	-0.988679	-16.3667	P25705
P25789	PSMA4	Proteasome subunit alpha type-4	26.7857	26.6377	26.4608	26.9457	26.1182	25.2184	25.9738	26.0245	26.28	-0.00133333	0.99803					+	P-BF_Ctrl	7	7	7	23.4	23.4	23.4	29.483	0	12.689	1262700000	35	0.453303	0.252254	-0.533959	-1.05207	1.79706	0.00387568	-0.535337	-4.01302	P25789
P26038	MSN	Moesin	27.1107	26.9291	26.92	25.8697	26.0023	25.8737	26.0026	26.1951	26.3276	0.259867	0.0667142				+	+	FB-P_Ctrl;P-BF_Ctrl	19	8	8	31.4	14.9	14.9	67.819	0	24.191	1327000000	42	3.83629	0	-1.07136	-14.1259	2.70148	0.000293086	-0.811459	-7.1842	P26038
P26358	DNMT1	DNA (cytosine-5)-methyltransferase 1	30.2886	30.1738	30.1323	29.919	29.8234	29.9731	30.3283	30.289	30.2633	0.388367	0.00123539				+		FB-P_Ctrl	38	38	38	26.9	26.9	26.9	183.16	0	323.31	16428000000	531	1.99143	0.00265283	-0.293086	-4.57794	0.880465	0.0368613	0.0952848	1.89043	P26358
P26373	RPL13	60S ribosomal protein L13	32.9779	32.5652	32.5315	31.8069	31.9446	31.8209	32.3544	32.6003	32.4658	0.616033	0.00179717				+		FB-P_Ctrl	8	8	8	38.9	38.9	38.9	24.261	0	252.82	80263000000	342	2.29041	0.0015428	-0.834072	-5.55989	0.610976	0.107198	-0.21807	-1.36177	P26373
P26583	HMGB2	High mobility group protein B2	30.333	30.0646	29.8584	33.2027	33.248	33.3432	31.9543	31.769	31.9338	-1.37893	4.3296e-05				+	+	FB-P_Ctrl;P-BF_Ctrl	12	11	11	24.9	20.6	20.6	24.033	0	323.31	27401000000	279	4.60955	0	3.17931	22.1543	3.56565	0	1.80039	12.0512	P26583
P26599	PTBP1	Polypyrimidine tract-binding protein 1	31.7105	31.4243	31.3647	30.8199	30.9821	30.7432	30.9618	31.3619	31.4224	0.4003	0.0674751				+		FB-P_Ctrl	18	18	18	55.4	55.4	55.4	57.221	0	323.31	38531000000	636	2.15435	0.00225065	-0.651465	-5.0946	0.629633	0.0994213	-0.251167	-1.39812	P26599;O95758
P26639	TARS	Threonine--tRNA ligase, cytoplasmic	29.909	29.8243	29.7313	28.6599	28.7304	28.7553	27.7688	27.8002	28.2564	-0.7734	0.00846237				+	+	FB-P_Ctrl;P-BF_Ctrl	25	25	25	34.9	34.9	34.9	83.434	0	189.04	11099000000	295	4.3298	0	-1.10633	-18.8347	3.46285	0	-1.87973	-11.3425	P26639;A2RTX5
P26640	VARS	Valine--tRNA ligase	30.0803	30.0697	30.0566	29.1881	28.8777	29.0329	28.9858	29.0243	28.8886	-0.0666667	0.534781				+	+	FB-P_Ctrl;P-BF_Ctrl	31	31	31	31.9	31.9	31.9	140.47	0	323.31	15040000000	474	3.49036	0	-1.03597	-11.5281	4.94587	0	-1.10264	-26.9158	P26640
P26641	EEF1G	Elongation factor 1-gamma	30.979	30.8547	30.84	29.6218	29.6298	29.7941	28.8138	29.772	29.6428	-0.272367	0.42288				+	+	FB-P_Ctrl;P-BF_Ctrl	16	16	16	44.6	44.6	44.6	50.118	0	255.48	23436000000	440	4.14733	0	-1.20932	-16.938	2.08933	0.00210431	-1.48166	-4.88337	P26641
P27348	YWHAQ	14-3-3 protein theta	28.4911	28.4201	28.374	26.6088	26.1116	26.6428	25.4217	25.8528	26.0167	-0.690667	0.0489434				+	+	FB-P_Ctrl;P-BF_Ctrl	8	5	5	37.6	26.5	26.5	27.764	0	140.47	3336800000	78	3.45342	0	-1.974	-11.2795	3.91003	0	-2.66468	-14.7484	P27348
P27448	MARK3	MAP/microtubule affinity-regulating kinase 3	27.5904	27.5315	27.5307	26.3154	26.5555	26.2173	26.0716	25.9704	26.2934	-0.250933	0.144306				+	+	FB-P_Ctrl;P-BF_Ctrl	10	10	7	20.2	20.2	16.5	84.428	0	39.632	2507200000	51	3.5015	0	-1.18808	-11.6042	3.91254	0	-1.43903	-14.7701	P27448;Q96L34
P27635	RPL10	60S ribosomal protein L10	31.8498	31.665	31.3022	29.53	29.9148	30.067	30.4119	30.4881	30.3969	0.595033	0.0214479				+	+	FB-P_Ctrl;P-BF_Ctrl	7	7	7	25.2	25.2	25.2	24.604	0	40.966	33807000000	275	2.83624	0.000677507	-1.76838	-7.79934	2.70181	0.000293692	-1.17337	-7.18568	P27635;Q96L21
P27694	RPA1	Replication protein A 70 kDa DNA-binding subunit;Replication protein A 70 kDa DNA-binding subunit, N-terminally processed	28.9976	28.9392	28.9023	29.8445	30.2382	30.0212	30.1524	30.1439	30.2057	0.1327	0.314549				+	+	FB-P_Ctrl;P-BF_Ctrl	18	18	18	36.4	36.4	36.4	68.137	0	217.71	8282600000	307	3.1263	0.000165232	1.08823	9.28757	5.45493	0	1.22097	36.1174	P27694
P27695	APEX1	DNA-(apurinic or apyrimidinic site) lyase;DNA-(apurinic or apyrimidinic site) lyase, mitochondrial	31.6585	31.0159	30.9198	29.7683	29.6785	29.8025	30.5315	30.6238	30.7652	0.8904	0.000325432				+		FB-P_Ctrl	14	14	14	37.7	37.7	37.7	35.554	0	323.31	19407000000	306	2.45493	0.00157588	-1.44829	-6.16797	1.08545	0.0194889	-0.557883	-2.30882	P27695
P27708	CAD	CAD protein;Glutamine-dependent carbamoyl-phosphate synthase;Aspartate carbamoyltransferase;Dihydroorotase	28.6819	28.645	28.5572	28.0177	27.5438	27.6833	27.8198	27.7894	27.877	0.0804667	0.603514				+	+	FB-P_Ctrl;P-BF_Ctrl	33	33	33	20.1	20.1	20.1	242.98	0	123.46	5185200000	219	2.42453	0.00153753	-0.879768	-6.05162	4.22839	0	-0.799343	-17.7563	P27708
P27816	MAP4	Microtubule-associated protein 4	32.5247	32.5245	32.5135	31.8078	31.5558	31.6099	31.3664	31.2853	31.238	-0.361267	0.0133014				+	+	FB-P_Ctrl;P-BF_Ctrl	43	43	43	46.4	46.4	46.4	121	0	323.31	82198000000	1411	3.44991	0.000237624	-0.863066	-11.256	5.27228	0	-1.22433	-32.503	P27816
P27824	CANX	Calnexin	28.9385	28.5625	28.5337	27.6274	27.2594	26.5973	27.396	27.4041	26.9033	0.0731	0.842051				+	+	FB-P_Ctrl;P-BF_Ctrl	13	13	13	23.8	23.8	23.8	67.567	0	61.983	4389900000	165	2.00495	0.00257649	-1.51682	-4.61924	2.62394	0.00067122	-1.44373	-6.85005	P27824
P28074	PSMB5	Proteasome subunit beta type-5	26.0736	26.0691	25.8236	Not detected	25.6958	Not detected	Not detected	25.1806	25.0772	-0.5669	#DIV/0!					+	P-BF_Ctrl	5	5	5	20.2	20.2	20.2	28.48	0	11.015	657850000	12	0	0.987449	-0.292955	0	2.323	0.00107107	-0.859883	-7.58545	P28074
P28288	ABCD3	ATP-binding cassette sub-family D member 3	29.4184	29.3151	29.2573	27.8081	27.8566	27.898	29.0271	28.6796	28.8847	1.00957	0.000633926				+	+	FB-P_Ctrl;P-BF_Ctrl	21	21	21	36.7	36.7	36.7	75.475	0	154.78	9119000000	269	4.97898	0	-1.47605	-27.4362	1.85986	0.00347405	-0.466466	-4.18984	P28288
P28340	POLD1	DNA polymerase delta catalytic subunit	26.132	26.1239	26.1077	26.8453	26.8374	27.0394	27.3795	26.9785	27.3077	0.314533	0.0879912				+	+	FB-P_Ctrl;P-BF_Ctrl	17	17	17	21.2	21.2	21.2	123.63	0	38.376	1251400000	95	3.53469	0	0.786126	11.8334	3.05517	0	1.10068	8.90034	P28340
P28370	SMARCA1	Probable global transcription activator SNF2L1	27.4479	27.4046	27.3933	26.8816	26.1142	26.0992	27.0568	27.1649	27.1147	0.747133	0.0454142				+	+	FB-P_Ctrl;P-BF_Ctrl	25	12	12	23.7	13.8	13.8	122.6	0	59.133	2021100000	51	1.81296	0.00334364	-1.05029	-4.05729	2.99187	0	-0.303144	-8.5683	P28370
P28715	ERCC5	DNA repair protein complementing XP-G cells	24.373	24.3681	24.047	24.6788	25.139	25.1315	Not detected	Not detected	Not detected	#DIV/0!	#DIV/0!				+		FB-P_Ctrl	4	4	4	5.8	5.8	5.8	133.11	0	10.112	178210000	12	1.74224	0.00423833	0.720382	3.86283	0	0.952549	Not detected	0	P28715
P29084	GTF2E2	Transcription initiation factor IIE subunit beta	30.6165	30.4903	30.3377	29.8544	29.8917	30.2927	29.9724	29.9014	29.7128	-0.150733	0.400188					+	P-BF_Ctrl	16	16	16	49.1	49.1	49.1	33.043	0	288.19	13423000000	275	1.35338	0.011674	-0.468533	-2.89539	2.28462	0.00138436	-0.619282	-5.53939	P29084
P29218	IMPA1	Inositol monophosphatase 1	25.8187	25.8085	25.76	Not detected	25.5932	25.6878	Not detected	Not detected	Not detected	#DIV/0!	#DIV/0!				+		FB-P_Ctrl	5	5	5	20.9	20.9	20.9	30.188	0	14.482	569160000	19	1.45611	0.00918107	-0.155208	-3.6706	0	0.953245	Not detected	0	P29218
P29317	EPHA2	Ephrin type-A receptor 2	27.7749	27.5496	27.4241	24.8375	24.6532	24.7764	25.4983	25.018	25.3899	0.546367	0.0244465				+	+	FB-P_Ctrl;P-BF_Ctrl	9	9	9	13.3	13.3	13.3	108.27	0	30.378	1966100000	101	4.77335	0	-2.82715	-24.3589	3.66985	0	-2.28078	-12.8128	P29317
P29353	SHC1	SHC-transforming protein 1	25.7561	25.6612	25.6222	26.1645	25.6258	25.6522	25.0953	24.624	25.1029	-0.873433	0.0208963					+	P-BF_Ctrl	7	7	7	21.8	21.8	21.8	62.821	0	22.894	759560000	58	0.304177	0.520672	0.134353	0.747353	1.97424	0.00283974	-0.73907	-4.52582	P29353;P98077
P29372	MPG	DNA-3-methyladenine glycosylase	28.7696	28.5002	28.1826	27.6111	27.7537	27.4786	28.0315	28.1334	28.1359	0.4858	0.00495218				+		FB-P_Ctrl	8	8	8	34.2	34.2	34.2	32.868	0	112.03	3705600000	117	2.01261	0.00259319	-0.869659	-4.64279	1.04174	0.0219465	-0.383865	-2.21779	P29372
P29401	TKT	Transketolase	28.1913	28.1744	27.9461	29.2693	29.2169	29.2126	28.3793	28.8048	28.9235	-0.5304	0.0331809				+	+	FB-P_Ctrl;P-BF_Ctrl	16	16	16	36.9	36.9	36.9	67.877	0	99.863	4750000000	214	3.81078	0	1.12898	13.9166	1.51091	0.00601463	0.598575	3.2683	P29401
P29590	PML	Protein PML	27.8108	27.5578	27.5144	28.3571	28.1998	28.2982	27.8296	27.802	27.9025	-0.440333	0.00130269				+		FB-P_Ctrl	13	13	13	19	19	19	97.55	0	118.07	2872800000	82	2.50645	0.00121514	0.657379	6.36944	1.04916	0.0212947	0.217028	2.23316	P29590
P29692	EEF1D	Elongation factor 1-delta	29.2256	29.1411	29.0136	28.1468	27.9525	27.8315	27.5447	27.6151	27.8351	-0.311967	0.0696965				+	+	FB-P_Ctrl;P-BF_Ctrl	9	9	9	41.3	41.3	41.3	31.121	0	146.31	6858900000	181	3.31596	0.000201681	-1.1498	-10.398	3.77941	0	-1.46176	-13.6632	P29692
P30041	PRDX6	Peroxiredoxin-6	30.7045	30.6869	30.5812	30.287	30.3513	30.2711	29.7727	29.7516	29.901	-0.4947	0.000719079				+	+	FB-P_Ctrl;P-BF_Ctrl	15	15	15	68.8	68.8	68.8	25.035	0	277.51	21388000000	483	2.82828	0.000670241	-0.354389	-7.76177	3.82505	0	-0.84911	-14.0333	P30041
P30048	PRDX3	Thioredoxin-dependent peroxide reductase, mitochondrial	26.2458	26.175	26.1156	24.1028	24.3774	24.2025	Not detected	Not detected	Not detected	#DIV/0!	#DIV/0!				+		FB-P_Ctrl	3	3	3	13.3	13.3	13.3	27.692	0	21.042	786570000	40	4.59843	0	-1.95127	-22.0119	0	0.953947	Not detected	0	P30048
P30050	RPL12	60S ribosomal protein L12	29.7584	29.2936	29.2931	28.1758	28.4646	28.4007	28.7121	28.7601	28.5399	0.323667	0.0424899				+	+	FB-P_Ctrl;P-BF_Ctrl	3	3	3	24.2	24.2	24.2	17.818	0	76.18	7544700000	180	2.45965	0.00157752	-1.10131	-6.18618	2.00092	0.00270949	-0.777673	-4.60691	P30050
P30085	CMPK1	UMP-CMP kinase	26.6048	26.5751	26.5337	24.3605	24.885	25.0178	24.7989	24.9821	24.8999	0.1392	0.539138				+	+	FB-P_Ctrl;P-BF_Ctrl	6	6	6	34.7	34.7	34.7	22.222	0	11.007	899360000	60	3.07489	0.000157377	-1.81678	-9.0062	5.10503	0	-1.67761	-29.5097	P30085
P30086	PEBP1	Phosphatidylethanolamine-binding protein 1;Hippocampal cholinergic neurostimulating peptide	28.9263	28.3098	28.2017	27.1134	27.4432	27.532	27.6927	27.5421	27.5568	0.234333	0.160133				+	+	FB-P_Ctrl;P-BF_Ctrl	7	7	7	61.5	61.5	61.5	21.057	0	99.739	2565600000	76	1.9009	0.00284621	-1.11638	-4.30826	1.72757	0.0041054	-0.882066	-3.82328	P30086
P30101	PDIA3	Protein disulfide-isomerase A3	28.819	28.6715	28.5676	26.9926	27.2347	26.386	26.9594	27.5263	27.0858	0.3194	0.354594				+	+	FB-P_Ctrl;P-BF_Ctrl	15	15	15	35.2	35.2	35.2	56.782	0	53.215	4270000000	150	2.63756	0.00121127	-1.81494	-6.90775	2.88052	0.000109339	-1.49555	-8.01151	P30101
P30153	PPP2R1A	Serine/threonine-protein phosphatase 2A 65 kDa regulatory subunit A alpha isoform	29.461	29.3868	29.3488	28.5213	28.4833	28.7191	28.4638	28.5006	28.5098	-0.0831667	0.326431				+	+	FB-P_Ctrl;P-BF_Ctrl	15	15	15	36.5	36.5	36.5	65.308	0	97.037	8843900000	233	3.2966	0.000198758	-0.824276	-10.2792	4.84092	0	-0.907452	-25.3304	P30153;P30154
P30260	CDC27	Cell division cycle protein 27 homolog	27.0469	26.9999	26.9322	27.333	27.2419	27.0912	27.3129	27.1353	27.2404	0.0075	0.935698					+	P-BF_Ctrl	13	13	13	21.7	21.7	21.7	91.866	0	38.02	2039400000	91	1.37207	0.0112073	0.229024	2.93844	1.73903	0.00411082	0.23648	3.85416	P30260
P30419	NMT1	Glycylpeptide N-tetradecanoyltransferase 1	29.9582	29.8536	29.8426	28.513	28.5865	28.5735	28.4179	28.4969	28.2996	-0.152867	0.0682169				+	+	FB-P_Ctrl;P-BF_Ctrl	16	16	16	40.5	40.5	40.5	56.806	0	212.15	11229000000	284	5.17264	0	-1.32712	-30.6854	4.57483	0	-1.47999	-21.7128	P30419;O60551
P30566	ADSL	Adenylosuccinate lyase	26.6169	26.5795	26.5652	26.0353	26.0922	26.2822	26.226	26.2128	26.0859	0.0383333	0.682217				+	+	FB-P_Ctrl;P-BF_Ctrl	8	8	8	23.1	23.1	23.1	54.889	0	49.23	1468100000	53	2.38774	0.00150397	-0.450632	-5.91329	3.02214	0	-0.412301	-8.72567	P30566
P31153	MAT2A	S-adenosylmethionine synthase isoform type-2	29.265	29.2035	29.1388	26.8328	26.7538	26.8816	26.863	26.4856	27.058	-0.0205333	0.910775				+	+	FB-P_Ctrl;P-BF_Ctrl	13	13	13	32.9	32.9	32.9	43.66	0	59.164	5075900000	146	5.86218	0	-2.37972	-45.681	3.81632	0	-2.40025	-13.9618	P31153;Q00266
P31350	RRM2	Ribonucleoside-diphosphate reductase subunit M2	28.0139	28.01	27.9685	27.5839	27.4651	27.4943	27.0014	26.8257	26.9974	-0.572933	0.00108978				+	+	FB-P_Ctrl;P-BF_Ctrl	11	11	9	33.7	33.7	27.5	44.877	0	57.941	3194700000	127	3.63038	0	-0.482995	-12.519	4.22075	0	-1.05595	-17.6776	P31350
P31689	DNAJA1	DnaJ homolog subfamily A member 1	29.2476	29.2387	29.2283	28.6069	28.6483	28.5986	28.913	28.9531	28.79	0.267433	0.00651168				+	+	FB-P_Ctrl;P-BF_Ctrl	13	13	13	43.3	43.3	43.3	44.868	0	80.577	7579900000	175	5.54031	0	-0.620265	-37.9413	2.69216	0.000516923	-0.352857	-7.14332	P31689
P31942	HNRNPH3	Heterogeneous nuclear ribonucleoprotein H3	27.4637	27.3259	26.9942	25.8597	25.8545	26.0922	26.3615	26.4936	26.3842	0.477633	0.00567009				+	+	FB-P_Ctrl;P-BF_Ctrl	6	6	6	20.2	20.2	20.2	36.926	0	105.37	1577900000	61	2.93775	0.000441176	-1.32582	-8.29346	2.36862	0.00101954	-0.848172	-5.84244	P31942
P31943	HNRNPH1	Heterogeneous nuclear ribonucleoprotein H;Heterogeneous nuclear ribonucleoprotein H, N-terminally processed	31.4746	31.3717	31.1964	30.2395	30.2856	30.282	30.5528	30.7985	30.7087	0.417633	0.00468627				+	+	FB-P_Ctrl;P-BF_Ctrl	12	12	8	38.5	38.5	25.2	49.229	0	323.31	32293000000	424	3.70349	0	-1.07856	-13.0683	2.43663	0.00095137	-0.66087	-6.0977	P31943
P31946	YWHAB	14-3-3 protein beta/alpha;14-3-3 protein beta/alpha, N-terminally processed	28.2748	28.1785	28.168	Not detected	27.3748	27.1367	Not detected	26.2179	26.0593	-1.11715	0.0160025				+	+	FB-P_Ctrl;P-BF_Ctrl	8	5	5	41.5	30.5	30.5	28.082	0	116.56	3191500000	81	2.62112	0.00119722	-0.951302	-9.60805	4.00409	0	-2.06851	-28.0885	P31946
P31948	STIP1	Stress-induced-phosphoprotein 1	28.4488	28.4329	28.4049	27.5811	27.6948	27.816	27.6672	27.3653	27.3829	-0.2255	0.131098				+	+	FB-P_Ctrl;P-BF_Ctrl	15	15	15	29.1	29.1	29.1	62.639	0	41.893	4378400000	119	3.34784	0.000210066	-0.731506	-10.5964	3.19913	0	-0.957074	-9.70017	P31948
P31949	S100A11	Protein S100-A11;Protein S100-A11, N-terminally processed	29.2632	29.1905	29.0887	26.1307	27.3955	27.3552	27.1635	27.4359	27.3593	0.3591	0.443634				+	+	FB-P_Ctrl;P-BF_Ctrl	5	5	5	41.9	41.9	41.9	11.74	0	74.792	5026900000	68	2.21854	0.00166906	-2.22036	-5.31006	4.38664	0	-1.86127	-19.4669	P31949
P32119	PRDX2	Peroxiredoxin-2	30.8871	30.7664	30.7244	28.7271	29.6384	29.5308	29.3591	29.4583	29.4014	0.1075	0.728736				+	+	FB-P_Ctrl;P-BF_Ctrl	9	8	8	37.4	31.8	31.8	21.892	0	49.282	18737000000	244	2.16272	0.00215465	-1.49386	-5.12231	4.78299	0	-1.38638	-24.4953	P32119
P32121	ARRB2	Beta-arrestin-2	26.2389	26.2252	26.0994	25.4512	25.7388	25.4123	25.2869	25.1249	25.5736	-0.205633	0.285065				+	+	FB-P_Ctrl;P-BF_Ctrl	6	6	6	22.2	22.2	22.2	46.105	0	12.984	834980000	20	2.36542	0.00148192	-0.653742	-5.83066	2.46471	0.000788479	-0.859376	-6.20577	P32121
P32189	GK	Glycerol kinase;Putative glycerol kinase 3	26.9256	26.8813	26.838	Not detected	25.9383	25.6951	26.9976	25.6845	25.7915	0.341167	0.57965				+		FB-P_Ctrl	10	10	8	17.7	17.7	14.1	61.244	0	22.792	1512300000	62	2.79997	0.000785244	-1.06492	-11.056	0.792437	0.0514202	-0.723786	-1.71616	P32189;Q14409
P32969	RPL9	60S ribosomal protein L9	30.8346	30.8259	30.7629	30.1123	30.0401	29.7477	28.7491	29.5629	29.5569	-0.677067	0.0815024				+	+	FB-P_Ctrl;P-BF_Ctrl	9	9	9	56.8	56.8	56.8	21.863	0	153.47	20906000000	416	2.74862	0.000760204	-0.841075	-7.39429	2.30109	0.00130813	-1.51819	-5.59779	P32969
P33176	KIF5B	Kinesin-1 heavy chain	30.9277	30.6079	30.5681	30.3227	30.1454	30.3062	29.6779	29.8222	29.7715	-0.5009	0.00208414				+	+	FB-P_Ctrl;P-BF_Ctrl	42	42	34	49.9	49.9	41.4	109.68	0	323.31	23163000000	612	1.59868	0.00643174	-0.44313	-3.48682	2.83127	0.000106904	-0.944036	-7.77585	P33176
P33240	CSTF2	Cleavage stimulation factor subunit 2	26.4782	26.3299	26.2876	27.8781	27.7218	27.6019	27.2654	27.5707	27.3609	-0.334933	0.049862				+	+	FB-P_Ctrl;P-BF_Ctrl	13	8	8	37.6	24.4	24.4	60.959	0	18.961	1262900000	44	3.80528	0	1.36868	13.8718	3.19098	0	1.03375	9.6532	P33240
P33316	DUT	Deoxyuridine 5-triphosphate nucleotidohydrolase, mitochondrial	29.2374	29.2234	29.1325	28.6588	29.5175	29.4675	29.0712	28.9961	28.9753	-0.2004	0.513434					+	P-BF_Ctrl	5	5	5	29.8	29.8	29.8	26.563	0	227.32	7795800000	180	0.020026	1	0.0168489	0.0601314	1.85638	0.00346925	-0.183567	-4.1799	P33316
P33981	TTK	Dual specificity protein kinase TTK	27.8093	27.7349	27.6734	28.2124	28.1643	28.1659	27.9883	28.0857	28.1672	-0.100467	0.136671				+	+	FB-P_Ctrl;P-BF_Ctrl	21	21	21	35.1	35.1	35.1	97.071	0	65.51	3015900000	144	3.32143	0.00020296	0.441674	10.4318	2.20227	0.00142138	0.341232	5.2548	P33981
P33993	MCM7	DNA replication licensing factor MCM7	30.113	29.9596	29.9538	29.3769	29.2036	29.333	29.222	29.3849	29.3008	-0.00193333	0.979327				+	+	FB-P_Ctrl;P-BF_Ctrl	29	29	29	48.5	48.5	48.5	81.307	0	280.7	13275000000	456	3.17538	0.000173913	-0.704304	-9.56378	3.26023	0	-0.70622	-10.0595	P33993
P34896	SHMT1	Serine hydroxymethyltransferase, cytosolic	26.4888	26.4202	26.3016	25.119	25.0928	25.8286	Not detected	25.4015	Not detected	0.0547	#DIV/0!				+		FB-P_Ctrl	8	7	7	22.4	19.5	19.5	53.082	0	21.938	772300000	24	1.8896	0.00292542	-1.05672	-4.27544	0	0.956372	-1.00204	0	P34896
P34932	HSPA4	Heat shock 70 kDa protein 4	27.5244	27.4981	27.3791	28.1667	27.976	28.0477	27.568	27.3781	27.6833	-0.520333	0.0077114				+		FB-P_Ctrl	18	17	17	29.3	28.2	28.2	94.33	0	90.851	2680100000	133	2.95026	0.000443131	0.596266	8.35623	0.311382	0.488621	0.0759398	0.762546	P34932
P35221	CTNNA1	Catenin alpha-1	25.5869	25.4838	25.2215	24.8298	24.8516	24.629	24.7269	24.4387	24.6481	-0.165567	0.211481				+	+	FB-P_Ctrl;P-BF_Ctrl	8	8	5	10.6	10.6	7	100.07	0	44.647	540430000	41	2.15282	0.00224483	-0.660576	-5.08957	2.40007	0.000929991	-0.826159	-5.95936	P35221
P35232	PHB	Prohibitin	31.128	30.9171	30.8996	29.8301	29.851	29.8684	29.9396	30.0473	29.8378	0.0917333	0.210017				+	+	FB-P_Ctrl;P-BF_Ctrl	15	15	15	71.7	71.7	71.7	29.804	0	287.1	24519000000	384	3.96675	0	-1.13175	-15.2453	3.40097	0	-1.04005	-10.9351	P35232
P35241	RDX	Radixin	30.7989	30.6379	30.4989	29.106	29.1039	29.7081	29.3027	29.4381	29.2076	0.0101333	0.964148				+	+	FB-P_Ctrl;P-BF_Ctrl	29	29	17	45.5	45.5	27.8	68.563	0	135.35	20377000000	364	2.4415	0.00156289	-1.33919	-6.11633	3.57799	0	-1.32907	-12.1391	P35241
P35244	RPA3	Replication protein A 14 kDa subunit	27.0131	27.0019	26.992	27.7662	27.8019	28.1459	28.4365	27.9692	27.958	0.216567	0.337181				+	+	FB-P_Ctrl;P-BF_Ctrl	5	5	5	43	43	43	13.569	0	14.197	1861600000	65	2.75994	0.000766067	0.902358	7.44557	2.68038	0.000511156	1.1189	7.09189	P35244
P35251	RFC1	Replication factor C subunit 1	26.4925	26.4306	26.2378	25.5721	25.7828	25.3894	26.0908	25.8376	25.8578	0.3473	0.0677852				+	+	FB-P_Ctrl;P-BF_Ctrl	9	9	9	10.2	10.2	10.2	128.25	0	24.095	910020000	46	2.37733	0.00148919	-0.805538	-5.87463	1.82892	0.00366301	-0.458266	-4.10207	P35251
P35268	RPL22	60S ribosomal protein L22	30.8825	30.6453	30.6219	30.6944	30.1685	30.0704	30.2068	30.3879	30.2374	-0.0337333	0.875263					+	P-BF_Ctrl	4	4	4	21.1	21.1	21.1	14.787	0	20.994	22017000000	142	0.896812	0.0440525	-0.405481	-1.92309	1.92485	0.00292822	-0.439205	-4.37847	P35268
P35269	GTF2F1	General transcription factor IIF subunit 1	29.4257	29.4011	29.2781	30.3699	30.035	30.2579	30.191	29.9496	30.2112	-0.103667	0.468013				+	+	FB-P_Ctrl;P-BF_Ctrl	18	18	18	31.3	31.3	31.3	58.24	0	323.31	8901500000	346	2.84855	0.000534789	0.852668	7.85781	2.84336	0.000107623	0.748984	7.83312	P35269
P35520	CBS	Cystathionine beta-synthase	28.9203	28.7436	28.7025	27.3295	27.3788	27.272	27.2376	27.3731	27.229	-0.0468667	0.449338				+	+	FB-P_Ctrl;P-BF_Ctrl	11	11	11	22.1	22.1	22.1	60.586	0	79.898	5384000000	138	4.42114	0	-1.462	-19.8608	4.30006	0	-1.50887	-18.512	P35520
P35579	MYH9	Myosin-9	29.9276	29.6321	29.2135	27.4569	27.3834	27.6487	26.8274	26.56	26.6516	-0.816667	0.00184267				+	+	FB-P_Ctrl;P-BF_Ctrl	38	38	32	25.8	25.8	21.7	226.53	0	301.71	6453900000	289	3.15463	0.000170819	-2.09475	-9.44611	3.71314	0	-2.91143	-13.1425	P35579;REV__Q9UKV3
P35606	COPB2	Coatomer subunit beta	26.8636	26.717	26.6877	25.632	25.5065	25.6076	25.4596	Not detected	25.6695	-0.0174833	0.86233				+	+	FB-P_Ctrl;P-BF_Ctrl	10	10	10	14.9	14.9	14.9	102.49	0	17.466	1114400000	37	4.21557	0	-1.17402	-17.6244	2.83135	0.000107023	-1.19153	-11.3307	P35606
P35611	ADD1	Alpha-adducin	29.1912	29.1905	29.1715	28.6604	28.4396	28.4387	28.3533	28.2767	28.2759	-0.210933	0.0540285				+	+	FB-P_Ctrl;P-BF_Ctrl	17	17	16	31.2	31.2	30.1	80.954	0	127.21	8948200000	252	3.08621	0.000158678	-0.671504	-9.06746	5.31627	0	-0.882475	-33.3392	P35611
P35613	BSG	Basigin	27.8132	27.3933	27.3076	26.9692	26.5257	26.2231	27.1192	26.3849	27.1005	0.295533	0.414083				+		FB-P_Ctrl	6	6	6	21.6	21.6	21.6	42.2	0	19.396	2472100000	79	1.59981	0.00643607	-0.932067	-3.48969	1.03877	0.0222082	-0.636532	-2.21164	P35613
P35637	FUS	RNA-binding protein FUS	31.0778	30.9462	30.9207	31.259	30.9123	31.0095	31.4102	31.7594	31.9161	0.634967	0.0250226					+	P-BF_Ctrl	11	11	9	20.2	20.2	20.2	53.425	0	323.31	31022000000	451	0.27693	0.586116	0.0786781	0.689312	1.9787	0.00277415	0.71369	4.53932	P35637
P35658	NUP214	Nuclear pore complex protein Nup214	30.4616	30.3275	30.2679	30.3961	30.2588	30.3503	29.9905	29.7342	29.7303	-0.516733	0.00556283					+	P-BF_Ctrl	43	43	43	31	31	31	213.62	0	323.31	19562000000	543	0.0875206	0.946052	-0.0172685	-0.246423	2.17519	0.00184256	-0.533993	-5.1638	P35658
P35998	PSMC2	26S protease regulatory subunit 7	29.4819	29.474	29.4431	28.5177	28.5683	28.6542	28.1105	28.0847	27.9926	-0.517467	0.000641685				+	+	FB-P_Ctrl;P-BF_Ctrl	22	22	22	54.3	54.3	54.3	48.633	0	231.88	9187900000	241	4.54367	0	-0.886264	-21.3241	5.50806	0	-1.40372	-37.2418	P35998
P36404	ARL2	ADP-ribosylation factor-like protein 2	26.6487	26.6481	26.616	26.7053	26.626	26.3352	25.9878	26.1708	26.2896	-0.4061	0.046587					+	P-BF_Ctrl	8	8	8	54.9	54.9	54.9	20.878	0	32.499	1607600000	49	0.294238	0.544555	-0.0820834	-0.726291	2.27912	0.00137875	-0.488225	-5.52001	P36404
P36405	ARL3	ADP-ribosylation factor-like protein 3	27.3613	27.3154	27.1305	26.7378	26.8361	26.8591	26.1031	Not detected	Not detected	-0.7079	#DIV/0!				+		FB-P_Ctrl	5	5	5	44.5	44.5	44.5	20.455	0	27.068	1595800000	62	2.3415	0.00146332	-0.458081	-5.74316	0	0.978518	-1.16594	0	P36405
P36542	ATP5C1	ATP synthase subunit gamma, mitochondrial	29.7791	29.7238	29.7085	28.3733	29.1925	29.1104	28.6628	28.9967	28.8339	-0.0609333	0.837081				+	+	FB-P_Ctrl;P-BF_Ctrl	9	9	9	37.9	37.9	37.9	32.996	0	65.485	12227000000	218	1.49669	0.00863876	-0.845081	-3.23365	3.10601	0	-0.906018	-9.17555	P36542
P36543	ATP6V1E1	V-type proton ATPase subunit E 1	25.8601	25.6405	25.5662	25.3361	25.1581	25.4257	24.751	24.7797	Not detected	-0.541283	0.0130956				+	+	FB-P_Ctrl;P-BF_Ctrl	6	6	6	27.4	27.4	27.4	26.145	0	18.16	604300000	25	1.49678	0.00864433	-0.382285	-3.23389	2.40087	0.000930796	-0.923556	-8.07143	P36543;Q96A05
P36578	RPL4	60S ribosomal protein L4	33.6277	33.1862	32.8966	31.6394	31.9667	31.844	32.7713	32.7232	32.7483	0.9309	0.000645101				+		FB-P_Ctrl	20	20	20	34	34	34	47.697	0	286.18	1133600000000000	1048	2.436	0.00155328	-1.42014	-6.09531	1.07979	0.0196112	-0.489236	-2.29696	P36578
P36873	PPP1CC	Serine/threonine-protein phosphatase PP1-gamma catalytic subunit	29.4457	29.4214	29.2795	30.374	29.8192	29.7144	30.0363	30.2964	29.9484	0.1245	0.616704					+	P-BF_Ctrl	11	3	3	32.2	7.4	7.4	36.983	0	148.85	10916000000	121	1.30297	0.0128669	0.587037	2.78081	2.43748	0.000952212	0.711512	6.10096	P36873
P37108	SRP14	Signal recognition particle 14 kDa protein	30.2307	29.337	29.2194	27.7292	28.5442	28.5753	28.3847	29.0646	29.21	0.603533	0.18379				+		FB-P_Ctrl	7	7	7	38.2	38.2	38.2	14.57	0	119.85	6949200000	64	1.44345	0.00941206	-1.31281	-3.10573	0.803252	0.0498789	-0.709271	-1.73745	P37108
P37198	NUP62	Nuclear pore glycoprotein p62	28.8132	28.8114	28.7127	28.3405	28.2611	28.1521	27.4775	27.5938	27.7428	-0.646533	0.00236173				+	+	FB-P_Ctrl;P-BF_Ctrl	10	10	10	23.4	23.4	23.4	53.254	0	88.752	5851000000	175	2.93103	0.000439239	-0.527869	-8.25988	3.82539	0	-1.17439	-14.0361	P37198
P37802	TAGLN2	Transgelin-2	34.1675	34.1094	33.9796	33.8717	34.3391	34.1932	33.0414	33.5147	33.4752	-0.7909	0.0181939					+	P-BF_Ctrl	14	14	13	65.3	65.3	58.3	22.391	0	323.31	2150700000000000	1221	0.120518	0.894632	0.0491702	0.330408	1.99664	0.00270751	-0.741769	-4.59383	P37802
P37840	SNCA	Alpha-synuclein	28.7846	28.7377	28.7335	28.965	29.2089	29.2605	28.5636	28.2115	28.3165	-0.780933	0.00487604				+	+	FB-P_Ctrl;P-BF_Ctrl	7	7	6	45	45	38.6	14.46	0	199.79	6119700000	145	1.8785	0.00299848	0.392853	4.24335	1.67101	0.00436129	-0.388066	-3.67327	P37840
P38117	ETFB	Electron transfer flavoprotein subunit beta	26.5915	26.4372	26.36	Not detected	25.916	25.6941	Not detected	Not detected	Not detected	#DIV/0!	#DIV/0!				+		FB-P_Ctrl	4	4	4	15.7	15.7	15.7	27.843	0	8.6383	1055400000	24	1.91648	0.00278555	-0.657813	-5.45218	0	0.977061	Not detected	0	P38117
P38159	RBMX	RNA-binding motif protein, X chromosome;RNA-binding motif protein, X chromosome, N-terminally processed;RNA binding motif protein, X-linked-like-1	31.661	31.5725	31.5223	28.653	29.3745	29.1626	30.1725	29.9538	29.8701	0.935433	0.0157775				+	+	FB-P_Ctrl;P-BF_Ctrl	14	14	14	35.5	35.5	35.5	42.331	0	264.83	26598000000	389	3.49704	0	-2.52189	-11.5737	4.05491	0	-1.5865	-16.0501	P38159;Q96E39;O75526;Q8N7X1
P38398	BRCA1	Breast cancer type 1 susceptibility protein	25.7249	25.7222	25.6904	26.6684	26.3554	26.9967	26.8099	26.6744	26.5064	-0.00993333	0.963659				+	+	FB-P_Ctrl;P-BF_Ctrl	14	14	14	11.6	11.6	11.6	207.72	0	42.116	581060000	29	2.18036	0.00210211	0.961006	5.18108	3.37213	0	0.95109	10.75	P38398
P38432	COIL	Coilin	26.9542	26.9278	26.5706	26.0459	26.1173	26.2893	26.5105	26.1435	26.3411	0.180867	0.231466				+	+	FB-P_Ctrl;P-BF_Ctrl	7	7	7	15.5	15.5	15.5	62.608	0	67.677	987830000	46	2.01622	0.0025953	-0.666689	-4.6539	1.39063	0.00801639	-0.485837	-2.98149	P38432
P38606	ATP6V1A	V-type proton ATPase catalytic subunit A	28.9404	28.9028	28.8489	27.9462	28.1189	28.1555	27.4841	27.573	27.5405	-0.541	0.00147418				+	+	FB-P_Ctrl;P-BF_Ctrl	19	19	19	35.2	35.2	35.2	68.303	0	161.19	7025700000	271	3.53056	0	-0.823807	-11.8047	5.48551	0	-1.36485	-36.7604	P38606
P38646	HSPA9	Stress-70 protein, mitochondrial	30.9885	30.9858	30.9828	30.82	30.7044	30.8081	30.9941	30.7983	30.9711	0.143667	0.116266				+		FB-P_Ctrl	31	31	31	53	53	53	73.68	0	323.31	27819000000	725	2.32015	0.00144795	-0.208251	-5.66596	0.449636	0.22485	-0.0645752	-1.04476	P38646
P38919	EIF4A3	Eukaryotic initiation factor 4A-III;Eukaryotic initiation factor 4A-III, N-terminally processed	29.9474	29.6362	29.6052	28.4663	28.311	28.4406	28.7406	28.8198	28.7897	0.3774	0.00210209				+	+	FB-P_Ctrl;P-BF_Ctrl	20	17	17	49.1	43.1	43.1	46.871	0	97.749	12050000000	232	3.42472	0.000233577	-1.32366	-11.0898	2.97335	0.000115802	-0.946259	-8.47331	P38919
P39019	RPS19	40S ribosomal protein S19	27.8415	27.7772	27.4922	25.4899	25.7336	25.6327	26.4799	26.6909	26.3553	0.889967	0.00180834				+	+	FB-P_Ctrl;P-BF_Ctrl	4	4	4	26.2	26.2	26.2	16.06	0	13.53	1824600000	48	4.07301	0	-2.08489	-16.2203	2.92384	0.000112544	-1.19496	-8.22409	P39019
P39023	RPL3	60S ribosomal protein L3	31.8033	31.5567	31.5288	30.4531	30.8429	30.7262	30.4471	30.5711	30.4539	-0.183367	0.208218				+	+	FB-P_Ctrl;P-BF_Ctrl	14	14	14	35.2	35.2	35.2	46.108	0	137.49	38137000000	444	2.56415	0.00115436	-0.955537	-6.60172	3.53802	0	-1.13893	-11.8566	P39023
P39656	DDOST	Dolichyl-diphosphooligosaccharide--protein glycosyltransferase 48 kDa subunit	28.256	27.8664	27.7876	26.0585	26.6185	26.5122	26.1209	26.921	27.0943	0.315667	0.412568				+	+	FB-P_Ctrl;P-BF_Ctrl	13	13	13	44.3	44.3	44.3	50.8	0	69.043	2891100000	110	2.66056	0.00122565	-1.5736	-7.00613	1.71085	0.00407587	-1.25791	-3.77853	P39656
P39880	CUX1	Homeobox protein cut-like 1	26.3315	26.0989	25.7924	28.1526	27.554	27.2934	26.7388	26.8753	26.9743	-0.803867	0.0379364				+	+	FB-P_Ctrl;P-BF_Ctrl	20	20	9	17.9	17.9	7.8	164.19	0	68.873	966960000	50	2.22615	0.00167812	1.59243	5.33611	2.00794	0.00271345	0.788539	4.62844	P39880
P40222	TXLNA	Alpha-taxilin	29.1219	29.036	28.8965	29.6128	29.5608	29.2069	30.166	29.9716	30.0409	0.599333	0.0127236					+	P-BF_Ctrl	18	18	18	36.6	36.6	36.6	61.89	0	323.31	7272600000	211	1.43334	0.0100138	0.442043	3.08176	3.55592	0	1.04137	11.9824	P40222
P40227	CCT6A	T-complex protein 1 subunit zeta	31.0225	31.0178	30.9891	30.5489	30.3085	30.2226	30.1752	30.2066	30.1277	-0.190167	0.130867				+	+	FB-P_Ctrl;P-BF_Ctrl	23	23	18	48.4	48.4	39.4	58.024	0	261.17	27733000000	497	2.56811	0.00116347	-0.649822	-6.6179	5.31455	0	-0.839951	-33.3061	P40227
P40429	RPL13A	60S ribosomal protein L13a	32.2208	32.2145	32.1551	30.597	30.2867	30.2886	30.5949	30.888	30.7245	0.345033	0.0610449				+	+	FB-P_Ctrl;P-BF_Ctrl	9	9	9	36	36	36	23.577	0	44.674	51321000000	345	4.1701	0	-1.80606	-17.1642	4.12595	0	-1.46098	-16.7285	P40429;Q6NVV1
P40616	ARL1	ADP-ribosylation factor-like protein 1	27.6773	27.6369	27.3783	26.4734	26.8838	26.8459	26.6481	26.9052	26.7265	0.0255667	0.874127				+	+	FB-P_Ctrl;P-BF_Ctrl	6	6	6	49.7	49.7	49.7	20.417	0	22.76	2387600000	93	2.17243	0.00217735	-0.829834	-5.15459	2.57969	0.000657744	-0.804253	-6.6655	P40616
P40692	MLH1	DNA mismatch repair protein Mlh1	27.7091	27.6544	27.6172	28.7844	28.9312	29.408	29.0064	28.8602	28.8743	-0.127567	0.54655				+	+	FB-P_Ctrl;P-BF_Ctrl	23	23	23	43.7	43.7	43.7	84.6	0	246.3	3451100000	146	2.71968	0.000741294	1.38097	7.26471	4.70105	0	1.2534	23.3603	P40692
P40763	STAT3	Signal transducer and activator of transcription 3	29.265	29.1733	29.1494	29.5032	29.2726	29.3288	28.8886	28.5999	28.9209	-0.565067	0.0101956					+	P-BF_Ctrl	27	27	27	45.6	45.6	45.6	88.067	0	253.85	8557000000	385	1.03955	0.0281982	0.172302	2.21325	1.6574	0.00434168	-0.392786	-3.63771	P40763
P40818	USP8	Ubiquitin carboxyl-terminal hydrolase 8	27.1955	26.9527	26.831	26.2476	26.3981	26.3651	26.4263	26.5469	26.6655	0.2093	0.0647947				+	+	FB-P_Ctrl;P-BF_Ctrl	12	12	12	16.5	16.5	16.5	127.52	0	21.631	1612500000	65	2.31082	0.00144381	-0.656144	-5.63252	1.60604	0.00470573	-0.446838	-3.50554	P40818
P40926	MDH2	Malate dehydrogenase, mitochondrial	31.3436	29.8975	29.7423	28.1358	28.5177	28.4503	29.441	29.7626	29.7645	1.2881	0.00127432				+		FB-P_Ctrl	10	10	10	39.9	39.9	39.9	35.503	0	76.159	8408900000	239	1.69841	0.00475035	-1.95987	-3.74547	0.573735	0.124217	-0.671735	-1.28914	P40926
P41091	EIF2S3	Eukaryotic translation initiation factor 2 subunit 3;Putative eukaryotic translation initiation factor 2 subunit 3-like protein	30.3567	30.345	30.3002	29.8348	29.6759	29.5949	29.8311	29.7776	29.785	0.0960333	0.255474				+	+	FB-P_Ctrl;P-BF_Ctrl	14	14	14	37.7	37.7	37.7	51.109	0	323.31	18499000000	314	3.01987	0.000470958	-0.632041	-8.71373	4.62324	0	-0.536039	-22.3307	P41091;Q2VIR3
P41214	EIF2D	Eukaryotic translation initiation factor 2D	25.8524	25.2612	25.2245	24.1181	24.9135	24.3073	24.2196	24.1465	24.1585	-0.271433	0.322983				+	+	FB-P_Ctrl;P-BF_Ctrl	5	5	5	13.5	13.5	13.5	64.706	0	10.149	468710000	22	1.47376	0.00892112	-0.999762	-3.17823	2.46553	0.000789189	-1.27116	-6.20898	P41214
P41227	NAA10	N-alpha-acetyltransferase 10	28.1432	27.9055	27.9044	27.0774	26.8661	27.126	26.9898	26.4204	26.2916	-0.4559	0.117185				+	+	FB-P_Ctrl;P-BF_Ctrl	10	10	10	49.4	49.4	49.4	26.458	0	28.462	3275700000	81	2.98591	0.000460829	-0.961148	-8.53761	2.46202	0.000787062	-1.41708	-6.19536	P41227;Q9BSU3
P41236	PPP1R2	Protein phosphatase inhibitor 2;Protein phosphatase inhibitor 2-like protein 3	28.4942	28.4746	28.4581	28.4038	28.6379	28.3925	27.8318	28.0323	27.9282	-0.5473	0.00518032					+	P-BF_Ctrl	7	7	7	36.6	36.6	36.6	23.015	0	76.45	5013700000	82	0.00985102	1	0.0024128	0.0299089	3.12221	0	-0.544893	-9.26492	P41236;Q6NXS1
P41240	CSK	Tyrosine-protein kinase CSK	26.5978	26.5576	26.3503	25.4941	25.6008	25.5586	24.7515	25.649	25.2807	-0.3241	0.284229				+	+	FB-P_Ctrl;P-BF_Ctrl	9	9	9	23.1	23.1	23.1	50.704	0	22.175	1101100000	68	3.48528	0	-0.950744	-11.4936	2.02954	0.00252476	-1.27484	-4.69508	P41240;P42679
P41250	GARS	Glycine--tRNA ligase	27.539	27.4453	27.4188	25.631	25.6912	Not detected	Not detected	26.4499	25.0259	0.0768	0.924016				+	+	FB-P_Ctrl;P-BF_Ctrl	9	9	9	17.9	17.9	17.9	83.165	0	219.81	2043100000	79	4.27688	0	-1.80662	-34.6483	1.32232	0.0097977	-1.72982	-3.2467	P41250
P41252	IARS	Isoleucine--tRNA ligase, cytoplasmic	29.7162	29.6851	29.5861	28.7118	28.4665	28.37	28.5856	28.3469	28.7448	0.043	0.793934				+	+	FB-P_Ctrl;P-BF_Ctrl	31	31	31	31.4	31.4	31.4	144.5	0	152.57	10372000000	379	3.33452	0.000206452	-1.14636	-10.5131	3.08034	0	-1.10335	-9.03563	P41252
P42167	TMPO	Lamina-associated polypeptide 2, isoforms beta/gamma;Thymopoietin;Thymopentin	32.0793	31.9609	31.7391	29.2907	29.1405	29.1254	29.8994	30.0221	29.9167	0.760533	0.000309255				+	+	FB-P_Ctrl;P-BF_Ctrl	21	8	8	53.1	23.3	23.3	50.67	0	323.31	32634000000	582	4.76917	0	-2.74088	-24.3001	4.30272	0	-1.98038	-18.5406	P42167
P42224	STAT1	Signal transducer and activator of transcription 1-alpha/beta	28.9595	28.9021	28.8844	29.2685	29.3707	29.4254	28.8244	28.6109	28.5277	-0.700533	0.00215389				+	+	FB-P_Ctrl;P-BF_Ctrl	25	25	25	44.4	44.4	44.4	87.334	0	161.6	8271700000	288	2.99385	0.000463679	0.439538	8.57854	1.33819	0.00948148	-0.26099	-2.86063	P42224
P42285	SKIV2L2	Superkiller viralicidic activity 2-like 2	29.3812	29.3481	29.3192	29.2361	29.3934	29.3494	29.9932	29.7706	29.8066	0.5305	0.00313032					+	P-BF_Ctrl	33	33	33	36.7	36.7	36.7	117.8	0	165.15	8078400000	318	0.175393	0.80509	-0.0232029	-0.462534	2.68608	0.000514811	0.507292	7.11674	P42285
P42356	PI4KA	Phosphatidylinositol 4-kinase alpha	25.9358	25.6942	25.6916	Not detected	Not detected	Not detected	Not detected	24.9128	24.5865	#DIV/0!	#DIV/0!					+	P-BF_Ctrl	6	6	6	4.3	4.3	4.3	236.83	0	9.5885	794170000	8	0	0.998808	Not detected	0	2.10934	0.00205183	-1.02419	-6.38629	P42356
P42566	EPS15	Epidermal growth factor receptor substrate 15	28.9515	28.8335	28.8117	28.395	28.108	28.0748	27.57	26.2399	27.0153	-1.25087	0.0349879				+	+	FB-P_Ctrl;P-BF_Ctrl	24	24	24	40.7	40.7	40.7	98.655	0	167.59	5710200000	209	2.43399	0.0015501	-0.672972	-6.08761	2.11201	0.00205339	-1.92383	-4.95626	P42566
P42677	RPS27	40S ribosomal protein S27	30.853	30.6895	30.673	30.8891	30.6304	30.5727	30.1022	30.1766	30.0907	-0.574233	0.00471562					+	P-BF_Ctrl	5	5	3	32.1	32.1	15.5	9.461	0	63.34	23850000000	252	0.133919	0.874293	-0.0410614	-0.363468	3.19889	0	-0.615294	-9.69879	P42677
P42694	HELZ	Probable helicase with zinc finger domain	25.3611	25.2877	25.2767	Not detected	24.6126	Not detected	24.6364	24.3786	24.7477	-0.0250333	#DIV/0!					+	P-BF_Ctrl	8	8	8	6.9	6.9	6.9	218.97	0	21.612	400040000	19	0	0.999173	-0.695869	0	2.51659	0.000721251	-0.720905	-6.40972	P42694
P42696	RBM34	RNA-binding protein 34	28.77	28.7266	28.5806	26.5835	26.3975	26.8887	27.2389	27.7438	27.3277	0.813567	0.0183471				+	+	FB-P_Ctrl;P-BF_Ctrl	13	13	13	38.1	38.1	38.1	48.564	0	132.17	3248400000	81	3.7485	0	-2.06919	-13.4179	2.78734	0.000104803	-1.25563	-7.57091	P42696
P42704	LRPPRC	Leucine-rich PPR motif-containing protein, mitochondrial	27.1167	26.7677	26.6816	25.0209	25.4274	Not detected	25.4059	Not detected	Not detected	0.18175	#DIV/0!				+		FB-P_Ctrl	15	15	15	11.8	11.8	11.8	157.9	0	24.437	1141600000	41	2.24448	0.00169343	-1.63122	-7.12284	0	0.982945	-1.44947	0	P42704
P42766	RPL35	60S ribosomal protein L35	32.9903	32.7212	32.5046	30.2752	30.9999	31.003	31.7291	31.9911	31.8332	1.09177	0.012626				+	+	FB-P_Ctrl;P-BF_Ctrl	6	6	6	33.3	33.3	33.3	14.551	0	146.34	60313000000	277	2.67565	0.000962696	-1.97932	-7.07135	2.28862	0.00138776	-0.887553	-5.55352	P42766
P42771	CDKN2A	Cyclin-dependent kinase inhibitor 2A	25.7129	25.5524	25.3845	24.4087	24.4437	24.6101	24.1352	24.3731	24.3214	-0.210933	0.0912413				+	+	FB-P_Ctrl;P-BF_Ctrl	3	3	3	26.3	26.3	26.3	16.532	0	10.113	511740000	31	3.14144	0.000169014	-1.06245	-9.37199	3.36164	0	-1.27336	-10.6834	P42771;P42772
P43243	MATR3	Matrin-3	30.7294	30.6855	30.5344	29.9679	29.9232	29.8755	30.2616	30.0005	30.114	0.203167	0.0643483				+	+	FB-P_Ctrl;P-BF_Ctrl	24	24	24	31.8	31.8	31.8	94.622	0	323.31	21907000000	334	3.44526	0.000235872	-0.727553	-11.2252	2.26382	0.00136986	-0.52442	-5.46639	P43243
P43487	RANBP1	Ran-specific GTPase-activating protein	30.5661	30.4924	30.4222	29.6133	29.5825	29.6383	28.8231	28.7269	28.9714	-0.7709	0.000453003				+	+	FB-P_Ctrl;P-BF_Ctrl	6	6	6	37.8	37.8	37.8	23.31	0	144.23	17085000000	208	4.41523	0	-0.882208	-19.7928	4.43924	0	-1.65309	-20.0706	P43487;Q9C010
P43490	NAMPT	Nicotinamide phosphoribosyltransferase	28.7598	28.7454	28.7256	26.8785	27.5931	26.3694	27.4847	27.5258	27.121	0.430167	0.318094				+	+	FB-P_Ctrl;P-BF_Ctrl	17	17	17	44	44	44	55.52	0	66.895	4992900000	170	2.1439	0.00224096	-1.7966	-5.0602	3.34696	0	-1.36641	-10.5909	P43490
P43686	PSMC4	26S protease regulatory subunit 6B	29.955	29.748	29.7333	28.4326	28.4168	28.7594	27.9613	28.2353	28.067	-0.4484	0.0308642				+	+	FB-P_Ctrl;P-BF_Ctrl	17	17	17	52.6	52.6	52.6	47.366	0	123.33	9847600000	197	3.18523	0.000175824	-1.27584	-9.62015	4.05855	0	-1.72425	-16.0841	P43686
P45880	VDAC2	Voltage-dependent anion-selective channel protein 2	31.3515	31.2801	31.2372	31.3064	30.9347	30.8729	30.7007	30.5794	30.6831	-0.3836	0.0525032					+	P-BF_Ctrl	8	8	8	32.3	32.3	32.3	31.566	0	186.31	33201000000	431	0.837115	0.0543214	-0.251588	-1.80431	3.64061	0	-0.63518	-12.5945	P45880
P45973	CBX5	Chromobox protein homolog 5	27.6181	27.4857	27.4056	Not detected	26.7213	25.9886	26.4328	26.2438	25.9914	-0.132283	0.706309				+	+	FB-P_Ctrl;P-BF_Ctrl	5	5	5	31.4	31.4	31.4	22.225	0	7.2424	1865400000	32	1.56269	0.00693316	-1.1482	-4.03523	3.0761	0	-1.2805	-9.01271	P45973
P45974	USP5	Ubiquitin carboxyl-terminal hydrolase 5	26.8608	26.8098	26.7419	Not detected	25.5806	25.9898	26.2672	26.2849	25.633	0.2765	0.446021				+	+	FB-P_Ctrl;P-BF_Ctrl	12	12	12	22	22	22	95.785	0	45.724	1217500000	46	2.11497	0.00237829	-1.01897	-6.41553	1.57178	0.00497203	-0.742484	-3.41897	P45974
P45984	MAPK9	Mitogen-activated protein kinase 9	26.5793	26.456	26.3024	26.063	25.9371	26.1776	25.8058	25.9274	Not detected	-0.192633	0.151017				+	+	FB-P_Ctrl;P-BF_Ctrl	9	9	9	26.2	26.2	26.2	48.139	0	34.294	1111700000	47	1.6612	0.00522885	-0.386685	-3.64762	1.84373	0.00354759	-0.579314	-5.13176	P45984;P53779;P45983
P46013	MKI67	Antigen KI-67	33.5347	33.4889	33.4343	32.097	31.9899	32.0582	32.9945	32.6037	32.6652	0.7061	0.00487936				+	+	FB-P_Ctrl;P-BF_Ctrl	132	132	132	49.8	49.8	49.8	358.69	0	323.31	1474800000000000	2581	5.33316	0	-1.43759	-33.6659	2.37436	0.00102477	-0.731483	-5.86363	P46013
P46020	PHKA1	Phosphorylase b kinase regulatory subunit alpha, skeletal muscle isoform	26.8641	26.7352	26.6752	26.0347	26.0668	25.9626	25.5479	25.2539	25.2103	-0.684	0.00345098				+	+	FB-P_Ctrl;P-BF_Ctrl	9	9	9	8.8	8.8	8.8	137.31	0	17.916	1447100000	48	3.49674	0	-0.736815	-11.5716	3.53896	0	-1.42078	-11.8633	P46020
P46060	RANGAP1	Ran GTPase-activating protein 1	31.9047	31.8789	31.7851	31.08	31.1147	31.0415	30.5176	30.2335	30.3532	-0.710633	0.00112026				+	+	FB-P_Ctrl;P-BF_Ctrl	29	29	29	57.4	57.4	57.4	63.541	0	323.31	55503000000	936	4.29816	0	-0.777463	-18.4916	4.10604	0	-1.4881	-16.5355	P46060
P46087	NOP2	Probable 28S rRNA (cytosine(4447)-C(5))-methyltransferase	29.9287	29.9094	29.8294	28.242	28.337	28.237	29.3816	29.29	29.2308	1.0288	4.67613e-05				+	+	FB-P_Ctrl;P-BF_Ctrl	19	19	19	26.6	26.6	26.6	89.301	0	144.7	9523300000	397	5.46512	0	-1.6172	-36.3304	3.41486	0	-0.588375	-11.0253	P46087
P46108	CRK	Adapter molecule crk	31.759	31.7358	31.7291	32.6148	32.7749	32.8396	32.7064	32.6883	32.7586	-0.0253333	0.735941				+	+	FB-P_Ctrl;P-BF_Ctrl	23	23	23	71.1	71.1	71.1	33.83	0	323.31	51243000000	864	3.9227	0	1.00182	14.8581	5.74151	0	0.976474	42.6105	P46108
P46109	CRKL	Crk-like protein	30.9699	30.8157	30.7937	31.5946	31.8488	31.7915	31.973	32.0799	32.1434	0.320467	0.0249647				+	+	FB-P_Ctrl;P-BF_Ctrl	18	18	18	60.1	60.1	60.1	33.777	0	323.31	27620000000	772	3.13407	0.000167247	0.885179	9.33079	4.06968	0	1.2057	16.1889	P46109
P46379	BAG6	Large proline-rich protein BAG6	25.1957	24.9356	24.9133	24.3075	Not detected	24.4229	Not detected	24.3047	Not detected	-0.0605	#DIV/0!				+		FB-P_Ctrl	7	7	7	8.9	8.9	8.9	119.41	0	13.054	326140000	22	1.86206	0.00314135	-0.649683	-5.21095	0	0.981091	-0.710164	0	P46379
P46459	NSF	Vesicle-fusing ATPase	27.7443	27.6594	27.6306	26.8901	26.6702	26.6389	26.1817	26.0358	Not detected	-0.624317	0.0124493				+	+	FB-P_Ctrl;P-BF_Ctrl	17	17	17	28	28	28	82.593	0	35.062	2724700000	86	3.40774	0.000230769	-0.94499	-10.979	3.71196	0	-1.56928	-22.4273	P46459
P46736	BRCC3	Lys-63-specific deubiquitinase BRCC36	25.6234	25.5963	25.5963	25.7813	25.7269	25.6139	25.0598	24.9548	24.8569	-0.7502	0.000608229					+	P-BF_Ctrl	4	4	4	17.4	17.4	17.4	36.072	0	9.971	702060000	37	0.95331	0.0369893	0.102082	2.03678	3.40061	0	-0.648132	-10.9328	P46736
P46776	RPL27A	60S ribosomal protein L27a	32.9278	32.4733	32.4378	30.9047	30.9824	31.0115	31.9908	31.8028	31.5475	0.814167	0.00354313				+	+	FB-P_Ctrl;P-BF_Ctrl	5	5	5	24.3	24.3	24.3	16.561	0	48.302	59000000000	205	3.28906	0.000196319	-1.64682	-10.2333	1.82564	0.00372348	-0.83261	-4.09285	P46776
P46777	RPL5	60S ribosomal protein L5	31.6444	31.5338	31.4515	30.6918	30.3991	30.7695	30.5586	30.2458	30.4239	-0.2107	0.218937				+	+	FB-P_Ctrl;P-BF_Ctrl	11	11	11	23.9	23.9	23.9	34.362	0	92.502	39894000000	407	2.7352	0.000747804	-0.923138	-7.33396	3.35686	0	-1.13383	-10.6532	P46777
P46779	RPL28	60S ribosomal protein L28	31.7015	31.693	31.6662	30.65	30.8871	30.8981	31.2596	31.9095	31.4662	0.733367	0.0243576				+		FB-P_Ctrl	7	7	7	40.1	40.1	40.1	15.747	0	127.91	42134000000	207	3.36776	0.000217687	-0.875161	-10.7222	0.300078	0.521189	-0.141827	-0.738681	P46779
P46781	RPS9	40S ribosomal protein S9	32.4922	32.431	32.4114	30.8938	30.8183	30.6489	31.0571	31.3693	31.1728	0.412733	0.0238817				+	+	FB-P_Ctrl;P-BF_Ctrl	16	16	16	45.9	45.9	45.9	22.591	0	58.523	63195000000	472	4.57404	0	-1.65788	-21.7029	3.72067	0	-1.24511	-13.2007	P46781
P46782	RPS5	40S ribosomal protein S5;40S ribosomal protein S5, N-terminally processed	27.473	27.3595	27.2796	27.1083	Not detected	Not detected	27.0393	26.6633	26.6151	-0.335733	#DIV/0!					+	P-BF_Ctrl	7	7	7	28.9	28.9	28.9	22.876	0	30.617	1634600000	41	0	0.991422	-0.262402	0	1.83367	0.00360467	-0.598132	-4.11546	P46782
P46783	RPS10	40S ribosomal protein S10;Putative 40S ribosomal protein S10-like	28.6942	28.4969	28.2617	26.5494	26.8328	26.6367	27.2044	27.4944	27.4049	0.694933	0.00440385				+	+	FB-P_Ctrl;P-BF_Ctrl	4	4	4	23.6	23.6	23.6	18.898	0	24.479	3594700000	165	3.56358	0	-1.81128	-12.0365	2.74214	0.000301166	-1.11631	-7.36509	P46783;Q9NQ39
P46821	MAP1B	Microtubule-associated protein 1B;MAP1B heavy chain;MAP1 light chain LC1	31.3256	31.3132	31.1796	30.5176	30.4018	30.2195	29.7672	29.6448	29.6228	-0.701367	0.00199433				+	+	FB-P_Ctrl;P-BF_Ctrl	61	61	60	37.2	37.2	36.8	270.63	0	323.31	33730000000	1136	3.08558	0.000158416	-0.89318	-9.06406	4.79076	0	-1.59453	-24.6057	P46821
P46937	YAP1	Transcriptional coactivator YAP1	25.7309	25.6633	25.6326	26.4704	26.1792	26.2885	Not detected	Not detected	Not detected	#DIV/0!	#DIV/0!				+		FB-P_Ctrl	6	6	6	21.6	21.6	21.6	54.461	0	30.273	706070000	23	2.68216	0.000967352	0.637114	7.09963	0	0.981457	Not detected	0	P46937
P46939	UTRN	Utrophin	28.4262	28.3325	28.3225	27.9848	27.8386	27.7342	27.3907	27.0266	27.198	-0.647433	0.00715751				+	+	FB-P_Ctrl;P-BF_Ctrl	38	38	37	14.7	14.7	14.4	394.46	0	146.51	4649900000	175	2.50467	0.00121251	-0.507881	-6.36239	3.32963	0	-1.15531	-10.4826	P46939
P46940	IQGAP1	Ras GTPase-activating-like protein IQGAP1	26.896	26.8841	26.8824	Not detected	26.2198	Not detected	26.1934	25.9211	25.7413	-0.267867	#DIV/0!					+	P-BF_Ctrl	19	19	18	15.3	15.3	14.8	189.25	0	51.46	1529100000	64	0	0.991794	-0.667716	0	2.68569	0.000513761	-0.935523	-7.11504	P46940;Q86VI3
P46977	STT3A	Dolichyl-diphosphooligosaccharide--protein glycosyltransferase subunit STT3A	28.6262	28.6198	28.5473	27.044	27.0203	27.0106	27.71	27.7347	27.6865	0.685433	2.30893e-06				+	+	FB-P_Ctrl;P-BF_Ctrl	12	12	11	18.3	18.3	17.3	80.529	0	36.292	5045700000	161	6.27421	0	-1.57282	-57.9263	5.17606	0	-0.887348	-30.7459	P46977
P47712	PLA2G4A	Cytosolic phospholipase A2;Phospholipase A2;Lysophospholipase	27.7626	27.7051	27.6034	27.0245	27.0674	26.887	26.4168	26.2871	26.5813	-0.564567	0.00503069				+	+	FB-P_Ctrl;P-BF_Ctrl	10	10	10	16	16	16	85.238	0	37.77	2739400000	112	3.20624	0.000180451	-0.697359	-9.74136	3.6956	0	-1.26197	-13.0079	P47712
P47755	CAPZA2	F-actin-capping protein subunit alpha-2	28.5885	28.4188	28.3528	28.1668	27.9762	27.9609	27.0949	27.348	27.1368	-0.8414	0.00120339				+	+	FB-P_Ctrl;P-BF_Ctrl	11	9	9	57	47.6	47.6	32.949	0	96.193	4410700000	216	1.91113	0.00285057	-0.418702	-4.33816	3.55569	0	-1.26011	-11.9808	P47755
P47756	CAPZB	F-actin-capping protein subunit beta	30.7428	30.676	30.6629	30.3583	30.1801	30.3337	29.1667	28.7023	28.7722	-1.4103	0.000808052				+	+	FB-P_Ctrl;P-BF_Ctrl	12	12	12	44.8	44.8	44.8	31.35	0	323.31	19830000000	380	2.56626	0.00116085	-0.403193	-6.61033	3.60927	0	-1.81352	-12.3646	P47756
P47897	QARS	Glutamine--tRNA ligase	28.6322	28.6274	28.5689	27.3982	27.4389	27.6773	27.4643	27.6905	27.7169	0.1191	0.371135				+	+	FB-P_Ctrl;P-BF_Ctrl	21	21	21	30.5	30.5	30.5	87.798	0	73.585	4892100000	181	3.60805	0	-1.10469	-12.3557	3.54636	0	-0.985588	-11.9151	P47897
P47914	RPL29	60S ribosomal protein L29	33.1833	33.0099	32.8664	30.0491	30.5973	30.1402	31.8588	32.0991	31.8765	1.6826	0.000834138				+	+	FB-P_Ctrl;P-BF_Ctrl	3	3	3	20.8	20.8	20.8	17.752	0	18.732	69517000000	140	3.85774	0	-2.75767	-14.3043	3.06777	0	-1.07509	-8.96782	P47914
P48047	ATP5O	ATP synthase subunit O, mitochondrial	27.7742	27.7612	27.7398	25.5434	25.1955	25.4254	26.2653	26.4154	25.9503	0.822233	0.00858249				+	+	FB-P_Ctrl;P-BF_Ctrl	7	7	7	39.9	39.9	39.9	23.277	0	25.031	2367200000	88	4.68103	0	-2.3703	-23.091	3.45134	0	-1.54808	-11.2656	P48047
P48382	RFX5	DNA-binding protein RFX5	27.6006	27.266	27.1741	28.4462	28.0331	28.2826	28.482	28.4375	28.5815	0.246367	0.125328				+	+	FB-P_Ctrl;P-BF_Ctrl	17	17	17	38.5	38.5	38.5	65.322	0	93.111	2114900000	107	2.16597	0.00216405	0.907073	5.13309	2.96982	0.000115385	1.15346	8.45533	P48382
P48426	PIP4K2A	Phosphatidylinositol 5-phosphate 4-kinase type-2 alpha	27.7254	27.7171	27.5013	27.3441	27.1467	26.7608	26.679	26.9376	26.6385	-0.332167	0.164091					+	P-BF_Ctrl	8	8	6	25.9	25.9	19.5	46.224	0	68.146	2217100000	63	1.41014	0.0104898	-0.56406	-3.02707	2.77869	0.000204126	-0.896205	-7.53113	P48426
P48444	ARCN1	Coatomer subunit delta	30.1852	30.1397	30.133	29.5939	29.8095	29.8774	29.4277	29.3162	29.3025	-0.411467	0.0119913				+	+	FB-P_Ctrl;P-BF_Ctrl	19	19	19	40.9	40.9	40.9	57.21	0	219.53	17957000000	277	1.96825	0.00277358	-0.392346	-4.50776	4.31972	0	-0.803808	-18.7247	P48444
P48556	PSMD8	26S proteasome non-ATPase regulatory subunit 8	28.8855	28.8744	28.842	28.482	28.5639	28.7139	28.3346	28.4649	28.398	-0.187433	0.0731867				+	+	FB-P_Ctrl;P-BF_Ctrl	12	12	12	37.7	37.7	37.7	39.611	0	51.701	6827400000	218	1.81348	0.00334856	-0.280684	-4.05876	3.52337	0	-0.46816	-11.7548	P48556
P48634	PRRC2A	Protein PRRC2A	29.9237	29.8144	29.7901	29.541	29.6395	29.5518	29.8761	29.5815	29.8634	0.196233	0.124197				+		FB-P_Ctrl	36	35	35	27.2	26.7	26.7	228.86	0	239.76	14195000000	507	2.16922	0.00217353	-0.265313	-5.1439	0.263661	0.618734	-0.0690689	-0.66068	P48634
P48643	CCT5	T-complex protein 1 subunit epsilon	30.4882	30.397	30.3036	29.4767	29.5575	29.6207	29.2168	28.9583	29.2827	-0.399033	0.0205624				+	+	FB-P_Ctrl;P-BF_Ctrl	23	23	23	49.7	49.7	49.7	59.67	0	263.25	18384000000	332	3.62552	0	-0.8446	-12.4833	3.42045	0	-1.24366	-11.0618	P48643
P49023	PXN	Paxillin	28.8112	28.5209	28.5037	28.569	28.2447	28.173	27.1797	26.8466	26.9719	-1.3295	0.00103512					+	P-BF_Ctrl	9	9	9	20.5	20.5	20.5	64.505	0	49.889	4519300000	121	0.833677	0.054889	-0.283044	-1.7975	3.49807	0	-1.61254	-11.5807	P49023
P49189	ALDH9A1	4-trimethylaminobutyraldehyde dehydrogenase	23.9404	23.8855	23.7959	24.7867	24.6766	24.5345	Not detected	24.2703	24.3776	-0.341983	0.0443702				+	+	FB-P_Ctrl;P-BF_Ctrl	3	3	3	8.3	8.3	8.3	53.801	0	8.224	170820000	15	3.14603	0.000170213	0.791997	9.39773	2.16277	0.00182972	0.449997	6.66886	P49189
P49207	RPL34	60S ribosomal protein L34	29.6485	29.6434	29.5761	27.2659	27.7832	27.7227	28.581	28.7827	28.6383	1.07673	0.00346355				+	+	FB-P_Ctrl;P-BF_Ctrl	3	3	3	13.7	13.7	13.7	13.293	0.00031939	5.0499	7825500000	93	3.60312	0	-2.03209	-12.3199	3.92049	0	-0.955346	-14.8389	P49207
P49321	NASP	Nuclear autoantigenic sperm protein	31.944	31.9413	31.8976	32.4666	32.3312	32.3693	32.4551	31.9217	32.2439	-0.182133	0.319169				+		FB-P_Ctrl	31	31	31	56.1	56.1	56.1	85.237	0	323.31	64391000000	986	3.3681	0.000218182	0.461388	10.7244	0.831175	0.0447405	0.279294	1.79255	P49321
P49327	FASN	Fatty acid synthase;[Acyl-carrier-protein] S-acetyltransferase;[Acyl-carrier-protein] S-malonyltransferase;3-oxoacyl-[acyl-carrier-protein] synthase;3-oxoacyl-[acyl-carrier-protein] reductase;3-hydroxyacyl-[acyl-carrier-protein] dehydratase;Enoyl-[acyl-carrier-protein] reductase;Oleoyl-[acyl-carrier-protein] hydrolase	50.4619	50.3939	50.2267	35.9503	35.9438	35.9354	35.0098	34.8841	34.9228	-1.00427	1.1457e-05				+	+	FB-P_Ctrl;P-BF_Ctrl	105	105	105	53.6	53.6	53.6	273.42	0	323.31	1.5695e+16	9413	8.47671	0	-14.4177	-205.919	8.38068	0	-15.422	-194.844	P49327
P49336	CDK8	Cyclin-dependent kinase 8;Cyclin-dependent kinase 19	24.6487	24.4851	24.4165	25.5779	25.4147	25.2179	25.8929	26.0612	26.8689	0.870833	0.0523101				+	+	FB-P_Ctrl;P-BF_Ctrl	4	4	4	9.5	9.5	9.5	53.283	0	5.7756	265030000	8	2.68345	0.000968523	0.886752	7.10527	2.32627	0.00107285	1.75761	5.68802	P49336;Q9BWU1
P49366	DHPS	Deoxyhypusine synthase	26.3793	26.3299	26.2954	27.1288	26.951	27.014	26.0443	26.4018	26.5101	-0.712533	0.00897972				+		FB-P_Ctrl	8	8	8	28.2	28.2	28.2	40.97	0	52.53	1132700000	70	3.57584	0	0.696422	12.1237	0.0383675	1	-0.0161451	-0.113039	P49366
P49368	CCT3	T-complex protein 1 subunit gamma	30.7992	30.6828	30.6098	30.3489	30.2126	30.1341	30.0877	30.1738	30.0831	-0.117	0.166804				+	+	FB-P_Ctrl;P-BF_Ctrl	26	26	26	46.8	46.8	46.8	60.533	0	323.31	22501000000	531	2.29338	0.00154717	-0.465433	-5.57039	3.13053	0	-0.582431	-9.31107	P49368
P49411	TUFM	Elongation factor Tu, mitochondrial	31.9633	31.9355	31.775	31.3223	31.0548	31.0707	31.515	31.5849	31.4535	0.368533	0.0175984				+	+	FB-P_Ctrl;P-BF_Ctrl	21	21	21	51.8	51.8	51.8	49.541	0	323.31	52553000000	643	2.68009	0.000966184	-0.742019	-7.09062	2.22807	0.00143378	-0.373448	-5.34268	P49411
P49585	PCYT1A	Choline-phosphate cytidylyltransferase A	26.6839	26.5868	26.5218	28.1	27.5833	27.9285	27.7643	27.4893	27.804	-0.184733	0.365897				+	+	FB-P_Ctrl;P-BF_Ctrl	11	11	11	42	42	42	41.731	0	36.257	1507700000	88	2.87868	0.00054979	1.27309	8.00257	3.23853	0	1.0884	9.93048	P49585;Q9Y5K3
P49588	AARS	Alanine--tRNA ligase, cytoplasmic	29.2097	29.1307	29.0445	27.4124	27.9374	28.0759	27.0388	26.7637	26.8089	-0.9381	0.0128699				+	+	FB-P_Ctrl;P-BF_Ctrl	23	23	23	30.4	30.4	30.4	106.81	0	253.23	6203600000	215	2.50318	0.0012099	-1.31977	-6.35647	4.68355	0	-2.25782	-23.1247	P49588
P49591	SARS	Serine--tRNA ligase, cytoplasmic	27.1454	27.114	26.976	25.8238	26.0072	26.1812	25.2187	25.57	25.2182	-0.668433	0.0128369				+	+	FB-P_Ctrl;P-BF_Ctrl	10	10	10	29	29	29	58.777	0	35.249	1618300000	72	3.12814	0.000165517	-1.07436	-9.2978	3.77054	0	-1.74279	-13.5924	P49591
P49643	PRIM2	DNA primase large subunit	27.8609	27.7548	27.7098	28.4942	28.7541	28.7773	28.2794	28.4391	28.3699	-0.3124	0.0373908				+	+	FB-P_Ctrl;P-BF_Ctrl	15	15	15	36	36	36	58.805	0	121.85	3314500000	121	3.05372	0.000154341	0.900016	8.89264	3.09669	0	0.587636	9.12451	P49643
P49711	CTCF	Transcriptional repressor CTCF	28.786	28.7141	28.5723	27.7688	27.5313	26.9185	27.7116	27.6364	27.2152	0.114867	0.718352				+	+	FB-P_Ctrl;P-BF_Ctrl	7	7	7	11.8	11.8	11.8	82.785	0	168.13	4742300000	69	2.1015	0.00236027	-1.28456	-4.92239	2.66271	0.000595405	-1.16973	-7.01539	P49711;Q8NI51
P49750	YLPM1	YLP motif-containing protein 1	30.8667	30.6778	30.5664	30.2561	30.1287	30.3056	30.3321	30.182	30.396	0.0732333	0.424645				+	+	FB-P_Ctrl;P-BF_Ctrl	46	46	46	27.6	27.6	27.6	241.64	0	323.31	19221000000	482	2.00824	0.00258065	-0.473522	-4.62935	1.6809	0.00437257	-0.400273	-3.69922	P49750
P49756	RBM25	RNA-binding protein 25	29.5013	29.4699	29.4676	29.1606	29.0159	29.3184	29.7899	29.6087	29.4483	0.450667	0.0267854				+		FB-P_Ctrl	22	22	22	26	26	26	100.18	0	197.92	9521200000	264	1.63315	0.00571272	-0.314639	-3.57492	0.615237	0.105441	0.135994	1.37008	P49756
P49757	NUMB	Protein numb homolog	27.6065	27.4724	27.4113	26.4132	26.4469	26.7544	26.1008	26.1956	26.4432	-0.291633	0.121943				+	+	FB-P_Ctrl;P-BF_Ctrl	9	9	9	16.4	16.4	16.4	70.803	0	24.055	2425900000	78	2.83601	0.00067659	-0.958506	-7.79828	3.35841	0	-1.25016	-10.663	P49757
P49770	EIF2B2	Translation initiation factor eIF-2B subunit beta	25.3699	25.3188	25.1543	24.3101	24.7276	Not detected	25.0805	25.1642	Not detected	0.6035	0.105182				+		FB-P_Ctrl	5	5	5	18.8	18.8	18.8	38.989	0	7.2843	420640000	21	1.63849	0.00572447	-0.762158	-4.31063	0.757945	0.0579094	-0.158667	-1.77149	P49770
P49773	HINT1	Histidine triad nucleotide-binding protein 1	29.8289	29.783	29.733	28.9229	30.5274	30.5634	28.9038	29.3895	29.1545	-0.8553	0.200626					+	P-BF_Ctrl	4	4	4	55.6	55.6	55.6	13.802	0	78.152	11547000000	216	0.153798	0.842068	0.222903	0.411527	1.94025	0.00294918	-0.632387	-4.42404	P49773
P49790	NUP153	Nuclear pore complex protein Nup153	30.3011	30.2407	30.2197	30.7628	30.3998	30.6302	30.9616	30.7171	30.7274	0.204433	0.198386				+	+	FB-P_Ctrl;P-BF_Ctrl	39	39	39	37.4	37.4	37.4	153.94	0	323.31	20523000000	612	1.46577	0.0090969	0.343756	3.15903	2.55578	0.000648445	0.54822	6.56756	P49790
P49792	RANBP2	E3 SUMO-protein ligase RanBP2	32.427	32.3084	32.2561	32.1012	31.916	31.9891	31.5425	31.2574	31.3165	-0.629967	0.00351808				+	+	FB-P_Ctrl;P-BF_Ctrl	100	100	67	43.8	43.8	31.4	358.2	0	323.31	70960000000	1730	1.94748	0.00275625	-0.328416	-4.44555	3.1705	0	-0.958376	-9.53599	P49792;Q99666;O14715;P0DJD0;P0DJD1
P49840	GSK3A	Glycogen synthase kinase-3 alpha	26.7246	26.5911	26.3206	25.8111	25.9107	25.9842	25.945	26.0644	25.9116	0.0716667	0.353353				+	+	FB-P_Ctrl;P-BF_Ctrl	7	7	5	18.2	18.2	14.3	50.98	0	46.938	1151200000	47	2.12207	0.00238638	-0.643401	-4.98886	1.96	0.00289675	-0.571775	-4.48298	P49840
P49848	TAF6	Transcription initiation factor TFIID subunit 6	26.4571	25.8797	25.8699	27.7247	27.3238	26.976	27.9776	27.4199	27.676	0.349667	0.264623				+	+	FB-P_Ctrl;P-BF_Ctrl	13	13	13	24.5	24.5	24.5	72.668	0	141.78	1029000000	63	1.92474	0.00279414	1.27259	4.37814	2.52151	0.000723915	1.62225	6.42938	P49848
P49915	GMPS	GMP synthase [glutamine-hydrolyzing]	29.5024	29.4636	29.3309	29.674	29.7644	29.6808	29.8657	29.4533	29.6138	-0.0621333	0.641304				+		FB-P_Ctrl	22	22	22	46.2	46.2	46.2	76.715	0	207.83	11036000000	266	2.00091	0.00256822	0.274064	4.60689	0.743845	0.0604741	0.21198	1.62085	P49915
P49916	LIG3	DNA ligase 3	28.7252	28.6813	28.6441	28.4257	28.1804	28.5851	29.0325	28.9571	28.9394	0.579267	0.00875706					+	P-BF_Ctrl	23	23	23	26.4	26.4	26.4	112.91	0	136.24	5357500000	165	1.12283	0.0219695	-0.286479	-2.38759	2.86231	0.000108475	0.292806	7.92363	P49916
P50225	SULT1A1	Sulfotransferase 1A1;Sulfotransferase 1A2	28.3458	28.0029	27.9805	26.2121	26.2008	26.7106	26.4307	27.1898	26.4718	0.322933	0.339931				+	+	FB-P_Ctrl;P-BF_Ctrl	11	11	11	45.8	45.8	45.8	34.165	0	39.679	3233700000	120	2.96783	0.000451128	-1.73528	-8.44518	2.17609	0.00184543	-1.41231	-5.16679	P50225;P50226;P0DMN0;P0DMM9
P50402	EMD	Emerin	29.6469	29.6464	29.6143	28.1715	28.0407	28.2068	28.2068	28.2427	28.2383	0.0896	0.158553				+	+	FB-P_Ctrl;P-BF_Ctrl	13	13	13	64.6	64.6	64.6	28.994	0	323.31	10084000000	308	5.07275	0	-1.4962	-28.9645	7.03778	0	-1.40661	-89.9278	P50402
P50454	SERPINH1	Serpin H1	28.4348	28.4173	28.3364	27.0512	27.8189	28.0278	27.4686	27.5587	27.8265	-0.0147	0.9651					+	P-BF_Ctrl	14	14	14	38.3	38.3	38.3	46.44	0	72.3	4277300000	183	1.2024	0.0173487	-0.763512	-2.55835	2.65199	0.00068254	-0.778229	-6.96932	P50454
Q8IZP2	ST13P4	Putative protein FAM10A4;Hsc70-interacting protein;Putative protein FAM10A5	26.5619	26.3645	26.3472	Not detected	25.0332	24.7826	25.3358	25.3865	25.1379	0.378833	0.0678683				+	+	FB-P_Ctrl;P-BF_Ctrl	3	3	3	15.4	15.4	15.4	27.406	0	8.6837	924930000	41	2.87924	0.000551336	-1.51665	-11.7627	3.42731	0	-1.13782	-11.1068	Q8IZP2;P50502;Q8NFI4
P50542	PEX5	Peroxisomal targeting signal 1 receptor	26.4663	26.2735	26.2598	25.9596	25.622	25.3998	Not detected	Not detected	25.0021	-0.658367	#DIV/0!				+		FB-P_Ctrl	11	11	11	25.4	25.4	25.4	70.864	0	32.827	1012600000	64	1.72828	0.00459714	-0.672733	-3.82521	0	0.975976	-1.33105	0	P50542
P50570	DNM2	Dynamin-2	27.535	27.5075	27.499	26.4643	26.5665	26.507	26.1511	26.2686	26.4595	-0.219533	0.0811323				+	+	FB-P_Ctrl;P-BF_Ctrl	13	13	9	18	18	13.6	98.063	0	30.756	2274700000	71	5.22982	0	-1.00122	-31.7158	3.75759	0	-1.22073	-13.4896	P50570;Q9UQ16
P50579	METAP2	Methionine aminopeptidase 2	27.6813	27.6446	27.6154	24.7716	24.8544	24.826	25.5055	24.5182	24.4733	0.015	0.966701				+	+	FB-P_Ctrl;P-BF_Ctrl	6	6	6	19.2	19.2	19.2	52.891	0	20.363	1771000000	29	7.07094	0	-2.82974	-91.6616	2.94777	0.000113879	-2.81476	-8.34373	P50579
P50583	NUDT2	Bis(5-nucleosyl)-tetraphosphatase [asymmetrical]	27.0467	26.5604	26.5206	25.5491	25.9122	Not detected	Not detected	Not detected	Not detected	#DIV/0!	#DIV/0!				+		FB-P_Ctrl	4	4	4	36.1	36.1	36.1	16.829	0	9.4186	1194400000	22	1.49774	0.0086499	-0.978591	-3.81	0	0.971983	Not detected	0	P50583
P50613	CDK7	Cyclin-dependent kinase 7	27.3576	27.1725	27.1522	27.666	27.9954	27.936	27.7558	26.8082	27.4893	-0.5147	0.161146				+		FB-P_Ctrl	10	10	9	32.9	32.9	30.6	39.038	0	42.045	1825300000	71	2.21371	0.00166159	0.638378	5.29363	0.16033	0.84782	0.123682	0.42708	P50613
P50747	HLCS	Biotin--protein ligase;Biotin--[methylmalonyl-CoA-carboxytransferase] ligase;Biotin--[propionyl-CoA-carboxylase [ATP-hydrolyzing]] ligase;Biotin--[methylcrotonoyl-CoA-carboxylase] ligase;Biotin--[acetyl-CoA-carboxylase] ligase	31.6398	31.4997	31.4925	30.8117	30.9509	30.7712	30.4522	30.7529	30.5966	-0.244033	0.0758691				+	+	FB-P_Ctrl;P-BF_Ctrl	25	25	25	48.5	48.5	48.5	80.759	0	323.31	40651000000	778	3.18923	0.000177122	-0.699414	-9.64311	3.16596	0	-0.943403	-9.51022	P50747
P50750	CDK9	Cyclin-dependent kinase 9	28.9733	28.8361	28.8269	29.8362	29.8356	29.8063	30.1866	30.1123	30.0999	0.3069	0.00044				+	+	FB-P_Ctrl;P-BF_Ctrl	12	11	11	36	33.9	33.9	42.777	0	156.04	6294800000	185	4.39766	0	0.947299	19.5919	4.67427	0	1.2542	23.0008	P50750;Q96Q40;O94921
P50851	LRBA	Lipopolysaccharide-responsive and beige-like anchor protein	29.4253	29.3466	29.3443	28.3878	28.2611	28.2111	27.8458	27.4953	27.7405	-0.5928	0.00701556				+	+	FB-P_Ctrl;P-BF_Ctrl	42	42	37	17.6	17.6	15.6	319.1	0	296.92	8536500000	353	4.29106	0	-1.08541	-18.4154	4.01256	0	-1.6782	-15.6584	P50851
P50914	RPL14	60S ribosomal protein L14	31.4351	31.2381	31.2335	29.8132	29.9593	29.8838	30.6118	30.9717	30.8206	0.915933	0.00124015				+	+	FB-P_Ctrl;P-BF_Ctrl	4	4	4	18.1	18.1	18.1	23.432	0	78.697	31637000000	222	4.25147	0	-1.41682	-17.9963	1.80995	0.00384731	-0.50086	-4.04889	P50914
P50991	CCT4	T-complex protein 1 subunit delta	30.9873	30.9005	30.8877	30.201	29.9713	30.0693	30.1899	29.8473	29.8562	-0.116067	0.425409				+	+	FB-P_Ctrl;P-BF_Ctrl	19	19	19	42.1	42.1	42.1	57.924	0	305.95	25604000000	482	3.48385	0	-0.844607	-11.4839	2.92111	0.00011215	-0.960702	-8.21056	P50991
P51003	PAPOLA	Poly(A) polymerase alpha	31.878	31.8262	31.6292	33.0065	33.1688	33.1034	33.1568	33.1204	33.2053	0.0679333	0.270508				+	+	FB-P_Ctrl;P-BF_Ctrl	36	36	33	50.6	50.6	47.2	82.842	0	323.31	59508000000	1430	3.90821	0	1.31509	14.7328	4.18947	0	1.38302	17.3587	P51003;Q9NRJ5
P51114	FXR1	Fragile X mental retardation syndrome-related protein 1	29.584	29.5418	29.4765	28.3735	28.5258	28.6281	28.0519	28.1677	28.1383	-0.389833	0.00883956				+	+	FB-P_Ctrl;P-BF_Ctrl	20	20	18	44.1	44.1	41.5	69.72	0	167.28	10819000000	330	3.66289	0	-1.02496	-12.7605	5.14846	0	-1.41479	-30.2597	P51114
P51116	FXR2	Fragile X mental retardation syndrome-related protein 2	28.5837	28.511	28.5096	27.6804	28.0155	27.7884	27.7436	27.972	27.8616	0.0309667	0.807136				+	+	FB-P_Ctrl;P-BF_Ctrl	19	17	16	41.9	39.5	36.7	74.222	0	259.93	5758000000	166	2.64632	0.00121842	-0.706683	-6.94509	3.1828	0	-0.675751	-9.60624	P51116
P51148	RAB5C	Ras-related protein Rab-5C	28.8639	28.6683	28.5518	27.7717	27.9194	27.9005	28.2163	28.2096	28.0975	0.3106	0.006747				+	+	FB-P_Ctrl;P-BF_Ctrl	7	7	5	43.1	43.1	32.9	23.482	0	94.56	5474100000	121	2.90458	0.000563218	-0.830837	-8.12896	2.20429	0.0014225	-0.520241	-5.26163	P51148
P51149	RAB7A	Ras-related protein Rab-7a	27.6898	27.4645	27.4464	26.8792	26.6178	26.4317	26.8605	26.9693	26.7674	0.222833	0.192422				+	+	FB-P_Ctrl;P-BF_Ctrl	8	8	8	43	43	43	23.489	0	66.935	2483700000	148	2.37772	0.00149066	-0.890643	-5.87608	2.62156	0.000669261	-0.667842	-6.84001	P51149
P51532	SMARCA4	Transcription activator BRG1	27.6364	27.6318	27.4119	28.2746	27.8721	27.8022	28.2106	27.9328	27.8986	0.0310333	0.869546					+	P-BF_Ctrl	22	22	14	17.7	17.7	11.7	184.64	0	69.803	2710200000	159	1.20607	0.0172512	0.42293	2.56632	1.67196	0.00436693	0.453911	3.67574	P51532
P51571	SSR4	Translocon-associated protein subunit delta	27.4197	27.1759	27.1558	27.0294	26.9497	26.8413	26.445	26.6914	26.8428	-0.2804	0.0938022					+	P-BF_Ctrl	4	4	4	30.6	30.6	30.6	18.998	0	39.23	1945400000	98	1.43158	0.0100687	-0.310311	-3.07758	1.83265	0.00366804	-0.590731	-4.11257	P51571
P51610	HCFC1	Host cell factor 1;HCF N-terminal chain 1;HCF N-terminal chain 2;HCF N-terminal chain 3;HCF N-terminal chain 4;HCF N-terminal chain 5;HCF N-terminal chain 6;HCF C-terminal chain 1;HCF C-terminal chain 2;HCF C-terminal chain 3;HCF C-terminal chain 4;HCF C-terminal chain 5;HCF C-terminal chain 6	31.3426	31.3057	31.3052	32.6556	32.4474	32.6162	32.991	32.8805	32.8635	0.3386	0.010866				+	+	FB-P_Ctrl;P-BF_Ctrl	39	39	38	29.6	29.6	29.1	208.73	0	323.31	51437000000	1101	4.37175	0	1.25525	19.2993	5.54755	0	1.59383	38.1002	P51610
P51617	IRAK1	Interleukin-1 receptor-associated kinase 1	29.3855	29.3155	29.2743	29.2281	29.1543	29.1944	27.9759	28.2509	28.2031	-1.04897	0.00027713				+	+	FB-P_Ctrl;P-BF_Ctrl	14	14	14	30.5	30.5	30.5	76.536	0	228.88	9021900000	312	1.57243	0.0067766	-0.132878	-3.4206	3.69623	0	-1.18183	-13.0127	P51617;P51955
P51648	ALDH3A2	Fatty aldehyde dehydrogenase	29.2087	29.1824	29.1787	28.2445	28.2517	28.2085	28.2421	28.0791	28.2861	-0.0324667	0.640481				+	+	FB-P_Ctrl;P-BF_Ctrl	11	11	11	26.4	26.4	26.4	54.847	0	108.73	8173400000	234	6.28724	0	-0.955034	-58.3629	3.99585	0	-0.987508	-15.5065	P51648;P48448;P30838;P43353
P51659	HSD17B4	Peroxisomal multifunctional enzyme type 2;(3R)-hydroxyacyl-CoA dehydrogenase;Enoyl-CoA hydratase 2	30.1319	29.4298	29.302	27.7686	27.9178	27.6995	28.6002	28.5922	28.5357	0.780733	0.000319884				+	+	FB-P_Ctrl;P-BF_Ctrl	17	17	17	31.4	31.4	31.4	79.685	0	295.59	7253600000	317	2.62799	0.00120561	-1.82591	-6.86716	1.8064	0.00383946	-1.04516	-4.03899	P51659
P51784	USP11	Ubiquitin carboxyl-terminal hydrolase 11	25.3718	25.3689	25.2277	24.9478	25.3941	25.6325	25.6333	25.5424	25.7132	0.304833	0.214201					+	P-BF_Ctrl	8	7	7	10.1	9.1	9.1	109.82	0	12.938	522290000	21	0.00315217	1	0.00198873	0.00964266	1.95806	0.00289257	0.306864	4.47715	P51784
P51812	RPS6KA3	Ribosomal protein S6 kinase alpha-3	27.3097	27.0387	27.0235	26.4193	26.4063	26.1475	Not detected	Not detected	Not detected	#DIV/0!	#DIV/0!				+		FB-P_Ctrl	13	12	8	23	21.9	15.8	83.735	0	26.059	1773600000	32	2.47051	0.0015891	-0.799608	-6.22832	0	1	Not detected	0	P51812;Q9UK32
P51858	HDGF	Hepatoma-derived growth factor	29.2609	29.1385	29.1073	28.896	29.1521	29.0477	28.6154	28.9055	28.9256	-0.216433	0.15786					+	P-BF_Ctrl	13	12	12	55.4	52.1	52.1	26.788	0	205.36	6371100000	188	0.7118	0.086007	-0.136943	-1.55824	1.48036	0.0065003	-0.35338	-3.19412	P51858
P51946	CCNH	Cyclin-H	25.221	25.0874	24.8616	26.1518	26.2727	26.8443	25.4909	25.4418	25.4968	-0.946433	0.0115367				+	+	FB-P_Ctrl;P-BF_Ctrl	6	6	6	17.6	17.6	17.6	37.643	0	12.727	406590000	23	2.3413	0.00146191	1.36628	5.74244	1.77394	0.00403478	0.419827	3.94921	P51946
P51948	MNAT1	CDK-activating kinase assembly factor MAT1	27.3006	27.2594	27.0199	27.7756	27.9737	27.9007	27.6811	27.6508	27.7797	-0.179467	0.0616932				+	+	FB-P_Ctrl;P-BF_Ctrl	9	9	9	43.4	43.4	43.4	35.823	0	107.04	1980100000	89	2.558	0.00115307	0.690018	6.57662	2.22438	0.00143151	0.510543	5.33004	P51948
P51957	NEK4	Serine/threonine-protein kinase Nek4	26.2686	26.2135	26.2132	26.2847	Not detected	Not detected	25.3346	25.2067	Not detected	-1.01405	#DIV/0!					+	P-BF_Ctrl	7	7	7	9.6	9.6	9.6	94.596	0	9.9206	970540000	29	0	0.972052	0.0529645	0	3.43037	0	-0.961124	-18.0449	P51957
P51991	HNRNPA3	Heterogeneous nuclear ribonucleoprotein A3	32.0021	31.8897	31.861	30.02	30.4246	30.357	31.0291	30.7755	30.8246	0.6092	0.0144156				+	+	FB-P_Ctrl;P-BF_Ctrl	19	19	19	37	37	37	39.594	0	323.31	42458000000	498	3.6238	0	-1.65039	-12.4707	3.5192	0	-1.04116	-11.7259	P51991
P52209	PGD	6-phosphogluconate dehydrogenase, decarboxylating	27.7019	27.5614	27.5224	25.5686	25.8064	25.5959	Not detected	Not detected	25.5991	-0.0578667	#DIV/0!				+		FB-P_Ctrl	8	8	8	20.5	20.5	20.5	53.139	0	87.166	1893800000	63	4.50777	0	-1.93827	-20.8847	0	1	-1.99611	0	P52209
P52272	HNRNPM	Heterogeneous nuclear ribonucleoprotein M	30.9581	30.9104	30.8561	30.0062	30.1606	30.1349	30.5979	30.4504	30.5667	0.437767	0.00261183				+	+	FB-P_Ctrl;P-BF_Ctrl	30	30	30	48.6	48.6	48.6	77.515	0	234.59	25007000000	536	3.86811	0	-0.80758	-14.3914	2.63314	0.000677165	-0.369829	-6.88899	P52272
P52292	KPNA2	Importin subunit alpha-1	28.4526	28.3333	28.3265	27.8354	28.1065	28.175	27.9624	27.7935	27.9393	-0.140567	0.293674					+	P-BF_Ctrl	14	14	14	33.1	33.1	33.1	57.861	0	155.65	4435500000	202	1.38842	0.010814	-0.331822	-2.97633	2.67368	0.000507553	-0.472417	-7.06279	P52292
P52298	NCBP2	Nuclear cap-binding protein subunit 2	25.296	25.2602	25.1854	25.9779	25.6651	25.7011	26.2871	25.9457	25.8848	0.257833	0.181268				+	+	FB-P_Ctrl;P-BF_Ctrl	2	2	2	12.2	12.2	12.2	18.001	0	20.349	428580000	32	2.16641	0.00216594	0.534181	5.13455	2.44336	0.000956444	0.792009	6.12346	P52298
P52434	POLR2H	DNA-directed RNA polymerases I, II, and III subunit RPABC3	26.9514	26.7812	26.6634	26.5622	26.6141	26.6079	26.2774	26.0827	26.5406	-0.2945	0.0923443					+	P-BF_Ctrl	4	4	4	28.7	28.7	28.7	17.143	0	60.756	1320800000	22	1.12588	0.0217446	-0.203908	-2.39406	1.47386	0.00680313	-0.498423	-3.17846	P52434
P52597	HNRNPF	Heterogeneous nuclear ribonucleoprotein F;Heterogeneous nuclear ribonucleoprotein F, N-terminally processed	29.4168	29.2353	29.153	29.6474	29.5543	29.7628	30.2122	30.0109	30.0324	0.430333	0.00803754				+	+	FB-P_Ctrl;P-BF_Ctrl	11	9	9	42.2	35.7	35.7	45.671	0	312.34	9186800000	186	1.76412	0.00413903	0.386491	3.92233	2.90061	0.000110983	0.816813	8.10945	P52597
P52630	STAT2	Signal transducer and activator of transcription 2	26.2889	26.2738	26.1476	25.1533	25.7601	25.7224	24.6938	24.8641	25.0437	-0.678067	0.0372356				+	+	FB-P_Ctrl;P-BF_Ctrl	5	5	5	10	10	10	97.915	0	13.376	904970000	42	1.57791	0.00671372	-0.691514	-3.43438	3.61301	0	-1.36956	-12.3918	P52630
P52655	GTF2A1	Transcription initiation factor IIA subunit 1;Transcription initiation factor IIA alpha chain;Transcription initiation factor IIA beta chain	28.7235	28.6327	28.6324	29.2676	29.092	29.0013	27.251	28.5721	29.3878	-0.716667	0.317104				+		FB-P_Ctrl	6	6	6	25	25	25	41.513	0	87.866	4875200000	128	2.26089	0.00150735	0.457451	5.45616	0.15562	0.85494	-0.259221	-0.415877	P52655
P52701	MSH6	DNA mismatch repair protein Msh6	28.966	28.7992	28.7845	29.683	29.5447	29.5958	29.3088	29.2764	29.3912	-0.282367	0.00593198				+	+	FB-P_Ctrl;P-BF_Ctrl	28	28	28	26.7	26.7	26.7	152.78	0	261.25	6669500000	344	3.36367	0.000216704	0.757954	10.6963	2.66939	0.00050501	0.475554	7.04422	P52701
P52732	KIF11	Kinesin-like protein KIF11	28.0961	27.8304	27.826	27.1254	26.5654	26.7217	26.6679	25.6652	26.5147	-0.521567	0.21431				+	+	FB-P_Ctrl;P-BF_Ctrl	17	17	17	18.6	18.6	18.6	119.16	0	64.283	2945700000	115	2.37948	0.00149213	-1.11332	-5.88259	2.13778	0.0019168	-1.63488	-5.04012	P52732
P52756	RBM5	RNA-binding protein 5	25.6939	25.3635	25.2725	26.7357	26.5916	26.6072	26.5329	26.3411	26.2439	-0.2722	0.0476524				+	+	FB-P_Ctrl;P-BF_Ctrl	5	4	4	8.3	7.1	7.1	92.153	0	21.337	878670000	21	3.04369	0.000481541	1.20155	8.83926	2.42385	0.000944688	0.929345	6.04905	P52756
P52907	CAPZA1	F-actin-capping protein subunit alpha-1	30.7668	30.7574	30.7564	30.7925	30.6293	30.8617	29.6574	29.3679	29.3777	-1.2935	0.000384155					+	P-BF_Ctrl	13	13	11	59.8	59.8	50.3	32.922	0	323.31	23938000000	615	0.00463937	1	0.000977198	0.0141682	3.77322	0	-1.29252	-13.6137	P52907
P52948	NUP98	Nuclear pore complex protein Nup98-Nup96;Nuclear pore complex protein Nup98;Nuclear pore complex protein Nup96	27.3925	27.3824	27.3527	26.96	26.4309	26.5316	26.6473	26.6782	26.3301	-0.0889667	0.674482				+	+	FB-P_Ctrl;P-BF_Ctrl	18	18	18	12.5	12.5	12.5	197.58	0	35.708	2310000000	105	1.97187	0.00278453	-0.735026	-4.51867	2.74229	0.000301486	-0.823984	-7.3658	P52948
P53004	BLVRA	Biliverdin reductase A	28.3625	28.2004	28.1853	27.4599	27.5359	27.4838	27.1292	27.067	27.2652	-0.3394	0.00563522				+	+	FB-P_Ctrl;P-BF_Ctrl	7	7	7	28	28	28	33.428	0	68.755	3443200000	136	3.61435	0	-0.756224	-12.4015	3.75214	0	-1.09562	-13.4466	P53004
P53007	SLC25A1	Tricarboxylate transport protein, mitochondrial	28.7901	28.5479	28.5413	27.5537	27.7207	27.5302	27.3704	27.5303	27.2395	-0.221467	0.0986052				+	+	FB-P_Ctrl;P-BF_Ctrl	5	5	5	17.7	17.7	17.7	34.012	0	46.098	4759800000	77	3.26699	0.000189349	-1.0249	-10.1	3.35186	0	-1.24634	-10.6217	P53007
P53367	ARFIP1	Arfaptin-1	26.913	26.8736	26.8441	27.5406	27.4094	27.3689	27.5201	27.3737	27.4714	0.0154333	0.830028				+	+	FB-P_Ctrl;P-BF_Ctrl	10	10	10	36.5	36.5	36.5	41.738	0	34.088	1992700000	61	3.27253	0.000190855	0.562731	10.1332	3.58479	0	0.578163	12.1877	P53367
P53396	ACLY	ATP-citrate synthase	30.1658	30.0664	30.0646	29.1317	29.2999	29.2085	28.7665	28.6158	28.7422	-0.5052	0.00169669				+	+	FB-P_Ctrl;P-BF_Ctrl	32	32	32	36	36	36	120.84	0	275.02	14572000000	450	3.93962	0	-0.885577	-15.0057	4.76285	0	-1.39077	-24.2114	P53396
P53618	COPB1	Coatomer subunit beta	28.9919	28.9488	28.9259	28.5562	28.5425	28.7462	28.1015	28.2823	28.0894	-0.457233	0.00725437				+	+	FB-P_Ctrl;P-BF_Ctrl	23	23	23	32.8	32.8	32.8	107.14	0	104.16	7508400000	245	2.11646	0.00238031	-0.340574	-4.97068	3.5888	0	-0.797801	-12.2166	P53618
P53621	COPA	Coatomer subunit alpha;Xenin;Proxenin	30.2997	30.2218	29.851	29.4801	29.2773	29.1257	29.5268	29.6532	29.5886	0.295167	0.053588				+	+	FB-P_Ctrl;P-BF_Ctrl	36	36	36	37.2	37.2	37.2	138.34	0	143.62	14395000000	518	2.06783	0.00232504	-0.829851	-4.815	1.69437	0.00431189	-0.534651	-3.73475	P53621
P53985	SLC16A1	Monocarboxylate transporter 1	29.3828	29.2612	29.209	28.0573	28.722	28.7689	28.3926	28.2406	28.5142	-0.1336	0.611758				+	+	FB-P_Ctrl;P-BF_Ctrl	9	9	9	13	13	13	53.944	0	77.407	8558900000	140	1.50851	0.00835798	-0.768239	-3.26246	3.17307	0	-0.901836	-9.55061	P53985
P53990	IST1	IST1 homolog	27.3401	27.2208	27.1152	26.4036	25.5979	26.4706	25.8307	Not detected	24.4128	-1.03562	0.204337				+	+	FB-P_Ctrl;P-BF_Ctrl	6	6	6	20.6	20.6	20.6	39.75	0	99.078	1549200000	36	1.68511	0.00509628	-1.06798	-3.7103	1.53315	0.00560638	-2.10358	-3.9316	P53990
P53992	SEC24C	Protein transport protein Sec24C	26.5979	26.4573	26.419	25.9535	25.4516	25.5172	25.7909	25.9882	25.8396	0.232133	0.239942				+	+	FB-P_Ctrl;P-BF_Ctrl	10	10	10	13.9	13.9	13.9	118.32	0	27.212	1081900000	69	2.15726	0.0022565	-0.850644	-5.10421	2.81153	0.000105843	-0.618498	-7.68318	P53992
P54105	CLNS1A	Methylosome subunit pICln	27.0759	26.9756	26.9474	27.3525	27.3103	27.3019	26.6687	26.9094	27.0721	-0.438167	0.0207175				+		FB-P_Ctrl	4	4	4	35.9	35.9	35.9	26.215	0	96.022	1733000000	58	2.80689	0.000660502	0.321924	7.66153	0.397962	0.295716	-0.116217	-0.94101	P54105
P54132	BLM	Bloom syndrome protein	27.1036	26.8756	26.8236	27.5839	27.0917	27.0419	27.1533	27.4814	27.395	0.104067	0.628458					+	P-BF_Ctrl	15	15	15	13.2	13.2	13.2	159	0	27.395	1627700000	59	0.722185	0.0831098	0.304909	1.57851	1.45528	0.00706866	0.408985	3.13391	P54132
P54136	RARS	Arginine--tRNA ligase, cytoplasmic	30.518	30.5115	30.5034	29.9262	29.8124	29.9424	29.7747	29.8574	29.7334	-0.105167	0.127349				+	+	FB-P_Ctrl;P-BF_Ctrl	29	29	29	46.1	46.1	46.1	75.378	0	156.84	20522000000	584	3.94053	0	-0.617341	-15.0137	4.40495	0	-0.722509	-19.675	P54136
P54277	PMS1	PMS1 protein homolog 1	27.8915	27.8246	27.6029	29.0635	28.8449	28.8501	28.799	28.8609	29.0076	-0.0303333	0.76532				+	+	FB-P_Ctrl;P-BF_Ctrl	26	26	26	35.2	35.2	35.2	105.83	0	96.252	3337400000	126	3.27333	0.000191235	1.14653	10.1381	3.32254	0	1.11618	10.4386	P54277
P54278	PMS2	Mismatch repair endonuclease PMS2	25.2691	25.1286	25.0318	27.1612	26.0734	26.6377	26.4903	26.057	26.2123	-0.3709	0.335001				+	+	FB-P_Ctrl;P-BF_Ctrl	10	10	10	16.9	16.9	16.9	95.796	0	20.025	559900000	34	2.00046	0.00256616	1.48089	4.60552	2.81392	0.00010596	1.11002	7.69432	P54278;Q13401;Q13670;A4D2B8
P54577	YARS	Tyrosine--tRNA ligase, cytoplasmic;Tyrosine--tRNA ligase, cytoplasmic, N-terminally processed	29.035	29.0227	28.8975	28.1694	28.1622	28.0819	27.8042	27.5647	27.6668	-0.459267	0.00357449				+	+	FB-P_Ctrl;P-BF_Ctrl	21	21	21	43	43	43	59.143	0	125.05	6945400000	268	4.07635	0	-0.847263	-16.2519	4.03961	0	-1.30653	-15.9075	P54577
P54578	USP14	Ubiquitin carboxyl-terminal hydrolase 14	29.9484	29.9103	29.8572	30.0347	30.0443	30.0293	29.3703	29.2552	29.3858	-0.699	7.232e-05				+	+	FB-P_Ctrl;P-BF_Ctrl	17	17	17	38.9	38.9	38.9	56.068	0	193.73	13469000000	391	2.08889	0.00234252	0.130826	4.88197	3.5024	0	-0.568179	-11.6103	P54578
P54619	PRKAG1	5-AMP-activated protein kinase subunit gamma-1	27.5662	27.4783	27.4321	27.2877	27.2509	27.1142	27.1341	26.8351	26.8673	-0.2721	0.0661529				+	+	FB-P_Ctrl;P-BF_Ctrl	9	9	8	33.5	33.5	30.5	37.579	0	17.856	2686200000	105	1.8531	0.00312952	-0.274614	-4.17054	2.22389	0.00143038	-0.54672	-5.32836	P54619
P54709	ATP1B3	Sodium/potassium-transporting ATPase subunit beta-3	26.4526	25.3531	25.3191	24.1962	24.0205	24.0805	24.4686	24.5215	24.3841	0.359	0.00532623				+	+	FB-P_Ctrl;P-BF_Ctrl	2	2	2	9	9	9	31.512	0	17.825	298220000	13	1.89181	0.00292988	-1.60922	-4.28184	1.53972	0.00550461	-1.25022	-3.33914	P54709
P54886	ALDH18A1	Delta-1-pyrroline-5-carboxylate synthase;Glutamate 5-kinase;Gamma-glutamyl phosphate reductase	30.4733	30.3553	30.3233	30.1387	29.6777	29.8611	29.7039	29.7395	29.8134	-0.140233	0.366473				+	+	FB-P_Ctrl;P-BF_Ctrl	28	28	28	42.8	42.8	42.8	87.301	0	266.36	18337000000	443	1.59298	0.00647453	-0.491487	-3.47237	3.45787	0	-0.631734	-11.3091	P54886
P55010	EIF5	Eukaryotic translation initiation factor 5	32.6605	32.5184	32.3876	31.6431	31.8543	31.7837	30.4649	30.4108	30.5502	-1.28507	6.50931e-05				+	+	FB-P_Ctrl;P-BF_Ctrl	13	13	13	27.6	27.6	27.6	49.222	0	192.25	81427000000	569	2.79195	0.000781127	-0.761766	-7.5922	4.68084	0	-2.04683	-23.0884	P55010
P55036	PSMD4	26S proteasome non-ATPase regulatory subunit 4	28.6181	28.4563	28.4517	28.1591	28.0236	27.9118	27.2558	27.4398	27.5007	-0.632733	0.0035127				+	+	FB-P_Ctrl;P-BF_Ctrl	7	7	5	20.2	20.2	12.7	40.736	0	65.25	4662500000	111	2.21592	0.00166757	-0.477205	-5.30115	3.57303	0	-1.10994	-12.1037	P55036
P55039	DRG2	Developmentally-regulated GTP-binding protein 2	27.6398	27.6344	27.6321	27.0116	27.246	28.032	26.3262	26.7788	26.6986	-0.828667	0.0706577					+	P-BF_Ctrl	10	9	9	32.1	30.2	30.2	40.746	0	58.495	3076200000	104	0.266232	0.61141	-0.205601	-0.666248	2.75364	0.000302449	-1.03427	-7.41699	P55039
P55060	CSE1L	Exportin-2	33.0511	32.9627	32.946	31.7901	31.6833	31.5789	31.7069	31.6803	31.9832	0.106033	0.406582				+	+	FB-P_Ctrl;P-BF_Ctrl	22	22	22	30	30	30	110.42	0	108.46	70313000000	243	4.33027	0	-1.30253	-18.8399	3.51654	0	-1.19648	-11.7075	P55060
P55072	VCP	Transitional endoplasmic reticulum ATPase	31.7492	31.6661	31.621	27.7346	26.3035	27.608	26.237	23.6657	26.472	-1.75713	0.156418				+	+	FB-P_Ctrl;P-BF_Ctrl	29	29	29	41.1	41.1	41.1	89.321	0	323.31	24012000000	497	3.20347	0.000179775	-4.46339	-9.7253	2.63916	0.000678501	-6.22052	-6.91457	P55072
P55196	MLLT4	Afadin	31.9933	31.9309	31.9176	31.7294	31.5364	31.5213	30.9575	30.806	30.895	-0.709533	0.000898043				+	+	FB-P_Ctrl;P-BF_Ctrl	64	64	64	43.8	43.8	43.8	206.8	0	323.31	58474000000	1229	2.11215	0.00237426	-0.351571	-4.95673	4.54386	0	-1.06109	-21.3264	P55196
P55209	NAP1L1	Nucleosome assembly protein 1-like 1	31.2773	31.1699	31.1438	30.3569	30.2224	30.2174	29.7328	29.965	29.8429	-0.418667	0.00670055				+	+	FB-P_Ctrl;P-BF_Ctrl	13	13	11	38.4	38.4	35.8	45.374	0	264.54	33337000000	503	3.96194	0	-0.931423	-15.2025	4.17316	0	-1.35013	-17.1948	P55209
P55265	ADAR	Double-stranded RNA-specific adenosine deaminase	29.7343	29.7115	29.6599	29.3842	29.3148	29.379	29.6683	29.4576	29.5195	0.189133	0.046447				+		FB-P_Ctrl	24	24	24	25.3	25.3	25.3	136.06	0	205.25	12247000000	422	3.4007	0.00022695	-0.342601	-10.9333	1.0884	0.0192846	-0.153446	-2.31499	P55265
P55327	TPD52	Tumor protein D52	27.073	26.9987	26.9884	27.1058	27.3596	27.5586	26.7637	26.7146	26.698	-0.6159	0.00967552					+	P-BF_Ctrl	8	8	8	53.1	53.1	53.1	24.327	0	55.804	1880600000	97	1.1301	0.0215796	0.321306	2.403	3.05299	0	-0.294567	-8.88871	P55327
P55769	NHP2L1	NHP2-like protein 1;NHP2-like protein 1, N-terminally processed	27.6945	27.2315	26.8744	26.3756	26.0696	26.2166	26.4983	26.5358	26.5637	0.312	0.0259919				+	+	FB-P_Ctrl;P-BF_Ctrl	3	3	3	24.2	24.2	24.2	14.173	0	55.454	1517600000	28	1.83895	0.00310845	-1.04622	-4.13037	1.4339	0.0073191	-0.734229	-3.08307	P55769
P55786	NPEPPS	Puromycin-sensitive aminopeptidase	28.3021	28.1136	28.0055	26.0436	26.1902	25.7004	26.5439	26.1769	26.7184	0.501667	0.0806339				+	+	FB-P_Ctrl;P-BF_Ctrl	17	17	17	25.8	25.8	25.8	103.28	0	72.884	3112300000	138	3.6669	0	-2.1623	-12.7906	3.10036	0	-1.66063	-9.14457	P55786;A6NEC2
P55884	EIF3B	Eukaryotic translation initiation factor 3 subunit B	29.3152	29.2856	29.2029	27.7838	28.2597	28.4995	27.9687	27.8649	27.9463	-0.254367	0.297723				+	+	FB-P_Ctrl;P-BF_Ctrl	24	24	24	39.7	39.7	39.7	92.48	0	247.92	8659900000	308	2.1568	0.00225455	-1.08691	-5.10269	5.08136	0	-1.34127	-29.1089	P55884
P56134	ATP5J2	ATP synthase subunit f, mitochondrial	26.6651	26.6621	26.3976	25.2247	25.6904	25.4256	25.5453	26.1737	25.796	0.391433	0.15977				+	+	FB-P_Ctrl;P-BF_Ctrl	2	2	2	25.5	25.5	25.5	10.918	0	36.15	990190000	44	2.65678	0.0012242	-1.12805	-6.98989	1.65384	0.00433333	-0.736614	-3.62845	P56134
P56182	RRP1	Ribosomal RNA processing protein 1 homolog A	27.3679	27.2966	27.0594	25.8337	25.5694	25.8388	26.4371	26.6435	26.7618	0.866833	0.0026331				+	+	FB-P_Ctrl;P-BF_Ctrl	9	9	9	28.6	28.6	28.6	52.839	0	34.574	1564600000	77	3.49986	0	-1.49395	-11.5929	2.03584	0.00253037	-0.627166	-4.71466	P56182
P56192	MARS	Methionine--tRNA ligase, cytoplasmic	29.3411	29.0903	29.0714	28.1578	28.1598	28.1459	28.18	28.0876	28.1556	-0.0134333	0.656273				+	+	FB-P_Ctrl;P-BF_Ctrl	20	20	20	28.1	28.1	28.1	101.11	0	212.78	7286800000	306	3.50668	0	-1.01308	-11.6396	3.44948	0	-1.02653	-11.2532	P56192
P56270	MAZ	Myc-associated zinc finger protein	29.2803	29.0979	29.0639	26.4744	27.3866	27.3862	27.9324	28.3246	28.193	1.0676	0.0303917				+	+	FB-P_Ctrl;P-BF_Ctrl	3	3	3	6.7	6.7	6.7	48.607	0	8.6758	4881900000	60	2.57172	0.00117007	-2.06498	-6.63272	2.76691	0.000201933	-0.997372	-7.47728	P56270;Q14119;Q9HBE1
P56537	EIF6	Eukaryotic translation initiation factor 6	25.9721	25.9375	25.8381	25.4623	25.3398	25.3856	24.7674	25.5877	25.538	-0.0982	0.732547				+		FB-P_Ctrl	3	3	3	22.9	22.9	22.9	26.599	0	11.331	688900000	33	3.19387	0.000177778	-0.519981	-9.6698	1.08202	0.019576	-0.61813	-2.30164	P56537
P56545	CTBP2	C-terminal-binding protein 2	26.0793	26.0647	26.0381	25.6173	25.7961	25.3197	25.6136	25.7991	25.6235	0.101033	0.541201				+	+	FB-P_Ctrl;P-BF_Ctrl	7	7	7	19.6	19.6	19.6	48.944	0	15.991	940130000	57	1.58925	0.00653012	-0.482986	-3.46296	2.46755	0.000789901	-0.381981	-6.21682	P56545;Q13363
P57076	C21orf59	UPF0769 protein C21orf59	27.9632	27.8474	27.567	27.2001	27.0968	27.0173	26.4192	26.6657	26.6366	-0.5309	0.00485324				+	+	FB-P_Ctrl;P-BF_Ctrl	11	11	11	42.1	42.1	42.1	33.224	0	82.197	2602300000	86	2.22504	0.00167509	-0.687778	-5.3323	3.00624	0	-1.21867	-8.64266	P57076
P57088	TMEM33	Transmembrane protein 33	28.0793	28.0325	27.9014	26.9168	26.8609	26.8135	26.8007	26.9633	26.7525	-0.0249	0.741466				+	+	FB-P_Ctrl;P-BF_Ctrl	6	6	6	22.3	22.3	22.3	27.978	0	59.892	2947600000	80	4.31636	0	-1.14069	-18.6882	3.82474	0	-1.16557	-14.0307	P57088
P57678	GEMIN4	Gem-associated protein 4	26.7262	26.6807	26.1823	25.6559	25.2315	25.2422	25.4925	25.4758	24.8458	-0.105167	0.700741				+	+	FB-P_Ctrl;P-BF_Ctrl	9	9	9	10.2	10.2	10.2	120.04	0	26.46	1010400000	38	2.17535	0.00217926	-1.15326	-5.16432	1.99062	0.0027016	-1.25841	-4.57547	P57678
P57737	CORO7	Coronin-7	27.2976	27.222	27.2007	26.8947	26.9644	26.8345	26.3587	26.5145	26.6659	-0.384833	0.0161808				+	+	FB-P_Ctrl;P-BF_Ctrl	11	11	11	21.2	21.2	21.2	100.6	0	55.691	1852700000	93	2.69965	0.000863804	-0.34225	-7.17616	2.83261	0.000107143	-0.727109	-7.78218	P57737
P57740	NUP107	Nuclear pore complex protein Nup107	27.3796	27.3476	27.3265	27.0461	26.498	26.7846	26.3284	26.2849	26.6959	-0.339833	0.172792				+	+	FB-P_Ctrl;P-BF_Ctrl	14	14	14	21.7	21.7	21.7	106.37	0	113.29	2442200000	118	1.64891	0.0054824	-0.575003	-3.61565	2.65187	0.000681863	-0.914864	-6.96884	P57740
P58107	EPPK1	Epiplakin	28.614	28.565	28.2871	26.1413	26.8306	26.333	26.2488	27.0493	26.2016	0.0649333	0.85918				+	+	FB-P_Ctrl;P-BF_Ctrl	20	20	16	25.5	25.5	19.9	555.65	0	167.01	3759800000	133	3.06598	0.000155592	-2.05377	-8.95822	2.60772	0.000665377	-1.98885	-6.78192	P58107
P59998	ARPC4	Actin-related protein 2/3 complex subunit 4	26.6278	26.5646	26.5476	26.2368	26.2114	26.3071	25.7965	25.8733	26.0244	-0.3537	0.00829069				+	+	FB-P_Ctrl;P-BF_Ctrl	4	4	4	22.6	22.6	22.6	19.667	0	27.949	1367600000	52	3.02263	0.000471698	-0.328266	-8.72823	3.17659	0	-0.681982	-9.57068	P59998
P60228	EIF3E	Eukaryotic translation initiation factor 3 subunit E	28.3058	28.3053	28.2437	27.6075	27.26	27.106	27.0418	27.065	27.2162	-0.216833	0.242065				+	+	FB-P_Ctrl;P-BF_Ctrl	13	13	13	35.1	35.1	35.1	52.22	0	36.058	4506600000	115	2.51779	0.00122307	-0.960463	-6.41452	4.44527	0	-1.17728	-20.1409	P60228
P60468	SEC61B	Protein transport protein Sec61 subunit beta	28.3447	28.1775	28.0864	Not detected	24.9879	26.1284	26.4848	Not detected	26.734	1.05125	0.2135				+	+	FB-P_Ctrl;P-BF_Ctrl	3	3	3	37.5	37.5	37.5	9.9743	0	95.21	2693400000	53	2.0459	0.00238683	-2.64471	-6.06466	2.88577	0.000110092	-1.59344	-11.8229	P60468
P60510	PPP4C	Serine/threonine-protein phosphatase 4 catalytic subunit	27.7409	27.631	27.6267	29.0885	28.9233	29.1494	28.5641	27.8815	28.1628	-0.850933	0.0152688				+		FB-P_Ctrl	10	10	10	28	28	28	35.08	0	125.75	2750000000	109	4.24907	0	1.38754	17.9713	1.24979	0.0120248	0.536613	2.66219	P60510
P60660	MYL6	Myosin light polypeptide 6	28.6861	28.3376	27.9231	26.619	26.8303	26.972	26.7864	26.5049	26.6189	-0.170367	0.263772				+	+	FB-P_Ctrl;P-BF_Ctrl	6	6	6	40.4	40.4	40.4	16.93	0	19.122	3176700000	97	2.46389	0.00158412	-1.5085	-6.20262	2.69099	0.000516393	-1.67887	-7.13817	P60660;P14649
P60709	ACTB	Actin, cytoplasmic 1;Actin, cytoplasmic 1, N-terminally processed;Actin, cytoplasmic 2;Actin, cytoplasmic 2, N-terminally processed	33.7179	33.4298	33.3176	32.4544	32.5506	32.5358	32.5869	32.6236	32.606	0.0919	0.0442765				+	+	FB-P_Ctrl;P-BF_Ctrl	18	18	5	57.1	57.1	21.3	41.736	0	323.31	1527500000000000	1266	2.86362	0.000541436	-0.974829	-7.92992	2.74449	0.000302128	-0.882919	-7.37567	P60709;P63261;Q9BYX7
P60842	EIF4A1	Eukaryotic initiation factor 4A-I	33.1879	32.9521	32.9467	32.0816	32.0411	31.9864	31.5401	31.621	31.6492	-0.432933	0.000536503				+	+	FB-P_Ctrl;P-BF_Ctrl	26	26	13	58.9	58.9	30.3	46.153	0	323.31	1148400000000000	1352	3.52877	0	-0.992525	-11.7922	4.1105	0	-1.42548	-16.5786	P60842
P60866	RPS20	40S ribosomal protein S20	31.2821	31.2607	31.2563	30.2732	30.0882	30.1087	30.2172	30.2479	30.2303	0.0751	0.273541				+	+	FB-P_Ctrl;P-BF_Ctrl	4	4	4	23.5	23.5	23.5	13.373	0	71.473	32068000000	232	4.32471	0	-1.1097	-18.779	6.97489	0	-1.0346	-86.7288	P60866
P60891	PRPS1	Ribose-phosphate pyrophosphokinase 1	28.9739	28.9166	28.7207	27.5017	28.1091	27.9797	27.4401	27.6018	27.5086	-0.346667	0.143022				+	+	FB-P_Ctrl;P-BF_Ctrl	8	8	3	24.8	24.8	9.4	34.834	0	55.064	6617600000	117	2.13614	0.0023259	-1.00687	-5.03473	3.9463	0	-1.35355	-15.0643	P60891;P21108
P60953	CDC42	Cell division control protein 42 homolog	25.5624	25.5208	25.457	24.8768	24.859	Not detected	24.1227	24.3571	24.0418	-0.694033	0.010826				+	+	FB-P_Ctrl;P-BF_Ctrl	2	2	2	15.7	15.7	15.7	21.258	0	18.726	430380000	28	3.28269	0.000193939	-0.645488	-16.0961	3.75607	0	-1.33952	-13.4776	P60953
P61011	SRP54	Signal recognition particle 54 kDa protein	27.999	27.9565	27.8689	27.1224	27.0907	27.2429	25.9505	26.0211	26.1352	-1.1164	9.57059e-05				+	+	FB-P_Ctrl;P-BF_Ctrl	13	13	13	30.2	30.2	30.2	55.704	0	51.883	3189800000	98	3.71095	0	-0.789459	-13.1256	5.06615	0	-1.90588	-28.8541	P61011
P61019	RAB2A	Ras-related protein Rab-2A	26.9006	26.8868	26.856	26.6391	26.5197	26.5336	26.6046	26.5832	26.4038	-0.0336	0.673297				+	+	FB-P_Ctrl;P-BF_Ctrl	7	7	3	43.9	43.9	20.8	23.545	0	54.774	1693300000	78	2.8658	0.000542936	-0.317021	-7.94043	2.24286	0.00144064	-0.350623	-5.39357	P61019
P61024	CKS1B	Cyclin-dependent kinases regulatory subunit 1	27.7922	27.5682	27.5557	24.1359	25.8937	24.7593	24.3834	23.9805	24.4653	-0.653233	0.289833				+	+	FB-P_Ctrl;P-BF_Ctrl	3	3	3	65.8	65.8	65.8	9.6601	0	10.904	864490000	20	2.18824	0.00183554	-2.70906	-5.20749	4.43047	0	-3.36232	-19.9687	P61024
P61026	RAB10	Ras-related protein Rab-10	26.7779	26.7629	26.7308	24.9771	25.9442	25.2892	25.9264	26.0514	26.0383	0.601867	0.104607				+	+	FB-P_Ctrl;P-BF_Ctrl	3	2	2	17	11.5	11.5	22.541	0	22.959	1260900000	21	2.04562	0.00238487	-1.35373	-4.74518	4.24152	0	-0.751841	-17.8924	P61026;Q92930;P59190
P61081	UBE2M	NEDD8-conjugating enzyme Ubc12	30.9123	30.8376	30.6586	29.871	30.3307	30.3251	29.6943	29.9955	29.8257	-0.3371	0.127149				+	+	FB-P_Ctrl;P-BF_Ctrl	6	6	6	27.3	27.3	27.3	20.9	0	142.27	20799000000	138	1.67815	0.00520559	-0.627227	-3.69198	2.95374	0.000114422	-0.964321	-8.37377	P61081
P61088	UBE2N	Ubiquitin-conjugating enzyme E2 N;Putative ubiquitin-conjugating enzyme E2 N-like	28.2074	28.0797	27.8415	25.6259	26.5739	25.01	26.9639	27.3581	27.005	1.3724	0.0437101				+	+	FB-P_Ctrl;P-BF_Ctrl	5	5	5	42.1	42.1	42.1	17.138	0	38.334	2969200000	59	2.10546	0.00236624	-2.30624	-4.93514	2.32052	0.00106931	-0.933876	-5.66731	P61088;Q5JXB2
P61106	RAB14	Ras-related protein Rab-14	28.104	28.0714	28.0665	27.7788	27.2392	27.8904	27.7187	27.772	27.8675	0.149933	0.506493					+	P-BF_Ctrl	10	10	10	55.3	55.3	55.3	23.897	0	62.509	3994300000	115	1.03648	0.0284755	-0.444496	-2.20689	2.54691	0.000644195	-0.294558	-6.53158	P61106
P61158	ACTR3	Actin-related protein 3	26.9763	26.8527	26.8437	26.5642	26.6566	26.6269	25.8235	25.8311	25.7898	-0.8011	1.1763e-05				+	+	FB-P_Ctrl;P-BF_Ctrl	6	6	6	20.6	20.6	20.6	47.371	0	17.385	1528000000	63	2.25161	0.00170119	-0.275	-5.42387	4.7564	0	-1.07613	-24.1212	P61158;Q9P1U1
P61160	ACTR2	Actin-related protein 2	26.5231	26.3246	26.1762	25.8973	26.6294	26.6486	25.9051	25.9716	25.5183	-0.593433	0.105608					+	P-BF_Ctrl	7	7	7	22.6	22.6	22.6	44.76	0	14.267	985120000	35	0.065881	0.974897	0.0504653	0.189063	1.45413	0.00706444	-0.542948	-3.13117	P61160
P61163	ACTR1A	Alpha-centractin	27.6508	27.635	27.5264	28.6477	28.4504	28.6557	27.0714	26.9565	26.9178	-1.6027	3.93547e-05				+	+	FB-P_Ctrl;P-BF_Ctrl	10	10	6	44.9	44.9	32.2	42.613	0	137.82	2852900000	176	3.64401	0	0.98051	12.6197	3.29793	0	-0.622186	-10.2873	P61163
P61201	COPS2	COP9 signalosome complex subunit 2	25.8905	25.8779	25.7619	25.6707	25.5029	25.479	Not detected	26.1011	25.4075	0.203433	0.50586				+		FB-P_Ctrl	6	6	6	16.9	16.9	16.9	51.596	0	6.7383	813660000	30	1.79705	0.00364835	-0.292542	-4.01299	0.120473	0.909061	-0.0891202	-0.337827	P61201
P84077	ARF1	ADP-ribosylation factor 1;ADP-ribosylation factor 3	31.4008	31.2794	31.2081	30.6797	30.4987	30.5533	30.1913	30.3552	30.2507	-0.3115	0.0123214				+	+	FB-P_Ctrl;P-BF_Ctrl	12	12	7	64.1	64.1	35.4	20.697	0	323.31	35236000000	716	3.11985	0.000163543	-0.718904	-9.25182	3.81427	0	-1.03037	-13.9451	P84077;P61204
P61221	ABCE1	ATP-binding cassette sub-family E member 1	28.8802	28.8125	28.8112	27.926	27.765	27.4201	27.4776	27.5115	27.5909	-0.177033	0.311502				+	+	FB-P_Ctrl;P-BF_Ctrl	15	15	15	35.2	35.2	35.2	67.314	0	129.43	5749800000	157	2.77015	0.000771022	-1.13093	-7.49203	5.25826	0	-1.30799	-32.2409	P61221
P61224	RAP1B	Ras-related protein Rap-1b;Ras-related protein Rap-1A;Ras-related protein Rap-1b-like protein	26.8856	26.6606	26.6081	25.4205	24.862	24.5781	24.4414	24.2296	24.773	-0.4722	0.183121				+	+	FB-P_Ctrl;P-BF_Ctrl	3	3	3	17.9	17.9	17.9	20.825	0	42.963	1200800000	42	2.59833	0.00118621	-1.76458	-6.74273	3.62146	0	-2.23677	-12.4535	P61224;P62834;A6NIZ1
P61247	RPS3A	40S ribosomal protein S3a	32.7465	32.5186	32.4277	31.0858	31.5699	31.5102	31.4474	32.0898	31.9999	0.457067	0.144047				+	+	FB-P_Ctrl;P-BF_Ctrl	15	15	15	43.6	43.6	43.6	29.945	0	323.31	71918000000	497	2.55159	0.00114412	-1.17562	-6.55053	1.49738	0.00635823	-0.718561	-3.23535	P61247
P61254	RPL26	60S ribosomal protein L26	31.911	31.7928	31.7815	29.9382	30.2847	30.2892	31.1162	31.5108	31.2559	1.1236	0.00236975				+	+	FB-P_Ctrl;P-BF_Ctrl	11	11	2	44.1	44.1	6.9	17.258	0	48.751	42266000000	294	3.75017	0	-1.65776	-13.431	1.91596	0.00291166	-0.534149	-4.35232	P61254
P61313	RPL15	60S ribosomal protein L15	32.9291	32.8286	32.7829	31.6273	31.6743	31.966	31.8864	31.9715	31.7911	0.127133	0.342157				+	+	FB-P_Ctrl;P-BF_Ctrl	8	8	8	38.7	38.7	38.7	24.146	0	136.01	85249000000	474	3.17064	0.000172973	-1.09102	-9.53679	3.85008	0	-0.963877	-14.2404	P61313
P61326	MAGOH	Protein mago nashi homolog	26.8621	26.838	26.7918	27.5461	27.712	27.9216	27.3782	27.2513	27.2028	-0.449133	0.020385				+	+	FB-P_Ctrl;P-BF_Ctrl	6	6	1	43.2	43.2	5.5	17.163	0	34.917	1307400000	68	2.89909	0.000558405	0.89593	8.10203	2.86837	0.000108844	0.446832	7.95279	P61326
P61353	RPL27	60S ribosomal protein L27	31.7475	31.3067	31.2978	30.172	30.1972	30.1443	30.5779	30.4272	30.6285	0.373367	0.00391239				+	+	FB-P_Ctrl;P-BF_Ctrl	7	7	7	45.6	45.6	45.6	15.798	0	171.25	30628000000	405	2.99315	0.000462963	-1.27952	-8.57489	2.31667	0.00123558	-0.90612	-5.65349	P61353
P61604	HSPE1	10 kDa heat shock protein, mitochondrial	24.4879	24.4526	24.4361	25.1475	24.9573	24.9069	Not detected	Not detected	24.5529	-0.451	#DIV/0!				+		FB-P_Ctrl	4	4	4	42.2	42.2	42.2	10.932	0.00028868	3.5005	288440000	12	2.72369	0.00074407	0.545043	7.28252	0	1	0.0939859	0	P61604
P61619	SEC61A1	Protein transport protein Sec61 subunit alpha isoform 1	28.3057	28.1561	28.0794	26.626	Not detected	26.4189	26.4257	26.1872	27.2429	0.09615	0.833575				+	+	FB-P_Ctrl;P-BF_Ctrl	7	7	7	14.7	14.7	14.7	52.264	0	16.652	3547100000	41	3.1361	0.000167539	-1.6579	-14.3665	2.05784	0.00231767	-1.56177	-4.78351	P61619;Q9H9S3
P61758	VBP1	Prefoldin subunit 3	28.5665	28.3503	28.2606	27.1351	27.1137	27.3227	27.1102	26.8072	27.1746	-0.159833	0.29036				+	+	FB-P_Ctrl;P-BF_Ctrl	8	8	8	41.1	41.1	41.1	22.626	0	78.735	3513500000	61	3.36236	0.00021573	-1.20198	-10.6879	3.14317	0	-1.36177	-9.38166	P61758
P61803	DAD1	Dolichyl-diphosphooligosaccharide--protein glycosyltransferase subunit DAD1	27.5668	27.4011	27.2828	26.6675	25.9623	Not detected	Not detected	Not detected	Not detected	#DIV/0!	#DIV/0!				+		FB-P_Ctrl	3	3	3	28.3	28.3	28.3	12.497	0	17.347	2082300000	58	1.52025	0.00827937	-1.10201	-3.88698	0	1	Not detected	0	P61803
P61923	COPZ1	Coatomer subunit zeta-1	28.1366	28.1133	28.0702	27.4257	27.8605	27.7564	26.0279	26.5611	26.6664	-1.2624	0.00599259				+	+	FB-P_Ctrl;P-BF_Ctrl	5	5	5	32.8	32.8	32.8	20.198	0	34.811	3289100000	81	1.48827	0.00878411	-0.42585	-3.21325	2.97875	0.000116364	-1.68825	-8.50091	P61923
P61962	DCAF7	DDB1- and CUL4-associated factor 7	27.5259	27.3996	27.3271	26.0824	26.8204	26.4169	26.8956	26.2085	26.4679	0.0841	0.788104				+	+	FB-P_Ctrl;P-BF_Ctrl	6	6	6	23.1	23.1	23.1	38.926	0	25.528	2366600000	67	1.93925	0.00282243	-0.977633	-4.42106	1.89255	0.00302172	-0.89355	-4.28397	P61962
P61978	HNRNPK	Heterogeneous nuclear ribonucleoprotein K	33.6425	33.6373	33.6087	33.0681	33.2027	33.2723	33.3882	33.4131	33.4192	0.2258	0.0204538				+	+	FB-P_Ctrl;P-BF_Ctrl	25	25	25	50.3	50.3	50.3	50.976	0	323.31	1590100000000000	1394	2.74385	0.000755387	-0.448475	-7.37281	4.02222	0	-0.222692	-15.7469	P61978
P62081	RPS7	40S ribosomal protein S7	32.0406	31.9748	31.6925	30.0738	30.9906	30.9887	30.5647	31.1623	31.0849	0.252933	0.519219				+	+	FB-P_Ctrl;P-BF_Ctrl	12	12	12	61.3	61.3	61.3	22.127	0	259.52	42450000000	342	1.70649	0.00477392	-1.21829	-3.76692	1.95611	0.00288633	-0.965364	-4.47132	P62081
P62140	PPP1CB	Serine/threonine-protein phosphatase PP1-beta catalytic subunit	28.6358	28.306	28.2795	29.1826	28.5965	28.4691	28.8402	28.8805	28.8623	0.1116	0.638666					+	P-BF_Ctrl	10	4	4	32.4	18.7	18.7	37.186	0	95.42	5107800000	105	0.620976	0.122992	0.342293	1.38126	1.77049	0.00402939	0.453883	3.93976	P62140
P62191	PSMC1	26S protease regulatory subunit 4	28.7166	28.6178	28.5235	27.4261	26.8662	27.1857	26.7249	26.7584	26.4464	-0.5161	0.0531417				+	+	FB-P_Ctrl;P-BF_Ctrl	13	13	13	38.2	38.2	38.2	49.184	0	97.626	4298100000	87	2.98141	0.000456621	-1.45998	-8.51455	4.19422	0	-1.97604	-17.4068	P62191
P62195	PSMC5	26S protease regulatory subunit 8	29.9428	29.9302	29.8241	29.591	29.4356	29.5192	29.0669	29.3554	29.3	-0.2745	0.0503976				+	+	FB-P_Ctrl;P-BF_Ctrl	18	18	17	58.1	58.1	55.2	45.626	0	323.31	12231000000	365	2.55127	0.00114033	-0.383751	-6.54923	2.62464	0.000671875	-0.658248	-6.853	P62195
P62241	RPS8	40S ribosomal protein S8	32.5672	32.5265	32.5256	32.1574	32.2918	32.3045	32.6035	32.6352	32.6976	0.3942	0.00194886				+	+	FB-P_Ctrl;P-BF_Ctrl	9	9	9	38.9	38.9	38.9	24.205	0	312.52	82881000000	721	2.38097	0.00149802	-0.288508	-5.8881	1.57508	0.00491407	0.105689	3.42727	P62241
P62244	RPS15A	40S ribosomal protein S15a	31.1156	30.9328	30.8613	30.5465	30.7087	30.7559	30.3215	30.5162	30.4198	-0.2512	0.0413718					+	P-BF_Ctrl	7	7	7	59.2	59.2	59.2	14.839	0	149.71	24763000000	350	1.41247	0.0104587	-0.299529	-3.03254	2.36792	0.00101781	-0.550701	-5.83986	P62244
P62249	RPS16	40S ribosomal protein S16	31.8399	31.1554	31.017	29.5357	29.5012	29.2799	29.9794	30.3945	30.2214	0.7595	0.00628887				+	+	FB-P_Ctrl;P-BF_Ctrl	10	10	10	49.3	49.3	49.3	16.445	0	84.246	26520000000	405	2.68647	0.000970874	-1.8985	-7.11845	1.80938	0.00384469	-1.13903	-4.04731	P62249
P62258	YWHAE	14-3-3 protein epsilon	30.3052	30.2822	30.2187	29.1115	28.9562	29.0503	29.047	28.8422	28.8843	-0.114833	0.210456				+	+	FB-P_Ctrl;P-BF_Ctrl	13	13	11	54.5	54.5	47.5	29.174	0	175.13	14458000000	276	4.72098	0	-1.22938	-23.6315	4.42343	0	-1.3442	-19.8872	P62258
P62263	RPS14	40S ribosomal protein S14	31.7744	31.7589	31.5132	31.1644	31.031	31.218	31.7156	31.6837	31.6753	0.553733	0.000625858				+		FB-P_Ctrl	10	10	10	41.7	41.7	41.7	16.273	0	279.09	46187000000	572	2.23829	0.00168881	-0.544357	-5.37782	0.0372021	1	0.0093797	0.109734	P62263
P62266	RPS23	40S ribosomal protein S23	31.1301	31.0176	30.9834	30.295	30.4322	30.4399	30.3039	30.5716	30.3642	0.0242	0.809036				+	+	FB-P_Ctrl;P-BF_Ctrl	3	3	3	16.1	16.1	16.1	15.807	0	17.291	25276000000	155	3.27171	0.000190476	-0.654683	-10.1283	2.61743	0.000666667	-0.630476	-6.82264	P62266
P62269	RPS18	40S ribosomal protein S18	29.6597	29.1101	28.9963	27.456	26.4749	26.4642	28.0479	28.5679	28.1303	1.45033	0.0166842				+	+	FB-P_Ctrl;P-BF_Ctrl	9	9	9	48	48	48	17.718	0	100.41	5231100000	140	2.49963	0.0012086	-2.45698	-6.34243	1.74153	0.00411897	-1.00669	-3.86093	P62269
P62273	RPS29	40S ribosomal protein S29	31.6516	31.5461	31.4941	28.995	29.4377	29.738	30.1633	30.5114	29.9773	0.8271	0.036132				+	+	FB-P_Ctrl;P-BF_Ctrl	2	2	2	33.9	33.9	33.9	6.6767	0	131.04	20364000000	87	3.22462	0.000183206	-2.17376	-9.84859	2.92873	0.000112676	-1.34661	-8.24842	P62273
P62277	RPS13	40S ribosomal protein S13	31.2778	29.9227	29.8291	28.2295	27.8812	27.9738	28.9629	29.1648	28.9226	0.9886	0.0015268				+	+	FB-P_Ctrl;P-BF_Ctrl	9	9	9	47.7	47.7	47.7	17.222	0	54.774	10262000000	239	2.07181	0.00233084	-2.31502	-4.82762	1.31064	0.00999771	-1.32642	-2.7981	P62277
P62280	RPS11	40S ribosomal protein S11	32.4711	32.2921	32.1864	30.9564	30.7222	30.531	30.901	31.3662	31.2545	0.437367	0.0789573				+	+	FB-P_Ctrl;P-BF_Ctrl	11	11	11	38	38	38	18.431	0	29.091	59141000000	303	3.35556	0.000213333	-1.58004	-10.645	2.66176	0.00059481	-1.14264	-7.0113	P62280
P62304	SNRPE	Small nuclear ribonucleoprotein E	28.5877	28.5083	28.4595	28.8477	28.6146	28.8071	28.9037	29.2423	29.5073	0.4613	0.0710453					+	P-BF_Ctrl	4	4	4	42.4	42.4	42.4	10.803	0	32.545	5267800000	137	1.37165	0.0112005	0.237966	2.93747	1.76143	0.00414913	0.699293	3.91497	P62304
P62310	LSM3	U6 snRNA-associated Sm-like protein LSm3	26.3757	26.2196	26.1782	28.1904	28.1503	28.064	28.1413	28.3734	28.0031	0.0377	0.758058				+	+	FB-P_Ctrl;P-BF_Ctrl	3	3	3	40.2	40.2	40.2	11.845	0	126.57	1515000000	41	4.92103	0	1.8771	26.532	3.99368	0	1.91481	15.4868	P62310
P62330	ARF6	ADP-ribosylation factor 6	26.0346	25.7946	25.7885	Not detected	25.5802	25.6708	25.2402	25.4488	25.4775	-0.236667	0.103641					+	P-BF_Ctrl	4	4	4	33.1	33.1	33.1	20.082	0	8.9708	835180000	37	0.957879	0.0368571	-0.247032	-2.24758	1.92788	0.00293447	-0.483709	-4.3874	P62330
P62333	PSMC6	26S protease regulatory subunit 10B	26.8765	26.7179	26.6475	26.4207	26.1641	26.1781	25.9304	26.107	26.2677	-0.1526	0.299622				+	+	FB-P_Ctrl;P-BF_Ctrl	10	10	10	34.7	34.7	34.7	44.172	0	102.87	1262000000	88	1.99585	0.00265707	-0.49298	-4.59142	2.25652	0.00136766	-0.645585	-5.44093	P62333
P62380	TBPL1	TATA box-binding protein-like protein 1	27.4003	27.3368	27.2673	29.6023	28.9118	29.0543	28.2505	29.248	29.272	-0.265967	0.53955				+	+	FB-P_Ctrl;P-BF_Ctrl	5	5	5	27.4	27.4	27.4	20.886	0	177.27	2616200000	86	3.01102	0.000468019	1.85465	8.66752	2.0278	0.00251732	1.58867	4.68969	P62380
P62424	RPL7A	60S ribosomal protein L7a	32.8452	32.805	32.7567	31.5828	31.4306	31.5038	32.272	32.4347	32.3015	0.830333	0.000238079				+	+	FB-P_Ctrl;P-BF_Ctrl	15	15	15	34.2	34.2	34.2	29.995	0	152.73	87688000000	613	4.85263	0	-1.29662	-25.5027	2.93825	0.000113341	-0.466272	-8.29596	P62424
P62491	RAB11A	Ras-related protein Rab-11A;Ras-related protein Rab-11B	27.3188	27.2752	27.2197	26.6027	26.5652	26.7133	26.7036	26.9569	26.7057	0.161667	0.164409				+	+	FB-P_Ctrl;P-BF_Ctrl	8	8	8	41.2	41.2	41.2	24.393	0	28.918	2183400000	67	3.58265	0	-0.644128	-12.1724	2.25326	0.00136327	-0.482468	-5.42961	P62491;Q15907
P62495	ETF1	Eukaryotic peptide chain release factor subunit 1	29.6298	29.5989	29.4979	28.652	28.6343	28.5944	28.3241	28.4457	28.1145	-0.332133	0.0277429				+	+	FB-P_Ctrl;P-BF_Ctrl	15	15	15	33.4	33.4	33.4	49.03	0	131.56	10048000000	249	4.58992	0	-0.948661	-21.9035	3.59257	0	-1.28077	-12.2437	P62495
P62701	RPS4X	40S ribosomal protein S4, X isoform	34.0923	33.049	32.9299	31.9137	32.083	31.9763	32.4492	32.6143	32.5494	0.546633	0.00136724				+		FB-P_Ctrl	14	14	14	47.1	47.1	47.1	29.597	0	110.25	1043400000000000	563	1.66864	0.00526536	-1.36606	-3.66705	1.03349	0.0226233	-0.819422	-2.20072	P62701;Q8TD47;P22090
P67775	PPP2CA	Serine/threonine-protein phosphatase 2A catalytic subunit alpha isoform;Serine/threonine-protein phosphatase 2A catalytic subunit beta isoform	26.1065	25.9432	25.8602	26.0821	25.9384	25.8983	25.6804	25.572	25.5272	-0.379733	0.00618976					+	P-BF_Ctrl	4	4	4	19.1	19.1	19.1	35.594	0	23.543	893090000	46	0.0105917	1	0.00293605	0.0321312	1.93529	0.00294076	-0.376783	-4.40933	P67775;P62714
P62750	RPL23A	60S ribosomal protein L23a	33.2418	33.1196	33.0464	31.6122	31.9599	31.7837	32.4699	32.5085	32.3956	0.672733	0.00312469				+	+	FB-P_Ctrl;P-BF_Ctrl	11	11	11	44.2	44.2	44.2	17.695	0	169.26	10600000000000	485	3.51588	0	-1.35068	-11.7029	3.29718	0	-0.677916	-10.2827	P62750
P62753	RPS6	40S ribosomal protein S6	31.6051	31.5636	31.5048	31.4174	31.5094	31.604	31.2927	31.2768	31.212	-0.249767	0.0135291					+	P-BF_Ctrl	10	10	10	23.3	23.3	23.3	28.68	0	207.08	42725000000	358	0.318112	0.487905	-0.0475292	-0.776683	2.83501	0.000107383	-0.297306	-7.79353	P62753
P62805	HIST1H4A	Histone H4	35.0563	34.9824	34.6656	33.9536	34.0927	33.9889	34.5914	34.4185	34.4503	0.475	0.00215763				+	+	FB-P_Ctrl;P-BF_Ctrl	13	13	13	65	65	65	11.367	0	180.66	3846600000000000	1261	2.66186	0.00108224	-0.889746	-7.01173	1.46782	0.00690408	-0.414715	-3.16395	P62805
P62826	RAN	GTP-binding nuclear protein Ran	33.3489	33.2321	33.131	32.3774	32.964	33.0015	32.2499	32.4053	32.5101	-0.392533	0.142974					+	P-BF_Ctrl	11	11	11	44.4	44.4	44.4	24.423	0	323.31	1252400000000000	899	1.01186	0.030655	-0.456366	-2.15617	3.0039	0	-0.848893	-8.63052	P62826
P62829	RPL23	60S ribosomal protein L23	31.4144	31.3731	31.187	30.8361	30.6029	30.3526	30.9269	30.8409	30.8865	0.287567	0.112465				+	+	FB-P_Ctrl;P-BF_Ctrl	6	6	6	37.9	37.9	37.9	14.865	0	30.302	32439000000	201	2.01796	0.0025974	-0.727582	-4.65924	2.39166	0.000926787	-0.440041	-5.92791	P62829
P62847	RPS24	40S ribosomal protein S24	30.6294	30.4135	30.3974	30.6103	30.2029	30.2434	30.2014	30.0611	29.8627	-0.310467	0.128866					+	P-BF_Ctrl	6	6	6	36.1	36.1	36.1	15.423	0	50.668	18158000000	260	0.355653	0.406629	-0.127875	-0.85466	1.62348	0.00461675	-0.438373	-3.55007	P62847
P62851	RPS25	40S ribosomal protein S25	31.9484	30.6349	30.6065	29.5618	29.2643	29.3576	30.0839	30.1825	29.9463	0.676333	0.00371731				+		FB-P_Ctrl	5	5	5	29.6	29.6	29.6	13.742	0	21.451	18514000000	185	1.68023	0.00515649	-1.66868	-3.69746	1.04063	0.0219808	-0.992393	-2.21548	P62851
P62854	RPS26	40S ribosomal protein S26;Putative 40S ribosomal protein S26-like 1	32.3657	31.9869	31.4972	30.8315	30.7799	30.9977	31.5153	31.9372	31.6192	0.820867	0.00455334				+		FB-P_Ctrl	3	3	3	33.9	33.9	33.9	13.015	0	20.735	43670000000	189	1.84842	0.00312012	-1.08024	-4.15723	0.388152	0.311649	-0.259398	-0.921114	P62854;Q5JNZ5
P62861	FAU	40S ribosomal protein S30	33.2952	32.8496	32.8431	32.1452	32.2904	32.0936	33.0198	33.5977	33.6481	1.24547	0.00405051				+		FB-P_Ctrl	3	3	3	20.3	20.3	20.3	6.6478	0	32.001	86450000000	446	2.15506	0.0022526	-0.819565	-5.09696	0.782585	0.052997	0.4259	1.69679	P62861
P62877	RBX1	E3 ubiquitin-protein ligase RBX1;E3 ubiquitin-protein ligase RBX1, N-terminally processed	25.5507	25.4399	25.2841	26.131	25.7054	25.8415	Not detected	Not detected	25.4222	-0.470433	#DIV/0!				+		FB-P_Ctrl	2	2	2	17.6	17.6	17.6	12.274	0	60.721	512590000	52	1.47159	0.0089727	0.467722	3.17299	0	1	-0.00274022	0	P62877
P62879	GNB2	Guanine nucleotide-binding protein G(I)/G(S)/G(T) subunit beta-2;Guanine nucleotide-binding protein subunit beta-4	27.8367	27.7285	27.7262	26.7222	26.5855	26.498	26.706	27.0706	25.895	-0.0447	0.905477				+	+	FB-P_Ctrl;P-BF_Ctrl	6	6	2	15.6	15.6	4.1	37.331	0	30.777	2862000000	65	4.00001	0	-1.16192	-15.5442	1.58576	0.00481551	-1.2066	-3.45414	P62879;Q9HAV0
P62888	RPL30	60S ribosomal protein L30	28.3419	28.314	28.2032	28.1434	27.9986	28.2118	28.6206	28.4735	28.5172	0.419167	0.005401					+	P-BF_Ctrl	3	3	3	17.4	17.4	17.4	12.784	0	13.976	4779300000	90	1.04384	0.0279735	-0.168423	-2.22212	1.83681	0.00353297	0.250755	4.12434	P62888
Q59GN2	RPL39P5	Putative 60S ribosomal protein L39-like 5;60S ribosomal protein L39	29.1189	28.9101	28.6591	Not detected	26.116	26.1812	Not detected	Not detected	Not detected	#DIV/0!	#DIV/0!				+		FB-P_Ctrl	1	1	1	19.6	19.6	19.6	6.3225	0	6.9319	3213100000	48	3.26303	0.000188976	-2.74746	-15.8527	0	1	Not detected	0	Q59GN2;P62891
P62906	RPL10A	60S ribosomal protein L10a	29.9098	29.8958	29.7724	29.1595	29.113	28.99	29.7953	29.9406	29.7094	0.7276	0.00099154				+		FB-P_Ctrl	6	6	6	26.3	26.3	26.3	24.831	0	27.287	11603000000	163	3.49368	0	-0.771835	-11.5507	0.21398	0.741051	-0.0442797	-0.550985	P62906
P62910	RPL32	60S ribosomal protein L32	32.2654	31.8915	31.8167	31.0117	31.2852	31.0963	31.9815	32.262	32.1237	0.991333	0.0009766				+		FB-P_Ctrl	9	9	9	37	37	37	15.86	0	49.636	50512000000	302	2.23174	0.00167964	-0.860142	-5.35527	0.337205	0.423144	0.131214	0.816519	P62910
P62913	RPL11	60S ribosomal protein L11	31.1416	31.0131	30.9432	30.8961	30.8219	30.5854	30.2955	30.2212	30.2384	-0.5161	0.00585681					+	P-BF_Ctrl	5	5	5	29.2	29.2	29.2	20.252	0	114.21	26903000000	187	1.13005	0.0215674	-0.264847	-2.4029	3.63335	0	-0.780917	-12.5409	P62913
P62917	RPL8	60S ribosomal protein L8	32.8384	32.7775	32.6523	30.3283	30.6369	30.5392	31.1731	31.4222	31.4766	0.855833	0.00279329				+	+	FB-P_Ctrl;P-BF_Ctrl	10	10	10	27.2	27.2	27.2	28.024	0	109.43	67902000000	281	4.53478	0	-2.25462	-21.2145	3.68335	0	-1.39879	-12.9147	P62917
P62937	PPIA	Peptidyl-prolyl cis-trans isomerase A;Peptidyl-prolyl cis-trans isomerase A, N-terminally processed	29.4619	29.1621	29.0444	28.1012	27.933	27.9817	28.5743	28.4206	28.2426	0.4072	0.0196475				+	+	FB-P_Ctrl;P-BF_Ctrl	7	7	7	35.8	35.8	35.8	18.012	0	53.501	6108400000	106	3.09014	0.000159204	-1.21751	-9.0888	2.17489	0.00184112	-0.810307	-5.16279	P62937
P62993	GRB2	Growth factor receptor-bound protein 2	27.0289	26.8908	26.7265	25.4218	25.8388	25.6986	25.7344	25.6528	Not detected	0.0405333	0.817553				+	+	FB-P_Ctrl;P-BF_Ctrl	5	5	5	23.5	23.5	23.5	25.206	0	8.3315	1049500000	39	2.91216	0.0004329	-1.22897	-8.16629	2.69342	0.000517454	-1.18844	-10.1701	P62993
P62995	TRA2B	Transformer-2 protein homolog beta	27.8331	27.5877	27.3282	Not detected	26.4122	26.6678	26.8298	26.9079	26.8425	0.320067	0.0496058				+	+	FB-P_Ctrl;P-BF_Ctrl	5	5	5	21.2	21.2	21.2	33.665	0	16.268	2118300000	68	1.7995	0.00365371	-1.04301	-4.94486	2.09202	0.00210909	-0.72291	-4.89197	P62995
P63010	AP2B1	AP-2 complex subunit beta	28.4724	28.4708	28.4462	27.5095	28.1699	28.0899	27.258	27.1267	27.1229	-0.7539	0.023944					+	P-BF_Ctrl	22	22	13	30.1	30.1	18.9	104.55	0	93.036	5021000000	162	1.21835	0.0169241	-0.540012	-2.59312	5.05203	0	-1.29392	-28.6197	P63010
P63092	GNAS	Guanine nucleotide-binding protein G(s) subunit alpha isoforms short;Guanine nucleotide-binding protein G(s) subunit alpha isoforms XLas	27.5772	27.4003	27.3718	26.2067	26.3137	26.1479	26.5542	26.488	26.5725	0.315467	0.00454655				+	+	FB-P_Ctrl;P-BF_Ctrl	7	7	6	19.5	19.5	16.8	45.664	0	15.648	2295400000	94	3.96644	0	-1.22697	-15.2425	3.71791	0	-0.911528	-13.1793	P63092;Q5JWF2;P11488;P19087;P09471;A8MTJ3
P63104	YWHAZ	14-3-3 protein zeta/delta	28.2949	28.1707	27.8619	26.7891	26.992	26.9562	26.9406	26.6206	26.7768	-0.1331	0.298748				+	+	FB-P_Ctrl;P-BF_Ctrl	10	8	7	45.7	38.4	34.7	27.745	0	219.54	2755700000	111	2.95134	0.000444444	-1.19675	-8.36168	2.95755	0.000114695	-1.32985	-8.39305	P63104
P63151	PPP2R2A	Serine/threonine-protein phosphatase 2A 55 kDa regulatory subunit B alpha isoform	29.7571	29.745	29.6631	28.7662	29.0606	29.437	29.0304	29.1377	29.24	0.0481	0.824624				+	+	FB-P_Ctrl;P-BF_Ctrl	14	14	9	44.3	44.3	31.8	51.691	0	191.56	11236000000	315	1.49423	0.00868682	-0.633754	-3.22769	3.01688	0	-0.585667	-8.69811	P63151;Q00005
P63165	SUMO1	Small ubiquitin-related modifier 1;Small ubiquitin-related modifier	29.018	28.8337	28.8109	28.0742	27.1427	27.6734	27.6122	27.2141	27.2627	-0.2671	0.420021				+	+	FB-P_Ctrl;P-BF_Ctrl	3	3	3	34.7	34.7	34.7	11.557	0	8.1473	5366100000	78	1.97536	0.00271429	-1.25745	-4.52921	3.37598	0	-1.52457	-10.7745	P63165;G2XKQ0
P63220	RPS21	40S ribosomal protein S21	27.4091	27.3669	27.3477	27.3525	27.2019	27.3438	26.7301	26.7873	26.8333	-0.515833	0.000838355					+	P-BF_Ctrl	5	5	5	53	53	53	9.1113	0	94.888	2042100000	86	0.653693	0.107206	-0.0752138	-1.44498	4.14676	0	-0.591012	-16.9324	P63220
P63241	EIF5A	Eukaryotic translation initiation factor 5A-1;Eukaryotic translation initiation factor 5A-1-like	32.098	31.6581	31.5677	29.8558	30.539	30.0477	29.6306	29.8389	29.872	-0.367	0.166074				+	+	FB-P_Ctrl;P-BF_Ctrl	8	8	8	35.1	35.1	35.1	16.832	0	323.31	29705000000	397	2.47086	0.00159077	-1.62716	-6.22969	3.41937	0	-1.99416	-11.0547	P63241;Q6IS14;Q9GZV4
P63244	GNB2L1	Guanine nucleotide-binding protein subunit beta-2-like 1;Guanine nucleotide-binding protein subunit beta-2-like 1, N-terminally processed	31.6173	31.5028	31.4493	30.4643	30.137	30.3637	30.2769	30.4162	30.5213	0.0831333	0.526282				+	+	FB-P_Ctrl;P-BF_Ctrl	13	13	13	46.7	46.7	46.7	35.076	0	323.31	36323000000	616	3.41842	0.000231884	-1.20149	-11.0485	3.68684	0	-1.11836	-12.9412	P63244
P63279	UBE2I	SUMO-conjugating enzyme UBC9	28.8085	28.0861	28.0039	27.6231	27.0505	27.1944	27.5067	27.5067	27.6322	0.2592	0.216917				+	+	FB-P_Ctrl;P-BF_Ctrl	5	5	5	27.2	27.2	27.2	18.007	0	9.9239	3676700000	110	1.51528	0.00832812	-1.01017	-3.27899	1.35514	0.0092853	-0.75098	-2.89944	P63279
P67809	YBX1	Nuclease-sensitive element-binding protein 1	31.6329	31.4845	31.341	30.167	30.2738	29.9959	30.9802	30.6496	30.8914	0.694833	0.0055398				+	+	FB-P_Ctrl;P-BF_Ctrl	17	17	11	67	67	59.6	35.924	0	323.31	33209000000	502	3.48231	0	-1.34059	-11.4735	2.11706	0.00197554	-0.645732	-4.97261	P67809;Q9Y2T7
P67870	CSNK2B	Casein kinase II subunit beta	28.7342	28.675	28.6512	28.1929	28.4119	28.4458	28.3416	27.9565	27.8563	-0.298733	0.149665				+	+	FB-P_Ctrl;P-BF_Ctrl	4	4	4	22.3	22.3	22.3	24.942	0	106.43	5144400000	80	1.81195	0.00334118	-0.336596	-4.05447	1.87604	0.00336446	-0.63533	-4.23625	P67870
P68104	EEF1A1	Elongation factor 1-alpha 1;Putative elongation factor 1-alpha-like 3	35.2499	35.2473	35.2467	34.0533	34.2298	34.2473	33.8075	34.0313	33.9858	-0.235267	0.0632065				+	+	FB-P_Ctrl;P-BF_Ctrl	18	18	9	44.2	44.2	21.2	50.14	0	323.31	5493600000000000	2127	4.18194	0	-1.07118	-17.2829	4.35626	0	-1.30642	-19.1265	P68104;Q5VTE0
P68363	TUBA1B	Tubulin alpha-1B chain;Tubulin alpha-4A chain;Tubulin alpha-8 chain	34.5226	34.4612	34.3931	33.7577	33.7075	33.4793	33.0026	33.2303	33.0805	-0.5437	0.00746671				+	+	FB-P_Ctrl;P-BF_Ctrl	22	22	0	50.6	50.6	0	50.151	0	323.31	3183500000000000	2474	3.01231	0.00046875	-0.810801	-8.67427	4.22182	0	-1.35449	-17.6886	P68363;P68366;Q9NY65;Q9H853
P68371	TUBB4B	Tubulin beta-4B chain	30.6803	30.3055	30.0953	29.723	29.3246	29.2278	29.2912	29.1079	29.1221	-0.2514	0.196903				+	+	FB-P_Ctrl;P-BF_Ctrl	19	5	1	51.9	19.3	2.7	49.83	0	177.71	16933000000	268	1.82545	0.00322906	-0.935246	-4.0923	2.55377	0.000647834	-1.18665	-6.55938	P68371
Q71DI3	HIST2H3A	Histone H3.2;Histone H3.1t;Histone H3.3;Histone H3.1;Histone H3.3C	35.9107	35.8629	35.8099	33.5144	33.6034	33.6383	34.7145	34.8586	34.4975	1.10483	0.000577045				+	+	FB-P_Ctrl;P-BF_Ctrl	5	5	2	25	25	8.1	15.388	0	40.116	5713400000000000	430	5.96376	0	-2.27577	-48.4361	3.37263	0	-1.17097	-10.7532	Q71DI3;Q16695;P84243;P68431;Q6NXT2
P78316	NOP14	Nucleolar protein 14	27.106	26.9083	26.8486	25.998	25.6714	26.1322	26.6366	26.3506	26.6174	0.601	0.02194				+	+	FB-P_Ctrl;P-BF_Ctrl	14	14	14	19.7	19.7	19.7	97.667	0	42.245	1269800000	75	2.53492	0.00123246	-1.02042	-6.48316	1.59418	0.00474687	-0.419455	-3.47542	P78316
P78318	IGBP1	Immunoglobulin-binding protein 1	28.2208	28.1738	28.0759	28.5852	28.5063	28.5207	28.3642	28.4466	28.2428	-0.1862	0.0436425				+		FB-P_Ctrl	12	12	12	41	41	41	39.221	0	148.24	4321000000	140	2.82633	0.000669344	0.380565	7.75258	1.25052	0.0120316	0.194392	2.66382	P78318
P78344	EIF4G2	Eukaryotic translation initiation factor 4 gamma 2	29.3213	29.279	29.2425	28.9255	29.0288	29.1297	28.5868	28.5614	28.4656	-0.490067	0.0021383				+	+	FB-P_Ctrl;P-BF_Ctrl	27	27	27	35	35	35	102.36	0	159.84	9441700000	323	1.79316	0.00364035	-0.252923	-4.00219	4.16678	0	-0.743008	-17.131	P78344
P78345	RPP38	Ribonuclease P protein subunit p38	26.3317	26.1958	25.9242	25.5691	25.4654	25.5126	26.0967	Not detected	25.5742	0.31975	0.205657				+		FB-P_Ctrl	6	6	6	23	23	23	31.834	0	25.829	809410000	66	2.16842	0.00216973	-0.634843	-5.14123	0.530927	0.149788	-0.3151	-1.26727	P78345
P78346	RPP30	Ribonuclease P protein subunit p30	28.1652	28.0435	27.9902	28.3682	28.3604	28.3699	28.0297	27.6661	27.9833	-0.473133	0.0143801				+		FB-P_Ctrl	9	9	9	49.6	49.6	49.6	29.321	0	83.233	3814500000	136	2.35132	0.00147042	0.299898	5.77895	0.62096	0.10319	-0.173253	-1.38123	P78346
P78347	GTF2I	General transcription factor II-I	29.06	29.0599	28.962	29.5989	29.513	29.6771	29.6462	29.5581	29.5099	-0.0249333	0.707925				+	+	FB-P_Ctrl;P-BF_Ctrl	31	31	31	36.8	36.8	36.8	112.42	0	269.58	7904400000	334	3.2313	0.000184615	0.569038	9.88784	3.34097	0	0.544104	10.5534	P78347;Q86UP8;Q6EKJ0
P78356	PIP4K2B	Phosphatidylinositol 5-phosphate 4-kinase type-2 beta	25.8505	25.7348	25.7247	25.784	25.3334	25.0049	25.1099	24.7927	24.7307	-0.496333	0.122965					+	P-BF_Ctrl	5	3	3	16.1	9.9	9.9	47.377	0	41.567	608680000	39	0.797337	0.0626626	-0.39589	-1.7258	2.70166	0.000293388	-0.892255	-7.18502	P78356
P78362	SRPK2	SRSF protein kinase 2;SRSF protein kinase 2 N-terminal;SRSF protein kinase 2 C-terminal	25.1352	24.8841	24.854	Not detected	24.0458	24.6601	24.3557	24.262	24.3994	-0.0139167	0.956471					+	P-BF_Ctrl	4	3	3	8.1	6.8	6.8	77.526	0.00030248	4.2163	271310000	16	1.0027	0.0317749	-0.604836	-2.36023	2.49345	0.000800731	-0.618758	-6.31808	P78362;Q9UPE1
P78364	PHC1	Polyhomeotic-like protein 1	23.9115	23.6523	#NUM!	24.6507	24.1823	24.3364	25.3843	25.0737	25.4656	0.918067	0.00731109					+	P-BF_Ctrl	4	4	4	8.9	8.9	8.9	105.53	0	18.058	126890000	14	1.23993	0.0152742	0.607907	3.00253	2.44929	0.000780749	1.52596	8.38799	P78364
P78371	CCT2	T-complex protein 1 subunit beta	31.2093	31.0135	30.934	30.9351	30.9109	30.9873	30.5931	30.6217	30.5901	-0.3428	0.000156034					+	P-BF_Ctrl	30	30	30	64.9	64.9	64.9	57.488	0	323.31	32992000000	680	0.564304	0.155382	-0.107803	-1.27071	2.26431	0.00137097	-0.450596	-5.46808	P78371
P78406	RAE1	mRNA export factor	27.3054	27.1508	27.1157	27.4561	27.4582	27.3939	27.436	26.8735	27.1338	-0.2883	0.153382				+		FB-P_Ctrl	7	7	7	23.4	23.4	23.4	40.968	0	120.93	2074900000	95	1.77808	0.00385714	0.245383	3.96059	0.0883406	0.95305	-0.0429115	-0.248559	P78406
P78417	GSTO1	Glutathione S-transferase omega-1	28.0195	27.926	27.8816	27.3445	27.7029	27.6094	27.0186	27.0086	26.8748	-0.584933	0.0074743				+	+	FB-P_Ctrl;P-BF_Ctrl	8	8	8	33.2	33.2	33.2	27.566	0	18.753	3077800000	115	1.56383	0.00694235	-0.390086	-3.39907	4.02975	0	-0.975023	-15.8162	P78417
P78527	PRKDC	DNA-dependent protein kinase catalytic subunit	31.3946	31.2613	31.232	30.099	29.7558	29.8258	29.9496	29.9205	29.9394	0.0429667	0.703479				+	+	FB-P_Ctrl;P-BF_Ctrl	101	101	101	28.7	28.7	28.7	469.08	0	323.31	34245000000	1081	3.57048	0	-1.40244	-12.0856	4.93756	0	-1.35942	-26.7868	P78527
P82650	MRPS22	28S ribosomal protein S22, mitochondrial	26.7629	26.3454	26.2985	26.4823	25.7607	25.8204	24.9828	25.1272	25.3563	-0.8657	0.0275808					+	P-BF_Ctrl	7	7	7	23.3	23.3	23.3	41.28	0	14.972	933470000	28	0.74971	0.0744495	-0.447813	-1.63233	2.69693	0.000518519	-1.31352	-7.16424	P82650
P82930	MRPS34	28S ribosomal protein S34, mitochondrial	25.5982	25.3153	25.2868	Not detected	23.3231	23.7051	24.3162	24.6795	24.5027	0.985367	0.015265				+	+	FB-P_Ctrl;P-BF_Ctrl	4	4	4	28	28	28	25.65	0	10.24	444550000	43	2.65139	0.0012213	-1.88601	-9.83967	2.47168	0.000791328	-0.900662	-6.23288	P82930
P82979	SARNP	SAP domain-containing ribonucleoprotein	28.7898	28.775	28.665	28.2937	28.0367	28.2619	27.9765	28.1489	27.9591	-0.169267	0.169251				+	+	FB-P_Ctrl;P-BF_Ctrl	7	7	7	38.6	38.6	38.6	23.671	0	103.12	4717300000	95	2.42866	0.00154379	-0.545827	-6.0673	3.23323	0	-0.715105	-9.8992	P82979
P83731	RPL24	60S ribosomal protein L24	31.1441	30.9864	30.8391	29.6098	29.7124	29.7759	30.6361	30.8226	30.7261	1.0289	0.000142341				+		FB-P_Ctrl	3	3	3	19.1	19.1	19.1	17.779	0	11.217	28001000000	256	3.67353	0	-1.29049	-12.8405	1.19105	0.0143596	-0.261581	-2.53371	P83731
P83916	CBX1	Chromobox protein homolog 1	28.3548	28.353	28.0766	28.5879	28.5456	28.529	28.1183	28.3478	28.2151	-0.3271	0.00893886				+		FB-P_Ctrl	4	3	3	24.3	15.7	15.7	21.418	0	39.042	2866400000	67	1.44577	0.0094239	0.29267	3.11124	0.109163	0.924107	-0.0343812	-0.301941	P83916
P84090	ERH	Enhancer of rudimentary homolog	30.0975	30.0099	29.8278	28.112	28.6771	28.7343	29.0151	28.5852	28.696	0.257633	0.337653				+	+	FB-P_Ctrl;P-BF_Ctrl	3	3	3	25	25	25	12.259	0	78.998	8596100000	80	2.63001	0.00120702	-1.47056	-6.87571	2.88073	0.000109464	-1.21294	-8.01253	P84090
P84098	RPL19	60S ribosomal protein L19	32.5404	31.7817	31.7284	30.7782	30.7	30.9366	31.6961	31.7404	31.8586	0.9601	0.00034736				+		FB-P_Ctrl	8	8	8	31.1	31.1	31.1	23.466	0	257.74	45321000000	252	1.95475	0.00276056	-1.21192	-4.46725	0.39957	0.293262	-0.251803	-0.944263	P84098
P84103	SRSF3	Serine/arginine-rich splicing factor 3	30.0123	29.8009	29.6138	28.5512	28.5168	28.7841	28.9699	29.0077	28.7888	0.304767	0.0474311				+	+	FB-P_Ctrl;P-BF_Ctrl	8	8	7	40.9	40.9	40.9	19.329	0	73.016	9189500000	182	2.95176	0.000445104	-1.19164	-8.36381	2.57459	0.000655863	-0.886842	-6.64452	P84103
P98170	XIAP	E3 ubiquitin-protein ligase XIAP	29.62	29.5344	29.5049	29.7398	29.8601	29.8197	29.7033	29.6055	29.7907	-0.1067	0.1714				+		FB-P_Ctrl	19	19	19	43.5	43.5	43.5	56.684	0	323.31	11573000000	375	2.16494	0.00215652	0.253394	5.12967	1.08307	0.0195866	0.146708	2.30384	P98170
P98175	RBM10	RNA-binding protein 10	29.5206	29.3722	29.3597	30.4501	30.4398	30.6043	30.4318	30.2537	30.4417	-0.122333	0.205499				+	+	FB-P_Ctrl;P-BF_Ctrl	29	29	28	44.1	44.1	43	103.53	0	323.31	10522000000	294	3.88914	0	1.08057	14.5695	3.55498	0	0.958275	11.9757	P98175
P99999	CYCS	Cytochrome c	32.9108	32.7672	32.6952	30.7705	31.7121	31.4191	31.4351	32.2871	31.909	0.5765	0.195825				+	+	FB-P_Ctrl;P-BF_Ctrl	11	11	11	62.9	62.9	62.9	11.749	0	223.75	70682000000	491	2.19314	0.00184369	-1.49049	-5.22396	1.63958	0.00444614	-0.913989	-3.59153	P99999;CON__P62894
Q00013	MPP1	55 kDa erythrocyte membrane protein	26.8707	26.8404	26.6321	27.6369	27.9317	27.5258	26.814	27.2684	27.1561	-0.618633	0.02758				+		FB-P_Ctrl	11	11	11	32	32	32	52.296	0	38.747	1564700000	82	2.52382	0.00122842	0.917049	6.43861	0.892533	0.0354004	0.298432	1.91453	Q00013
Q00325	SLC25A3	Phosphate carrier protein, mitochondrial	29.4141	29.3998	29.3514	27.3051	27.5957	27.4659	26.6866	27.5266	27.4447	-0.236267	0.446726				+	+	FB-P_Ctrl;P-BF_Ctrl	9	9	9	25.7	25.7	25.7	40.094	0	81.445	6282500000	137	4.63131	0	-1.93284	-22.4354	2.89694	0.000110599	-2.16912	-8.09148	Q00325
Q00341	HDLBP	Vigilin	31.3636	31.3572	31.3502	31.1091	30.8753	30.9673	30.1027	29.883	29.9913	-0.991567	0.000438048				+	+	FB-P_Ctrl;P-BF_Ctrl	53	53	53	50.2	50.2	50.2	141.45	0	323.31	42193000000	956	2.26731	0.00151571	-0.373123	-5.47858	4.5558	0	-1.36464	-21.4746	Q00341
Q00535	CDK5	Cyclin-dependent-like kinase 5	25.9	25.774	25.4807	Not detected	24.1351	24.7746	Not detected	Not detected	Not detected	#DIV/0!	#DIV/0!				+		FB-P_Ctrl	7	6	6	26	23.3	23.3	33.304	0	6.6838	557890000	22	1.66168	0.00523248	-1.26335	-4.39772	0	1	Not detected	0	Q00535
Q00577	PURA	Transcriptional activator protein Pur-alpha	25.9198	25.885	25.8257	Not detected	25.3741	25.3709	25.2233	25.2684	25.511	-0.0382667	0.761887				+	+	FB-P_Ctrl;P-BF_Ctrl	4	4	4	27	27	27	34.91	0	51.412	777800000	51	3.12187	0.000164103	-0.504316	-14.2086	2.35843	0.0010118	-0.54261	-5.80497	Q00577
Q00610	CLTC	Clathrin heavy chain 1	30.0544	29.5656	29.5257	27.6115	28.2455	28.3223	28.445	28.5573	28.4489	0.423967	0.136755				+	+	FB-P_Ctrl;P-BF_Ctrl	41	41	41	31.2	31.2	31.2	191.61	0	169.54	9619700000	329	2.3753	0.00148773	-1.65545	-5.86712	2.67796	0.000509606	-1.23151	-7.08139	Q00610;P53675
Q00688	FKBP3	Peptidyl-prolyl cis-trans isomerase FKBP3	31.8882	31.6154	31.5069	29.9457	29.9822	29.8985	30.5806	30.806	30.6171	0.725767	0.000603707				+	+	FB-P_Ctrl;P-BF_Ctrl	13	13	13	40.2	40.2	40.2	25.177	0	99.372	28766000000	344	3.927	0	-1.728	-14.8954	2.7769	0.000203243	-1.00223	-7.52292	Q00688
Q00839	HNRNPU	Heterogeneous nuclear ribonucleoprotein U	35.005	34.842	34.8372	33.7538	33.9261	34.008	34.4338	34.5119	34.5005	0.5861	0.00174255				+	+	FB-P_Ctrl;P-BF_Ctrl	29	29	29	33.5	33.5	33.5	90.583	0	323.31	3625700000000000	1869	3.3698	0.000220183	-0.998739	-10.7352	2.62193	0.000669912	-0.412649	-6.84157	Q00839
Q01081	U2AF1	Splicing factor U2AF 35 kDa subunit	30.0519	29.8917	29.8658	28.7979	29.0911	29.2394	29.7205	29.4756	29.5573	0.541667	0.0217494				+	+	FB-P_Ctrl;P-BF_Ctrl	5	5	5	22.1	22.1	22.1	27.872	0	172.23	11491000000	146	2.48512	0.00150265	-0.89369	-6.28535	1.71982	0.00408656	-0.352027	-3.8025	Q01081;Q8WU68
Q01105	SET	Protein SET;Protein SETSIP	31.0851	30.934	30.8849	30.4801	30.6642	30.5683	30.1495	29.9858	30.2965	-0.426933	0.0149341				+	+	FB-P_Ctrl;P-BF_Ctrl	9	9	9	37.9	37.9	37.9	33.488	0	156.38	21711000000	239	2.1083	0.00237025	-0.397146	-4.94427	2.79907	0.000105033	-0.824074	-7.62515	Q01105;P0DME0
Q01130	SRSF2	Serine/arginine-rich splicing factor 2;Serine/arginine-rich splicing factor 8	27.3295	27.2477	27.0961	26.6626	26.3195	26.4746	26.4337	26.3423	26.2539	-0.142267	0.272698				+	+	FB-P_Ctrl;P-BF_Ctrl	4	4	4	21.7	21.7	21.7	25.476	0	38.813	1985100000	113	2.44562	0.0015645	-0.738849	-6.13213	3.29388	0	-0.881121	-10.2626	Q01130;Q9BRL6
Q01167	FOXK2	Forkhead box protein K2	26.0929	25.9766	25.8799	27.3905	27.246	27.0719	27.5145	26.8917	27.1674	-0.0449333	0.835151				+	+	FB-P_Ctrl;P-BF_Ctrl	10	10	10	22.3	22.3	22.3	69.061	0	14.794	1097000000	44	3.45814	0	1.25303	11.3109	2.50015	0.000801464	1.20808	6.3445	Q01167
Q01484	ANK2	Ankyrin-2	28.6586	28.2336	28.2115	27.4373	27.2274	27.1064	26.8598	25.9768	26.0683	-0.9554	0.0322209				+	+	FB-P_Ctrl;P-BF_Ctrl	22	18	17	8.7	7.4	7.2	433.71	0	85.638	4442900000	174	2.50414	0.00121121	-1.11088	-6.3603	2.54953	0.000645403	-2.06629	-6.54218	Q01484
Q01518	CAP1	Adenylyl cyclase-associated protein 1	27.8647	27.7183	27.6761	27.1861	26.8516	26.9545	26.6773	26.0726	25.9728	-0.7565	0.0350124				+	+	FB-P_Ctrl;P-BF_Ctrl	10	10	10	31.6	31.6	31.6	51.901	0	62.929	2904000000	103	2.56736	0.00116216	-0.75562	-6.61486	2.57585	0.000656489	-1.5121	-6.64968	Q01518;P40123
Q01543	FLI1	Friend leukemia integration 1 transcription factor	25.4924	25.3747	24.8129	Not detected	24.3198	24.7748	24.2016	24.2343	24.2848	-0.307067	0.172962					+	P-BF_Ctrl	4	4	4	17.9	17.9	17.9	50.981	0	11.849	259840000	12	0.908826	0.0423516	-0.679345	-2.12701	2.02267	0.00257562	-0.986393	-4.6738	Q01543
Q01650	SLC7A5	Large neutral amino acids transporter small subunit 1	27.3967	27.3685	27.2482	24.8465	Not detected	Not detected	24.8462	Not detected	24.4989	-0.17395	#DIV/0!					+	P-BF_Ctrl	4	4	4	10.8	10.8	10.8	55.01	0	30.416	1526400000	64	0	0.979851	-2.49134	0	3.47962	0	-2.66526	-18.745	Q01650;Q9UM01;Q92536
Q01813	PFKP	ATP-dependent 6-phosphofructokinase, platelet type	28.6925	28.2817	28.24	26.8149	26.3099	26.5493	26.285	27.072	27.3244	0.335767	0.385931				+	+	FB-P_Ctrl;P-BF_Ctrl	19	16	16	27.2	22.4	22.4	85.595	0	55.022	4306000000	167	3.07338	0.000157119	-1.8467	-8.99802	1.92653	0.00293238	-1.51094	-4.38342	Q01813
Q01844	EWSR1	RNA-binding protein EWS	30.1991	30.1945	30.1871	29.0584	28.9976	28.7045	29.5345	29.3448	29.2927	0.4705	0.0233005				+	+	FB-P_Ctrl;P-BF_Ctrl	6	6	6	12.2	12.2	12.2	68.477	0	271.67	11932000000	273	3.50815	0	-1.27337	-11.6497	3.39847	0	-0.802873	-10.9189	Q01844
Q01968	OCRL	Inositol polyphosphate 5-phosphatase OCRL-1	27.9747	27.9294	27.8908	27.5678	27.6132	27.2321	26.7137	26.2839	26.7086	-0.9023	0.00838914				+	+	FB-P_Ctrl;P-BF_Ctrl	20	20	20	24.9	24.9	24.9	104.2	0	45.443	3532500000	119	1.70279	0.00476379	-0.460585	-3.75708	3.15231	0	-1.3629	-9.43304	Q01968
Q02241	KIF23	Kinesin-like protein KIF23	28.4575	28.4073	28.2832	28.8167	29.0975	29.0634	29.0437	29.06	28.9808	0.0356333	0.717386				+	+	FB-P_Ctrl;P-BF_Ctrl	18	18	18	28.3	28.3	28.3	110.06	0	175.16	5213700000	176	2.39709	0.001516	0.609853	5.9482	3.45614	0	0.645514	11.2976	Q02241
Q02543	RPL18A	60S ribosomal protein L18a	31.0267	30.997	30.947	28.3738	29.0466	29.1492	30.0154	30.5093	30.1981	1.3844	0.00806144				+	+	FB-P_Ctrl;P-BF_Ctrl	6	6	6	25	25	25	20.762	0	9.8863	20060000000	175	3.02363	0.000473186	-2.13368	-8.73348	2.16542	0.00183114	-0.749273	-5.13126	Q02543
Q02790	FKBP4	Peptidyl-prolyl cis-trans isomerase FKBP4;Peptidyl-prolyl cis-trans isomerase FKBP4, N-terminally processed	28.9917	28.8971	28.8772	27.641	27.5743	27.5166	27.7023	27.6652	27.8195	0.1517	0.0612518				+	+	FB-P_Ctrl;P-BF_Ctrl	16	16	16	48.6	48.6	48.6	51.804	0	83.725	5632100000	160	4.93102	0	-1.34469	-26.6858	4.47011	0	-1.19303	-20.4333	Q02790
Q02878	RPL6	60S ribosomal protein L6	33.3445	33.1542	33.0959	31.3635	31.6823	31.6132	32.0139	32.2394	32.151	0.581767	0.00762865				+	+	FB-P_Ctrl;P-BF_Ctrl	18	18	18	46.2	46.2	46.2	32.728	0	323.31	1036700000000000	728	3.7501	0	-1.64523	-13.4305	3.35908	0	-1.06344	-10.6672	Q02878
Q02880	TOP2B	DNA topoisomerase 2-beta	26.3432	26.2032	26.1009	25.3863	25.8599	25.2551	25.292	25.6529	25.4901	-0.0221	0.921717				+	+	FB-P_Ctrl;P-BF_Ctrl	20	11	11	14.4	8.9	8.9	183.26	0	31.984	847700000	46	1.65725	0.00522161	-0.715281	-3.63734	2.3741	0.00102302	-0.737413	-5.86267	Q02880
Q02952	AKAP12	A-kinase anchor protein 12	28.9548	28.8925	28.8019	25.807	26.1835	26.4221	24.3984	Not detected	25.2708	-1.30293	0.0469121				+	+	FB-P_Ctrl;P-BF_Ctrl	20	20	20	17.9	17.9	17.9	191.48	0	251.12	5073300000	155	3.92563	0	-2.74553	-14.8835	2.93257	0.000113074	-4.04845	-12.2626	Q02952
Q02978	SLC25A11	Mitochondrial 2-oxoglutarate/malate carrier protein	29.7165	29.6442	29.6332	28.8969	29.0151	28.9014	28.6783	29.2008	29.1356	0.0671	0.7114				+	+	FB-P_Ctrl;P-BF_Ctrl	14	14	14	52.9	52.9	52.9	34.061	0	189.66	11500000000	257	4.00304	0	-0.726811	-15.5717	1.77918	0.00397317	-0.659731	-3.96363	Q02978
Q03001	DST	Dystonin	27.7013	27.6713	27.6445	26.4611	Not detected	25.7175	25.3632	Not detected	25.265	-0.7752	0.174678				+	+	FB-P_Ctrl;P-BF_Ctrl	23	23	22	4.1	4.1	3.9	860.65	0	60.238	2240100000	99	1.9695	0.00277577	-1.58313	-5.69626	4.89684	0	-2.35831	-55.7962	Q03001
Q03111	MLLT1	Protein ENL	27.0281	26.8559	26.6894	26.2502	26.4943	26.3224	25.7553	25.7797	25.6258	-0.635367	0.00184766				+	+	FB-P_Ctrl;P-BF_Ctrl	6	6	6	14	14	14	62.055	0	30.567	1148300000	22	1.838	0.00310381	-0.502178	-4.12769	3.32485	0	-1.13752	-10.4529	Q03111
Q03164	KMT2A	Histone-lysine N-methyltransferase 2A;MLL cleavage product N320;MLL cleavage product C180	27.7013	27.4801	27.4064	27.9644	27.581	28.4112	29.4104	29.1795	29.1236	1.2523	0.00803015					+	P-BF_Ctrl	33	33	33	12.9	12.9	12.9	431.76	0	115.72	2575900000	153	0.826874	0.0560021	0.456256	1.78405	3.78374	0	1.70855	13.6979	Q03164
Q03188	CENPC	Centromere protein C	27.0622	26.7351	26.6034	26.0781	25.8107	25.7458	25.5533	25.5641	25.7971	-0.240033	0.136504				+	+	FB-P_Ctrl;P-BF_Ctrl	13	13	13	17.2	17.2	17.2	106.83	0	37.004	1200400000	49	2.25045	0.00169963	-0.922008	-5.41985	2.74106	0.000300529	-1.16203	-7.36023	Q03188
Q03252	LMNB2	Lamin-B2	29.8768	29.7352	29.6995	28.2073	28.0245	28.0029	28.9608	29.0563	28.9647	0.9157	0.000219606				+	+	FB-P_Ctrl;P-BF_Ctrl	27	24	24	49.4	45.8	45.8	69.948	0	133.51	8152300000	214	4.43624	0	-1.69226	-20.0356	3.61777	0	-0.776583	-12.4265	Q03252
Q03701	CEBPZ	CCAAT/enhancer-binding protein zeta	27.5085	27.0811	26.9932	Not detected	24.8716	Not detected	25.1798	24.749	25.139	0.151	#DIV/0!					+	P-BF_Ctrl	15	15	15	14.7	14.7	14.7	120.97	0	34.278	1277400000	44	0	0.973774	-2.32266	0	3.30518	0	-2.17167	-10.3317	Q03701
Q04206	RELA	Transcription factor p65	26.5306	26.4458	26.4445	Not detected	26.205	26.3161	25.6155	25.0429	25.2997	-0.941183	0.0228222				+	+	FB-P_Ctrl;P-BF_Ctrl	9	9	9	20.5	20.5	20.5	60.218	0	18.655	1234100000	43	1.50837	0.00835256	-0.213065	-3.84624	2.6286	0.000673849	-1.15423	-6.86973	Q04206
Q04323	UBXN1	UBX domain-containing protein 1	26.6351	26.0504	26.0235	Not detected	Not detected	25.9946	25.4221	Not detected	24.9184	-0.82435	#DIV/0!					+	P-BF_Ctrl	6	6	6	38.4	38.4	38.4	33.325	0	33.097	703310000	23	0	0.97414	-0.241725	0	1.35432	0.00927991	-1.06609	-3.3449	Q04323
Q04637	EIF4G1	Eukaryotic translation initiation factor 4 gamma 1	33.2875	33.159	33.1435	32.5255	32.3909	32.3952	31.7574	31.4432	31.5204	-0.863533	0.00116335				+	+	FB-P_Ctrl;P-BF_Ctrl	53	53	50	35.6	35.6	34.1	175.49	0	323.31	1251600000000000	1447	3.55283	0	-0.759471	-11.9606	3.99101	0	-1.62302	-15.4628	Q04637;REV__Q8NEG2
Q04726	TLE3	Transducin-like enhancer protein 3	27.2817	27.1664	27.0842	27.9187	27.7315	27.8192	27.337	27.6377	27.8399	-0.218267	0.233806				+		FB-P_Ctrl	10	10	8	23.2	23.2	20.3	83.416	0	53.97	1959400000	68	2.91823	0.000433526	0.64567	8.19628	1.27736	0.0107827	0.427416	2.7234	Q04726;Q04725;Q04727
Q05209	PTPN12	Tyrosine-protein phosphatase non-receptor type 12	26.3675	25.9378	25.8983	24.975	24.5444	25.3487	24.6274	24.9493	25.0834	-0.0693333	0.80925				+	+	FB-P_Ctrl;P-BF_Ctrl	8	8	8	12.3	12.3	12.3	88.105	0	27.994	898820000	46	1.79895	0.00365103	-1.11187	-4.01825	2.36852	0.00101868	-1.18118	-5.84206	Q05209
Q05519	SRSF11	Serine/arginine-rich splicing factor 11	29.3211	29.1866	29.1849	29.5875	29.2973	29.466	29.9238	29.5786	29.6008	0.2508	0.147103					+	P-BF_Ctrl	9	9	9	22.9	22.9	22.9	53.542	0	111.38	7767700000	290	1.08051	0.0247978	0.219428	2.29847	1.75877	0.00414362	0.470222	3.90773	Q05519
Q05639	EEF1A2	Elongation factor 1-alpha 2	27.9034	27.819	27.6751	Not detected	27.0527	26.8805	26.5792	26.6509	26.8428	-0.275633	0.105576				+	+	FB-P_Ctrl;P-BF_Ctrl	13	4	4	36.9	14	14	50.47	0	25.908	2737600000	78	2.35082	0.00146899	-0.83254	-7.75589	3.37147	0	-1.1082	-10.7458	Q05639
Q05682	CALD1	Caldesmon	30.6505	30.6258	30.6107	30.55	30.4455	30.3338	29.729	29.3032	29.5289	-0.922733	0.00259635					+	P-BF_Ctrl	26	26	26	35.3	35.3	35.3	93.23	0	323.31	22645000000	429	1.3672	0.0114331	-0.185869	-2.9272	3.06869	0	-1.10861	-8.9728	Q05682;REV__O75334;REV__Q13136
Q06124	PTPN11	Tyrosine-protein phosphatase non-receptor type 11	31.5644	31.4697	31.4001	30.9377	31.2724	31.2095	30.2924	30.4407	30.4409	-0.748533	0.00278287					+	P-BF_Ctrl	25	25	25	46.9	46.9	46.9	68.01	0	270.11	34914000000	619	1.39314	0.0107142	-0.338209	-2.98734	4.03095	0	-1.08674	-15.8273	Q06124
Q06203	PPAT	Amidophosphoribosyltransferase	25.9623	25.9474	25.9317	25.6816	Not detected	Not detected	25.3817	25.2061	25.4928	-0.3214	#DIV/0!					+	P-BF_Ctrl	5	5	5	12.8	12.8	12.8	57.398	0	15.559	817170000	43	0	0.976632	-0.265571	0	2.65741	0.000684577	-0.58694	-6.9926	Q06203
Q06210	GFPT1	Glutamine--fructose-6-phosphate aminotransferase [isomerizing] 1	27.891	27.8863	27.8281	26.8243	26.6661	26.7148	26.6845	26.6162	26.4778	-0.142233	0.137344				+	+	FB-P_Ctrl;P-BF_Ctrl	12	12	12	20	20	20	78.806	0	22.17	3260200000	72	4.61594	0	-1.1334	-22.2364	4.42529	0	-1.27564	-19.9087	Q06210;O94808
Q06787	FMR1	Fragile X mental retardation protein 1	27.8464	27.843	27.7949	25.7105	25.8101	25.7871	25.8912	26.1499	26.3331	0.3555	0.0541017				+	+	FB-P_Ctrl;P-BF_Ctrl	14	12	12	23.9	19.6	19.6	71.174	0	50.763	2903300000	83	6.3308	0	-2.05884	-59.846	3.71776	0	-1.70337	-13.1782	Q06787
Q06830	PRDX1	Peroxiredoxin-1	33.1825	33.142	33.115	31.9586	32.2243	32.0141	32.0308	32.2428	32.2119	0.0961667	0.409507				+	+	FB-P_Ctrl;P-BF_Ctrl	15	15	12	48.7	48.7	37.2	22.11	0	93.71	1023100000000000	553	3.6916	0	-1.0808	-12.9774	3.85471	0	-0.984656	-14.279	Q06830
Q07020	RPL18	60S ribosomal protein L18	32.2956	32.1592	32.067	30.5349	30.6933	30.6927	31.4791	31.7666	31.6269	0.9839	0.000560495				+	+	FB-P_Ctrl;P-BF_Ctrl	8	8	8	37.2	37.2	37.2	21.634	0	292.06	50271000000	419	4.26067	0	-1.53362	-18.0928	2.17767	0.0017625	-0.549703	-5.17208	Q07020
Q07021	C1QBP	Complement component 1 Q subcomponent-binding protein, mitochondrial	31.0404	30.996	30.933	30.0146	30.0164	29.9183	30.3571	29.6406	29.9064	-0.0150667	0.946657				+	+	FB-P_Ctrl;P-BF_Ctrl	8	8	8	33.3	33.3	33.3	31.362	0	307.06	23919000000	455	4.62841	0	-1.0067	-22.3977	2.07348	0.00216629	-1.02174	-4.83291	Q07021
Q07065	CKAP4	Cytoskeleton-associated protein 4	30.1884	30.1339	30.0402	29.3825	29.2589	29.3947	29.8994	30.0712	29.8546	0.596367	0.0016489				+		FB-P_Ctrl	27	27	27	55.1	55.1	55.1	66.022	0	323.31	14302000000	531	3.64878	0	-0.775466	-12.6551	1.0663	0.0205145	-0.179109	-2.26878	Q07065
Q07157	TJP1	Tight junction protein ZO-1	30.6243	30.5877	30.503	30.2935	29.9436	30.0506	29.491	29.4902	29.4059	-0.633533	0.00411746				+	+	FB-P_Ctrl;P-BF_Ctrl	57	57	57	50.9	50.9	50.9	195.46	0	323.31	22302000000	617	1.91258	0.00278341	-0.475749	-4.34239	4.76763	0	-1.1093	-24.2785	Q07157
Q07666	KHDRBS1	KH domain-containing, RNA-binding, signal transduction-associated protein 1	31.6887	31.5853	31.5461	30.4298	30.698	30.7157	31.4158	31.7724	31.4988	0.947833	0.0026176				+		FB-P_Ctrl	12	12	11	29.3	29.3	29.3	48.227	0	145.45	41454000000	354	3.20696	0.000180791	-0.992187	-9.74556	0.141985	0.876737	-0.0443745	-0.383104	Q07666;Q5VWX1
Q07866	KLC1	Kinesin light chain 1	30.0096	29.9254	29.8981	29.0835	29.1344	29.1649	28.5941	28.4045	28.5187	-0.621833	0.000489621				+	+	FB-P_Ctrl;P-BF_Ctrl	22	22	17	43.5	43.5	31.1	65.309	0	267.31	12959000000	335	4.42126	0	-0.816714	-19.8622	4.62038	0	-1.43856	-22.2937	Q07866
Q07955	SRSF1	Serine/arginine-rich splicing factor 1	29.5418	29.2785	29.2268	28.0354	28.226	28.0524	28.933	28.8662	28.9411	0.808833	0.000245054				+	+	FB-P_Ctrl;P-BF_Ctrl	12	12	11	42.3	42.3	39.5	27.744	0	65.08	7489100000	284	3.38368	0.000224299	-1.24442	-10.8238	1.91174	0.0029096	-0.435586	-4.33993	Q07955
Q08209	PPP3CA	Serine/threonine-protein phosphatase 2B catalytic subunit alpha isoform;Serine/threonine-protein phosphatase 2B catalytic subunit beta isoform	26.979	26.8715	26.7546	25.8521	25.9273	25.9992	Not detected	25.0718	Not detected	-0.8544	#DIV/0!				+		FB-P_Ctrl	8	8	6	16.7	16.7	13.1	58.687	0	26.947	1510000000	59	3.5809	0	-0.942153	-12.1599	0	1	-1.79658	0	Q08209;P16298
Q08211	DHX9	ATP-dependent RNA helicase A	32.0102	31.9882	31.9325	31.7967	31.7958	31.8702	31.8829	31.8953	31.8482	0.0545667	0.127039				+	+	FB-P_Ctrl;P-BF_Ctrl	38	38	38	38.2	38.2	38.2	140.96	0	323.31	63057000000	1293	2.00397	0.00257235	-0.156022	-4.61623	1.69983	0.0041875	-0.101489	-3.74924	Q08211
Q08752	PPID	Peptidyl-prolyl cis-trans isomerase D	25.5602	25.3733	25.2275	24.7466	24.7971	24.715	Not detected	Not detected	24.1356	-0.6173	#DIV/0!				+		FB-P_Ctrl	5	5	5	15.9	15.9	15.9	40.763	0	11.902	411910000	20	2.51179	0.00121909	-0.634097	-6.39065	0	1	-1.25136	0	Q08752
Q08945	SSRP1	FACT complex subunit SSRP1	28.7346	28.4488	28.3577	27.3403	27.2356	27.2199	27.558	27.1835	27.2202	0.0553	0.681153				+	+	FB-P_Ctrl;P-BF_Ctrl	15	15	15	23.8	23.8	23.8	81.074	0	76.399	3715400000	133	3.32167	0.000203822	-1.24844	-10.4333	2.71593	0.000295833	-1.19315	-7.24803	Q08945
Q08AD1	CAMSAP2	Calmodulin-regulated spectrin-associated protein 2	25.959	25.8091	25.5937	25.6131	25.9207	25.8946	25.3511	Not detected	25.1237	-0.572067	0.0332471					+	P-BF_Ctrl	9	9	9	11.3	11.3	11.3	168.09	0	26.183	720820000	36	0.0527108	0.990662	0.022157	0.153137	1.37711	0.00833586	-0.549911	-3.41602	Q08AD1
Q08J23	NSUN2	tRNA (cytosine(34)-C(5))-methyltransferase	29.2278	29.1244	29.0718	28.9288	29.0375	29.1097	28.9456	28.9908	28.8145	-0.108367	0.219773					+	P-BF_Ctrl	24	24	24	41.6	41.6	41.6	86.47	0	224.67	8215100000	251	0.765753	0.0705126	-0.116029	-1.66376	1.48571	0.00645021	-0.224412	-3.20704	Q08J23
Q09161	NCBP1	Nuclear cap-binding protein subunit 1	26.2894	26.2833	26.2208	27.8119	28.5565	27.4508	27.9991	27.5763	27.644	-0.199933	0.599344				+	+	FB-P_Ctrl;P-BF_Ctrl	12	12	12	19	19	19	91.838	0	55.483	1112000000	78	2.16641	0.00216783	1.67523	5.13457	3.42576	0	1.47528	11.0966	Q09161
Q09666	AHNAK	Neuroblast differentiation-associated protein AHNAK	32.61	32.5854	32.5619	32.2911	31.9316	32.0561	31.4606	31.1211	31.2097	-0.829133	0.00479754				+	+	FB-P_Ctrl;P-BF_Ctrl	180	180	180	57.6	57.6	57.6	629.09	0	323.31	92567000000	1960	2.01031	0.002589	-0.492861	-4.6357	3.67959	0	-1.32198	-12.8863	Q09666
Q0JRZ9	FCHO2	F-BAR domain only protein 2	26.1862	26.1486	25.9871	24.8471	25.16	25.1805	24.0459	Not detected	23.9622	-1.05848	0.0050719				+	+	FB-P_Ctrl;P-BF_Ctrl	7	7	7	14.8	14.8	14.8	88.923	0	13.934	832990000	45	2.9643	0.00044843	-1.04477	-8.42726	3.84248	0	-2.10325	-24.8011	Q0JRZ9
Q0PNE2	ELP6	Elongator complex protein 6	28.4118	28.4011	28.3157	27.4735	27.6197	28.039	27.2866	27.1092	27.2387	-0.499233	0.0482388				+	+	FB-P_Ctrl;P-BF_Ctrl	9	9	9	31.2	31.2	31.2	29.793	0	69.949	4522600000	144	1.74304	0.00424138	-0.665428	-3.86501	4.35091	0	-1.16469	-19.0671	Q0PNE2
Q0VDF9	HSPA14	Heat shock 70 kDa protein 14	26.5352	26.0783	26.0289	25.7203	25.7185	25.5303	25.8398	25.7711	25.8954	0.179067	0.069121				+		FB-P_Ctrl	6	6	6	19.8	19.8	19.8	54.794	0	48.832	875960000	53	1.49221	0.00872051	-0.557774	-3.22279	1.07801	0.0197066	-0.3787	-2.29325	Q0VDF9
Q10570	CPSF1	Cleavage and polyadenylation specificity factor subunit 1	28.1179	28.0853	28.019	28.2589	28.2488	28.245	28.497	28.6693	28.3747	0.262767	0.0372407				+	+	FB-P_Ctrl;P-BF_Ctrl	23	23	23	20.9	20.9	20.9	160.88	0	191.35	4169600000	206	2.41482	0.00153131	0.176772	6.01483	2.08495	0.00209955	0.439564	4.86938	Q10570
Q12769	NUP160	Nuclear pore complex protein Nup160	26.6339	26.601	26.4553	25.8431	24.2933	24.6481	24.5926	24.878	24.8988	-0.138367	0.787073				+	+	FB-P_Ctrl;P-BF_Ctrl	9	9	9	7.3	7.3	7.3	162.12	0	32.039	1185400000	52	1.58986	0.00653449	-1.63526	-3.4645	4.0167	0	-1.77362	-15.6963	Q12769
Q12788	TBL3	Transducin beta-like protein 3	27.3413	27.3399	27.24	26.0013	25.88	25.8965	26.9067	26.7552	26.8443	0.909467	9.72485e-05				+	+	FB-P_Ctrl;P-BF_Ctrl	14	14	14	26.6	26.6	26.6	89.034	0	96.066	2125100000	81	4.96801	0	-1.38113	-27.2626	2.98468	0	-0.471651	-8.53132	Q12788
Q12789	GTF3C1	General transcription factor 3C polypeptide 1	26.7745	26.767	26.7428	27.274	26.9889	27.2267	27.0455	26.9636	26.885	-0.1985	0.117165				+	+	FB-P_Ctrl;P-BF_Ctrl	22	22	22	12.8	12.8	12.8	238.87	0	54.821	1636400000	91	1.97494	0.00271213	0.401777	4.52795	1.89586	0.00296067	0.203238	4.2936	Q12789
Q12792	TWF1	Twinfilin-1	28.643	28.4643	28.4428	27.7163	27.7865	27.5997	27.3556	27.2445	27.3824	-0.373333	0.00562812				+	+	FB-P_Ctrl;P-BF_Ctrl	13	13	12	43.7	43.7	41.7	40.282	0	149.05	5240500000	153	3.20875	0.000181474	-0.815833	-9.75593	4.00631	0	-1.1892	-15.6015	Q12792
Q12800	TFCP2	Alpha-globin transcription factor CP2	27.7788	27.7238	27.7168	27.2767	27.3087	27.3476	26.3363	26.1156	26.2421	-1.07967	8.74766e-05				+	+	FB-P_Ctrl;P-BF_Ctrl	6	6	5	15.3	15.3	11.8	57.255	0	64	2894800000	143	3.9508	0	-0.428792	-15.1039	4.64113	0	-1.50848	-22.5634	Q12800;Q9NZI6
Q12830	BPTF	Nucleosome-remodeling factor subunit BPTF	28.3618	28.3419	28.3036	28.367	28.1176	28.5655	28.812	28.6657	28.6776	0.3684	0.0556126					+	P-BF_Ctrl	28	28	28	12	12	12	338.26	0	113.39	4648200000	132	0.0370467	1	0.0142841	0.109293	2.80769	0.000105611	0.382645	7.66523	Q12830
Q12857	NFIA	Nuclear factor 1 A-type	27.4209	27.2151	27.0753	27.6834	28.0744	28.1944	28.3195	27.3643	27.7717	-0.165567	0.628879				+		FB-P_Ctrl	7	7	5	24	24	19.8	55.944	0	20.77	1892300000	48	1.81359	0.00335103	0.747007	4.05906	0.922696	0.0324456	0.581367	1.97501	Q12857
Q12872	SFSWAP	Splicing factor, suppressor of white-apricot homolog	27.0467	26.7718	26.7187	27.4933	27.4283	27.7718	27.1695	26.9285	27.4082	-0.395733	0.0853153				+		FB-P_Ctrl	12	12	12	16.3	16.3	16.3	104.82	0	38.023	1685700000	48	2.09763	0.00235432	0.718742	4.90995	0.875526	0.0374899	0.323026	1.88059	Q12872
Q12874	SF3A3	Splicing factor 3A subunit 3	28.3493	28.3056	28.3024	29.5007	29.225	29.3138	29.3121	29.1551	29.3196	-0.0842333	0.435711				+	+	FB-P_Ctrl;P-BF_Ctrl	14	14	14	33.5	33.5	33.5	58.848	0	205.37	5496500000	276	3.61874	0	1.02743	12.4336	4.14613	0	0.943172	16.9262	Q12874
Q12888	TP53BP1	Tumor suppressor p53-binding protein 1	26.8923	26.6501	26.5858	27.9874	27.4077	28.4121	27.6701	26.9957	27.2461	-0.631767	0.146594				+		FB-P_Ctrl	20	20	20	17.1	17.1	17.1	213.57	0	61.916	1507400000	76	1.79666	0.00364568	1.22639	4.0119	1.2802	0.0106818	0.59461	2.72975	Q12888
Q12904	AIMP1	Aminoacyl tRNA synthase complex-interacting multifunctional protein 1;Endothelial monocyte-activating polypeptide 2	27.6444	27.5845	27.5205	26.0305	26.6558	26.8358	26.9696	26.2317	26.6767	0.118633	0.733505				+	+	FB-P_Ctrl;P-BF_Ctrl	8	8	8	43.3	43.3	43.3	34.352	0	18.637	2533500000	52	1.91915	0.00278984	-1.07577	-4.36169	1.93246	0.00293866	-0.957159	-4.40094	Q12904
Q12905	ILF2	Interleukin enhancer-binding factor 2	30.5489	30.1833	30.073	29.3489	29.2229	29.1037	29.6159	29.8171	29.7609	0.506133	0.0054829				+	+	FB-P_Ctrl;P-BF_Ctrl	18	18	18	53.8	53.8	53.8	43.062	0	288.49	13953000000	384	2.54123	0.00113407	-1.04322	-6.50858	1.58317	0.00486338	-0.537097	-3.44762	Q12905
Q12906	ILF3	Interleukin enhancer-binding factor 3	31.5677	31.0271	31.0101	29.5868	29.618	29.7158	30.5737	30.4839	30.3954	0.844133	0.000196708				+	+	FB-P_Ctrl;P-BF_Ctrl	26	26	21	32	32	28.9	95.337	0	191.56	27229000000	464	2.94726	0.000441826	-1.56144	-8.34112	1.70801	0.00414108	-0.717309	-3.77098	Q12906
Q12923	PTPN13	Tyrosine-protein phosphatase non-receptor type 13	28.9294	28.7612	28.6585	27.7217	27.0158	27.8256	25.6387	25.4309	26.252	-1.74717	0.00785852				+	+	FB-P_Ctrl;P-BF_Ctrl	40	40	40	20.5	20.5	20.5	276.9	0	107.48	5646000000	179	2.04336	0.00238291	-1.26198	-4.73811	3.50478	0	-3.00916	-11.6266	Q12923
Q12931	TRAP1	Heat shock protein 75 kDa, mitochondrial	30.5198	30.4219	30.4202	29.6179	29.2748	29.3761	29.4925	29.4398	29.389	0.0175	0.876958				+	+	FB-P_Ctrl;P-BF_Ctrl	24	24	24	42.6	42.6	42.6	80.109	0	254.41	18555000000	387	3.18817	0.000176471	-1.03105	-9.63701	4.65878	0	-1.01355	-22.7953	Q12931
Q12955	ANK3	Ankyrin-3	28.3071	28.1602	27.8263	26.9963	25.9413	26.9538	26.1516	26.0748	26.2662	-0.466267	0.252783				+	+	FB-P_Ctrl;P-BF_Ctrl	24	24	20	8	8	6.9	480.4	0	84.194	3094000000	133	1.7685	0.00406672	-1.46743	-3.9343	3.64944	0	-1.93368	-12.66	Q12955;P16157
Q12959	DLG1	Disks large homolog 1	27.8733	27.8544	27.7967	26.3536	25.8132	25.8492	26.3514	25.7239	26.7017	0.253667	0.491103				+	+	FB-P_Ctrl;P-BF_Ctrl	16	16	16	26.2	26.2	26.2	100.45	0	40.681	2911900000	99	3.32204	0.000204255	-1.83615	-10.4356	2.27754	0.00137763	-1.58249	-5.51445	Q12959;Q15700
Q12962	TAF10	Transcription initiation factor TFIID subunit 10	24.4352	24.4116	24.4043	26.3873	25.0534	25.0316	25.0613	24.8494	25.0906	-0.490333	0.341565					+	P-BF_Ctrl	1	1	1	11.5	11.5	11.5	21.711	0	21.595	282620000	30	1.12608	0.0217569	1.07374	2.39447	2.79776	0.000104918	0.583398	7.61911	Q12962
Q12965	MYO1E	Unconventional myosin-Ie	26.4498	26.425	26.2324	25.9704	26.3658	25.8886	25.5716	25.4707	25.5462	-0.545433	0.0222378					+	P-BF_Ctrl	11	11	11	11.7	11.7	11.7	127.06	0	36.376	1132400000	63	0.839526	0.0541967	-0.294114	-1.80908	3.43845	0	-0.839565	-11.1802	Q12965;O00160
Q12972	PPP1R8	Nuclear inhibitor of protein phosphatase 1;Activator of RNA decay	26.2295	26.1626	26.052	26.5638	26.4829	26.6141	25.5975	25.9009	25.8944	-0.756	0.00212566				+	+	FB-P_Ctrl;P-BF_Ctrl	7	7	7	37.6	37.6	37.6	38.478	0	24.627	788380000	36	2.48957	0.00130925	0.405568	6.30283	1.44574	0.00710054	-0.350457	-3.11117	Q12972
Q12979	ABR	Active breakpoint cluster region-related protein	26.0246	25.9662	25.904	Not detected	26.1002	25.8136	25.8298	25.7924	25.5965	-0.217333	0.223094					+	P-BF_Ctrl	6	6	6	9.5	9.5	9.5	97.597	0	8.0089	834320000	16	0.0226153	1	-0.00800673	-0.0690987	1.31441	0.00976963	-0.225344	-2.80663	Q12979
Q12996	CSTF3	Cleavage stimulation factor subunit 3	27.8056	27.5447	27.4126	26.7053	27.0957	27.0551	27.4744	27.224	27.0997	0.314	0.131212				+		FB-P_Ctrl	14	14	14	27.9	27.9	27.9	82.921	0	93.955	2135100000	116	1.70122	0.00475371	-0.635629	-3.75292	0.942465	0.0299665	-0.321604	-2.01485	Q12996
Q13017	ARHGAP5	Rho GTPase-activating protein 5	25.9801	25.8957	25.8841	25.3636	25.6921	25.7439	25.3982	25.287	25.245	-0.2898	0.0855269					+	P-BF_Ctrl	9	9	9	9.3	9.3	9.3	172.46	0	16.255	854980000	46	1.22388	0.0164204	-0.320084	-2.60521	3.43064	0	-0.6099	-11.1287	Q13017
Q13043	STK4	Serine/threonine-protein kinase 4;Serine/threonine-protein kinase 4 37kDa subunit;Serine/threonine-protein kinase 4 18kDa subunit	26.111	26.0524	25.996	25.8731	25.8836	25.2546	25.0356	24.6902	24.7939	-0.830533	0.0230911					+	P-BF_Ctrl	7	7	3	20.7	20.7	9.2	55.63	0	34.466	877970000	48	0.843606	0.0533133	-0.382666	-1.81716	3.45339	0	-1.21319	-11.2793	Q13043
Q13045	FLII	Protein flightless-1 homolog	26.1168	25.9548	25.9535	Not detected	Not detected	25.3852	Not detected	25.5338	25.6951	0.22925	#DIV/0!					+	P-BF_Ctrl	11	11	11	8.6	8.6	8.6	144.75	0	15.29	866560000	39	0	0.870399	-0.623198	0	1.62748	0.004554	-0.393936	-4.26978	Q13045
Q13085	ACACA	Acetyl-CoA carboxylase 1;Biotin carboxylase	35.5294	35.4323	35.3411	34.2113	34.0825	34.2007	35.4804	35.2194	35.2419	1.14907	0.000248141				+		FB-P_Ctrl	122	122	108	54.5	54.5	48.5	265.55	0	323.31	3516200000000000	4845	4.30789	0	-1.26943	-18.5964	0.53191	0.149194	-0.120309	-1.20729	Q13085
Q13123	IK	Protein Red	30.0028	29.978	29.9758	30.689	30.6303	30.6872	30.6161	30.3199	30.4894	-0.1937	0.0923823				+	+	FB-P_Ctrl;P-BF_Ctrl	23	23	23	46.7	46.7	46.7	65.601	0	323.31	13733000000	299	5.26294	0	0.683308	32.3282	2.32323	0.00107196	0.489621	5.67705	Q13123
Q13131	PRKAA1	5-AMP-activated protein kinase catalytic subunit alpha-1	25.4751	25.4704	25.3505	26.0083	26.0292	25.8159	Not detected	25.1774	25.1954	-0.764733	0.00319572				+	+	FB-P_Ctrl;P-BF_Ctrl	6	6	4	14.3	14.3	8.4	64.009	0	18.407	659500000	22	2.55321	0.00114794	0.51918	6.55711	1.72164	0.00409461	-0.245584	-4.62943	Q13131
Q13148	TARDBP	TAR DNA-binding protein 43	29.8259	29.548	29.4884	28.6918	28.74	29.0936	29.3708	29.4396	29.3569	0.5473	0.0133126				+		FB-P_Ctrl	7	7	7	21	21	21	44.739	0	323.31	10008000000	160	2.04824	0.00231162	-0.778953	-4.75336	1.01507	0.0240425	-0.231605	-2.16276	Q13148
Q13151	HNRNPA0	Heterogeneous nuclear ribonucleoprotein A0	31.266	31.111	31.0952	29.6617	29.9738	30.2159	30.4155	30.6278	30.5687	0.586867	0.0271904				+	+	FB-P_Ctrl;P-BF_Ctrl	8	8	8	25.2	25.2	25.2	30.84	0	226.24	33979000000	473	2.68768	0.000973236	-1.20693	-7.12373	2.75598	0.000303095	-0.620059	-7.42758	Q13151
Q13155	AIMP2	Aminoacyl tRNA synthase complex-interacting multifunctional protein 2	27.5557	27.479	27.3997	26.2374	Not detected	Not detected	25.5633	25.6896	25.7605	-0.566267	#DIV/0!					+	P-BF_Ctrl	6	6	6	32.5	32.5	32.5	35.348	0	68.979	1675600000	76	0	0.873216	-1.24076	0	4.79643	0	-1.80701	-24.6867	Q13155
Q13162	PRDX4	Peroxiredoxin-4	26.9597	26.8852	26.756	25.4906	25.5708	26.1836	Not detected	26.0457	26.8422	0.695617	0.188187				+		FB-P_Ctrl	7	5	5	29.2	24.7	24.7	30.54	0	21.045	864270000	56	2.10438	0.00236425	-1.1186	-4.93166	0.58243	0.119773	-0.423001	-1.37959	Q13162
Q13177	PAK2	Serine/threonine-protein kinase PAK 2;PAK-2p27;PAK-2p34	29.0669	29.0522	28.9347	29.0056	29.223	29.2501	28.5987	28.6424	28.8145	-0.474367	0.00953184					+	P-BF_Ctrl	21	21	18	56.3	56.3	47.9	58.042	0	105.52	7802200000	239	0.738482	0.077978	0.141648	1.61036	1.88604	0.00310427	-0.332774	-4.26513	Q13177;O75914
Q13185	CBX3	Chromobox protein homolog 3	29.9768	29.6403	29.5612	29.7666	29.4655	29.2198	29.3069	29.0727	29.3455	-0.242267	0.248724					+	P-BF_Ctrl	5	5	4	23.5	23.5	14.8	20.811	0	75.319	9822600000	202	0.524429	0.183568	-0.242165	-1.19261	1.46626	0.00689994	-0.484413	-3.16021	Q13185
Q13190	STX5	Syntaxin-5	27.2642	26.6558	26.5881	Not detected	Not detected	Not detected	25.8871	26.0501	25.8592	#DIV/0!	#DIV/0!					+	P-BF_Ctrl	5	5	5	23.7	23.7	23.7	39.672	0	14.873	1196000000	33	0	0.87151	Not detected	0	1.81106	0.00377626	-0.903861	-4.05198	Q13190
Q13200	PSMD2	26S proteasome non-ATPase regulatory subunit 2	29.6448	29.6028	29.4971	28.3685	28.4599	28.2801	28.4348	28.4225	28.1242	-0.0423333	0.729309				+	+	FB-P_Ctrl;P-BF_Ctrl	21	21	21	29.4	29.4	29.4	100.2	0	125.72	9176500000	192	4.23456	0	-1.21202	-17.8201	3.46198	0	-1.25437	-11.3366	Q13200
Q13206	DDX10	Probable ATP-dependent RNA helicase DDX10	30.3479	30.2692	30.2072	28.9886	28.9604	28.9853	29.299	29.0626	28.9889	0.138733	0.213844				+	+	FB-P_Ctrl;P-BF_Ctrl	29	29	29	40.8	40.8	40.8	100.89	0	292.37	12482000000	225	5.19637	0	-1.29668	-31.1088	3.46394	0	-1.15795	-11.3497	Q13206
Q13242	SRSF9	Serine/arginine-rich splicing factor 9	27.1845	27.1833	27.183	26.7631	26.7582	Not detected	26.6842	26.485	27.1463	0.0111833	0.967503				+		FB-P_Ctrl	9	8	8	40.7	37.6	37.6	25.542	0	14.058	1920700000	33	6.70313	0	-0.422949	-223.283	0.985626	0.0263582	-0.411776	-2.10247	Q13242
Q13247	SRSF6	Serine/arginine-rich splicing factor 6	28.3214	28.1204	28.0863	27.6759	27.4827	27.0772	27.6503	27.7386	27.38	0.1777	0.438592				+	+	FB-P_Ctrl;P-BF_Ctrl	7	7	6	18.3	18.3	15.7	39.586	0	19.206	4155600000	80	1.79214	0.00363769	-0.764069	-3.99937	1.96413	0.00282948	-0.586412	-4.49536	Q13247;Q08170
Q13257	MAD2L1	Mitotic spindle assembly checkpoint protein MAD2A	27.0155	26.8368	26.6853	Not detected	26.0384	25.8428	25.8228	26.1792	25.8951	0.0251	0.884028				+	+	FB-P_Ctrl;P-BF_Ctrl	4	4	4	19.5	19.5	19.5	23.51	0	43.817	1414400000	23	2.09704	0.00235235	-0.905227	-6.32274	2.43251	0.00095053	-0.880146	-6.08199	Q13257
Q13263	TRIM28	Transcription intermediary factor 1-beta	31.7112	31.6692	31.6382	32.7359	32.5516	32.6232	32.5712	32.352	32.5052	-0.160767	0.128905				+	+	FB-P_Ctrl;P-BF_Ctrl	24	24	24	44.8	44.8	44.8	88.549	0	323.31	58324000000	1143	4.12469	0	0.964073	16.7162	3.52445	0	0.803265	11.7622	Q13263
Q13283	G3BP1	Ras GTPase-activating protein-binding protein 1	31.6511	31.3878	31.2981	29.8654	30.5093	30.7172	31.0656	30.8879	30.9352	0.598933	0.0841085				+	+	FB-P_Ctrl;P-BF_Ctrl	22	22	20	60.5	60.5	57.7	52.164	0	323.31	36957000000	974	1.75561	0.00426898	-1.08173	-3.89912	1.81887	0.00371839	-0.482769	-4.07384	Q13283
Q13309	SKP2	S-phase kinase-associated protein 2	25.6599	25.3207	25.2441	26.1748	26.6009	26.8832	25.7083	26.0266	26.1397	-0.594767	0.070664				+	+	FB-P_Ctrl;P-BF_Ctrl	5	5	5	16	16	16	47.76	0	22.365	672460000	36	2.03896	0.00237705	1.14476	4.72438	1.41036	0.00763251	0.550018	3.02759	Q13309
Q13310	PABPC4	Polyadenylate-binding protein 4	27.8563	27.8369	27.7501	26.4604	26.9319	26.8832	27.2191	27.4285	27.6338	0.668633	0.0251666				+	+	FB-P_Ctrl;P-BF_Ctrl	15	8	6	25.6	14.4	12.6	70.782	0	38.387	2944500000	79	2.63358	0.00120985	-1.05592	-6.89085	1.44988	0.00704762	-0.387292	-3.12104	Q13310
Q13325	IFIT5	Interferon-induced protein with tetratricopeptide repeats 5	30.9862	30.8661	30.82	29.5698	30.5105	30.5487	29.3089	29.4064	29.3553	-0.8528	0.0567605					+	P-BF_Ctrl	18	18	18	40.9	40.9	40.9	55.846	0	323.31	25971000000	324	0.985716	0.0336204	-0.681127	-2.10265	4.94666	0	-1.5339	-26.9282	Q13325;Q5T764;P09914
Q13330	MTA1	Metastasis-associated protein MTA1	29.8875	29.8698	29.857	30.2935	29.9841	30.0771	30.5683	30.1489	30.304	0.222167	0.219967					+	P-BF_Ctrl	27	27	22	47.4	47.4	39.2	80.785	0	201.01	13206000000	340	1.25817	0.0145734	0.246824	2.68073	1.72666	0.0041027	0.468969	3.82085	Q13330
Q13347	EIF3I	Eukaryotic translation initiation factor 3 subunit I	29.7756	29.7384	29.7094	29.5921	29.5616	29.4353	28.9739	28.6764	28.8629	-0.691933	0.00222029				+	+	FB-P_Ctrl;P-BF_Ctrl	12	12	12	49.5	49.5	49.5	36.501	0	203.85	14521000000	315	1.82518	0.00322667	-0.211472	-4.09156	3.27751	0	-0.903415	-10.1633	Q13347
Q13356	PPIL2	Peptidyl-prolyl cis-trans isomerase-like 2	29.3624	29.2503	29.2106	30.2649	30.4002	30.4433	31.1229	31.2631	31.0151	0.764233	0.00104043				+	+	FB-P_Ctrl;P-BF_Ctrl	24	24	24	55	55	55	58.823	0	323.31	10685000000	343	4.00179	0	1.09502	15.5603	4.58826	0	1.85925	21.8825	Q13356
Q13371	PDCL	Phosducin-like protein	28.0783	27.9235	27.7823	25.9874	25.9151	26.1786	25.4154	25.5935	25.7978	-0.4248	0.0350814				+	+	FB-P_Ctrl;P-BF_Ctrl	8	8	8	31.9	31.9	31.9	34.281	0	71.149	2500600000	71	4.08876	0	-1.90099	-16.3699	4.11792	0	-2.32576	-16.6504	Q13371;P20941
Q13404	UBE2V1	Ubiquitin-conjugating enzyme E2 variant 1	27.1441	26.867	26.8595	26.1288	25.4986	25.5976	Not detected	25.6645	25.8069	-0.00596667	0.983009				+	+	FB-P_Ctrl;P-BF_Ctrl	4	4	1	24.5	24.5	6.1	16.495	0	7.0419	1138200000	22	2.30224	0.00155598	-1.21521	-5.60189	2.57278	0.000655238	-1.22117	-9.24888	Q13404
Q13405	MRPL49	39S ribosomal protein L49, mitochondrial	25.5078	25.2933	24.8348	24.6115	24.2231	24.2178	25.0294	24.6368	24.3638	0.325867	0.23457				+		FB-P_Ctrl	3	3	3	23.5	23.5	23.5	19.198	0	42.014	408250000	43	1.65299	0.00536376	-0.861142	-3.62626	0.90151	0.0345661	-0.535271	-1.93249	Q13405
Q13416	ORC2	Origin recognition complex subunit 2	30.1205	29.9848	29.9739	30.4964	30.5289	30.5893	30.4154	30.4324	30.4315	-0.111767	0.0158076				+	+	FB-P_Ctrl;P-BF_Ctrl	18	18	18	37.4	37.4	37.4	65.971	0	200.5	13822000000	356	3.14601	0.000169912	0.51178	9.39761	2.96374	0.000114833	0.400019	8.42443	Q13416
Q13428	TCOF1	Treacle protein	32.4291	32.2027	32.1844	31.3328	31.3401	31.1798	31.6123	31.292	31.4575	0.1697	0.18538				+	+	FB-P_Ctrl;P-BF_Ctrl	31	31	31	23.8	23.8	23.8	152.1	0	323.31	57008000000	663	3.32582	0.000204691	-0.98785	-10.459	2.59737	0.000659636	-0.818126	-6.73873	Q13428
Q13435	SF3B2	Splicing factor 3B subunit 2	31.2991	31.1604	31.1364	31.761	31.6767	31.9045	31.776	31.7776	31.7121	-0.0255	0.733753				+	+	FB-P_Ctrl;P-BF_Ctrl	42	42	42	46.8	46.8	46.8	100.23	0	323.31	35351000000	860	2.64969	0.00121986	0.582073	6.9595	3.26701	0	0.556545	10.1001	Q13435
Q13442	PDAP1	28 kDa heat- and acid-stable phosphoprotein	32.1935	32.0978	32.0195	30.795	31.2132	30.9613	30.2989	30.5616	30.4151	-0.564633	0.0169831				+	+	FB-P_Ctrl;P-BF_Ctrl	7	7	7	36.5	36.5	36.5	20.63	0	323.31	44966000000	399	2.97183	0.000453172	-1.11377	-8.46556	4.29122	0	-1.67842	-18.4171	Q13442
Q13480	GAB1	GRB2-associated-binding protein 1	26.0512	25.976	25.9012	25.3297	25.3763	25.426	Not detected	Not detected	Not detected	#DIV/0!	#DIV/0!				+		FB-P_Ctrl	5	5	5	10.1	10.1	10.1	76.615	0	8.6533	752490000	26	3.50664	0	-0.598823	-11.6394	0	1	Not detected	0	Q13480
Q13492	PICALM	Phosphatidylinositol-binding clathrin assembly protein	27.5478	27.5104	27.4172	Not detected	26.5744	26.3662	26.0038	26.4668	26.2126	-0.242567	0.290425				+	+	FB-P_Ctrl;P-BF_Ctrl	9	9	9	20.7	20.7	20.7	70.754	0	30.875	2385000000	51	2.79988	0.000784211	-1.02147	-11.0552	3.08638	0	-1.2641	-9.06837	Q13492;O60641
Q13501	SQSTM1	Sequestosome-1	28.8141	28.7719	28.7512	27.0625	27.0472	27.1006	26.183	26.0807	26.0861	-0.9535	1.32298e-05				+	+	FB-P_Ctrl;P-BF_Ctrl	6	6	6	24.1	24.1	24.1	47.687	0	55.782	4102500000	127	6.60514	0	-1.70897	-70.0933	6.60329	0	-2.66247	-70.0185	Q13501
Q13523	PRPF4B	Serine/threonine-protein kinase PRP4 homolog	26.7967	26.6895	26.5638	Not detected	Not detected	Not detected	25.1136	25.4437	25.1059	#DIV/0!	#DIV/0!					+	P-BF_Ctrl	8	8	8	10.1	10.1	10.1	116.99	0	10.85	901530000	35	0	0.869554	Not detected	0	3.44743	0	-1.46227	-11.2396	Q13523
Q13526	PIN1	Peptidyl-prolyl cis-trans isomerase NIMA-interacting 1	27.3092	27.2249	27.1378	25.2666	Not detected	24.5472	Not detected	Not detected	Not detected	#DIV/0!	#DIV/0!				+		FB-P_Ctrl	4	4	4	33.1	33.1	33.1	18.243	0	10.764	788710000	34	2.45202	0.00156936	-2.31707	-8.40621	0	1	Not detected	0	Q13526;O15428
Q13547	HDAC1	Histone deacetylase 1	26.8998	26.844	26.8221	28.2279	28.1897	28.3166	28.3653	27.6822	27.9527	-0.244667	0.292755				+	+	FB-P_Ctrl;P-BF_Ctrl	11	6	6	27.6	16.6	16.6	55.102	0	33.547	1813900000	88	5.21685	0	1.38942	31.4789	2.3366	0.000999167	1.14478	5.72536	Q13547
Q13557	CAMK2D	Calcium/calmodulin-dependent protein kinase type II subunit delta;Calcium/calmodulin-dependent protein kinase type II subunit alpha	26.3407	26.222	26.1136	26.057	26.0107	26.0422	25.8841	25.2708	25.6926	-0.4208	0.0814692					+	P-BF_Ctrl	6	6	3	15.8	15.8	8.2	56.369	0	19.721	1001300000	47	1.31938	0.0122448	-0.18881	-2.81788	1.46792	0.00690822	-0.60958	-3.16419	Q13557;Q9UQM7
Q13561	DCTN2	Dynactin subunit 2	28.1822	28.1531	28.1222	29.3216	29.1711	29.1678	27.9131	27.8179	27.7871	-1.3808	2.61897e-05				+	+	FB-P_Ctrl;P-BF_Ctrl	17	17	17	55.6	55.6	55.6	44.23	0	89.554	4794900000	182	4.42624	0	1.06768	19.9197	2.77472	0.000203024	-0.313138	-7.51295	Q13561
Q13564	NAE1	NEDD8-activating enzyme E1 regulatory subunit	27.7318	27.6318	27.6062	27.6942	27.6846	27.6163	27.3162	27.2399	27.2736	-0.388467	0.000297846					+	P-BF_Ctrl	12	12	12	33.5	33.5	33.5	60.246	0	80.364	2671900000	107	0.0644597	0.976272	0.0084273	0.185225	2.99624	0	-0.38001	-8.59084	Q13564
Q13573	SNW1	SNW domain-containing protein 1	29.9222	29.8664	29.8098	30.3134	30.2482	30.2721	30.6315	30.635	30.6567	0.363167	6.09251e-05				+	+	FB-P_Ctrl;P-BF_Ctrl	26	26	26	54.1	54.1	54.1	61.494	0	323.31	13249000000	319	3.40134	0.000227488	0.411764	10.9375	4.68869	0	0.7749	23.1937	Q13573
Q13586	STIM1	Stromal interaction molecule 1	26.4156	26.3689	25.9805	Not detected	25.1189	24.7479	24.9435	24.5324	24.7212	-0.201033	0.40209				+	+	FB-P_Ctrl;P-BF_Ctrl	6	6	6	10.9	10.9	10.9	77.422	0	27.446	841760000	36	2.00458	0.00257442	-1.32159	-5.8629	2.95202	0.000114286	-1.52266	-8.36512	Q13586
Q13596	SNX1	Sorting nexin-1	29.6737	29.5467	29.5153	29.0195	28.804	28.9819	28.5968	28.3577	28.7427	-0.3694	0.0472337				+	+	FB-P_Ctrl;P-BF_Ctrl	23	23	21	45.6	45.6	41.6	59.069	0	206.41	11422000000	342	2.84162	0.000533333	-0.643445	-7.82485	2.93635	0.000113208	-1.01286	-8.28643	Q13596
Q13601	KRR1	KRR1 small subunit processome component homolog	27.7955	27.7626	27.7232	26.7949	26.6165	26.7115	27.253	27.2315	27.4132	0.5916	0.00154961				+	+	FB-P_Ctrl;P-BF_Ctrl	10	10	10	32	32	32	43.664	0	28.1	2540500000	81	4.33886	0	-1.05281	-18.9341	2.78464	0.000204793	-0.461215	-7.55848	Q13601
Q13613	MTMR1	Myotubularin-related protein 1	26.6486	26.3913	26.29	25.8799	25.6718	25.7594	25.8058	25.5042	25.7612	-0.0799667	0.513546				+	+	FB-P_Ctrl;P-BF_Ctrl	9	9	9	15.6	15.6	15.6	74.677	0	15.629	1244000000	76	2.27019	0.00152134	-0.67288	-5.48865	2.21375	0.00142587	-0.752834	-5.29377	Q13613
Q13618	CUL3	Cullin-3	25.7724	25.7266	25.7239	25.4956	25.3941	25.4373	25.6305	25.5664	25.7541	0.208	0.0290776				+		FB-P_Ctrl	10	10	10	16.1	16.1	16.1	88.929	0	19.13	791450000	40	3.06602	0.000155844	-0.298636	-8.95842	0.723696	0.0655305	-0.0906169	-1.58146	Q13618
Q13620	CUL4B	Cullin-4B	29.7624	29.7083	29.6957	29.8525	30.0808	30.0844	29.9749	29.7952	29.8018	-0.1486	0.199061				+		FB-P_Ctrl	35	35	27	39.1	39.1	31	103.98	0	319.48	12721000000	361	1.63286	0.00570882	0.283737	3.5742	1.01909	0.0237809	0.13517	2.17102	Q13620
Q13625	TP53BP2	Apoptosis-stimulating of p53 protein 2	27.9497	27.8625	27.8284	28.7	28.3931	28.6526	27.3794	27.1445	27.4607	-1.2537	0.000736972				+	+	FB-P_Ctrl;P-BF_Ctrl	23	23	22	30.5	30.5	29.8	125.61	0	140.21	3824300000	219	2.63089	0.00120843	0.701677	6.87944	2.25683	0.00136876	-0.55201	-5.44202	Q13625
Q13724	MOGS	Mannosyl-oligosaccharide glucosidase	28.2792	27.7699	27.5832	26.5849	26.6092	26.7848	27.8495	27.591	27.4612	0.974267	0.00171292				+		FB-P_Ctrl	14	14	14	22.3	22.3	22.3	91.916	0	40.93	2261200000	118	2.30279	0.00144106	-1.21778	-5.60383	0.440463	0.235981	-0.24353	-1.02646	Q13724
Q13813	SPTAN1	Spectrin alpha chain, non-erythrocytic 1	27.0639	26.8642	26.8235	Not detected	Not detected	Not detected	Not detected	26.042	25.8985	#DIV/0!	#DIV/0!					+	P-BF_Ctrl	19	19	19	10.7	10.7	10.7	284.54	0	31.188	1510700000	45	0	0.868691	Not detected	0	2.48391	0.000798541	-0.946944	-8.62141	Q13813
Q13823	GNL2	Nucleolar GTP-binding protein 2	29.7937	29.7182	29.7159	29.2956	29.0068	29.2547	29.6559	29.5459	29.5881	0.410933	0.0127267				+	+	FB-P_Ctrl;P-BF_Ctrl	25	25	25	35.2	35.2	35.2	83.654	0	161.36	10706000000	326	2.39427	0.00151297	-0.556902	-5.93764	1.62717	0.00455111	-0.145928	-3.55955	Q13823
Q13838	DDX39B	Spliceosome RNA helicase DDX39B	30.8936	30.8062	30.8012	29.2612	29.5378	29.5301	29.4394	29.21	29.3434	-0.1121	0.376086				+	+	FB-P_Ctrl;P-BF_Ctrl	16	16	5	39.3	39.3	18	48.991	0	132.89	21478000000	470	3.88342	0	-1.39063	-14.5208	4.48372	0	-1.50275	-20.5953	Q13838
Q13868	EXOSC2	Exosome complex component RRP4	27.6877	27.5945	27.5513	28.2207	28.0213	28.0107	27.7866	27.8574	27.7805	-0.276067	0.019082				+	+	FB-P_Ctrl;P-BF_Ctrl	10	10	10	49.5	49.5	49.5	32.789	0	165.22	2880000000	147	2.40215	0.00152515	0.473089	5.96715	1.85365	0.00346685	0.19701	4.17213	Q13868
Q13895	BYSL	Bystin	27.9604	27.7093	27.5129	25.4672	25.8174	25.9852	26.132	26.9901	26.0909	0.647733	0.121544				+	+	FB-P_Ctrl;P-BF_Ctrl	8	8	8	24.5	24.5	24.5	49.601	0	30.199	2570800000	61	3.2246	0.000182857	-1.97095	-9.84845	1.83852	0.00353783	-1.32321	-4.12917	Q13895
Q13907	IDI1	Isopentenyl-diphosphate Delta-isomerase 1	26.2982	26.072	25.9879	25.5953	Not detected	25.7307	24.9015	25.4591	24.7366	-0.6306	0.11521					+	P-BF_Ctrl	6	6	6	29.1	29.1	29.1	26.319	0	78.766	814550000	60	1.40863	0.0104768	-0.456382	-3.51608	1.99163	0.00270357	-1.08697	-4.57855	Q13907
Q14004	CDK13	Cyclin-dependent kinase 13	24.6725	24.6717	24.5933	25.8437	25.1916	25.8053	25.5261	25.24	25.5227	-0.183933	0.471464				+	+	FB-P_Ctrl;P-BF_Ctrl	11	7	7	12.8	10.1	10.1	164.92	0	12.458	333360000	23	1.98078	0.0027186	0.967705	4.5456	2.87141	0.000108967	0.78378	7.96744	Q14004
Q14008	CKAP5	Cytoskeleton-associated protein 5	30.8426	30.8415	30.7877	30.7057	30.6075	30.6167	29.8918	29.6926	29.7556	-0.8633	0.000204389				+	+	FB-P_Ctrl;P-BF_Ctrl	58	58	58	34.3	34.3	34.3	225.49	0	323.31	24345000000	665	2.12324	0.00239045	-0.18064	-4.99268	4.15081	0	-1.04395	-16.9725	Q14008
Q14011	CIRBP	Cold-inducible RNA-binding protein	28.5358	28.4565	28.4001	27.1267	27.006	26.8399	27.8206	27.8022	27.8329	0.8277	0.000584518				+	+	FB-P_Ctrl;P-BF_Ctrl	5	5	5	39	39	39	18.648	0	167.56	3483000000	95	4.05121	0	-1.47325	-16.0154	4.04933	0	-0.645582	-15.9979	Q14011
Q14103	HNRNPD	Heterogeneous nuclear ribonucleoprotein D0	31.1194	31.0902	31.0627	30.8005	31.046	31.1418	31.3494	31.4331	31.4003	0.398167	0.0189433					+	P-BF_Ctrl	13	13	12	36.3	36.3	34.1	38.434	0	323.31	29810000000	383	0.387322	0.34914	-0.094642	-0.919427	3.3071	0	0.303487	10.3435	Q14103
Q14126	DSG2	Desmoglein-2	27.5518	27.5244	27.4363	26.7473	26.5376	26.7212	26.4105	26.3305	26.4838	-0.260433	0.0305664				+	+	FB-P_Ctrl;P-BF_Ctrl	14	14	14	20.2	20.2	20.2	122.29	0	38.574	2416300000	94	3.44124	0.000235294	-0.83551	-11.1986	4.38562	0	-1.0959	-19.4554	Q14126
Q14137	BOP1	Ribosome biogenesis protein BOP1	26.1585	26.0995	25.9216	25.6011	25.5514	25.6847	25.0005	25.281	25.3789	-0.392267	0.0307261				+	+	FB-P_Ctrl;P-BF_Ctrl	6	6	6	13.3	13.3	13.3	83.629	0	65.469	544990000	39	2.27784	0.00152985	-0.447473	-5.5155	2.48157	0.000796364	-0.839774	-6.27144	Q14137
Q14145	KEAP1	Kelch-like ECH-associated protein 1	29.8554	29.8079	29.7555	28.9358	28.4624	28.6374	28.4546	28.3044	28.2586	-0.339333	0.0869613				+	+	FB-P_Ctrl;P-BF_Ctrl	17	17	17	30.8	30.8	30.8	69.666	0	116.59	9225900000	217	2.87557	0.000547486	-1.12773	-7.98752	4.61916	0	-1.46706	-22.2779	Q14145
Q14151	SAFB2	Scaffold attachment factor B2	30.3151	30.2966	30.1812	29.8398	29.805	29.8273	30.1946	30.2584	30.2517	0.410867	5.4378e-05				+		FB-P_Ctrl	25	25	18	32.4	32.4	23.4	107.47	0	323.31	16513000000	509	3.28554	0.000195122	-0.44024	-10.2119	0.249919	0.652993	-0.0293503	-0.630751	Q14151
Q14152	EIF3A	Eukaryotic translation initiation factor 3 subunit A	29.8514	29.8432	29.8351	29.1951	29.1633	29.3955	28.8362	28.7877	28.9159	-0.4047	0.00775101				+	+	FB-P_Ctrl;P-BF_Ctrl	41	41	41	32.7	32.7	32.7	166.57	0	203.63	14138000000	360	2.90374	0.00056241	-0.591921	-8.12483	4.91644	0	-0.996638	-26.4616	Q14152
Q14157	UBAP2L	Ubiquitin-associated protein 2-like	31.3564	31.3503	31.3411	30.243	30.2469	30.2541	30.2775	30.3814	30.4136	0.1095	0.0565003				+	+	FB-P_Ctrl;P-BF_Ctrl	23	23	23	37.1	37.1	37.1	114.53	0	323.31	37669000000	737	8.42305	0	-1.10127	-199.656	4.74886	0	-0.991754	-24.0161	Q14157
Q14160	SCRIB	Protein scribble homolog	27.7485	27.6271	27.623	26.6013	26.6085	26.6176	26.244	25.5258	26.2455	-0.604033	0.0653575				+	+	FB-P_Ctrl;P-BF_Ctrl	22	22	22	21	21	21	174.88	0	103.62	2921400000	153	4.85332	0	-1.05704	-25.5129	2.61942	0.000667313	-1.66109	-6.831	Q14160;Q9BTT6
Q14165	MLEC	Malectin	26.5233	26.3599	26.1829	25.4229	25.2404	25.3517	Not detected	Not detected	Not detected	#DIV/0!	#DIV/0!				+		FB-P_Ctrl	6	6	6	29.5	29.5	29.5	32.233	0	18.889	924100000	46	3.09273	0.000159734	-1.01703	-9.10293	0	1	Not detected	0	Q14165
Q14186	TFDP1	Transcription factor Dp-1	27.761	27.7423	27.6772	28.0427	28.2349	28.3842	27.8494	27.8166	27.9214	-0.358133	0.0258708				+	+	FB-P_Ctrl;P-BF_Ctrl	7	7	7	28.5	28.5	28.5	45.07	0	75.871	3012200000	86	2.07488	0.00233278	0.49375	4.83734	1.55882	0.00532922	0.135626	3.38659	Q14186
Q14194	CRMP1	Dihydropyrimidinase-related protein 1	27.9284	27.7757	27.7317	26.876	26.8318	26.1442	26.1463	26.7729	26.0112	-0.3072	0.409036				+	+	FB-P_Ctrl;P-BF_Ctrl	15	11	11	38.8	31.1	31.1	62.183	0	36.594	2881100000	81	2.09138	0.00234448	-1.1946	-4.88991	2.46399	0.00078777	-1.5018	-6.203	Q14194
Q14195	DPYSL3	Dihydropyrimidinase-related protein 3	30.3952	30.3895	30.3694	30.3213	29.984	30.036	28.9824	29.0624	28.9939	-1.10087	0.00051773					+	P-BF_Ctrl	24	20	18	57.7	48.8	46.3	61.963	0	253.59	19759000000	489	1.21087	0.0171109	-0.270912	-2.57679	6.10012	0	-1.37178	-52.3967	Q14195;Q14117
Q14203	DCTN1	Dynactin subunit 1	28.5849	28.5811	28.5634	28.1392	28.0255	27.9261	27.8425	27.5256	27.4444	-0.4261	0.0352071				+	+	FB-P_Ctrl;P-BF_Ctrl	26	26	26	26.5	26.5	26.5	141.69	0	223.23	5889300000	187	3.04092	0.000479233	-0.546178	-8.82457	2.87704	0.000109091	-0.972296	-7.99465	Q14203
Q14204	DYNC1H1	Cytoplasmic dynein 1 heavy chain 1	29.7794	29.7521	29.5692	28.7388	28.9076	28.8535	28.6283	28.7223	28.668	-0.160433	0.0474494				+	+	FB-P_Ctrl;P-BF_Ctrl	79	79	79	21.6	21.6	21.6	532.4	0	323.31	10622000000	486	3.33031	0.000205128	-0.866926	-10.4869	3.86763	0	-1.02736	-14.3873	Q14204
Q14207	NPAT	Protein NPAT	25.4194	25.3469	25.0817	26.9779	Not detected	26.2853	25.9956	25.8931	25.7861	-0.74	0.0710926				+	+	FB-P_Ctrl;P-BF_Ctrl	10	10	10	7.8	7.8	7.8	154.29	0	15.154	544640000	18	1.72674	0.00465906	1.34898	4.64957	2.15952	0.00182831	0.60894	5.1117	Q14207
Q14232	EIF2B1	Translation initiation factor eIF-2B subunit alpha	25.795	25.7723	25.2822	24.4336	24.6797	Not detected	Not detected	24.7403	Not detected	0.18365	#DIV/0!				+		FB-P_Ctrl	7	7	7	23.6	23.6	23.6	33.712	0	9.0792	398540000	19	1.69299	0.00495144	-1.05985	-4.51754	0	1	-0.876186	0	Q14232
Q14241	TCEB3	Transcription elongation factor B polypeptide 3	29.4834	29.2846	29.2511	28.701	28.44	28.5323	28.8901	28.6852	28.6935	0.1985	0.122429				+	+	FB-P_Ctrl;P-BF_Ctrl	15	15	15	23.8	23.8	23.8	89.908	0	287.6	7480100000	225	2.75494	0.000762148	-0.781963	-7.42288	2.38725	0.000924399	-0.583431	-5.91145	Q14241
Q14244	MAP7	Ensconsin	27.9832	27.5199	27.439	25.9113	26.3675	26.7466	26.8604	27.1317	27.0144	0.660367	0.0600106				+	+	FB-P_Ctrl;P-BF_Ctrl	9	9	9	13.4	13.4	13.4	84.051	0	42.897	2472000000	67	1.94056	0.00282463	-1.30554	-4.42495	1.58533	0.0048725	-0.645178	-3.45305	Q14244
Q14247	CTTN	Src substrate cortactin	33.4485	33.44	33.4026	33.3076	33.3128	33.2362	32.1531	32.0317	32.0564	-1.20513	1.10829e-05				+	+	FB-P_Ctrl;P-BF_Ctrl	32	32	32	51.5	51.5	51.5	61.585	0	323.31	1650200000000000	1308	2.15323	0.00224676	-0.144829	-5.09089	5.35335	0	-1.34997	-34.0607	Q14247
Q14254	FLOT2	Flotillin-2	28.44	28.3168	28.115	26.7632	26.4952	Not detected	27.7817	26.73	26.7347	0.452933	0.399631				+	+	FB-P_Ctrl;P-BF_Ctrl	13	13	13	37.9	37.9	37.9	47.064	0	31.581	3587400000	49	2.73664	0.00075063	-1.66138	-10.5209	1.53792	0.00561326	-1.20847	-3.33469	Q14254
Q14258	TRIM25	E3 ubiquitin/ISG15 ligase TRIM25	30.2752	30.2582	30.2474	30.0469	30.089	30.0664	29.5568	29.5637	29.5912	-0.496867	6.52602e-06				+	+	FB-P_Ctrl;P-BF_Ctrl	19	19	19	33.3	33.3	33.3	70.973	0	166.71	18420000000	419	3.71859	0	-0.192841	-13.1846	6.08857	0	-0.689717	-52.0491	Q14258
Q14320	FAM50A	Protein FAM50A	29.5658	29.4399	29.398	30.4832	30.4845	30.3843	30.0994	30.2167	30.2186	-0.272433	0.00614103				+	+	FB-P_Ctrl;P-BF_Ctrl	13	13	13	44.2	44.2	44.2	40.241	0	92.573	10375000000	162	4.07956	0	0.98282	16.2823	3.42581	0	0.710373	11.0969	Q14320;Q9Y247
Q14444	CAPRIN1	Caprin-1	29.6981	29.2885	29.1193	28.5695	28.2352	28.309	28.7688	29.1425	29.0031	0.600233	0.0157165				+		FB-P_Ctrl	13	13	13	28.3	28.3	28.3	78.365	0	62.778	7240200000	205	2.12525	0.00231399	-0.997398	-4.99919	0.911134	0.0335791	-0.397167	-1.95178	Q14444
Q14498	RBM39	RNA-binding protein 39	28.9111	28.8484	28.7541	28.274	28.3101	28.3726	28.8178	28.8024	28.7486	0.4707	0.000189694				+		FB-P_Ctrl	12	12	11	35.3	35.3	32.3	59.379	0	323.31	5486700000	196	3.18517	0.000175503	-0.518948	-9.6198	0.407429	0.281774	-0.0482241	-0.960143	Q14498
Q14558	PRPSAP1	Phosphoribosyl pyrophosphate synthase-associated protein 1	24.6651	24.6347	24.6087	24.389	Not detected	Not detected	Not detected	24.1514	24.0057	-0.31045	#DIV/0!					+	P-BF_Ctrl	5	4	4	19.7	15.7	15.7	39.393	0	10.848	278360000	26	0	0.879534	-0.247131	0	2.61723	0.000666021	-0.55762	-9.57866	Q14558
Q14562	DHX8	ATP-dependent RNA helicase DHX8	27.9411	27.8632	27.8286	28.3353	28.3662	28.543	28.6113	28.4035	28.4423	0.0708667	0.47899				+	+	FB-P_Ctrl;P-BF_Ctrl	27	26	26	29.8	29.1	29.1	139.31	0	88.679	3330700000	142	2.74667	0.000757306	0.537242	7.38551	2.96907	0.000115246	0.608097	8.45152	Q14562
Q14566	MCM6	DNA replication licensing factor MCM6	29.3453	29.21	29.1612	29.0043	28.7024	28.9572	28.8969	28.6285	28.7348	-0.134567	0.331912				+	+	FB-P_Ctrl;P-BF_Ctrl	23	23	23	30.7	30.7	30.7	92.888	0	178.32	8371700000	279	1.49359	0.00872611	-0.350875	-3.22614	2.15063	0.00191975	-0.485431	-5.08232	Q14566
Q14651	PLS1	Plastin-1	27.3043	27.3017	27.2372	26.7351	26.6088	26.6068	25.9824	25.7494	25.8319	-0.795667	0.000583255				+	+	FB-P_Ctrl;P-BF_Ctrl	14	11	11	30.4	24.8	24.8	70.253	0	37.393	2245800000	65	3.72155	0	-0.630833	-13.2075	4.42582	0	-1.42649	-19.9148	Q14651
Q14669	TRIP12	E3 ubiquitin-protein ligase TRIP12	26.7238	26.6506	26.6351	25.403	25.2871	25.4545	26.1843	26.4729	26.1324	0.881667	0.00165616				+	+	FB-P_Ctrl;P-BF_Ctrl	13	13	13	8.9	8.9	8.9	220.43	0	56.076	1349600000	87	4.65771	0	-1.28832	-22.7812	1.68754	0.00429793	-0.406597	-3.71671	Q14669
Q14676	MDC1	Mediator of DNA damage checkpoint protein 1	31.3164	31.2031	31.1478	31.0333	30.9276	30.9748	31.0415	30.8638	30.7791	-0.0837667	0.370689				+	+	FB-P_Ctrl;P-BF_Ctrl	47	47	47	41.5	41.5	41.5	226.66	0	323.31	30147000000	1050	1.85773	0.0031366	-0.243855	-4.18376	1.62947	0.00449873	-0.327618	-3.56545	Q14676
Q14677	CLINT1	Clathrin interactor 1	31.6809	31.629	31.5147	31.5101	31.5653	31.5644	31.1001	30.7413	30.8878	-0.636867	0.00382893					+	P-BF_Ctrl	23	23	23	33.6	33.6	33.6	68.259	0	323.31	42659000000	615	0.515886	0.190888	-0.061573	-1.17583	2.42835	0.000947183	-0.698423	-6.06614	Q14677
Q14683	SMC1A	Structural maintenance of chromosomes protein 1A	29.5551	29.5313	29.4177	28.6405	28.8662	28.8723	29.0221	28.7692	29.0827	0.165	0.249624				+	+	FB-P_Ctrl;P-BF_Ctrl	35	35	35	30.8	30.8	30.8	143.23	0	171.79	9800400000	327	2.90189	0.00056	-0.708342	-8.11576	2.17934	0.00176526	-0.543355	-5.17767	Q14683
Q14684	RRP1B	Ribosomal RNA processing protein 1 homolog B	31.1938	31.1294	31.0525	29.6525	29.5655	29.6214	30.3363	30.3795	30.2629	0.7131	7.39323e-05				+	+	FB-P_Ctrl;P-BF_Ctrl	27	27	27	46.4	46.4	46.4	84.427	0	231.27	25079000000	544	5.21389	0	-1.51213	-31.4253	3.94252	0	-0.799021	-15.0311	Q14684
Q14686	NCOA6	Nuclear receptor coactivator 6	27.3221	27.2677	27.2554	28.5454	28.3454	28.621	29.636	29.1496	29.4817	0.9185	0.00514463				+	+	FB-P_Ctrl;P-BF_Ctrl	22	22	22	18.6	18.6	18.6	219.14	0	104.98	2877900000	140	3.87175	0	1.22222	14.4221	3.91238	0	2.1407	14.7687	Q14686
Q14687	GSE1	Genetic suppressor element 1	27.0044	26.9724	26.8748	28.5196	28.278	28.5362	28.8686	28.7348	28.7464	0.338667	0.0225259				+	+	FB-P_Ctrl;P-BF_Ctrl	18	18	18	25.6	25.6	25.6	136.16	0	94.566	2049800000	127	4.07343	0	1.49411	16.2243	5.22662	0	1.83275	31.6572	Q14687
Q14690	PDCD11	Protein RRP5 homolog	27.831	27.7608	27.6501	26.0906	26.3589	26.1789	27.1879	27.2027	27.1561	0.972767	0.000264221				+	+	FB-P_Ctrl;P-BF_Ctrl	22	22	22	15.2	15.2	15.2	208.7	0	46.255	2521200000	99	4.07153	0	-1.53788	-16.2063	3.31362	0	-0.565133	-10.3836	Q14690
Q14691	GINS1	DNA replication complex GINS protein PSF1	25.7578	25.6936	25.6768	Not detected	26.219	26.3802	25.9107	25.7824	25.9108	-0.431633	0.0131847				+	+	FB-P_Ctrl;P-BF_Ctrl	3	3	3	18.4	18.4	18.4	22.988	0	73.01	514990000	20	2.49271	0.00120085	0.590237	8.68175	1.48686	0.00646191	0.158592	3.20982	Q14691
Q14692	BMS1	Ribosome biogenesis protein BMS1 homolog	28.0979	27.9638	27.9091	27.4008	27.0971	26.8421	27.8371	27.8262	27.5831	0.635467	0.024881				+		FB-P_Ctrl	21	21	21	21.3	21.3	21.3	145.81	0	111.69	3401300000	145	2.16499	0.0021584	-0.87697	-5.12983	1.13456	0.0165733	-0.241463	-2.4125	Q14692
Q14694	USP10	Ubiquitin carboxyl-terminal hydrolase 10	28.7824	28.7513	28.7426	27.9858	27.9387	27.8159	27.9487	27.7348	27.9354	-0.0405	0.661301				+	+	FB-P_Ctrl;P-BF_Ctrl	14	14	14	24.2	24.2	24.2	87.133	0	72.617	6105600000	231	4.07391	0	-0.845304	-16.2288	3.64304	0	-0.885817	-12.6125	Q14694
Q14739	LBR	Lamin-B receptor	31.7954	31.7684	31.7386	30.1267	29.8673	29.7187	30.3121	30.2239	30.3948	0.406033	0.0346169				+	+	FB-P_Ctrl;P-BF_Ctrl	16	16	16	23.7	23.7	23.7	70.702	0	235.53	41794000000	448	3.99335	0	-1.86323	-15.4839	5.01577	0	-1.4572	-28.026	Q14739
Q14781	CBX2	Chromobox protein homolog 2	24.7977	24.7016	24.6684	24.9411	24.6564	24.8207	25.2493	25.2609	25.0532	0.381733	0.0230983					+	P-BF_Ctrl	5	5	5	12.4	12.4	12.4	56.08	0	7.3531	253650000	24	0.385873	0.351064	0.0835482	0.916481	2.40676	0.000934028	0.46527	5.98447	Q14781
Q147X3	NAA30	N-alpha-acetyltransferase 30	25.9703	25.6684	25.6532	24.6704	Not detected	26.1639	Not detected	25.3274	25.1903	-0.1583	0.852367					+	P-BF_Ctrl	5	5	5	22.4	22.4	22.4	39.319	0	20.428	560220000	31	0.23115	0.689544	-0.346844	-0.606012	1.41556	0.00759174	-0.505143	-3.53832	Q147X3
Q14807	KIF22	Kinesin-like protein KIF22	26.6108	26.2091	26.0017	25.6792	25.6269	25.518	25.7582	25.7803	25.6144	0.1096	0.194621				+	+	FB-P_Ctrl;P-BF_Ctrl	9	9	9	20.3	20.3	20.3	73.261	0	24.759	749450000	41	1.64256	0.00553022	-0.665819	-3.59921	1.39299	0.00796249	-0.556197	-2.98697	Q14807
Q14814	MEF2D	Myocyte-specific enhancer factor 2D	28.0959	28.0755	27.9829	29.3736	29.1749	29.2436	29.4352	29.4421	29.3807	0.1553	0.0647501				+	+	FB-P_Ctrl;P-BF_Ctrl	9	9	7	25.3	25.3	21.1	55.937	0	188.89	4413100000	145	4.2396	0	1.21258	17.8725	5.3687	0	1.3679	34.3637	Q14814
Q14847	LASP1	LIM and SH3 domain protein 1	29.335	29.2688	29.1414	28.3017	28.8247	28.6024	27.0491	27.2563	27.3562	-1.35573	0.00154407				+	+	FB-P_Ctrl;P-BF_Ctrl	10	10	10	59.8	59.8	59.8	29.717	0	142.11	7225000000	142	1.84715	0.00311778	-0.672153	-4.15363	4.34364	0	-2.02792	-18.9867	Q14847
Q14966	ZNF638	Zinc finger protein 638	28.996	28.944	28.9354	28.8811	28.7271	28.7785	29.1921	28.8224	29.0718	0.2332	0.119096				+		FB-P_Ctrl	32	32	32	21.3	21.3	21.3	220.62	0	144.76	6987000000	225	1.53183	0.00789777	-0.162876	-3.31965	0.25253	0.646976	0.0703341	0.63646	Q14966
Q14974	KPNB1	Importin subunit beta-1	30.9434	30.7737	30.7409	30.1592	30.5834	30.6088	30.0735	29.851	29.997	-0.476633	0.040599					+	P-BF_Ctrl	25	25	25	34.7	34.7	34.7	97.169	0	323.31	26230000000	493	1.09236	0.0241074	-0.36886	-2.32332	3.13525	0	-0.845504	-9.33739	Q14974
Q14978	NOLC1	Nucleolar and coiled-body phosphoprotein 1	30.8963	30.8747	30.7789	27.475	27.8606	27.9821	Not detected	26.5539	26.7617	-1.11477	0.0133985				+	+	FB-P_Ctrl;P-BF_Ctrl	12	12	12	18.6	18.6	18.6	73.602	0	310.1	13158000000	142	4.39777	0	-3.07742	-19.5931	4.65685	0	-4.19219	-46.4015	Q14978
Q14980	NUMA1	Nuclear mitotic apparatus protein 1	30.3151	30.2674	30.1862	30.4082	30.5093	30.5548	31.167	30.9466	30.9391	0.5268	0.00365935				+	+	FB-P_Ctrl;P-BF_Ctrl	69	69	69	41.7	41.7	41.7	238.26	0	323.31	16775000000	584	1.82412	0.00322428	0.234533	4.08856	3.09213	0	0.761333	9.09968	Q14980
Q14C86	GAPVD1	GTPase-activating protein and VPS9 domain-containing protein 1	29.5999	29.5315	29.5008	29.0947	28.7731	28.8593	28.5137	28.1357	28.2664	-0.603767	0.0146654				+	+	FB-P_Ctrl;P-BF_Ctrl	30	30	30	28	28	28	164.98	0	171.61	10634000000	321	2.49426	0.00120343	-0.635048	-6.32126	3.38074	0	-1.23879	-10.8049	Q14C86
Q15003	NCAPH	Condensin complex subunit 2	28.6213	28.584	28.5679	28.4278	28.2586	28.1679	27.8886	27.6838	27.8527	-0.4764	0.00855028				+	+	FB-P_Ctrl;P-BF_Ctrl	18	18	18	30.9	30.9	30.9	82.562	0	114.1	5400800000	139	1.77009	0.00406967	-0.306318	-3.93866	3.56182	0	-0.78273	-12.0241	Q15003
Q15006	EMC2	ER membrane protein complex subunit 2	25.8718	25.7448	25.7024	Not detected	Not detected	Not detected	24.6768	24.6567	Not detected	#DIV/0!	#DIV/0!					+	P-BF_Ctrl	5	5	5	22.6	22.6	22.6	34.833	0	21.18	472260000	18	0	0.880909	Not detected	0	3.33274	0	-1.10629	-16.7322	Q15006
Q15007	WTAP	Pre-mRNA-splicing regulator WTAP	25.1131	24.9136	24.7968	25.2447	25.4486	25.3947	26.2399	25.7545	25.8783	0.5949	0.0196379				+	+	FB-P_Ctrl;P-BF_Ctrl	5	5	5	16.2	16.2	16.2	44.243	0	20.271	317820000	17	1.72191	0.00472934	0.421471	3.80809	2.38256	0.00103004	1.01638	5.89403	Q15007
Q15008	PSMD6	26S proteasome non-ATPase regulatory subunit 6	27.9928	27.9578	27.9181	27.3891	27.6576	27.6541	26.7205	26.9932	26.9478	-0.679767	0.00517042				+	+	FB-P_Ctrl;P-BF_Ctrl	15	15	15	38.6	38.6	38.6	45.531	0	50.367	2966600000	121	1.88235	0.00300304	-0.389283	-4.25444	3.59729	0	-1.06905	-12.2778	Q15008
Q15014	MORF4L2	Mortality factor 4-like protein 2	28.6307	27.6773	27.6027	26.3231	25.2982	26.3891	27.0877	27.1799	27.1272	1.12813	0.0333621				+		FB-P_Ctrl	10	8	8	36.1	27.4	27.4	32.307	0	30.45	2271600000	62	1.81529	0.00335598	-1.9668	-4.06381	1.18744	0.0145839	-0.838644	-2.5259	Q15014
Q15018	FAM175B	BRISC complex subunit Abro1	26.1578	25.9504	25.9022	25.5814	26.0227	25.9308	25.1781	25.1092	Not detected	-0.701317	0.0280523					+	P-BF_Ctrl	6	6	6	22.7	22.7	22.7	46.9	0	10.036	821070000	26	0.436428	0.274622	-0.158504	-1.01839	2.42541	0.00094635	-0.859829	-8.23041	Q15018
Q15019	SEPT2	Septin-2	30.8591	30.7705	30.6895	30.2758	30.3148	30.3638	29.7078	29.9421	29.9621	-0.447467	0.00637234				+	+	FB-P_Ctrl;P-BF_Ctrl	15	15	15	56.8	56.8	56.8	41.487	0	323.31	23562000000	536	2.92731	0.000437318	-0.454912	-8.24136	3.16045	0	-0.902376	-9.479	Q15019
Q15020	SART3	Squamous cell carcinoma antigen recognized by T-cells 3	30.1814	29.9631	29.9628	31.194	30.8791	31.0184	30.9848	30.7624	30.9086	-0.145233	0.264697				+	+	FB-P_Ctrl;P-BF_Ctrl	33	33	33	36.6	36.6	36.6	109.93	0	323.31	18056000000	565	2.98443	0.000460123	0.994738	8.53003	3.01492	0	0.849536	8.68786	Q15020
Q15022	SUZ12	Polycomb protein SUZ12	25.5671	25.2926	25.257	Not detected	Not detected	Not detected	24.8943	24.8331	24.8331	#DIV/0!	#DIV/0!					+	P-BF_Ctrl	6	6	6	15.2	15.2	15.2	83.054	0	9.3494	450090000	24	0	0.881202	Not detected	0	2.1813	0.00166954	-0.518737	-5.1842	Q15022
Q15024	EXOSC7	Exosome complex component RRP42	27.5555	27.4011	27.3732	27.4899	27.265	27.5793	27.2352	27.0197	27.2569	-0.274133	0.0849178					+	P-BF_Ctrl	5	5	5	22.3	22.3	22.3	31.821	0	68.137	2348600000	100	0.00444681	1	0.00148519	0.0135831	1.34795	0.0093117	-0.272669	-2.88294	Q15024
Q15025	TNIP1	TNFAIP3-interacting protein 1	27.1321	27.1096	27.0791	26.6882	26.1841	26.9945	25.7972	25.7045	25.6767	-0.896133	0.0199679					+	P-BF_Ctrl	8	8	8	15.4	15.4	15.4	71.863	0	39.967	1497400000	29	0.958364	0.036828	-0.484655	-2.04702	5.39717	0	-1.38081	-34.9331	Q15025
Q15029	EFTUD2	116 kDa U5 small nuclear ribonucleoprotein component	30.7064	30.6746	30.6699	31.3837	31.133	31.2448	31.5004	31.2147	31.274	0.0758667	0.539757				+	+	FB-P_Ctrl;P-BF_Ctrl	37	37	36	51.2	51.2	50.2	109.43	0	323.31	27928000000	751	2.82968	0.000672043	0.570159	7.76836	2.74036	0.000300211	0.646009	7.35712	Q15029
Q15046	KARS	Lysine--tRNA ligase	27.9713	27.7353	27.6387	26.7626	26.8801	26.7586	27.0811	26.5663	26.6602	-0.0312333	0.857573				+	+	FB-P_Ctrl;P-BF_Ctrl	14	14	14	27	27	27	68.047	0	90.495	2903000000	130	3.11288	0.000162437	-0.981327	-9.21335	2.25237	0.00136218	-1.01256	-5.4265	Q15046
Q15050	RRS1	Ribosome biogenesis regulatory protein homolog	25.8859	25.7875	25.7078	24.6978	24.7784	24.6227	24.4449	24.9666	24.9808	0.0978	0.619434				+	+	FB-P_Ctrl;P-BF_Ctrl	4	4	4	15.6	15.6	15.6	41.193	0	132.09	587420000	66	4.05049	0	-1.09408	-16.0087	2.25155	0.00136109	-0.996283	-5.42366	Q15050
Q15054	POLD3	DNA polymerase delta subunit 3	26.5314	26.2827	26.2539	27.7565	27.6514	27.6972	27.7778	27.6203	27.6429	-0.0213667	0.730456				+	+	FB-P_Ctrl;P-BF_Ctrl	5	5	5	14.4	14.4	14.4	51.4	0	22.18	1218300000	52	3.87387	0	1.34573	14.4399	3.71111	0	1.32432	13.1268	Q15054
Q15056	EIF4H	Eukaryotic translation initiation factor 4H	29.6659	29.4266	29.0612	28.8523	29.0823	29.1606	28.4471	28.4346	28.2863	-0.6424	0.00373701					+	P-BF_Ctrl	8	8	8	45.6	45.6	45.6	27.385	0	168.04	7340800000	150	0.822745	0.0568177	-0.352836	-1.77589	2.25359	0.00136437	-0.995222	-5.43076	Q15056
Q15059	BRD3	Bromodomain-containing protein 3	30.2009	29.9133	29.8841	29.7047	29.4996	29.5838	29.9436	29.7185	29.6472	0.173733	0.180847				+		FB-P_Ctrl	13	9	9	25.3	20	20	79.541	0	22.152	12927000000	66	1.57934	0.00664	-0.403362	-3.43796	0.785311	0.0527733	-0.22964	-1.70215	Q15059
Q15061	WDR43	WD repeat-containing protein 43	28.0419	27.7221	27.7069	25.9495	25.8634	26.3179	26.9421	27.0053	26.6388	0.818467	0.0103426				+	+	FB-P_Ctrl;P-BF_Ctrl	8	8	8	21	21	21	74.89	0	72.287	1679800000	41	3.25873	0.000188605	-1.78003	-10.0505	2.44111	0.000953901	-0.961562	-6.11486	Q15061
Q15084	PDIA6	Protein disulfide-isomerase A6	27.5643	27.5221	27.4502	25.9713	25.7948	25.938	26.5133	26.2636	26.491	0.521267	0.00566769				+	+	FB-P_Ctrl;P-BF_Ctrl	9	9	9	37.5	37.5	37.5	48.121	0	70.94	2130800000	106	4.84182	0	-1.61082	-25.3436	3.6422	0	-1.08954	-12.6063	Q15084
Q15121	PEA15	Astrocytic phosphoprotein PEA-15	27.3541	27.2162	27.193	Not detected	26.135	25.9951	24.401	24.5797	Not detected	-1.5747	0.00515268				+	+	FB-P_Ctrl;P-BF_Ctrl	5	5	5	44.6	44.6	44.6	15.04	0	19.237	1408900000	61	3.12879	0.000165803	-1.18938	-14.2851	4.07757	0	-2.76406	-29.7229	Q15121
Q15154	PCM1	Pericentriolar material 1 protein	28.6254	28.5714	28.5297	28.4295	28.2311	27.9694	27.7306	27.1134	27.7899	-0.665367	0.0588518					+	P-BF_Ctrl	26	26	26	16.3	16.3	16.3	228.54	0	131.34	4999500000	161	1.26068	0.014408	-0.365504	-2.6863	2.03997	0.00253412	-1.0309	-4.72753	Q15154
Q15181	PPA1	Inorganic pyrophosphatase	30.7015	30.4147	30.3873	29.0529	29.2146	29.1108	29.0277	28.9208	29.0889	-0.113633	0.170971				+	+	FB-P_Ctrl;P-BF_Ctrl	16	16	16	61.9	61.9	61.9	32.66	0	151.28	15898000000	311	3.6117	0	-1.37507	-12.3823	3.7348	0	-1.48868	-13.3105	Q15181
Q15208	STK38	Serine/threonine-protein kinase 38	29.1084	28.9884	28.8883	29.6822	29.8318	29.7147	29.4674	29.35	29.52	-0.2971	0.0118209				+	+	FB-P_Ctrl;P-BF_Ctrl	15	15	15	40.2	40.2	40.2	54.19	0	114.41	7642400000	290	3.17564	0.000174229	0.747866	9.56531	2.29051	0.00139002	0.450778	5.56021	Q15208
Q15233	NONO	Non-POU domain-containing octamer-binding protein	33.7287	33.6055	33.5663	33.8978	33.8254	34.0831	34.305	34.4033	34.4522	0.4514	0.00686836				+	+	FB-P_Ctrl;P-BF_Ctrl	29	28	27	54.4	52.7	52.7	54.231	0	323.31	2164500000000000	1990	1.53101	0.00802358	0.301952	3.31764	3.49041	0	0.753335	11.5285	Q15233
Q15269	PWP2	Periodic tryptophan protein 2 homolog	25.9279	25.9218	25.7922	25.0199	25.0081	Not detected	25.5616	26.1764	25.4822	0.726067	0.0829633				+		FB-P_Ctrl	5	5	5	8.3	8.3	8.3	102.45	0	71.005	529050000	19	3.20242	0.000179439	-0.866611	-15.1252	0.248663	0.655649	-0.140551	-0.628001	Q15269
Q15287	RNPS1	RNA-binding protein with serine-rich domain 1	28.2671	28.1984	28.1766	29.0832	28.8825	29.0634	29.0111	28.728	28.7716	-0.1728	0.187207				+	+	FB-P_Ctrl;P-BF_Ctrl	6	6	6	25.6	25.6	25.6	34.208	0	210.56	5195300000	248	3.48019	0	0.795637	11.4592	2.6027	0.000662813	0.622819	6.76094	Q15287
Q15291	RBBP5	Retinoblastoma-binding protein 5	25.7332	25.4978	25.3316	26.4976	25.9227	26.1255	26.2566	26.2648	26.2155	0.0637	0.725421				+	+	FB-P_Ctrl;P-BF_Ctrl	5	5	5	13.6	13.6	13.6	59.152	0	12.564	672030000	32	1.4948	0.0086332	0.661046	3.22907	2.45482	0.000782842	0.724721	6.16755	Q15291
Q15334	LLGL1	Lethal(2) giant larvae protein homolog 1	26.6429	26.5676	26.4855	25.3177	25.8026	25.6696	25.3512	25.4842	25.5479	-0.135533	0.433513				+	+	FB-P_Ctrl;P-BF_Ctrl	8	8	8	10	10	10	115.42	0	20.529	1331700000	54	2.51122	0.00121777	-0.968713	-6.38836	3.93786	0	-1.10425	-14.9903	Q15334
Q15365	PCBP1	Poly(rC)-binding protein 1	30.3591	30.2857	30.2754	29.9595	30.121	30.1745	30.358	30.644	30.2024	0.316467	0.0937881				+		FB-P_Ctrl	10	7	7	38.8	30.9	30.9	37.497	0	287.61	19025000000	196	1.47322	0.00891545	-0.221739	-3.17693	0.290382	0.54826	0.0947609	0.718087	Q15365;P57721;P57723
Q15366	PCBP2	Poly(rC)-binding protein 2	31.4334	31.3935	31.3791	31.1134	31.0684	31.2072	31.1636	31.2977	31.2983	0.123533	0.111354				+	+	FB-P_Ctrl;P-BF_Ctrl	11	11	8	47.9	47.9	40.3	38.58	0	323.31	43665000000	471	2.46069	0.00157917	-0.272322	-6.19022	1.45046	0.00705182	-0.14882	-3.12241	Q15366
Q15369	TCEB1	Transcription elongation factor B polypeptide 1	26.7824	26.734	26.6536	26.3215	26.8707	26.804	25.9728	25.7345	25.9521	-0.778933	0.0146141					+	P-BF_Ctrl	4	4	4	45.5	45.5	45.5	12.473	0	71.811	1458500000	58	0.119296	0.896128	-0.0579618	-0.327364	3.22431	0	-0.836894	-9.84678	Q15369
Q15370	TCEB2	Transcription elongation factor B polypeptide 2	26.7146	26.5509	26.5044	25.9636	25.6579	25.843	26.0918	25.4022	25.6465	-0.108	0.650038				+	+	FB-P_Ctrl;P-BF_Ctrl	4	4	4	30.5	30.5	30.5	13.133	0	8.2676	1246200000	30	2.66501	0.00108483	-0.768516	-7.02532	1.84255	0.00354514	-0.876479	-4.14058	Q15370
Q15382	RHEB	GTP-binding protein Rheb	28.0077	27.8602	27.6204	27.5619	27.8453	27.2768	26.6513	26.7029	27.0583	-0.757167	0.0219902					+	P-BF_Ctrl	7	7	7	32.6	32.6	32.6	20.497	0	23.802	2830400000	39	0.603063	0.132574	-0.26814	-1.34635	2.41364	0.000940559	-1.02531	-6.01038	Q15382
Q15393	SF3B3	Splicing factor 3B subunit 3	31.303	31.2286	31.2232	31.783	31.5875	31.6937	31.5779	31.6345	31.7355	-0.0387667	0.62314				+	+	FB-P_Ctrl;P-BF_Ctrl	40	40	40	39.6	39.6	39.6	135.58	0	323.31	38451000000	1032	2.66618	0.00108743	0.43651	7.03036	2.77897	0.000204348	0.397704	7.53243	Q15393
Q15397	KIAA0020	Pumilio domain-containing protein KIAA0020	28.9743	28.8859	28.7622	26.7103	27.7736	27.3587	28.257	28.0012	27.8636	0.759733	0.0828489				+	+	FB-P_Ctrl;P-BF_Ctrl	13	13	13	23.3	23.3	23.3	73.584	0	62.014	5440500000	169	2.14099	0.0023279	-1.59326	-5.05064	2.50915	0.000719266	-0.833513	-6.38014	Q15397
Q15398	DLGAP5	Disks large-associated protein 5	28.5282	28.5208	28.4663	28.8355	28.7505	28.6215	28.4486	28.5777	28.4938	-0.229133	0.0346069				+		FB-P_Ctrl	22	22	22	33.6	33.6	33.6	95.114	0	181.12	5645800000	238	1.61881	0.00587228	0.230723	3.53813	0.012407	1	0.00159963	0.037563	Q15398
Q15404	RSU1	Ras suppressor protein 1	24.5757	24.4266	24.4137	23.9422	24.1654	23.9751	24.3955	24.6919	24.5095	0.504733	0.010396				+		FB-P_Ctrl	4	4	4	21.3	21.3	21.3	31.54	0	8.135	323730000	23	2.16122	0.00215278	-0.444448	-5.11735	0.235252	0.688071	0.0603046	0.598472	Q15404
Q15417	CNN3	Calponin-3	31.5363	31.48	31.3935	30.8981	31.6382	31.3743	30.896	31.0832	31.0523	-0.293033	0.261236					+	P-BF_Ctrl	14	14	13	60.5	60.5	57.1	36.413	0	323.31	43082000000	517	0.307636	0.511867	-0.1664	-0.754653	2.52495	0.000725254	-0.459384	-6.44315	Q15417
Q15427	SF3B4	Splicing factor 3B subunit 4	28.4373	28.2321	27.9373	26.7371	27.719	28.0053	25.9951	26.3792	26.7326	-1.11817	0.063546					+	P-BF_Ctrl	5	5	5	20.3	20.3	20.3	44.385	0	52.408	2875100000	63	0.805545	0.0607206	-0.715108	-1.74196	2.68541	0.000512716	-1.83326	-7.11382	Q15427
Q15428	SF3A2	Splicing factor 3A subunit 2	28.2416	28.2192	28.0946	27.7672	28.8691	28.8035	28.5321	28.5963	28.4428	0.0438	0.908938					+	P-BF_Ctrl	6	6	6	16.6	16.6	16.6	49.255	0	27.206	4428900000	89	0.338629	0.440579	0.294821	0.819474	2.2175	0.00142699	0.338601	5.30653	Q15428
Q15437	SEC23B	Protein transport protein Sec23B	26.0932	25.803	25.8005	25.3986	24.817	26.4156	25.0307	Not detected	25.1967	-0.430033	0.529275					+	P-BF_Ctrl	8	6	6	13.3	10.2	10.2	86.478	0	71.127	577330000	21	0.302734	0.524169	-0.355134	-0.744303	1.95175	0.00295977	-0.785183	-5.61349	Q15437
Q15459	SF3A1	Splicing factor 3A subunit 1	30.5797	30.4626	30.4227	31.1435	31.2283	31.1574	31.3243	31.0028	31.161	-0.0137	0.89392				+	+	FB-P_Ctrl;P-BF_Ctrl	34	34	34	47.3	47.3	47.3	88.885	0	260.79	23634000000	618	3.66286	0	0.688091	12.7602	2.53429	0.000729302	0.674381	6.48062	Q15459
Q15477	SKIV2L	Helicase SKI2W	25.9051	25.8385	25.7865	25.4968	25.7983	Not detected	Not detected	25.0353	24.9504	-0.6547	0.0527371					+	P-BF_Ctrl	10	10	10	12	12	12	137.75	0	12.121	768360000	37	0.691633	0.0924095	-0.195811	-1.62127	3.2443	0	-0.850513	-15.6244	Q15477
Q15542	TAF5	Transcription initiation factor TFIID subunit 5	25.3201	25.2962	25.2921	26.4865	26.3352	26.6999	26.3155	25.5575	25.7761	-0.624167	0.0661893				+		FB-P_Ctrl	11	11	11	21.1	21.1	21.1	86.829	0	13.153	594850000	23	3.46344	0	1.20438	11.3464	1.20944	0.0130848	0.580226	2.57367	Q15542
Q15545	TAF7	Transcription initiation factor TFIID subunit 7	28.2075	28.1437	28.0768	28.8069	28.7491	28.739	28.8046	28.4006	28.3774	-0.237467	0.165791				+		FB-P_Ctrl	13	13	13	42.1	42.1	42.1	40.259	0	65.858	4382500000	137	3.86703	0	0.622346	14.3823	1.25673	0.0117347	0.384876	2.67756	Q15545
Q15555	MAPRE2	Microtubule-associated protein RP/EB family member 2	30.3764	30.2849	30.2069	29.5485	29.9348	30.073	29.2983	28.9246	29.1798	-0.717867	0.0200762					+	P-BF_Ctrl	17	16	15	62.4	60.6	57.5	37.031	0	97.554	17177000000	279	1.2485	0.0149696	-0.437288	-2.65936	3.17748	0	-1.15514	-9.57577	Q15555
Q15596	NCOA2	Nuclear receptor coactivator 2	26.4712	26.3949	26.3352	27.344	26.5168	26.9852	26.9088	26.8341	26.9071	-0.0653333	0.799534					+	P-BF_Ctrl	12	12	12	11.5	11.5	11.5	159.15	0	19.025	763050000	26	1.0616	0.0265072	0.54825	2.25901	3.3169	0	0.482928	10.4038	Q15596
Q15631	TSN	Translin	28.6857	28.6137	28.606	28.6267	28.6735	28.6712	28.4829	28.2138	28.3398	-0.311633	0.0170438					+	P-BF_Ctrl	9	9	9	43	43	43	26.183	0	175.08	5546300000	161	0.301868	0.526274	0.0219771	0.742471	1.62022	0.0046109	-0.289668	-3.54173	Q15631
Q15637	SF1	Splicing factor 1	30.5063	30.3399	30.2309	30.8846	31.0258	30.8276	31.4827	31.2481	31.4603	0.484367	0.00703439				+	+	FB-P_Ctrl;P-BF_Ctrl	16	16	16	26.8	26.8	26.8	68.329	0	323.31	21745000000	566	2.29326	0.00154571	0.553644	5.56998	3.15989	0	1.03803	9.47579	Q15637
Q15645	TRIP13	Pachytene checkpoint protein 2 homolog	28.0672	27.9845	27.9372	27.0805	26.9409	27.0031	26.7247	26.7762	26.855	-0.222867	0.0157994				+	+	FB-P_Ctrl;P-BF_Ctrl	11	11	11	28.2	28.2	28.2	48.55	0	47.284	3358600000	111	4.23486	0	-0.988099	-17.8233	4.64199	0	-1.211	-22.5746	Q15645
Q15648	MED1	Mediator of RNA polymerase II transcription subunit 1	29.7878	29.3843	29.3446	31.2101	30.91	31.0515	31.072	30.8069	30.9935	-0.0997333	0.442092				+	+	FB-P_Ctrl;P-BF_Ctrl	39	39	39	34.9	34.9	34.9	168.48	0	323.31	13558000000	383	3.13684	0.000167832	1.55163	9.34625	3.06708	0	1.45188	8.9641	Q15648
Q15652	JMJD1C	Probable JmjC domain-containing histone demethylation protein 2C	30.3796	30.3684	30.32	31.1872	31.1715	31.2707	32.56	32.2241	32.3929	1.18253	0.000313088				+	+	FB-P_Ctrl;P-BF_Ctrl	69	69	69	32.1	32.1	32.1	284.52	0	323.31	21169000000	622	4.73697	0	0.853809	23.8513	4.48741	0	2.03637	20.6395	Q15652
Q15654	TRIP6	Thyroid receptor-interacting protein 6	28.5767	28.5119	28.323	28.0709	28.1692	28.2856	27.5751	27.3981	27.4096	-0.7143	0.00106715					+	P-BF_Ctrl	8	8	8	34	34	34	50.287	0	111.72	4895000000	140	1.40181	0.0106971	-0.295329	-3.00758	3.34947	0	-1.00962	-10.6067	Q15654
Q15691	MAPRE1	Microtubule-associated protein RP/EB family member 1	31.1645	31.1257	31.1124	30.2634	30.1872	30.1366	29.5463	29.5175	29.5489	-0.658167	6.65885e-05				+	+	FB-P_Ctrl;P-BF_Ctrl	18	18	16	76.5	76.5	74.3	29.999	0	282.5	23399000000	353	4.708	0	-0.938463	-23.4545	6.95886	0	-1.59666	-85.9319	Q15691
Q15697	ZNF174	Zinc finger protein 174	25.12	25.1046	24.9805	24.3693	24.6218	24.1106	24.4167	Not detected	24.693	0.187617	0.45004				+	+	FB-P_Ctrl;P-BF_Ctrl	2	2	2	7.4	7.4	7.4	46.454	0	28.893	306330000	29	1.9827	0.00272293	-0.701126	-4.55142	1.65235	0.00439411	-0.513532	-4.36252	Q15697
Q15717	ELAVL1	ELAV-like protein 1	28.4789	28.4429	28.4248	28.0483	27.817	27.4492	28.0047	28.0572	28.032	0.2598	0.212024				+	+	FB-P_Ctrl;P-BF_Ctrl	9	9	9	36.5	36.5	36.5	36.091	0	78.822	4993400000	169	1.74394	0.00424443	-0.677354	-3.86744	4.3456	0	-0.417547	-19.0084	Q15717
Q15723	ELF2	ETS-related transcription factor Elf-2	27.8065	27.6144	27.4558	28.8776	28.4327	28.8054	28.4749	28.3655	28.962	-0.104433	0.672526				+	+	FB-P_Ctrl;P-BF_Ctrl	13	13	12	30	30	28	63.966	0	71.005	2937000000	85	2.49141	0.00131483	1.07963	6.31004	2.01661	0.00265103	0.975204	4.65508	Q15723;Q99607
Q15738	NSDHL	Sterol-4-alpha-carboxylate 3-dehydrogenase, decarboxylating	27.0417	26.9604	26.8691	26.0676	25.5954	25.9033	26.2495	26.0805	26.4873	0.417	0.083592				+	+	FB-P_Ctrl;P-BF_Ctrl	5	5	5	20.4	20.4	20.4	41.9	0	154.86	1673700000	72	2.76968	0.000770026	-1.10164	-7.4899	2.22874	0.00143492	-0.684581	-5.34495	Q15738
Q15750	TAB1	TGF-beta-activated kinase 1 and MAP3K7-binding protein 1	26.2628	26.2061	26.1462	26.2666	26.5208	25.9922	25.7706	25.6494	25.633	-0.575533	0.0222183					+	P-BF_Ctrl	9	9	9	24.4	24.4	24.4	54.643	0	44.906	1037000000	56	0.12876	0.881602	0.0548267	0.350808	3.16061	0	-0.520697	-9.47987	Q15750
Q15758	SLC1A5	Neutral amino acid transporter B(0)	29.8703	29.5836	29.5757	28.1034	28.1889	28.1169	28.3183	28.2832	28.1465	0.112933	0.1269				+	+	FB-P_Ctrl;P-BF_Ctrl	11	11	11	21.4	21.4	21.4	56.598	0	157.86	10734000000	241	3.97585	0	-1.54013	-15.3265	3.68838	0	-1.42717	-12.9529	Q15758
Q15813	TBCE	Tubulin-specific chaperone E	28.7673	28.7346	28.6934	28.6937	29.0991	28.952	27.8426	28.0765	28.1663	-0.886467	0.00439057					+	P-BF_Ctrl	16	16	15	40.6	40.6	39.3	59.345	0	195.11	5999800000	170	0.692795	0.0921781	0.183137	1.52116	2.68603	0.000514286	-0.703322	-7.11653	Q15813
Q15836	VAMP3	Vesicle-associated membrane protein 3	29.1407	29.004	28.942	26.1238	26.1257	26.4174	25.88	26.5756	26.2704	0.0197	0.934057				+	+	FB-P_Ctrl;P-BF_Ctrl	6	6	3	53	53	29	11.309	0	233.06	5071900000	146	4.79407	0	-2.8066	-24.6529	3.73242	0	-2.78692	-13.292	Q15836
Q15843	NEDD8	NEDD8	27.8059	27.7754	27.7136	27.2274	26.9419	26.7145	26.6744	27.2367	26.8623	-0.0368	0.87644				+	+	FB-P_Ctrl;P-BF_Ctrl	2	2	2	17.3	17.3	17.3	9.0714	0	57.078	2686200000	46	2.22392	0.00167358	-0.803701	-5.32846	2.13105	0.00191238	-0.840493	-5.0181	Q15843
Q15942	ZYX	Zyxin	30.1331	30.0036	29.8922	29.7367	29.9519	30.0376	28.6258	28.7599	28.8136	-1.17563	0.000369025					+	P-BF_Ctrl	13	13	13	33.6	33.6	33.6	61.277	0	286.16	14529000000	281	0.372843	0.374043	-0.100897	-0.889919	3.85784	0	-1.27656	-14.3052	Q15942
Q16181	SEPT7	Septin-7	30.5267	30.4352	30.3743	29.3732	29.8047	29.8613	29.5356	29.2146	29.3937	-0.298433	0.172576				+	+	FB-P_Ctrl;P-BF_Ctrl	19	19	19	41.4	41.4	41.4	50.679	0	276.46	21088000000	329	2.05504	0.00231736	-0.765678	-4.77468	3.3067	0	-1.06411	-10.341	Q16181;Q6ZU15
Q16186	ADRM1	Proteasomal ubiquitin receptor ADRM1	26.6972	26.62	26.3977	25.4786	25.6644	25.7528	Not detected	26.1449	25.9015	0.391267	0.0661694				+	+	FB-P_Ctrl;P-BF_Ctrl	3	3	3	9.6	9.6	9.6	42.153	0	77.477	1097800000	18	2.83224	0.000673854	-0.939722	-7.78045	1.4728	0.00685577	-0.548455	-3.72605	Q16186
Q16352	INA	Alpha-internexin	26.7144	26.4527	26.2425	Not detected	25.7252	25.8287	25.5816	Not detected	25.6175	-0.1774	0.0835595				+	+	FB-P_Ctrl;P-BF_Ctrl	9	8	8	18.8	17	17	55.39	0	24.544	1151600000	48	1.50706	0.00848155	-0.692897	-3.84173	1.79491	0.00386784	-0.870362	-4.92577	Q16352
Q16513	PKN2	Serine/threonine-protein kinase N2	28.1425	28.0231	27.9971	28.3101	28.1642	28.181	27.8941	27.4894	27.518	-0.5846	0.013402					+	P-BF_Ctrl	24	24	24	31.6	31.6	31.6	112.03	0	108.67	3966000000	216	1.2015	0.0173939	0.164239	2.55639	1.41963	0.0076097	-0.420403	-3.04937	Q16513
Q16531	DDB1	DNA damage-binding protein 1	26.6918	26.3441	26.2429	26.1148	25.7863	25.7888	26.1023	25.9617	25.9957	0.123267	0.351587					+	P-BF_Ctrl	8	8	8	11	11	11	126.97	0	29.869	1047000000	48	1.41505	0.0104055	-0.529608	-3.03861	1.33502	0.00947052	-0.406321	-2.85342	Q16531
Q16543	CDC37	Hsp90 co-chaperone Cdc37;Hsp90 co-chaperone Cdc37, N-terminally processed	28.7286	28.632	28.6261	28.7309	28.2749	28.5128	27.8081	27.8592	27.7572	-0.698033	0.00663673					+	P-BF_Ctrl	10	10	10	33.1	33.1	33.1	44.468	0	60.827	5327800000	120	0.502496	0.201756	-0.156094	-1.14947	4.36605	0	-0.854123	-19.2355	Q16543
Q16555	DPYSL2	Dihydropyrimidinase-related protein 2	31.8304	31.776	31.728	31.8749	31.4813	31.677	30.6255	30.2778	30.447	-1.22763	0.00126453					+	P-BF_Ctrl	27	27	22	60.1	60.1	49	62.293	0	323.31	51930000000	922	0.355777	0.406267	-0.100382	-0.854915	3.6533	0	-1.32807	-12.6888	Q16555
Q16576	RBBP7	Histone-binding protein RBBP7	30.2445	30.2012	30.0404	30.5974	30.7438	30.8205	30.4958	30.3887	30.4038	-0.291133	0.016667				+	+	FB-P_Ctrl;P-BF_Ctrl	15	15	9	45.6	45.6	35.5	47.82	0	323.31	18060000000	387	2.46143	0.00158081	0.558586	6.19308	1.71578	0.00408388	0.267447	3.79169	Q16576
Q16594	TAF9	Transcription initiation factor TFIID subunit 9	25.0459	24.9119	#NUM!	26.6303	26.6551	26.3027	Not detected	25.4309	26.1746	-0.726617	0.103328				+		FB-P_Ctrl	9	4	4	44.7	25.8	25.8	28.974	0	14.475	307010000	22	2.67321	0.000961538	1.55051	10.01	0.793148	0.051432	0.823866	2.1805	Q16594
Q16629	SRSF7	Serine/arginine-rich splicing factor 7	28.4398	28.3917	28.349	27.8346	27.3455	27.1713	27.7521	27.5494	27.4809	0.143667	0.539838				+	+	FB-P_Ctrl;P-BF_Ctrl	8	7	7	26.9	26.9	26.9	27.366	0	21.772	3246700000	62	2.03397	0.00236735	-0.943001	-4.70884	3.13664	0	-0.799365	-9.34514	Q16629
Q16630	CPSF6	Cleavage and polyadenylation specificity factor subunit 6	30.2512	30.1725	30.1132	30.8071	30.5097	30.6839	30.774	30.7687	30.7814	0.1078	0.279965				+	+	FB-P_Ctrl;P-BF_Ctrl	11	11	11	21.4	21.4	21.4	59.209	0	323.31	18556000000	434	2.16528	0.00216028	0.487892	5.13081	3.92058	0	0.595716	14.8397	Q16630
Q16643	DBN1	Drebrin	29.9222	29.8978	29.897	28.9671	28.7504	28.8387	28.0892	26.6246	27.3538	-1.4962	0.0248896				+	+	FB-P_Ctrl;P-BF_Ctrl	16	16	16	34.7	34.7	34.7	71.428	0	323.31	12199000000	306	4.11307	0	-1.0536	-16.6034	2.41881	0.000942207	-2.54979	-6.02993	Q16643
Q16763	UBE2S	Ubiquitin-conjugating enzyme E2 S	28.0503	26.8943	26.7599	26.0067	25.9497	25.8959	26.9183	26.7956	26.9115	0.924367	5.48017e-05				+		FB-P_Ctrl	5	5	5	36	36	36	23.845	0	23.81	1416300000	51	1.45185	0.00930561	-1.2841	-3.12572	0.36513	0.358959	-0.359704	-0.87413	Q16763
Q16795	NDUFA9	NADH dehydrogenase [ubiquinone] 1 alpha subcomplex subunit 9, mitochondrial	27.9291	27.8394	27.6221	26.2043	26.4354	26.5494	26.9429	27.2197	26.852	0.6085	0.0154279				+	+	FB-P_Ctrl;P-BF_Ctrl	12	12	12	38.5	38.5	38.5	42.509	0	43.556	2328600000	91	3.29426	0.000198347	-1.40053	-10.2649	2.2813	0.00138211	-0.792051	-5.52771	Q16795
Q1ED39	KNOP1	Lysine-rich nucleolar protein 1	27.1081	26.7984	26.7166	25.3343	25.5951	25.426	26.8491	26.3171	26.5108	1.1072	0.00307452				+		FB-P_Ctrl	7	7	7	17.7	17.7	17.7	51.588	0	55.74	1027100000	38	3.25795	0.000187867	-1.42254	-10.0459	0.73805	0.0620361	-0.315343	-1.60952	Q1ED39
Q1KMD3	HNRNPUL2	Heterogeneous nuclear ribonucleoprotein U-like protein 2	28.1711	28.1319	28.047	26.0095	26.3546	26.4032	27.2469	26.696	27.0478	0.741133	0.0218292				+	+	FB-P_Ctrl;P-BF_Ctrl	12	12	12	20.5	20.5	20.5	85.104	0	62.181	3194600000	87	3.86902	0	-1.86086	-14.399	2.60724	0.000664734	-1.11973	-6.77991	Q1KMD3
Q29RF7	PDS5A	Sister chromatid cohesion protein PDS5 homolog A	28.7941	28.6969	28.6887	28.2822	28.7072	28.5648	28.5899	28.6299	28.5788	0.0814667	0.552702					+	P-BF_Ctrl	30	30	27	27.4	27.4	26.4	150.83	0	250.53	5291200000	217	0.739007	0.0779069	-0.208531	-1.61139	1.56853	0.00516946	-0.127038	-3.41083	Q29RF7
Q2M2I8	AAK1	AP2-associated protein kinase 1	27.0782	27.0736	27.0319	27.5976	27.0841	27.0962	26.4647	26.1645	26.6148	-0.844633	0.0170766					+	P-BF_Ctrl	11	11	11	19.1	19.1	19.1	103.88	0	64.906	2013800000	87	0.51098	0.195519	0.198064	1.16618	2.08007	0.00209797	-0.646522	-4.85384	Q2M2I8
Q2NKX8	ERCC6L	DNA excision repair protein ERCC-6-like	27.6216	27.5963	27.5891	26.3191	25.9104	26.9785	Not detected	Not detected	26.2333	-0.169367	#DIV/0!				+		FB-P_Ctrl	16	16	16	18.6	18.6	18.6	141.1	0	65.338	2614500000	70	1.73886	0.00423226	-1.19969	-3.8537	0	1	-1.36903	0	Q2NKX8
Q2NL82	TSR1	Pre-rRNA-processing protein TSR1 homolog	30.7185	30.6104	30.553	28.9941	29.5932	29.4906	29.8639	29.9683	29.979	0.577767	0.0375286				+	+	FB-P_Ctrl;P-BF_Ctrl	19	19	19	29.6	29.6	29.6	91.809	0	323.31	18464000000	492	2.57116	0.00116874	-1.26798	-6.6304	3.46318	0	-0.690258	-11.3447	Q2NL82
Q2TAY7	SMU1	WD40 repeat-containing protein SMU1;WD40 repeat-containing protein SMU1, N-terminally processed	26.5438	26.3434	26.2706	Not detected	24.9674	Not detected	25.3185	25.2931	25.2598	0.323067	#DIV/0!					+	P-BF_Ctrl	7	7	7	21.1	21.1	21.1	57.543	0	24.694	937800000	41	0	0.859105	-1.41855	0	3.71108	0	-1.09549	-13.1266	Q2TAY7
Q2TBE0	CWF19L2	CWF19-like protein 2	27.2712	26.9721	26.4129	28.0111	27.1157	28.0318	28.487	27.7657	27.5715	0.221867	0.617799					+	P-BF_Ctrl	17	17	17	23.2	23.2	23.2	103.79	0	59.839	1259800000	62	0.995356	0.03294	0.834145	2.12234	1.31761	0.00978645	1.05603	2.81386	Q2TBE0
Q32MZ4	LRRFIP1	Leucine-rich repeat flightless-interacting protein 1	28.2623	28.2539	28.2467	26.0088	26.7057	26.9892	26.8234	26.6823	26.3635	0.0551667	0.872081				+	+	FB-P_Ctrl;P-BF_Ctrl	14	14	13	22.8	22.8	21.3	89.252	0	130.04	3513700000	101	2.35394	0.00147328	-1.68641	-5.78854	3.55652	0	-1.63126	-11.9866	Q32MZ4
Q32P41	TRMT5	tRNA (guanine(37)-N1)-methyltransferase	26.9506	26.9339	26.8957	27.7979	27.6134	27.7444	26.6751	26.879	26.8452	-0.9188	0.00038897				+		FB-P_Ctrl	15	15	15	32	32	32	58.246	0	119.62	1695100000	62	3.80287	0	0.791781	13.8522	0.909864	0.0336827	-0.127013	-1.94923	Q32P41
Q3KQU3	MAP7D1	MAP7 domain-containing protein 1	26.3683	25.9956	25.8659	Not detected	Not detected	25.475	25.091	25.5694	25.577	-0.0625333	#DIV/0!					+	P-BF_Ctrl	10	10	10	18.9	18.9	18.9	92.819	0	27.836	786550000	41	0	0.857143	-0.601543	0	1.40508	0.00793172	-0.664113	-3.01521	Q3KQU3
Q3MHD2	LSM12	Protein LSM12 homolog	27.7343	27.7139	27.6804	Not detected	27.0908	Not detected	26.8614	26.6736	26.8304	-0.302333	#DIV/0!					+	P-BF_Ctrl	3	3	3	26.2	26.2	26.2	21.701	0	8.4216	2687600000	83	0	0.85576	-0.618685	0	3.97259	0	-0.92108	-15.2974	Q3MHD2
Q3T8J9	GON4L	GON-4-like protein	25.6082	25.4889	#NUM!	25.9972	25.7535	25.362	25.0266	Not detected	25.1553	-0.613283	0.0863754					+	P-BF_Ctrl	3	3	2	1.6	1.6	1.1	248.62	0.0039862	2.4903	541640000	8	0.246242	0.657081	0.155688	0.640824	1.45797	0.0068954	-0.457572	-5.21679	Q3T8J9
Q3YEC7	RABL6	Rab-like protein 6	28.3198	28.2907	28.1531	27.0491	27.3211	27.3797	26.8693	25.9703	26.8617	-0.682867	0.0962725				+	+	FB-P_Ctrl;P-BF_Ctrl	18	18	18	35.1	35.1	35.1	79.548	0	169.12	3749500000	180	3.03688	0.000476948	-1.00452	-8.80322	2.29397	0.00139573	-1.68741	-5.57248	Q3YEC7
Q3ZCQ8	TIMM50	Mitochondrial import inner membrane translocase subunit TIM50	29.8072	29.64	29.5383	28.0402	28.3963	28.3492	28.4875	28.7986	28.7333	0.411233	0.0483995				+	+	FB-P_Ctrl;P-BF_Ctrl	8	8	8	32	32	32	39.646	0	323.31	9537300000	309	3.29327	0.000197531	-1.39991	-10.2589	2.88662	0.000110218	-0.988679	-8.04114	Q3ZCQ8
Q49A26	GLYR1	Putative oxidoreductase GLYR1	28.9555	28.8779	28.8643	27.5489	27.5948	27.5991	28.1541	27.9329	27.9041	0.4161	0.00668325				+	+	FB-P_Ctrl;P-BF_Ctrl	11	11	11	25.5	25.5	25.5	60.547	0	121.92	5380600000	155	5.64943	0	-1.31832	-40.4065	3.37216	0	-0.902188	-10.7502	Q49A26
Q4G0J3	LARP7	La-related protein 7	28.0779	27.9592	27.9331	28.528	28.4224	28.3567	28.6929	28.4344	28.3571	0.0591	0.628983				+	+	FB-P_Ctrl;P-BF_Ctrl	14	14	14	28.4	28.4	28.4	66.898	0	153.88	3311200000	106	2.57902	0.00117406	0.445643	6.66274	1.98288	0.00277616	0.504681	4.55196	Q4G0J3
Q4KMP7	TBC1D10B	TBC1 domain family member 10B	26.8853	26.8238	26.6927	25.0624	Not detected	25.8109	24.9773	24.9897	24.8217	-0.507083	0.176016				+	+	FB-P_Ctrl;P-BF_Ctrl	4	4	4	10.6	10.6	10.6	87.198	0	30.898	910060000	28	1.74665	0.00424748	-1.36394	-4.72887	4.73822	0	-1.87106	-23.8686	Q4KMP7
Q4L235	AASDH	Acyl-CoA synthetase family member 4	24.8899	24.8688	24.6708	26.4786	27.2724	27.2792	27.3227	27.7887	27.8239	0.635033	0.110684				+	+	FB-P_Ctrl;P-BF_Ctrl	12	12	12	13.7	13.7	13.7	122.6	0	34.859	619750000	34	2.87973	0.000552113	2.20022	8.00766	4.06164	0	2.83526	16.1132	Q4L235
Q53EL6	PDCD4	Programmed cell death protein 4	28.7083	28.577	28.4893	28.9769	29.1782	29.1375	28.4869	28.8515	28.7361	-0.406033	0.0305839				+		FB-P_Ctrl	10	10	10	28.6	28.6	28.6	51.735	0	312.64	4612000000	130	2.33493	0.0014591	0.506001	5.71931	0.32906	0.444059	0.0999571	0.799573	Q53EL6
Q53EZ4	CEP55	Centrosomal protein of 55 kDa	26.1719	26.1328	25.9753	25.354	25.7412	25.2504	25.4514	25.4132	25.5159	0.0116333	0.942794				+	+	FB-P_Ctrl;P-BF_Ctrl	8	8	8	19.6	19.6	19.6	54.178	0	28.68	701960000	42	1.7941	0.00364301	-0.644771	-4.00481	3.15157	0	-0.633146	-9.42885	Q53EZ4
Q53GG5	PDLIM3	PDZ and LIM domain protein 3	28.4944	28.3839	28.3307	28.4882	28.5997	28.8062	28.1167	28.2578	28.2083	-0.4371	0.0127563					+	P-BF_Ctrl	5	5	5	21.7	21.7	21.7	39.232	0	210.95	4053400000	126	1.02205	0.0297926	0.228392	2.17712	1.51828	0.00577262	-0.208703	-3.28635	Q53GG5
Q53GQ0	HSD17B12	Very-long-chain 3-oxoacyl-CoA reductase	28.3973	27.8348	27.8323	26.6729	26.8664	26.5131	26.8566	26.6645	26.6858	0.0515	0.687168				+	+	FB-P_Ctrl;P-BF_Ctrl	7	7	7	25	25	25	34.324	0	16.69	3197900000	85	2.47664	0.00159411	-1.33732	-6.2522	2.54155	0.00064239	-1.28584	-6.50989	Q53GQ0
Q53GS9	USP39	U4/U6.U5 tri-snRNP-associated protein 2	30.6771	30.0904	30.0893	28.7684	29.2787	28.9535	29.7846	29.973	29.8475	0.868167	0.0054819				+		FB-P_Ctrl	18	18	18	35.8	35.8	35.8	65.38	0	286.93	11675000000	374	2.19298	0.00184206	-1.28539	-5.22343	0.960436	0.0284402	-0.417252	-2.05123	Q53GS9
Q53H12	AGK	Acylglycerol kinase, mitochondrial	27.1031	27.082	27.0431	25.5441	25.9021	25.4774	25.4937	25.2404	25.7455	-0.148	0.493435				+	+	FB-P_Ctrl;P-BF_Ctrl	6	6	6	24.9	24.9	24.9	47.137	0	46.11	1674400000	58	3.37792	0.000222738	-1.43489	-10.7869	3.37633	0	-1.58287	-10.7768	Q53H12
Q53HL2	CDCA8	Borealin	27.0032	26.9638	26.8721	25.9425	Not detected	25.6039	26.9159	25.9588	26.504	0.686367	0.168176				+		FB-P_Ctrl	9	9	9	36.1	36.1	36.1	31.323	0	20.25	1281400000	43	2.48656	0.00150424	-1.17314	-8.63952	0.804137	0.0498493	-0.486782	-1.73919	Q53HL2
Q53SF7	COBLL1	Cordon-bleu protein-like 1	25.5851	25.5806	25.5223	Not detected	25.0713	Not detected	24.317	24.4598	24.4635	-0.657867	#DIV/0!					+	P-BF_Ctrl	6	6	6	9.8	9.8	9.8	123.87	0	10.183	604600000	23	0	0.856593	-0.491327	0	4.59532	0	-1.14921	-21.9723	Q53SF7
Q53T59	HS1BP3	HCLS1-binding protein 3	26.1776	26.1082	26.0418	25.5142	25.5133	25.869	24.6587	24.3162	24.1834	-1.24607	0.0025103				+	+	FB-P_Ctrl;P-BF_Ctrl	5	5	5	16.8	16.8	16.8	42.78	0	131.75	900610000	48	1.72804	0.00459386	-0.477079	-3.82457	3.51984	0	-1.7231	-11.7303	Q53T59
Q58FF8	HSP90AB2P	Putative heat shock protein HSP 90-beta 2	26.9957	26.7312	26.5988	Not detected	Not detected	Not detected	25.9393	26.3503	26.0721	#DIV/0!	#DIV/0!					+	P-BF_Ctrl	11	1	1	20.5	3.9	3.9	44.348	0.00029078	3.6422	1146900000	48	0	0.856866	Not detected	0	1.75325	0.00413537	-0.654634	-3.8927	Q58FF8
Q5BKZ1	ZNF326	DBIRD complex subunit ZNF326	27.6782	27.6688	27.616	26.6534	26.4706	26.4136	27.0196	26.9789	27.1029	0.521267	0.00300105				+	+	FB-P_Ctrl;P-BF_Ctrl	8	8	8	17.9	17.9	17.9	65.653	0	37.407	2434100000	129	3.96794	0	-1.1418	-15.2559	3.94177	0	-0.620556	-15.0245	Q5BKZ1
Q5H9R7	PPP6R3	Serine/threonine-protein phosphatase 6 regulatory subunit 3	28.4091	28.2511	28.2496	28.1255	27.6058	27.8419	27.206	26.8448	26.9838	-0.8462	0.00992547					+	P-BF_Ctrl	16	16	16	22.6	22.6	22.6	97.668	0	100.64	4437700000	145	1.31011	0.0123849	-0.445503	-2.79692	3.40636	0	-1.2917	-10.97	Q5H9R7
Q5HYK7	SH3D19	SH3 domain-containing protein 19	27.0917	26.9642	26.8629	26.6921	26.4109	26.8867	26.3919	25.571	26.0274	-0.666467	0.0722859					+	P-BF_Ctrl	11	11	11	19.2	19.2	19.2	86.524	0	20.101	1664400000	44	0.946223	0.0375398	-0.309722	-2.02245	1.77768	0.00396785	-0.976175	-3.95948	Q5HYK7
Q5JSH3	WDR44	WD repeat-containing protein 44	29.3313	29.297	29.2913	29.1979	28.7218	28.7624	28.7558	28.5369	28.6403	-0.2497	0.204704					+	P-BF_Ctrl	33	33	33	39.3	39.3	39.3	101.37	0	179.84	8922100000	268	1.26599	0.0143614	-0.41248	-2.69809	3.29653	0	-0.662182	-10.2788	Q5JSH3
Q5JSZ5	PRRC2B	Protein PRRC2B	25.4939	25.483	25.3502	25.0201	24.7089	25.3623	25.6121	25.6154	25.6081	0.581433	0.0368881					+	P-BF_Ctrl	12	11	11	8.3	7.8	7.8	242.96	0	22.745	501210000	27	0.994413	0.0329221	-0.411901	-2.12042	1.66853	0.00435848	0.169488	3.66676	Q5JSZ5
Q5JTH9	RRP12	RRP12-like protein	30.7012	30.5457	30.4835	28.8653	29.1924	29.1904	29.8102	29.9413	29.761	0.7548	0.00339496				+	+	FB-P_Ctrl;P-BF_Ctrl	28	28	28	27.4	27.4	27.4	143.7	0	277.69	16754000000	420	3.53102	0	-1.49406	-11.8079	3.03311	0	-0.739297	-8.7833	Q5JTH9
Q5JTV8	TOR1AIP1	Torsin-1A-interacting protein 1	28.1545	28.1056	28.0357	25.7355	26.8452	26.3324	27.2295	26.7374	26.7834	0.6124	0.161408				+	+	FB-P_Ctrl;P-BF_Ctrl	9	9	9	20.4	20.4	20.4	66.248	0	64.467	3335900000	87	2.29148	0.00154426	-1.79424	-5.56365	2.74005	0.000299894	-1.18183	-7.3557	Q5JTV8
Q5QJ74	TBCEL	Tubulin-specific chaperone cofactor E-like protein	27.9954	27.8558	27.2784	27.3256	27.9066	27.4738	26.006	27.0015	26.6855	-1.00433	0.0423562					+	P-BF_Ctrl	10	10	10	37.7	37.7	37.7	48.194	0	166.15	2309600000	81	0.193252	0.773605	-0.141212	-0.503872	1.45131	0.00705602	-1.14555	-3.12443	Q5QJ74
Q5QJE6	DNTTIP2	Deoxynucleotidyltransferase terminal-interacting protein 2	28.6229	28.5741	28.5719	27.3007	27.7231	27.5431	28.3888	28.1329	28.3128	0.755867	0.00629986				+	+	FB-P_Ctrl;P-BF_Ctrl	17	17	17	32.1	32.1	32.1	84.468	0	131.5	4355700000	162	3.00593	0.000465116	-1.06733	-8.64108	1.79571	0.00387045	-0.311483	-4.00926	Q5QJE6
Q5R372	RABGAP1L	Rab GTPase-activating protein 1-like	25.0161	24.9763	24.9537	Not detected	24.7802	24.7952	Not detected	Not detected	24.3654	-0.4223	#DIV/0!				+		FB-P_Ctrl	6	6	6	8.3	8.3	8.3	92.512	0	9.6369	478660000	16	2.39355	0.00151147	-0.1943	-8.02453	0	1	-0.616617	0	Q5R372
Q5SRE5	NUP188	Nucleoporin NUP188 homolog	27.0983	27.0123	26.8368	25.8707	Not detected	25.3598	25.4698	Not detected	25.6036	-0.07855	0.794165				+	+	FB-P_Ctrl;P-BF_Ctrl	12	12	12	8.9	8.9	8.9	196.04	0	25.725	1356800000	66	2.10552	0.00236824	-1.36719	-6.36651	3.00822	0	-1.44578	-13.0069	Q5SRE5
Q5SSJ5	HP1BP3	Heterochromatin protein 1-binding protein 3	30.6251	30.5395	30.5223	29.833	30.0093	29.9642	30.4021	30.3285	30.4737	0.465933	0.00230707				+	+	FB-P_Ctrl;P-BF_Ctrl	19	19	19	35.6	35.6	35.6	61.206	0	156.47	19051000000	334	3.27679	0.000192385	-0.626856	-10.1589	1.42323	0.00749082	-0.160894	-3.05787	Q5SSJ5
Q5SW79	CEP170	Centrosomal protein of 170 kDa	31.3643	31.2893	31.2228	30.8896	30.8308	30.8208	30.3002	30.0079	30.2324	-0.6669	0.00183731				+	+	FB-P_Ctrl;P-BF_Ctrl	55	55	54	46	46	45.4	175.29	0	323.31	33632000000	707	3.18888	0.000176796	-0.445065	-9.64112	3.47506	0	-1.11198	-11.4245	Q5SW79;Q96L14
Q5SY16	NOL9	Polynucleotide 5-hydroxyl-kinase NOL9	25.848	25.7424	25.4942	24.9041	Not detected	24.7239	24.912	Not detected	Not detected	0.098	#DIV/0!				+		FB-P_Ctrl	5	5	5	8.5	8.5	8.5	79.322	0	8.2867	614180000	20	1.99754	0.00266133	-0.88085	-5.8291	0	1	-0.782881	0	Q5SY16
Q5T0B9	ZNF362	Zinc finger protein 362	27.3003	27.2109	27.2101	27.9563	27.5906	27.3801	28.3558	28.6339	28.1596	0.740767	0.0270982					+	P-BF_Ctrl	9	9	8	28.6	28.6	26.2	45.814	0	51.509	1849800000	83	1.10545	0.0235278	0.401931	2.35086	2.90137	0.000111111	1.14268	8.1132	Q5T0B9
Q5T1V6	DDX59	Probable ATP-dependent RNA helicase DDX59	25.0879	24.6647	#NUM!	25.5483	25.5998	25.7809	25.6997	25.4277	25.6097	-0.0639667	0.580995				+	+	FB-P_Ctrl;P-BF_Ctrl	10	10	10	21.8	21.8	21.8	68.809	0	29.614	274330000	18	1.61115	0.00591469	0.766703	4.20968	1.47316	0.00685989	0.702701	3.72722	Q5T1V6
Q5T5U3	ARHGAP21	Rho GTPase-activating protein 21	26.9883	26.843	26.835	26.9779	26.7981	27.1162	26.3924	25.7104	26.3545	-0.811633	0.0276249					+	P-BF_Ctrl	14	14	14	10.2	10.2	10.2	217.46	0	75.003	1723000000	128	0.291078	0.552067	0.0753428	0.719569	1.50187	0.00625167	-0.736333	-3.24627	Q5T5U3
Q5T5Y3	CAMSAP1	Calmodulin-regulated spectrin-associated protein 1	28.3497	28.2866	28.2598	28.7633	28.5339	28.5347	27.9994	27.6062	27.9792	-0.749033	0.00732938				+	+	FB-P_Ctrl;P-BF_Ctrl	27	27	27	26.8	26.8	26.8	177.97	0	71.726	4988600000	186	1.74023	0.00423529	0.3119	3.85741	1.54299	0.005508	-0.437107	-3.34722	Q5T5Y3
Q5T6F2	UBAP2	Ubiquitin-associated protein 2	29.2747	29.2441	29.192	29.1339	28.6599	28.7861	28.6331	28.5228	28.6014	-0.2742	0.132528					+	P-BF_Ctrl	15	15	15	23.5	23.5	23.5	117.11	0	220.4	9004000000	272	1.23165	0.0158743	-0.376963	-2.62224	4.04825	0	-0.651143	-15.9878	Q5T6F2
Q5T8P6	RBM26	RNA-binding protein 26	30.8353	30.8277	30.6135	31.0488	31.2047	31.299	31.1352	31.0584	30.9259	-0.144333	0.203994				+	+	FB-P_Ctrl;P-BF_Ctrl	31	31	29	27.1	27.1	25.8	113.6	0	323.31	22785000000	430	1.83848	0.00310613	0.425301	4.12906	1.38033	0.00816803	0.280972	2.95757	Q5T8P6
Q5TAX3	ZCCHC11	Terminal uridylyltransferase 4	28.0567	27.4887	27.1414	26.1975	Not detected	Not detected	25.6717	25.7935	Not detected	-0.4649	#DIV/0!					+	P-BF_Ctrl	9	9	9	7.5	7.5	7.5	185.16	0	20.821	1995500000	39	0	0.852816	-1.36474	0	1.87487	0.00335978	-1.82966	-5.26691	Q5TAX3
Q5TEC6	HIST2H3PS2	Histone H3	31.1615	30.882	30.8115	29.6961	29.3242	29.3614	29.9303	30.003	29.945	0.498867	0.0143046				+	+	FB-P_Ctrl;P-BF_Ctrl	5	2	2	25	8.1	8.1	15.43	0	19.354	20082000000	96	3.1383	0.000168126	-1.49105	-9.35442	3.0903	0	-0.992182	-9.08969	Q5TEC6
Q5TFE4	NT5DC1	5-nucleotidase domain-containing protein 1	27.8601	27.8184	27.7054	27.3288	27.7764	27.8601	27.2779	27.1696	27.1675	-0.4501	0.0561132					+	P-BF_Ctrl	7	7	7	23.7	23.7	23.7	51.844	0	39.276	2311100000	75	0.336422	0.445171	-0.139571	-0.814893	3.25336	0	-0.589643	-10.0184	Q5TFE4
Q5TH69	ARFGEF3	Brefeldin A-inhibited guanine nucleotide-exchange protein 3	25.3157	25.1707	25.1578	24.6676	24.6523	24.9279	25.3118	Not detected	Not detected	0.562533	#DIV/0!				+		FB-P_Ctrl	10	10	10	7.1	7.1	7.1	240.65	0	29.216	488750000	27	1.97547	0.00271644	-0.465474	-4.52954	0	1	0.0970815	0	Q5TH69
Q5TKA1	LIN9	Protein lin-9 homolog	24.75	24.3021	23.9939	Not detected	Not detected	Not detected	26.3918	25.4742	25.5302	#DIV/0!	#DIV/0!					+	P-BF_Ctrl	3	3	3	9.4	9.4	9.4	61.945	0	9.4896	279530000	12	0	0.863731	Not detected	0	1.76579	0.0041519	1.45011	3.92688	Q5TKA1
Q5UIP0	RIF1	Telomere-associated protein RIF1	29.6791	29.623	29.583	29.9643	29.8162	30.0054	30.4809	30.2477	30.2229	0.388533	0.0179204				+	+	FB-P_Ctrl;P-BF_Ctrl	49	49	49	27.5	27.5	27.5	274.46	0	323.31	11547000000	411	2.03155	0.00236542	0.300281	4.70133	2.8654	0.000108597	0.688798	7.93847	Q5UIP0
Q5VSY0	GKAP1	G kinase-anchoring protein 1	26.5544	26.5213	26.4843	24.8934	25.4744	25.4828	25.1269	25.459	25.4438	0.0597	0.802249				+	+	FB-P_Ctrl;P-BF_Ctrl	7	7	7	24.9	24.9	24.9	42.078	0	54.125	1258000000	23	2.49	0.00131064	-1.23648	-6.3045	3.36179	0	-1.17673	-10.6844	Q5VSY0
Q5VT52	RPRD2	Regulation of nuclear pre-mRNA domain-containing protein 2	28.5721	28.537	28.4842	29.5468	29.2399	29.225	29.6554	29.4502	29.5541	0.216	0.147376				+	+	FB-P_Ctrl;P-BF_Ctrl	31	31	31	36.5	36.5	36.5	156.02	0	123.67	6047600000	292	2.7651	0.000767053	0.806129	7.46901	4.03262	0	1.02213	15.8428	Q5VT52
Q5VTL8	PRPF38B	Pre-mRNA-splicing factor 38B	27.1094	26.9446	26.5835	25.6238	25.7766	26.0296	26.5906	26.6433	26.8445	0.8828	0.00335228				+		FB-P_Ctrl	6	6	6	10.6	10.6	10.6	64.467	0	11.14	1271100000	27	2.26653	0.00151431	-1.06915	-5.47585	0.464363	0.210336	-0.186339	-1.07406	Q5VTL8
Q5VTR2	RNF20	E3 ubiquitin-protein ligase BRE1A	27.9182	27.3486	27.3254	28.0283	27.9184	27.9832	28.4396	28.208	28.2664	0.328033	0.0127699					+	P-BF_Ctrl	24	21	21	31.9	28.8	28.8	113.66	0	90.611	2410200000	109	1.06676	0.0258803	0.445904	2.26975	1.70315	0.00419296	0.773929	3.75805	Q5VTR2
Q5VUA4	ZNF318	Zinc finger protein 318	28.9707	28.9121	28.9009	29.9607	29.5688	29.7651	30.2218	29.9985	30.0486	0.324767	0.0694058				+	+	FB-P_Ctrl;P-BF_Ctrl	39	39	39	22.6	22.6	22.6	251.11	0	149.85	7764000000	274	2.72009	0.000742217	0.836982	7.26652	4.08707	0	1.16173	16.3538	Q5VUA4
Q5VUJ6	LRCH2	Leucine-rich repeat and calponin homology domain-containing protein 2	27.9489	27.6256	27.5863	27.2987	27.6241	27.0512	27.1923	27.2211	Not detected	-0.117967	0.620539					+	P-BF_Ctrl	6	6	6	9	9	9	84.587	0	12.604	2769600000	59	0.915634	0.0416859	-0.395615	-1.96081	1.38922	0.0080117	-0.513542	-3.45423	Q5VUJ6
Q5VWN6	FAM208B	Protein FAM208B	25.4804	25.4389	25.3844	26.8009	26.2944	26.3072	26.8238	26.5459	26.8159	0.261033	0.241699				+	+	FB-P_Ctrl;P-BF_Ctrl	11	11	11	5.1	5.1	5.1	268.84	0	16.343	608770000	31	2.43988	0.00155967	1.03297	6.11014	3.7653	0	1.294	13.5507	Q5VWN6
Q5VWZ2	LYPLAL1	Lysophospholipase-like protein 1	28.9604	28.9335	28.8205	28.0997	28.7729	28.543	26.9171	27.242	27.3928	-1.2879	0.00602857					+	P-BF_Ctrl	8	8	8	41.4	41.4	41.4	26.316	0	61.157	5928900000	160	1.00485	0.0316236	-0.432945	-2.14178	3.51909	0	-1.72085	-11.7251	Q5VWZ2
Q5VYK3	ECM29	Proteasome-associated protein ECM29 homolog	25.4213	25.4117	25.1221	Not detected	Not detected	Not detected	23.8422	24.0093	24.0641	#DIV/0!	#DIV/0!					+	P-BF_Ctrl	6	6	6	3.7	3.7	3.7	204.29	0	5.562	464630000	21	0	0.8654	Not detected	0	3.46282	0	-1.34648	-11.3422	Q5VYK3
Q5VZ89	DENND4C	DENN domain-containing protein 4C	27.5648	27.5041	27.484	27.1689	26.6849	26.1239	25.9086	25.9202	25.7429	-0.802	0.0594417					+	P-BF_Ctrl	20	20	20	15.8	15.8	15.8	212.71	0	80.627	2260900000	82	1.32637	0.0121035	-0.858404	-2.83372	4.93194	0	-1.66038	-26.7	Q5VZ89
Q5VZE5	NAA35	N-alpha-acetyltransferase 35, NatC auxiliary subunit	27.0691	26.7595	26.7512	25.7752	25.7103	25.4461	25.3693	25.2493	Not detected	-0.334567	0.0929302				+	+	FB-P_Ctrl;P-BF_Ctrl	9	9	9	14.1	14.1	14.1	83.638	0	17.093	1139900000	47	2.95462	0.000445765	-1.21606	-8.37825	2.78199	0.00020457	-1.55064	-10.9015	Q5VZE5
Q641Q2	FAM21A	WASH complex subunit FAM21A;WASH complex subunit FAM21C	28.2628	28.2539	28.0768	28.0308	27.5279	27.5178	26.911	26.4277	26.8225	-0.971767	0.012509					+	P-BF_Ctrl	24	24	24	32.2	32.2	32.2	147.18	0	257.44	4197400000	203	1.31679	0.0122301	-0.505674	-2.81201	3.11198	0	-1.47744	-9.20839	Q641Q2;Q9Y4E1
Q658Y4	FAM91A1	Protein FAM91A1	27.6052	27.572	27.3407	26.405	26.5123	26.7102	25.6222	26.5941	26.4081	-0.334367	0.342802				+	+	FB-P_Ctrl;P-BF_Ctrl	12	12	12	18.4	18.4	18.4	93.908	0	54.103	2208300000	84	2.85548	0.000536986	-0.963491	-7.89092	1.86226	0.00347645	-1.29786	-4.1967	Q658Y4;P0C866
Q659A1	ICE2	Little elongation complex subunit 2	24.0537	24.0216	23.8014	25.0923	25.0251	24.2829	24.171	24.2636	24.0526	-0.6377	0.0748743				+		FB-P_Ctrl	5	5	5	6.5	6.5	6.5	110.01	0	5.442	250130000	22	1.44189	0.00946048	0.841204	3.10201	0.951484	0.0291108	0.203451	2.03309	Q659A1
Q659C4	LARP1B	La-related protein 1B	26.3072	26.2557	26.2235	Not detected	24.561	25.2237	Not detected	Not detected	Not detected	#DIV/0!	#DIV/0!				+		FB-P_Ctrl	10	8	8	14.7	12	12	105.32	0	58.254	803930000	34	1.92739	0.00279846	-1.36973	-5.50166	0	1	Not detected	0	Q659C4
Q66K74	MAP1S	Microtubule-associated protein 1S;MAP1S heavy chain;MAP1S light chain	26.598	26.2196	26.1112	25.0322	25.0139	25.0456	25.573	25.15	24.998	0.209767	0.290267				+	+	FB-P_Ctrl;P-BF_Ctrl	7	7	7	12.1	12.1	12.1	112.21	0	41.854	901040000	42	3.00761	0.000465839	-1.27903	-8.6498	2.03682	0.00253225	-1.06926	-4.71772	Q66K74
Q68CP9	ARID2	AT-rich interactive domain-containing protein 2	26.3702	26.3308	26.2975	25.8207	25.9809	25.6868	26.7704	26.5697	26.6306	0.827433	0.00133785				+	+	FB-P_Ctrl;P-BF_Ctrl	9	9	9	10	10	10	197.39	0	17.318	1147300000	22	2.34231	0.00146473	-0.503333	-5.74611	2.1694	0.00183398	0.324123	5.14451	Q68CP9
Q68CZ6	HAUS3	HAUS augmin-like complex subunit 3	27.0567	26.9936	26.9493	27.2221	27.043	26.8129	26.2732	26.1982	25.8347	-0.923967	0.00680918					+	P-BF_Ctrl	14	14	14	31.5	31.5	31.5	69.65	0	28.626	1590700000	50	0.0750262	0.962595	0.0261567	0.213545	2.52925	0.000726599	-0.89782	-6.46035	Q68CZ6
Q68DK7	MSL1	Male-specific lethal 1 homolog	25.1958	24.9808	24.9775	25.7251	25.074	25.1442	24.0508	24.6836	24.4978	-0.9037	0.0316996					+	P-BF_Ctrl	4	4	4	10.3	10.3	10.3	67.128	0	8.7273	315560000	16	0.529923	0.179076	0.263063	1.2034	1.47618	0.00656145	-0.640652	-3.18404	Q68DK7
Q68DQ2	CRYBG3	Very large A-kinase anchor protein	25.5073	25.4923	25.3545	24.431	Not detected	24.7953	Not detected	Not detected	Not detected	#DIV/0!	#DIV/0!				+		FB-P_Ctrl	11	11	11	6	6	6	330.63	0	16.674	443010000	28	1.94965	0.00275841	-0.838249	-5.6038	0	1	Not detected	0	Q68DQ2
Q68E01	INTS3	Integrator complex subunit 3	25.6103	25.4444	25.326	Not detected	25.0318	24.9814	Not detected	Not detected	Not detected	#DIV/0!	#DIV/0!				+		FB-P_Ctrl	5	5	5	7.2	7.2	7.2	118.07	0	41.54	394250000	17	1.60788	0.00597164	-0.453652	-4.19775	0	1	Not detected	0	Q68E01
Q68EM7	ARHGAP17	Rho GTPase-activating protein 17	26.3987	26.2896	26.2444	25.9978	25.4727	26.0797	25.1679	24.7139	Not detected	-0.909167	0.0554568					+	P-BF_Ctrl	7	7	7	12.7	12.7	12.7	95.436	0	23.297	1001500000	56	1.10806	0.023268	-0.460838	-2.35637	2.33267	0.000997506	-1.36999	-7.64428	Q68EM7
Q69YN4	KIAA1429	Protein virilizer homolog	26.6054	26.6024	26.4559	25.4364	26.4245	26.0795	25.6155	26.023	25.9119	-0.13	0.700139					+	P-BF_Ctrl	10	10	10	7.3	7.3	7.3	202.02	0	46.246	940440000	42	0.913225	0.0416989	-0.574446	-1.95598	2.23519	0.00143606	-0.704468	-5.36713	Q69YN4
Q6DKI1	RPL7L1	60S ribosomal protein L7-like 1	26.3474	26.1472	26.053	24.835	25.3804	25.1057	25.6152	25.5012	25.49	0.428433	0.0577378				+	+	FB-P_Ctrl;P-BF_Ctrl	4	4	4	19.6	19.6	19.6	29.669	0	10.191	906820000	34	2.4063	0.00152669	-1.07551	-5.98273	2.60514	0.000663452	-0.647095	-6.77112	Q6DKI1
Q6EEV4	POLR2M	DNA-directed RNA polymerase II subunit GRINL1A, isoforms 4/5	27.3	27.1981	27.0036	25.8643	26.553	26.5206	26.5576	25.8699	25.4351	-0.358433	0.416989				+	+	FB-P_Ctrl;P-BF_Ctrl	2	2	2	25	25	25	15.131	0	50.226	1565700000	51	1.62413	0.00575204	-0.854572	-3.55176	1.63789	0.00444048	-1.21298	-3.58715	Q6EEV4
Q6FI81	CIAPIN1	Anamorsin	32.186	32.1059	32.0731	31.1433	31.6819	31.8643	30.9207	31.1621	31.2366	-0.4567	0.125665					+	P-BF_Ctrl	13	13	13	48.1	48.1	48.1	33.582	0	323.31	53373000000	534	1.19867	0.01756	-0.558494	-2.55025	3.25814	0	-1.01519	-10.0469	Q6FI81
Q6I9Y2	THOC7	THO complex subunit 7 homolog	25.996	25.9304	25.8432	Not detected	26.2083	26.1906	26.4326	25.1699	26.2659	-0.243317	0.666693				+		FB-P_Ctrl	5	5	5	25.5	25.5	25.5	23.743	0	10.438	796360000	26	1.76462	0.00414203	0.276265	4.80143	0.0277409	1	0.0329272	0.0826218	Q6I9Y2
Q6IBS0	TWF2	Twinfilin-2	27.4576	27.4575	27.4012	27.5472	27.3527	27.305	26.9027	26.6816	26.9176	-0.567667	0.00593352					+	P-BF_Ctrl	7	6	6	31.5	29.5	29.5	39.548	0	130.01	2455800000	111	0.185211	0.787497	-0.037089	-0.48535	2.81461	0.000106077	-0.604774	-7.69757	Q6IBS0
Q6IN85	SMEK1	Serine/threonine-protein phosphatase 4 regulatory subunit 3A	30.1121	29.9598	29.8652	31.5416	31.3026	31.3492	30.6637	30.5847	30.6084	-0.778867	0.000532263				+	+	FB-P_Ctrl;P-BF_Ctrl	34	34	28	44.1	44.1	38.5	95.367	0	323.31	14295000000	352	3.80017	0	1.41878	13.8303	2.97066	0.000115523	0.639935	8.4596	Q6IN85
Q6IQ49	SDE2	Protein SDE2 homolog	27.0987	26.857	26.8102	28.1702	28.4277	28.3762	28.2743	28.6344	28.5186	0.151067	0.316623				+	+	FB-P_Ctrl;P-BF_Ctrl	7	7	7	18.8	18.8	18.8	49.741	0	85.704	1811300000	60	3.527	0	1.40276	11.7799	3.44085	0	1.55383	11.196	Q6IQ49
Q6KC79	NIPBL	Nipped-B-like protein	27.6705	27.6193	27.4676	27.4903	27.2929	27.5153	27.2679	27.3473	27.412	-0.0904333	0.330707					+	P-BF_Ctrl	22	22	22	10.9	10.9	10.9	316.05	0	109.6	2373600000	69	0.755579	0.0730484	-0.152966	-1.64382	1.52303	0.00572093	-0.243391	-3.29799	Q6KC79
Q6MZP7	LIN54	Protein lin-54 homolog	27.662	27.325	27.1347	29.0327	28.9222	28.8548	29.2627	28.8863	28.925	0.0881	0.536041				+	+	FB-P_Ctrl;P-BF_Ctrl	17	17	17	36.2	36.2	36.2	79.493	0	137.3	2835100000	110	3.18285	0.000174863	1.56264	9.60651	2.97106	0.000115663	1.65079	8.46164	Q6MZP7
Q6NSI4	CXorf57	Uncharacterized protein CXorf57	28.1663	28.1598	27.9459	28.8277	29.0423	28.9655	28.4918	28.6077	28.6474	-0.362867	0.0097455				+	+	FB-P_Ctrl;P-BF_Ctrl	23	23	23	33.1	33.1	33.1	97.553	0	127.14	3662300000	166	3.05794	0.000154839	0.854498	8.91513	2.33147	0.000996678	0.49164	5.7068	Q6NSI4
Q6NZY4	ZCCHC8	Zinc finger CCHC domain-containing protein 8	28.8464	28.6854	28.5565	28.9435	28.9071	28.9379	29.4821	29.2794	29.4537	0.475567	0.00178951					+	P-BF_Ctrl	24	24	24	50.1	50.1	50.1	78.576	0	215.08	4795700000	226	1.29309	0.0132842	0.233364	2.75861	2.5992	0.000660269	0.708964	6.74634	Q6NZY4
Q6P1L8	MRPL14	39S ribosomal protein L14, mitochondrial	27.8272	27.6076	27.5619	26.0272	26.526	26.8453	27.4084	27.5216	27.4587	0.996733	0.0142838				+		FB-P_Ctrl	5	5	5	41.4	41.4	41.4	15.947	0	32.922	2327400000	54	2.05173	0.00231544	-1.19938	-4.7643	1.08007	0.0196324	-0.20266	-2.29754	Q6P1L8
Q6P1R3	MSANTD2	Myb/SANT-like DNA-binding domain-containing protein 2	26.9032	26.614	26.4367	28.1148	27.5882	27.7096	27.8473	27.923	27.9325	0.0967333	0.5814				+	+	FB-P_Ctrl;P-BF_Ctrl	10	10	10	25	25	25	61.319	0	73.615	1539000000	64	2.27542	0.001527	1.15286	5.50701	3.07675	0	1.24962	9.01622	Q6P1R3
Q6P1X5	TAF2	Transcription initiation factor TFIID subunit 2	26.2321	26.1195	26.0218	26.5078	26.3094	26.4458	25.9116	25.6959	26.2555	-0.466667	0.0543806				+		FB-P_Ctrl	13	13	13	12.7	12.7	12.7	136.97	0	23.032	1008100000	46	1.60935	0.00597568	0.29656	3.51395	0.416312	0.26884	-0.170084	-0.978042	Q6P1X5
Q6P2E9	EDC4	Enhancer of mRNA-decapping protein 4	29.6508	29.5141	29.4729	28.6238	28.6076	28.6435	28.4623	28.1734	28.2263	-0.337633	0.0194996				+	+	FB-P_Ctrl;P-BF_Ctrl	28	28	28	30.8	30.8	30.8	151.66	0	278.21	9302900000	285	4.13542	0	-0.920926	-16.821	3.57565	0	-1.25858	-12.1224	Q6P2E9
Q6P2Q9	PRPF8	Pre-mRNA-processing-splicing factor 8	31.183	31.1306	31.0195	31.2851	31.278	31.4178	31.7719	31.581	31.5651	0.312367	0.0178416				+	+	FB-P_Ctrl;P-BF_Ctrl	85	85	85	43.6	43.6	43.6	273.6	0	323.31	34875000000	1264	1.50708	0.00848705	0.21594	3.25896	2.52356	0.000724584	0.528327	6.43756	Q6P2Q9
Q6P3W7	SCYL2	SCY1-like protein 2	27.3709	27.3392	27.3138	27.5932	27.2852	27.4493	26.3818	26.6854	26.193	-1.0225	0.00374772					+	P-BF_Ctrl	11	11	11	17.3	17.3	17.3	103.71	0	26.584	2379500000	60	0.487199	0.215994	0.101281	1.11929	2.50949	0.000719927	-0.921228	-6.3815	Q6P3W7
Q6P996	PDXDC1	Pyridoxal-dependent decarboxylase domain-containing protein 1	27.392	27.2801	27.2539	26.9441	26.473	26.1131	26.2688	25.684	26.4561	-0.373767	0.326537				+	+	FB-P_Ctrl;P-BF_Ctrl	13	13	13	22.1	22.1	22.1	86.706	0	41.711	2172800000	86	1.51117	0.00831189	-0.798597	-3.26895	2.11331	0.00205653	-1.17236	-4.96047	Q6P996;Q6P474
Q6PII3	CCDC174	Coiled-coil domain-containing protein 174	26.298	25.7375	25.7028	28.5248	27.5608	27.6647	27.1534	26.8704	27.6038	-0.707567	0.130489				+	+	FB-P_Ctrl;P-BF_Ctrl	10	10	10	27.2	27.2	27.2	53.957	0	42.83	853280000	48	2.28671	0.00154135	2.00401	5.54678	1.96759	0.00283563	1.29646	4.50577	Q6PII3
Q6PIW4	FIGNL1	Fidgetin-like protein 1	25.3053	25.2857	25.2673	26.2778	26.1219	25.967	26.2052	26.0164	25.9922	-0.0509667	0.673139				+	+	FB-P_Ctrl;P-BF_Ctrl	5	5	4	10.7	10.7	8.9	74.076	0	11.591	626250000	46	3.1197	0.000163265	0.836138	9.251	3.48821	0	0.785185	11.5135	Q6PIW4
Q6PJT7	ZC3H14	Zinc finger CCCH domain-containing protein 14	29.0124	28.9598	28.8105	29.5658	29.6144	29.6317	29.7603	29.6166	29.7446	0.1032	0.105949				+	+	FB-P_Ctrl;P-BF_Ctrl	17	17	17	30.2	30.2	30.2	82.875	0	94.607	7636800000	185	3.35425	0.000212389	0.676409	10.6367	3.30052	0	0.779622	10.3031	Q6PJT7
Q6PK04	CCDC137	Coiled-coil domain-containing protein 137	26.2903	26.2882	26.1604	25.3773	25.5191	25.3737	25.9423	26.0273	25.9595	0.553	0.000529517				+	+	FB-P_Ctrl;P-BF_Ctrl	5	5	5	21.8	21.8	21.8	33.231	0	24.473	832080000	60	3.66727	0	-0.822911	-12.7933	2.23884	0.0014372	-0.269954	-5.37971	Q6PK04
Q6PKG0	LARP1	La-related protein 1	32.5365	32.5301	32.4872	32.0308	31.8388	31.971	31.3918	31.2297	31.2683	-0.650267	0.000968001				+	+	FB-P_Ctrl;P-BF_Ctrl	48	48	46	54.8	54.8	52.6	123.51	0	323.31	86707000000	1398	3.20188	0.000179104	-0.571063	-9.71612	4.73454	0	-1.22129	-23.8178	Q6PKG0
Q6ULP2	AFTPH	Aftiphilin	26.6832	26.5694	26.5449	Not detected	25.6359	25.7727	Not detected	Not detected	Not detected	#DIV/0!	#DIV/0!				+		FB-P_Ctrl	10	10	10	16.3	16.3	16.3	102.11	0	36.94	1159800000	40	2.89743	0.00055761	-0.894881	-11.9309	0	1	Not detected	0	Q6ULP2
Q6UN15	FIP1L1	Pre-mRNA 3-end-processing factor FIP1	28.4092	28.3635	28.2909	28.8135	28.7069	28.7197	29.2971	28.9964	29.0162	0.356533	0.0255872				+	+	FB-P_Ctrl;P-BF_Ctrl	11	11	11	26.1	26.1	26.1	66.526	0	144.21	4673400000	187	2.9094	0.000564841	0.392182	8.15268	2.7199	0.000297071	0.748697	7.26567	Q6UN15
Q6UX04	CWC27	Peptidyl-prolyl cis-trans isomerase CWC27 homolog	26.7484	26.6794	26.4559	27.8215	27.9349	27.9008	27.467	27.2484	27.3777	-0.521367	0.00190998				+	+	FB-P_Ctrl;P-BF_Ctrl	8	8	8	29.4	29.4	29.4	53.846	0	116.36	1321100000	95	3.73595	0	1.25783	13.3195	2.60612	0.000664093	0.736455	6.77522	Q6UX04
Q6UXN9	WDR82	WD repeat-containing protein 82	30.0753	30.0383	30.0141	30.6226	30.8937	30.9604	30.509	30.861	30.9195	-0.0624	0.723935				+	+	FB-P_Ctrl;P-BF_Ctrl	13	13	13	36.4	36.4	36.4	35.079	0	276.36	17292000000	270	2.76535	0.000768041	0.783004	7.47014	2.2926	0.00139459	0.720577	5.56762	Q6UXN9
Q6VMQ6	ATF7IP	Activating transcription factor 7-interacting protein 1	25.4917	25.4727	25.3245	26.9555	26.6349	26.446	26.0395	25.4083	25.7525	-0.945367	0.0159139				+		FB-P_Ctrl	8	8	8	10.9	10.9	10.9	136.39	0	39.186	592860000	43	2.86058	0.000539202	1.24919	7.91535	0.732898	0.0633754	0.303811	1.59944	Q6VMQ6
Q6W2J9	BCOR	BCL-6 corepressor	27.8361	27.8091	27.689	28.669	28.5347	28.4518	29.438	28.891	29.2614	0.644967	0.0203885				+	+	FB-P_Ctrl;P-BF_Ctrl	28	28	28	23.4	23.4	23.4	192.19	0	84.601	3487700000	137	3.24178	0.000186408	0.773786	9.94966	2.97369	0.000115942	1.41874	8.47507	Q6W2J9
Q6WKZ4	RAB11FIP1	Rab11 family-interacting protein 1	28.243	28.0602	27.9933	27.986	27.3473	28.0873	26.9998	27.3299	27.0879	-0.667667	0.0568766					+	P-BF_Ctrl	12	12	11	15.7	15.7	14.8	137.17	0	55.567	3983900000	42	0.52802	0.180579	-0.291946	-1.19966	2.82738	0.000106667	-0.959628	-7.75752	Q6WKZ4
Q6XZF7	DNMBP	Dynamin-binding protein	25.1493	24.9521	24.8188	25.3233	25.5703	26.1575	24.066	Not detected	23.9554	-1.673	0.013855					+	P-BF_Ctrl	5	5	5	4.6	4.6	4.6	177.35	0	21.333	419450000	20	1.2563	0.0146377	0.710313	2.67659	2.28714	0.00138662	-0.962722	-7.3709	Q6XZF7
Q6Y7W6	GIGYF2	PERQ amino acid-rich with GYF domain-containing protein 2	29.2488	29.1278	28.9963	28.7088	28.2405	28.313	28.4261	28.0987	28.14	-0.199167	0.326446				+	+	FB-P_Ctrl;P-BF_Ctrl	19	19	19	22.6	22.6	22.6	150.07	0	323.31	6599300000	256	1.9055	0.00284839	-0.70352	-4.32169	2.69492	0.000517986	-0.902692	-7.15542	Q6Y7W6
Q6ZRS2	SRCAP	Helicase SRCAP	25.5521	25.5395	25.53	25.9261	25.2836	25.7218	27.5132	27.2649	26.771	1.5392	0.00597895					+	P-BF_Ctrl	12	12	12	4.5	4.5	4.5	343.55	0	25.476	798900000	50	0.211267	0.734066	0.103322	0.544869	2.77777	0.000203905	1.64253	7.52692	Q6ZRS2
Q6ZSR9		Uncharacterized protein FLJ45252	26.8056	26.757	26.6917	27.0455	26.7949	27.0268	26.1626	25.826	25.7659	-1.03757	0.00214812					+	P-BF_Ctrl	10	10	10	47.6	47.6	47.6	37.976	0	48.894	1557700000	119	1.10296	0.0236317	0.204301	2.34561	2.54412	0.000642991	-0.833248	-6.52027	Q6ZSR9
Q6ZTW0	TPGS1	Tubulin polyglutamylase complex subunit 1	29.8215	29.808	29.7064	27.0065	25.8507	26.5139	27.6998	27.4931	27.7283	1.18337	0.0260443				+	+	FB-P_Ctrl;P-BF_Ctrl	13	13	13	56.6	56.6	56.6	31.274	0	268.96	5277100000	223	3.22693	0.000183556	-3.32163	-9.86214	4.88048	0	-2.13827	-25.9169	Q6ZTW0
Q6ZU35	KIAA1211	Uncharacterized protein KIAA1211	26.7397	26.7268	26.7212	25.6935	25.7431	25.6106	25.557	Not detected	25.367	-0.2204	0.0843581				+	+	FB-P_Ctrl;P-BF_Ctrl	11	11	11	11.9	11.9	11.9	136.76	0	30.732	1353100000	29	4.9395	0	-1.04679	-26.8169	3.41312	0	-1.26717	-17.8057	Q6ZU35
Q6ZWJ1	STXBP4	Syntaxin-binding protein 4	25.6601	25.5778	25.555	25.9403	25.9854	25.9511	24.8594	25.2526	25.1285	-0.878767	0.00167327				+	+	FB-P_Ctrl;P-BF_Ctrl	8	8	8	19.7	19.7	19.7	61.661	0	67.299	780600000	49	3.31832	0.000202105	0.361278	10.4126	1.89801	0.00296692	-0.517523	-4.29986	Q6ZWJ1
Q70E73	RAPH1	Ras-associated and pleckstrin homology domains-containing protein 1	27.7298	27.6531	27.6352	27.4289	27.208	27.4271	25.7157	26.4859	26.8032	-1.01973	0.0369392				+	+	FB-P_Ctrl;P-BF_Ctrl	10	10	10	14.6	14.6	14.6	135.25	0	69.283	2761400000	77	1.80387	0.00349743	-0.318046	-4.03193	1.83774	0.0035354	-1.3378	-4.12695	Q70E73
Q71RC2	LARP4	La-related protein 4	27.937	27.7975	27.6682	26.4489	26.3762	26.0868	26.3096	26.1853	26.468	0.017	0.907608				+	+	FB-P_Ctrl;P-BF_Ctrl	9	9	9	18	18	18	80.595	0	37.367	2907000000	87	3.42316	0.00023301	-1.49694	-11.0795	3.71063	0	-1.47996	-13.1231	Q71RC2
Q71UM5	RPS27L	40S ribosomal protein S27-like	27.3243	27.2149	27.1357	Not detected	Not detected	26.3866	26.6861	26.7394	25.9906	0.0854333	#DIV/0!					+	P-BF_Ctrl	4	2	2	32.1	15.5	15.5	9.4771	0	5.9887	1495400000	35	0	0.902261	-0.838416	0	1.41742	0.0076052	-0.752943	-3.04417	Q71UM5
Q7KZF4	SND1	Staphylococcal nuclease domain-containing protein 1	32.0555	31.9748	31.8388	31.2031	31.2183	31.0776	31.2352	31.2356	31.2249	0.0655667	0.216491				+	+	FB-P_Ctrl;P-BF_Ctrl	42	42	42	54	54	54	102	0	323.31	50758000000	1128	3.28525	0.000194726	-0.790034	-10.2101	3.47712	0	-0.724421	-11.4384	Q7KZF4
Q7KZI7	MARK2	Serine/threonine-protein kinase MARK2	26.844	26.5779	26.5637	25.796	26.0803	26.1323	25.9043	25.9474	25.8109	-0.115333	0.36136				+	+	FB-P_Ctrl;P-BF_Ctrl	8	7	7	14.5	13.3	13.3	87.91	0	23.462	1466800000	36	2.04767	0.00230972	-0.65896	-4.75159	2.82998	0.000106785	-0.774335	-7.76978	Q7KZI7
Q7L014	DDX46	Probable ATP-dependent RNA helicase DDX46	32.8721	32.7115	32.6888	33.6411	33.462	33.5439	33.4665	33.2806	33.3896	-0.1701	0.0852108				+	+	FB-P_Ctrl;P-BF_Ctrl	58	58	58	49.1	49.1	49.1	117.36	0	323.31	1115900000000000	1779	3.28554	0.000195519	0.791543	10.2119	2.8509	0.000107987	0.621452	7.869	Q7L014
Q7L1T6	CYB5R4	Cytochrome b5 reductase 4	27.7381	27.5734	27.06	26.5678	26.5424	26.4351	25.7714	25.8666	26.0787	-0.609533	0.0035991				+	+	FB-P_Ctrl;P-BF_Ctrl	14	14	14	37.6	37.6	37.6	59.473	0	44.315	1720600000	75	1.97392	0.00270998	-0.942099	-4.52484	2.64586	0.000679842	-1.55166	-6.94312	Q7L1T6
Q7L2E3	DHX30	Putative ATP-dependent RNA helicase DHX30	27.7037	27.6802	27.5875	26.237	26.1436	25.862	26.5213	26.4628	26.2948	0.345433	0.0584639				+	+	FB-P_Ctrl;P-BF_Ctrl	20	20	20	22.4	22.4	22.4	133.94	0	49.17	2281100000	108	3.73872	0	-1.57626	-13.3411	4.05689	0	-1.23081	-16.0686	Q7L2E3
Q7L2H7	EIF3M	Eukaryotic translation initiation factor 3 subunit M	26.9084	26.7685	26.5418	Not detected	26.6885	27.036	25.189	25.3226	24.9825	-1.69755	0.0026046					+	P-BF_Ctrl	7	7	7	28.3	28.3	28.3	42.502	0	113.79	1321600000	40	0.249536	0.649538	0.122657	0.648382	3.38271	0	-1.57489	-10.8175	Q7L2H7
Q7L2J0	MEPCE	7SK snRNA methylphosphate capping enzyme	28.0651	28.0364	28.0155	28.3917	28.5219	28.4456	28.7618	28.3453	28.3865	0.0448	0.761359				+	+	FB-P_Ctrl;P-BF_Ctrl	15	15	15	36.6	36.6	36.6	74.354	0	102.95	4098900000	175	3.29127	0.000197125	0.41406	10.2467	1.58122	0.00486035	0.458871	3.4427	Q7L2J0
Q7L576	CYFIP1	Cytoplasmic FMR1-interacting protein 1	26.1754	25.9077	25.8221	24.7536	Not detected	Not detected	24.923	24.7972	24.5757	0.0117	#DIV/0!					+	P-BF_Ctrl	19	9	9	17	8.2	8.2	145.18	0	19.491	774350000	28	0	0.906242	-1.21475	0	2.91517	0.000111628	-1.20307	-8.18112	Q7L576
Q7L590	MCM10	Protein MCM10 homolog	25.473	25.4212	25.4167	25.9165	25.9284	26.5845	26.1417	26.2929	26.3655	0.123567	0.620096				+	+	FB-P_Ctrl;P-BF_Ctrl	10	10	10	15	15	15	98.182	0	53.93	627020000	36	1.47811	0.00893248	0.706139	3.18871	3.57781	0	0.829702	12.1378	Q7L590
Q7L5N1	COPS6	COP9 signalosome complex subunit 6	25.9354	25.8981	25.869	26.4843	Not detected	Not detected	25.4551	Not detected	25.3744	-1.06955	#DIV/0!					+	P-BF_Ctrl	5	5	5	20.8	20.8	20.8	36.163	0.00031377	4.7919	833880000	35	0	0.904101	0.583482	0	2.95417	0.000114558	-0.48606	-12.4707	Q7L5N1
Q7LBC6	KDM3B	Lysine-specific demethylase 3B	29.5161	29.4258	29.4044	30.9963	30.8215	30.8972	31.1923	30.9709	31.015	0.1544	0.141661				+	+	FB-P_Ctrl;P-BF_Ctrl	43	43	41	34.8	34.8	33.3	191.58	0	323.31	13097000000	559	4.73593	0	1.45628	23.837	4.5371	0	1.61068	21.243	Q7LBC6
Q7Z2K8	GPRIN1	G protein-regulated inducer of neurite outgrowth 1	29.3583	29.3184	29.2438	28.2527	28.2163	28.1571	27.7104	26.8664	27.7804	-0.7563	0.0623995				+	+	FB-P_Ctrl;P-BF_Ctrl	21	21	21	30.4	30.4	30.4	102.4	0	88.777	8036900000	154	4.8307	0	-1.09817	-25.1811	2.48218	0.000797088	-1.85446	-6.27385	Q7Z2K8
Q7Z2T5	TRMT1L	TRMT1-like protein	26.6058	26.503	26.4591	26.0511	26.0712	25.9518	25.9645	25.6635	25.8843	-0.187267	0.126509				+	+	FB-P_Ctrl;P-BF_Ctrl	11	11	11	26.6	26.6	26.6	81.746	0	59.869	1096900000	82	3.02331	0.000472441	-0.497971	-8.7318	2.62518	0.000672532	-0.685196	-6.85528	Q7Z2T5
Q7Z2W4	ZC3HAV1	Zinc finger CCCH-type antiviral protein 1	30.5367	30.5165	30.5118	29.4965	29.4596	29.3277	29.2858	29.1942	29.1342	-0.2232	0.0298669				+	+	FB-P_Ctrl;P-BF_Ctrl	26	26	25	37.4	37.4	36.5	101.43	0	323.31	20310000000	578	4.52716	0	-1.09377	-21.1209	5.10151	0	-1.31696	-29.4499	Q7Z2W4
Q7Z2W9	MRPL21	39S ribosomal protein L21, mitochondrial	25.1027	24.9749	24.7534	Not detected	Not detected	Not detected	23.8339	23.8537	23.9407	#DIV/0!	#DIV/0!					+	P-BF_Ctrl	3	3	3	20	20	20	22.814	0.00029172	3.6934	268290000	17	0	0.915457	Not detected	0	3.24361	0	-1.06757	-9.9605	Q7Z2W9
Q7Z2Z2	EFTUD1	Elongation factor Tu GTP-binding domain-containing protein 1	26.3546	26.1313	26.0504	24.8717	25.2855	25.2644	24.3603	24.6972	Not detected	-0.611783	0.0648771				+	+	FB-P_Ctrl;P-BF_Ctrl	9	9	9	11.1	11.1	11.1	125.43	0	52.582	866680000	50	2.5122	0.00122041	-1.0382	-6.39226	2.61981	0.000667961	-1.65002	-9.59814	Q7Z2Z2
Q7Z309	FAM122B	Protein FAM122B	25.4528	25.1381	#NUM!	26.0526	26.4295	26.2535	25.5853	25.8119	25.6947	-0.5479	0.0125136				+		FB-P_Ctrl	4	4	4	21.1	21.1	21.1	26.928	0	21.611	277830000	18	1.85659	0.00313424	0.949765	5.18723	1.16118	0.0153992	0.401862	2.77992	Q7Z309
Q7Z3B4	NUP54	Nucleoporin p54	26.7389	26.6148	26.6075	27.2584	27.0647	26.9594	26.9946	27.053	27.1274	-0.0358333	0.726881				+	+	FB-P_Ctrl;P-BF_Ctrl	11	11	11	27	27	27	55.435	0	27.23	1470800000	80	1.97289	0.0027057	0.440363	4.52174	2.67066	0.000505517	0.404585	7.04972	Q7Z3B4
Q7Z3K3	POGZ	Pogo transposable element with ZNF domain	27.5899	27.5573	27.3122	28.0943	28.0126	28.1361	28.4183	28.0698	28.2033	0.149467	0.23786				+	+	FB-P_Ctrl;P-BF_Ctrl	23	23	23	23.2	23.2	23.2	155.34	0	70.87	2623200000	152	2.4809	0.00149947	0.594518	6.26882	2.28694	0.00138549	0.743993	5.54759	Q7Z3K3
Q7Z3T8	ZFYVE16	Zinc finger FYVE domain-containing protein 16	29.0357	28.9389	28.9342	27.9855	28.0474	27.7903	27.3485	26.8249	27.1229	-0.8423	0.00777966				+	+	FB-P_Ctrl;P-BF_Ctrl	21	21	21	19.9	19.9	19.9	168.9	0	99.705	5702200000	180	3.58803	0	-1.02856	-12.211	3.5663	0	-1.87086	-12.0558	Q7Z3T8
Q7Z3U7	MON2	Protein MON2 homolog	24.946	24.9212	24.8539	Not detected	Not detected	Not detected	Not detected	24.3685	24.2165	#DIV/0!	#DIV/0!					+	P-BF_Ctrl	5	5	5	3.3	3.3	3.3	190.36	0	6.3566	315350000	10	0	0.9161	Not detected	0	2.56462	0.000650899	-0.614484	-9.1895	Q7Z3U7
Q7Z417	NUFIP2	Nuclear fragile X mental retardation-interacting protein 2	30.2667	30.2464	30.2376	29.7196	29.5544	29.6734	29.6286	29.5256	29.5555	-0.0792333	0.243287				+	+	FB-P_Ctrl;P-BF_Ctrl	19	19	19	41.4	41.4	41.4	76.12	0	282.46	17983000000	412	3.56272	0	-0.601103	-12.0305	4.54944	0	-0.680341	-21.3956	Q7Z417
Q7Z422	SZRD1	SUZ domain-containing protein 1	25.5193	25.4994	25.0785	26.4587	26.1245	25.56	26.0399	25.7416	25.9418	-0.139967	0.639402					+	P-BF_Ctrl	2	2	2	21.7	21.7	21.7	16.997	0	6.3569	406260000	34	1.07186	0.025608	0.682014	2.28039	1.49039	0.00634667	0.542034	3.21839	Q7Z422
Q7Z434	MAVS	Mitochondrial antiviral-signaling protein	27.7955	27.7397	27.7322	26.6611	26.1677	26.6826	26.4258	26.2645	26.5589	-0.0874	0.666963				+	+	FB-P_Ctrl;P-BF_Ctrl	9	9	9	34.6	34.6	34.6	56.527	0	79.871	3158100000	103	2.74842	0.000759236	-1.252	-7.39342	3.97496	0	-1.3394	-15.3186	Q7Z434
Q7Z478	DHX29	ATP-dependent RNA helicase DHX29	29.4201	29.4141	29.3987	28.5531	28.5235	28.5385	27.7982	27.8044	27.9032	-0.7031	3.65336e-05				+	+	FB-P_Ctrl;P-BF_Ctrl	36	36	36	35.7	35.7	35.7	155.23	0	205.16	9957100000	334	6.87789	0	-0.872603	-82.0168	5.85684	0	-1.57573	-45.5406	Q7Z478
Q7Z4G4	TRMT11	tRNA (guanine(10)-N2)-methyltransferase homolog	27.1993	27.0976	26.6886	25.5941	26.0348	25.8613	25.1436	24.8956	24.5701	-0.9603	0.0102001				+	+	FB-P_Ctrl;P-BF_Ctrl	7	7	7	19.4	19.4	19.4	53.42	0	34.97	1251500000	50	2.34864	0.00146757	-1.16507	-5.76914	3.13336	0	-2.12539	-9.32687	Q7Z4G4
Q7Z4H3	HDDC2	HD domain-containing protein 2	28.811	28.7158	28.6406	28.2651	28.3876	28.3463	27.8227	27.8452	27.7622	-0.522967	0.000279187				+	+	FB-P_Ctrl;P-BF_Ctrl	10	10	10	57.8	57.8	57.8	23.39	0	125.56	5486600000	127	2.50981	0.00121645	-0.389448	-6.38277	4.10605	0	-0.912402	-16.5357	Q7Z4H3
Q7Z4H7	HAUS6	HAUS augmin-like complex subunit 6	28.6505	28.6236	28.6143	28.5733	28.3117	28.4864	28.1996	27.9031	27.6932	-0.525167	0.0339508					+	P-BF_Ctrl	23	23	23	31.6	31.6	31.6	108.62	0	126.14	5565500000	207	1.04196	0.0279581	-0.172325	-2.21824	2.04258	0.0023893	-0.697536	-4.73567	Q7Z4H7
Q7Z4V5	HDGFRP2	Hepatoma-derived growth factor-related protein 2	29.883	29.8413	29.8124	29.6931	29.8748	29.8834	29.5111	29.1477	29.4112	-0.460433	0.0210818					+	P-BF_Ctrl	15	14	13	24	22.8	22.8	74.316	0	149.84	10329000000	186	0.163994	0.825847	-0.0284684	-0.435757	1.94312	0.00295341	-0.488913	-4.43257	Q7Z4V5
Q7Z569	BRAP	BRCA1-associated protein	30.8766	30.7376	30.6103	30.1702	30.0426	29.9902	28.9109	28.8275	28.796	-1.22287	4.28475e-05				+	+	FB-P_Ctrl;P-BF_Ctrl	21	21	21	48.3	48.3	48.3	67.304	0	323.31	22600000000	398	2.70406	0.000866995	-0.673868	-7.1956	4.63856	0	-1.89675	-22.5298	Q7Z569
Q7Z589	EMSY	Protein EMSY	27.5088	27.1889	27.0829	28.5413	27.9329	28.3285	29.1011	28.6693	28.7869	0.584867	0.0564558				+	+	FB-P_Ctrl;P-BF_Ctrl	22	22	22	24.1	24.1	24.1	141.47	0	80.371	2347500000	120	1.99564	0.00265495	1.00738	4.59077	3.0296	0	1.59223	8.76484	Q7Z589
Q7Z5J4	RAI1	Retinoic acid-induced protein 1	27.0387	26.8495	26.8203	28.0182	27.2912	27.3068	29.0961	28.8657	28.3453	1.2303	0.0196964					+	P-BF_Ctrl	18	17	17	16.2	15.6	15.6	203.35	0	58.765	1470200000	70	1.19864	0.0175499	0.635891	2.55018	2.8845	0.000109966	1.86623	8.03083	Q7Z5J4
Q7Z5K2	WAPAL	Wings apart-like protein homolog	30.1207	29.9557	29.8859	30.9587	30.6739	30.787	30.92	30.6218	30.6371	-0.0802333	0.563291				+	+	FB-P_Ctrl;P-BF_Ctrl	34	34	34	37.6	37.6	37.6	132.94	0	323.31	15343000000	454	2.78774	0.000780105	0.819086	7.57277	2.46095	0.00078565	0.73889	6.19122	Q7Z5K2
Q7Z5L2	R3HCC1L	Coiled-coil domain-containing protein R3HCC1L	26.5123	26.4999	26.4567	26.3549	25.924	26.0957	25.4674	25.387	25.2189	-0.7671	0.00613762					+	P-BF_Ctrl	7	7	7	13.6	13.6	13.6	87.882	0	45.542	1125200000	42	1.34957	0.0117864	-0.36479	-2.88666	3.94666	0	-1.13186	-15.0675	Q7Z5L2
[truncated: 797 more rows]

## Sheet: c. Hits main localisations
Uniprot database
Entry	Gene	Nuclear	Cytoplasmic	Protein names	Length (AA)	Subcellular location [CC]
[truncated: 207 more rows]

## Sheet: d. Enrichment analysis
Categories depicted in Fig 6.c are highlighted in blue
[truncated: 616 more rows]

[truncated: 1 more sheets: e. N-ter vs. C-ter hits]
